# Supplementary material for: The strength in numbers: comprehensive characterization of house dust using complementary mass spectrometric techniques
Source: PubMed Central journal article supplement (PMC6458998; doi:10.1007/s00216-019-01615-6), 2019-03-04
Supplement: 216_2019_1615_MOESM1_ESM.pdf [file 216_2019_1615_MOESM1_ESM.pdf]

## **Analytical and Bioanalytical Chemistry**

### **Electronic Supplementary Material**

#### **The strength in numbers: comprehensive characterization of house dust using complementary mass spectrometric techniques**

Pawel Rostkowski, Peter Haglund, Reza Aalizadeh, Nikiforos Alygizakis, Nikolaos Thomaidis, Joaquin Beltran Arandes, Pernilla Bohlin Nizzetto, Petra Booij Hélène Budzinski, Pamela Brunswick, Adrian Covaci, Christine Gallampos, Sylvia Grosse, Ralph Hindle, Ildiko Ipolyi, Karl Jobst, Sarit L.Kaserzon, Pim Leonards, Francois Lestremau, Thomas Letzel, Jörgen Magnér, Hidenori Matsukami, Christoph Moschet, Peter Oswald, Merle Plassmann, Jaroslav Slobodnik, Chun Yang

Additional file available under [10.1007/s00216-019-01615-6](https://doi.org/10.1007/s00216-019-01615-6)

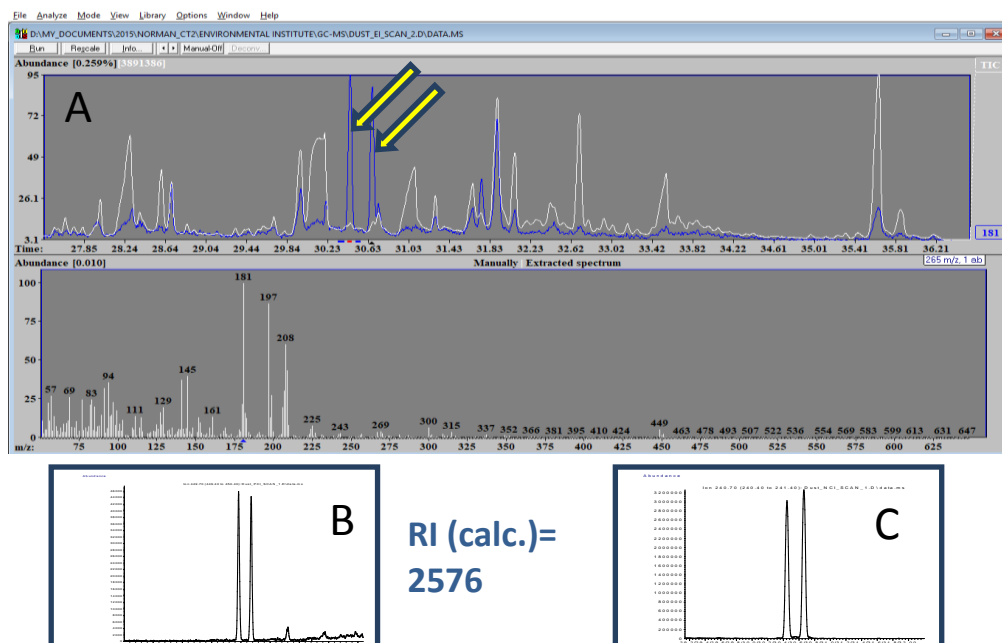

**Fig. S1** Tentative identification of cyhalothrin in house dust extract. A) Total ion chromatogram (TIC), electron ionization (EI) spectrum, and base peak chromatogram (m/z 181). The base peak chromatogram displays two peaks, indicated with yellow arrows that were tentatively identified as cyhalothrin isomers. B) Positive chemical ionization (PCI) mass fragmentogram of cyhalothrin pseudo-molecular ions (m/z 449.7). C) Negative chemical ionization (NCI) mass fragmentogram of a characteristic cyhalothrin fragment (m/z 240.7), demonstrating an excellent signal-to-noise ratio as a result of high response in NCI because of the presence of halogens (at m/z 240.7)

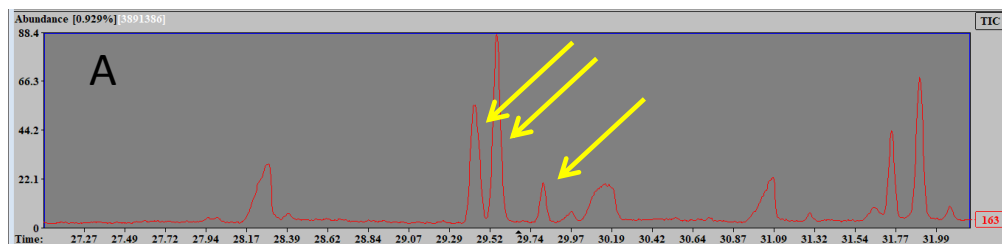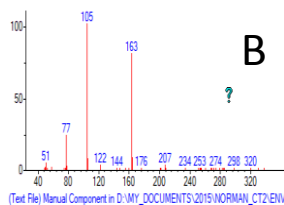

Lib. match = 86%

RI (NIST) = 1526

RI (calc.) = 2485

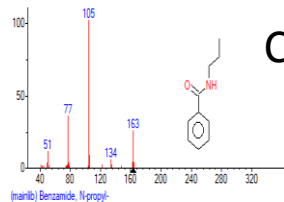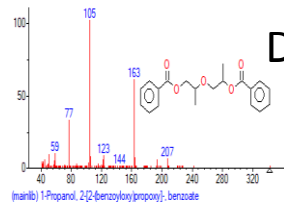

RI (NIST) = 2445

**Fig. S2** Tentative identification of dipropylene glycol dibenzoates in house dust extract. A) Extracted ion chromatogram (m/z 163) with three peaks labelled with yellow arrows. B) Manually extracted spectrum of one of the three peaks (all spectra very similar). C) NIST electron ionization (EI) spectrum of the best matching compound N-propyl benzamide (match 86%). D) Electron ionization (EI) spectrum of an alternative compound dipropylene glycol dibenzoate; obtained after applying constraints. The retention index (RI) of sample constituent “B” and the two NIST entries are shown below each spectrum

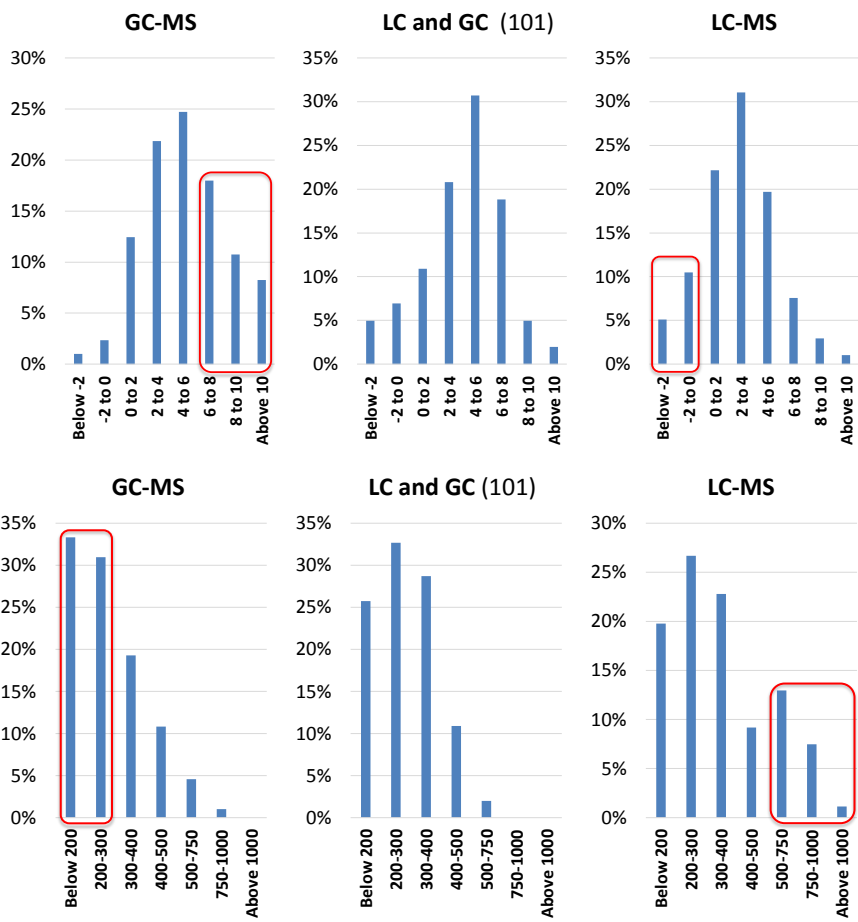

**Fig. S3** Lipophilicity distribution (top row) and size distribution of (tentatively) identified compounds in house dust

**Table S1a** Information about the compounds used for the calculation of RTI for the LC-MS techniques. LogP was calculated using ChemAxon

| <b>Substance name</b> | <b>LogP</b> |
|-----------------------|-------------|
| Metformin             | -1.36       |
| Chloridazon           | 1.11        |
| Carbetamide           | 1.65        |
| Monuron               | 1.93        |
| Metobromuron          | 2.24        |
| Chlorbromuron         | 2.85        |
| Metconazole           | 3.59        |
| Diazinon              | 4.19        |
| Quinoxifen            | 4.98        |
| Fenofibrate           | 5.28        |

**Table S1b** Information about the compounds used for the calculation of RTI for the LCMS techniques (TrAMS RTI model)

| Type of calibrant | Substance name             | CAS number  |
|-------------------|----------------------------|-------------|
| ESI+              | Guanylurea                 | 141-83-3    |
| ESI+              | Amitrol                    | 61-82-5     |
| ESI+              | Histamine                  | 51-45-6     |
| ESI+              | Chlormequat                | 999-81-5    |
| ESI+              | Methamidophos              | 10265-92-6  |
| ESI+              | Vancomycin                 | 1404-90-6   |
| ESI+              | Cefoperazone               | 62893-19-0  |
| ESI+              | Trichlorfon (Dylox)        | 52-68-6     |
| ESI+              | Butocarboxim               | 34681-10-2  |
| ESI+              | Dichlorvos                 | 62-73-7     |
| ESI+              | Tylosin                    | 1401-69-0   |
| ESI+              | TCMTB                      | 21564-17-0  |
| ESI+              | Rifaximin                  | 80621-81-4  |
| ESI+              | Spinosad A (Spinosyn A)    | 131929-60-7 |
| ESI+              | Emamectin B1a              | 121124-29-6 |
| ESI+              | Avermectin B1a (Abamectin) | 71751-41-2  |
| ESI+              | Nigericin                  | 28380-24-7  |
| ESI+              | Ivermectin B1a             | 70288-86-7  |
| ESI-              | Amitrole                   | 61-82-5     |
| ESI-              | Benzoic acid               | 65-85-0     |
| ESI-              | Acephate                   | 30560-19-1  |
| ESI-              | Salicylic acid             | 69-72-7     |
| ESI-              | Simazine 2-Hydroxy         | 2599-11-3   |
| ESI-              | Tepraloxydim               | 149979-41-9 |
| ESI-              | Bromoxynil                 | 1689-84-5   |
| ESI-              | MCPA                       | 94-74-6     |
| ESI-              | Valproic acid              | 99-66-1     |
| ESI-              | Phenytoin                  | 57-41-0     |
| ESI-              | Flamprop                   | 58667-63-3  |
| ESI-              | Benodanil                  | 15310-01-7  |
| ESI-              | Dinoterb                   | 1420-07-1   |
| ESI-              | Inabenfide                 | 82211-24-3  |
| ESI-              | Coumaphos                  | 56-72-4     |
| ESI-              | Triclosan                  | 3380-34-5   |
| ESI-              | AvermectinB1a (Abamectin)  | 65195-55-3  |
| ESI-              | Salinomycin                | 53003-10-4  |

**Table S2** Information about the LC-MS equipment and LC conditions used by the participants in the collaborative trial

| Participant number | Instrument and model      | Column                             | Dimensions                                                    | Solvent                                                                                                       | Injection ( $\mu$ L) | Flow (ml/min); run time (min)   |
|--------------------|---------------------------|------------------------------------|---------------------------------------------------------------|---------------------------------------------------------------------------------------------------------------|----------------------|---------------------------------|
| Lab 1              | Agilent 6550 Q-TOF        | Agilent Poroshell 120 SB-C18       | 3.5 $\mu$ m<br>2.1x50mm                                       | positive mode: A= 0.1% FA, B= ACN, 0.1% FA<br>negative mode: A= 0.1% AcA, B= ACN, 0.1% AcA                    | 2                    | 0.4; 55                         |
| Lab 2              | Agilent 6560 IM-QTOF      | Phenomenex                         | 2.6 $\mu$ m<br>2.1x150mm                                      | A= 0.1% FA<br>B= MeOH, 0.1% FA                                                                                | 1                    | 0.5; 60                         |
| Lab 4              | Agilent 6530 Q-TOF        | Zorbax Eclipse Plus C18            | 1.8 $\mu$ m<br>2.1x100mm                                      | positive mode: A= 0.1% FA, B=ACN, 0.1% FA<br>Negative mode: A= 1mM NH4F B=ACN                                 | 10                   | 0.35; 22                        |
| Lab 5              | Agilent 6550 Q-TOF        | Acquity HSS T3                     | 1.8 $\mu$ m<br>2.1x50mm                                       | A= 10nM NH4Ac, pH 4.7 FA<br>B= MeOH                                                                           | 50                   | 0.4; 20                         |
| Lab 6              | Bruker Maxis Impact       | Acclaim RSLC C18                   | 2.2 $\mu$ m<br>2.1x100mm                                      | A= 10% MeOH, 0.01% FA, 5mM ammonium formate<br>B= MeOH, 0.01% FA, 5mM ammonium formate                        | 5                    | 0.2-0.48; 20                    |
| Lab 7              | Agilent 6550 Q-TOF        | Waters Acquity HSS T3              | 1.8 $\mu$ m<br>2.1x150                                        | A= water<br>B= MeOH                                                                                           | 3                    | 0.3, 30                         |
| Lab 8              | Exactive Orbitrap LC-MS   | Agilent, Poroshell C18             | 2.7 $\mu$ m<br>2.1x50mm                                       | A= water, B= ACN<br>C= Isopropanol                                                                            | 5                    | 0.2; 40                         |
| Lab 9              | Agilent 6550 Q-TOF        | Phenomenex Kinetex-EVO C18         | 2.6 $\mu$ m<br>2.1x100mm                                      | A= 10mM NH4Ac<br>B= MeOH                                                                                      | 2                    | 0.4; 25                         |
| Lab 10             | Waters XEVO G2 QTOF       | Waters Cortecs C18                 | 3.5 $\mu$ m<br>2.1x100mm                                      | A= 0.01% FA<br>B= MeOH, 0.01% FA                                                                              | 20                   | 0.3; 14                         |
| Lab 11             | Agilent 6545 QTOF         | Agilent Poroshell 120 Phenyl-Hexyl | 2.7 $\mu$ m<br>3.0x100mm                                      | A = 1 mM NH4F<br>B = MeOH                                                                                     | 5                    | 0.4; 16                         |
| Lab 12             | Q Exactive HF Orbitrap    | Hypersil GOLD aQ (Thermo) C18 (aq) | 1.9 $\mu$ m<br>2.1x100mm                                      | A= 0.1% FA,<br>B= ACN, 0.1% FA                                                                                | 5                    | 0.4; 10                         |
| Lab 13             | Agilent 6530 Q-TOF        | Phenomenex Kinetex Biphenyl        | 2.6 $\mu$ m<br>2.1x100mm                                      | A= 0.04% FA, pH 2.6<br>B= 95 % ACN, 5 % A                                                                     | 2                    | 0.4; 25.5                       |
| Lab 14             | Bruker micro TOF II       | GL Sciences InertSustain C18       | 3.5 $\mu$ m<br>2.1x100mm                                      | A: water<br>B: MeOH                                                                                           | 0.3                  |                                 |
| Lab 15             | Q Exactive Focus Orbitrap | Thermo Accucore C18                | 2.6 $\mu$ m<br>2.1x50mm                                       | A= 10mM HOAc<br>B= MeOH                                                                                       | 2                    | 0.3; 21                         |
| Lab 16             | Agilent 6540 Q-TOF        | Phenomenex Kinetex C18             | 1.7 $\mu$ m<br>2.1x100mm                                      | positive mode: A= 0.1% FA, B= ACN, 0.1% FA<br>negative mode: A=water; B=ACN                                   | 2                    | 0.3; 47                         |
| Lab 17             | Agilent 6550 Q-TOF        | Waters Acquity UPLC BEH C18        | 1.7 $\mu$ m<br>2.1x100mm                                      | A= 10%MeOH, 0.1% FA<br>B= MeOH, 0.1%FA                                                                        | 2                    | 0.3; 22.5                       |
| Lab 18             | Agilent 6530 Q-TOF        | Zorbax Eclipse Plus C18            | 1.8 $\mu$ m<br>2.1x100 mm                                     | A= 5mM NH4Ac<br>B = 5mM NH4Ac in MeOH                                                                         | 2                    | 0.3; 45                         |
| Lab 19             | Agilent 6230 TOF          | C18 and Zic-HILIC                  | 5 $\mu$ m, 2.1x150mm (HILIC), 2.7 $\mu$ m 3.0x50mm (C18)      | A= CAN, B= water (HILIC),<br>A= 90% 10mM NH4Ac: 10% ACN, B= 90% ACN:<br>10% 10mM NH4Ac (C18)                  | 10                   | 0.05 (C18);<br>0.4 (HILIC)      |
| Lab 20             | AB Sciex Triple TOF 5600  | Agilent Zorbax XDB C18             | ESI+ : 1.8 $\mu$ m, 2.1x100mm<br>ESI- : 1.8 $\mu$ m, 4.6x50mm | positive mode: A= 0.1% FA, B= MeOH, 0.1% FA<br>negative mode: A= 1% MeOH, 5nM NH4Ac<br>B= 95% MeOH, 5mM NH4Ac | ESI+: 5<br>ESI-: 10  | ESI+: 0.4,<br>16.50<br>ESI-: 10 |

**Table S3** Information about the MS conditions and workflows used by the LC-MS participants in the collaborative trial

| Participant number | Scan Range | Resolution                                 | Ionization         | Fragmentation method | Target Software           | Suspect, NT procedure                                                                                                                            |
|--------------------|------------|--------------------------------------------|--------------------|----------------------|---------------------------|--------------------------------------------------------------------------------------------------------------------------------------------------|
| Lab 1              | 110-1100   | 42,000<br>(m/z=922)                        | ESI                | NA<br>(MS only)      | Mass Hunter               | Mass Hunter, in-house library, Find by formula                                                                                                   |
| Lab 2              | 50-1700    | 40,000<br>(m/z=922)                        | ESI                | CID                  | Mass Hunter               | Mass Hunter, Forensic Tox, Melin, in-house library                                                                                               |
| Lab 4              | 50-1050    | 10,000<br>(m/z=600)                        | ESI                | CE                   | Agilent Mass Hunter Quant | Agilent Mass Hunter Qual, MS, MS/MS library, MS/MS prediction, correlation RT vs. log D (Jchem), R2=0.70, Agilent Molecular Structure Correlator |
| Lab 5              | 100-1000   | Ca 40,000                                  | ESI                | CID                  | Mass Hunter Suite         | PCDL Forensic & Tox and Pesticides, MetFrag, MassFrontier                                                                                        |
| Lab 6              | 50-1000    | 35,000<br>(m/z=500)                        | ESI                | CID                  | TASQ 1.0                  | xcms+nontarget R-packages                                                                                                                        |
| Lab 7              | 100-1700   | 12,000<br>(m/z=119)                        | ESI                | CID                  | Mass Hunter               | Mass Hunter, Agilent Forensic Tox, NILU suspect database                                                                                         |
| Lab 8              | 120-1200   | 100,000<br>(m/z=200)                       | ESI                |                      | Xcalibur                  | ExactFinder                                                                                                                                      |
| Lab 9              | 50-1700    | 25,000<br>(m/z=1000)                       | ESI                | CID                  | Mass Hunter               | Mass Profiler                                                                                                                                    |
| Lab 10             | 50-1000    | 20,000<br>(m/z=556)                        | ESI                | CID                  | ChromaLynx XS             | MS, RT, MSE, prediction, MassFragment, MetFrag, Mass Frontier                                                                                    |
| Lab 11             | 20-1700    | 21,000<br>(m/z 622)                        | ESI                | NA (MS only)         | Mass Hunter               | Metlin, In-house library                                                                                                                         |
| Lab 12             | 100-1000   | 120,000<br>(m/z=200)                       | ESI                | HCD                  | Xcalibur                  | Compound Discoverer, mzCloud and MetFrag                                                                                                         |
| Lab 13             | 59-1100    | 10,000<br>(m/z=200)                        | ESI                | CID                  | Mass Hunter               | Mass Hunter Qual, METLIN, MetFrag, manual fragmentation                                                                                          |
| Lab 14             | 100-1000   | 16,500                                     | ESI                |                      | Target Analysis (Bruker)  | RT prediction on logP, number of references in Chempider                                                                                         |
| Lab 15             | 75-1000    | 70,000<br>(m/z=200)                        | ESI                | AIF                  | Trace Finder              |                                                                                                                                                  |
| Lab 16             | 50-1000    | 12,000<br>(m/z=113)<br>21,000<br>(m/z=602) | ESI                | CID                  | Mass Hunter               | Mass Hunter, Forensic Tox, Melin, MassBank, MetFrag, Pesticides                                                                                  |
| Lab 17             | 50-1000    | Ca 40,000                                  | ESI, APCI,<br>APPI |                      |                           |                                                                                                                                                  |
| Lab 18             | 100-1500   | Ca 10,000                                  | ESI                | NA                   | Mass Hunter Qual          |                                                                                                                                                  |
| Lab 19             |            | 10,000<br>(m/z 1700)                       | ESI                | NA                   | NA                        | Profinder, STOFF-IDENT                                                                                                                           |
| Lab 20             | 100-1000   | 30,000<br>(m/z=956)                        | ESI                | CID                  | PeakView (MasterView)     | isotopic pattern, distribution, double bonds and rings, different chemical DBs (chemspider etc)                                                  |



**Table S4** Information about the GC-MS equipment and GC conditions used by the participants in the collaborative trial

| Lab    | Instrument and model                                               | Column <sup>a</sup>                | Dimensions                                                                 | Injection Volume  | Temperature program                                                                                                                                       | Carrier gas/flow (ml/min)                                                | IS <sup>b</sup>                               |
|--------|--------------------------------------------------------------------|------------------------------------|----------------------------------------------------------------------------|-------------------|-----------------------------------------------------------------------------------------------------------------------------------------------------------|--------------------------------------------------------------------------|-----------------------------------------------|
| Lab 1  | Agilent 7000A<br>GC-QQQ                                            | DB-PAH                             | 30 m, 0.25 mm, 0.15 µm                                                     | SSL<br>2 µL       | 50C (2min)-2.35C/min-310C (8 min)                                                                                                                         | He<br>1.0                                                                | D8-NAPH, D10-ACEN/PHEN, D12-PER/CRYS          |
| Lab 2  | EI: Leco Pegasus 4D<br>GC×GC-QTOF<br>CI: Agilent 7200B<br>GC-QTOF  | Rtx-5sil ms<br>BPX-50<br>DB-5ms UI | 30 m, 0.25 mm, 0.25 µm<br>2 m, 0.18 mm, 0.18 µm<br>30 m, 0.25 mm, 0.25 µm  | SSL<br>1 µL       | 35C (1 min)-4C/min-310C (3 min)<br>60C (1 min)-4C/min-335C (3 min)<br>90(1)-4C/min-310C (3 min)                                                           | He<br>1.0<br>He<br>0.8                                                   | D10-PHEN                                      |
| Lab 3  | Waters Xevo G2-XS<br>GC×GC-QTOF                                    | Rtx-5<br>Rtx-17                    | 60 m, 0.25 mm, 0.25 µm<br>1 m, 0.15 mm, 0.15 µm                            | SSL<br>1 µL       | 90C (2 min)-40C/min-200C-<br>2.8C/min-330C (5min)                                                                                                         | He<br>2.0                                                                | <sup>13</sup> C-PBDE mix                      |
| Lab 4  | Agilent 7200B<br>QTOF                                              | DB-5ms UI                          | 30 m, 0.25 mm, 0.25 µm                                                     | SSL<br>1 µL       | 35C(3 min)-4C/min-325 (3 min)                                                                                                                             | He<br>1.0                                                                | DBOFOB                                        |
| Lab 5  | Agilent 5795C<br>GC-MS                                             | DB-5ms                             | 30 m, 0.25 mm, 1.00 µm                                                     | LVI,<br>20 µL     | 50C (2min)-8C/min-320C (10 min)                                                                                                                           | H <sub>2</sub><br>1.8                                                    | D10-chlorpyrifos<br>D10-PHEN                  |
| Lab 7  | Agilent 7200 Q-TOF<br>GC 7890B                                     | HP-5MS UI                          | 30 m, 0.25 mm, 0.25 µm                                                     | PTV<br>1 µl       | 45(2 min)- 310°C                                                                                                                                          | He<br>1.2                                                                | -                                             |
| Lab 8  | Agilent 7200<br>GC-QTOF                                            | DB-5ms                             | 30 m, 0.25 mm, 0.25 µm                                                     | SSL<br>1 µL       | 40C (1 min)-5C/min-310C (25 min)                                                                                                                          | He<br>1.0                                                                | D14-Terphenyl                                 |
| Lab 9  | Agilent 5793<br>GC-MS                                              | EI: ZB-volatiles<br>NCI: Rxi-PAH   | 30 m, 0.25 mm, 0.50 µm<br>30 m, 0.25 mm, 0.1 µm                            | PTV<br>1 µL       | EI: 40C (5 min)-5C/min-320C (5 min)<br>NCI: 70C (5 min)-45C/min-190C-<br>5C/min-320 (5 min)                                                               | He<br>1.2                                                                | Deuterated mix: nitro-PAH and quinone-<br>PAH |
| Lab 10 | Xevo G2, GC-QTOF<br>Shimadzu 2010, GC-MS<br><br>Waters TSQ, GC-QQQ | DB-5ms<br>DB-5ms<br>DB-HT1         | 30 m, 0.25 mm, 0.25 µm<br>30 m, 0.25 mm, 0.25 µm<br>15 m, 0.25 mm, 0.10 µm | SSL<br>1 µL       | 90C (0 min)-5C/min-315C (4 min)<br>60C (3 min)-10C/min-240C-30C/min-<br>320 (5 min)<br>140C (1 min)-10C/min-200C-<br>20C/min-300C-40C/min-350C<br>(1 min) | H <sub>2</sub> , 2.0<br>H <sub>2</sub> , 2.0<br><br>H <sub>2</sub> , 4.0 | D8-DDT                                        |
| Lab 13 | Agilent 7200<br>GC-QTOF                                            | HP-5ms                             | 30 m, 0.25 mm, 0.25 µm                                                     | SSL<br>1 µL       | 90C (2 min)-20C/min-200C-5C/min-<br>290C (32 min)                                                                                                         | He<br>1.0                                                                | -                                             |
| Lab 16 | Agilent 7200<br>GC-QTOF                                            | Rtx-1614                           | 30 m, 0.25 mm, 0.10 µm                                                     | SSL<br>1 µL       | 50C (2 min)-2C/min- 310C (10 min)                                                                                                                         | He<br>1.0                                                                | -                                             |
| Lab 17 | GC-Q Exactive<br>GC-Orbitrap                                       | TG-5sil-ms                         | 30 m, 0.25 mm, 0.25 µm                                                     | SSL<br>1 µL       | 80C (1 min)-7C/min-310C (2 min)                                                                                                                           | He<br>1.0                                                                | -                                             |
| Lab 18 | Agilent 7000C<br>GC-QQQ                                            | DB-5ms                             | 15 m, 0.25 mm, 0.10 µm                                                     | On-column<br>2 µL | 100°C (1 min)-10°C/min-310°C<br>(10 min)                                                                                                                  | He<br>1.0                                                                | <sup>13</sup> C-PBDE mix                      |
| Lab 20 | Thermo TSQ<br>GC-QQQ                                               | DB-5ms                             | 30 m, 0.25 mm, 0.25 µm                                                     | SSL<br>1 µL       | 80C (2 min)-20C/min-180C-10C/min-<br>300C (10 min)                                                                                                        | H <sub>2</sub><br>1.0                                                    | DCDD                                          |

<sup>a</sup> Column manufactures: DB: J&W, HP: Agilent, Rtx: Restek, BPX: SGE, TG: Thermo, ZB: Phenomenex,

Abbreviations: PHEN: Phenanthrene, ACEN: Acenaphthalene, Per: Perylene, CRY: Crysene, DBOFB: 4,4'-dibromo-octafluorobiphenyl.

**Table S5** Information about the MS conditions and workflows used by the GC-MS participants in the collaborative trial

| Lab    | Mass Range                                    | Resolution,<br>mass<br>accuracy | Ionization                                | Target Software                      | Suspect, NT procedure                                                                                                                                                                                          | RI mixture       |
|--------|-----------------------------------------------|---------------------------------|-------------------------------------------|--------------------------------------|----------------------------------------------------------------------------------------------------------------------------------------------------------------------------------------------------------------|------------------|
| Lab 1  | 50-600                                        | Unit                            | EI                                        | Mass Hunter                          | Mass Hunter, manual interpretation                                                                                                                                                                             | Yes              |
| Lab 2  | 29-750<br>30-1000                             | Unit<br>12,000<br>5 ppm         | EI<br>CI(-)                               | -<br>-                               | ChromaTOF, NIST14, manual interpretation, RI matching, RT correlation, Chempider<br>Masshunter, Br <sup>-</sup> and Cl <sup>-</sup> detection, full-spectrum extraction, manual review, RI matching, Chempider | Yes              |
| Lab 3  | 50-1200                                       | 25,000<br>5 ppm                 | APCI(+)<br>APCI(-)                        | -                                    | GCImage v2.5                                                                                                                                                                                                   | No               |
| Lab 4  | 50-1050                                       | 8,400<br>15 ppm                 | EI                                        | Mass Hunter Quantitative             | Masshunter Qualitative incl. Unknown Analysis, RI matching                                                                                                                                                     | Yes              |
| Lab 5  | 45-800                                        | Unit                            | EI, CI(+) and<br>CI(-) (CH <sub>4</sub> ) | Chemstation, Amdis,<br>NIST14        | Library search, RI matching, manual interpretation                                                                                                                                                             | Yes              |
| Lab 7  | 50-1000                                       | 2ppm, 16-<br>17000<br>FWHM      | EI                                        | Mass Hunter Quantitative             | Mass Hunter Unknown Analysis, Library Search (NIST 17, Agilent Pesticides), manual interpretation, RI matching                                                                                                 | Yes              |
| Lab 8  | 50-750                                        | 10,000<br>5 ppm                 | EI                                        | Mass Hunter                          | Mass Hunter, manual interpretation                                                                                                                                                                             | Yes              |
| Lab 9  | EI: 50-800<br>NCI: 50-400                     | Unit                            | EI,<br>CI(-)                              | Chemstation                          | Chemstation, Amdis, NIST11                                                                                                                                                                                     | Yes              |
| Lab 10 | QTOF: 50-650<br>GC-MSD: 50-650<br>GC-QQQ: MRM | 12,000<br>Unit<br>Unit          | APCI<br>EI<br>APCI                        | Chromalynx, Shimadzu<br>GCMSsolution | Chromalynx, PARAFAC, NIST search, manual interpretation                                                                                                                                                        | Yes              |
| Lab 13 | 50-1000                                       | 8,000<br>20 ppm                 | EI                                        | -                                    | Masshunter, NIST                                                                                                                                                                                               | Yes              |
| Lab 16 | 50-1000                                       | 8,000<br>10 ppm                 | EI                                        | -                                    | Masshunter Qualitative incl. Unknown Analysis, NIST, manual interpretation                                                                                                                                     | Yes              |
| Lab 17 | 66-1000                                       | 60,000<br>10 ppm                | EI                                        | Tracefinder,<br>In-house library     | -                                                                                                                                                                                                              | No               |
| Lab 18 | MRM                                           | Unit                            | EI                                        | Mass Hunter Quant                    | -                                                                                                                                                                                                              | Yes<br>(C16-C30) |
| Lab 20 | 50-700                                        | Unit                            | EI                                        | -                                    | NIST search                                                                                                                                                                                                    | Yes              |

**Table S6** Practical application of RTI for improving identification of emerging pollutants

| No. | multiple comparison procedure plot                                                                                                                                                                                                                                        | RTI details                                                                                                                                                                                                                                                                                                                                                                                                                                                                                                                                                                                                                                                                                                                                                                                                                                                                                                                                                                                                                                                                                                                                                                                                                                                                                                                                                                                                                                                                                                                                                                                                                                                                                                                                                                                                  |                                    |                                    |                           |           |           |                    |                    |      |       |   |       |        |        |      |     |   |       |      |      |      |      |      |      |      |       |   |       |        |        |      |     |   |        |    |       |        |        |      |     |   |        |   |       |        |        |      |     |   |        |   |      |        |        |      |     |   |       |   |       |        |        |      |     |   |       |   |       |        |        |      |     |   |        |   |       |        |        |      |     |   |        |      |      |      |      |      |      |      |        |   |       |        |        |      |     |   |       |   |       |        |        |      |     |   |                                                                                                                                                                                                                                                                                                                                                                                                                                                                                                                                                                                                                                                          |
|-----|---------------------------------------------------------------------------------------------------------------------------------------------------------------------------------------------------------------------------------------------------------------------------|--------------------------------------------------------------------------------------------------------------------------------------------------------------------------------------------------------------------------------------------------------------------------------------------------------------------------------------------------------------------------------------------------------------------------------------------------------------------------------------------------------------------------------------------------------------------------------------------------------------------------------------------------------------------------------------------------------------------------------------------------------------------------------------------------------------------------------------------------------------------------------------------------------------------------------------------------------------------------------------------------------------------------------------------------------------------------------------------------------------------------------------------------------------------------------------------------------------------------------------------------------------------------------------------------------------------------------------------------------------------------------------------------------------------------------------------------------------------------------------------------------------------------------------------------------------------------------------------------------------------------------------------------------------------------------------------------------------------------------------------------------------------------------------------------------------|------------------------------------|------------------------------------|---------------------------|-----------|-----------|--------------------|--------------------|------|-------|---|-------|--------|--------|------|-----|---|-------|------|------|------|------|------|------|------|-------|---|-------|--------|--------|------|-----|---|--------|----|-------|--------|--------|------|-----|---|--------|---|-------|--------|--------|------|-----|---|--------|---|------|--------|--------|------|-----|---|-------|---|-------|--------|--------|------|-----|---|-------|---|-------|--------|--------|------|-----|---|--------|---|-------|--------|--------|------|-----|---|--------|------|------|------|------|------|------|------|--------|---|-------|--------|--------|------|-----|---|-------|---|-------|--------|--------|------|-----|---|----------------------------------------------------------------------------------------------------------------------------------------------------------------------------------------------------------------------------------------------------------------------------------------------------------------------------------------------------------------------------------------------------------------------------------------------------------------------------------------------------------------------------------------------------------------------------------------------------------------------------------------------------------|
| (1) | <p style="text-align: center;"><b>Comparison of Exp. RTI values: Triphenylphosphate</b></p> 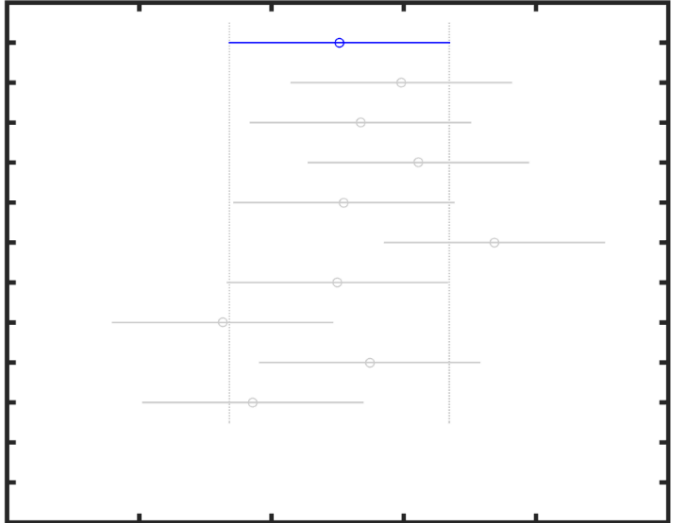 <p style="text-align: center;">No groups have means significantly different from Lab 06</p> | <table border="1"> <thead> <tr> <th>Institute</th> <th>Level of identification confidence</th> <th>Exp. t<sub>R</sub> (min)</th> <th>Exp. RTI</th> <th>Pred. RTI</th> <th>ESI mode</th> <th>Application domain</th> <th>MCP*</th> </tr> </thead> <tbody> <tr> <td>Lab 6</td> <td>1</td> <td>11.15</td> <td>751.27</td> <td>740.51</td> <td>+ESI</td> <td>AD1</td> <td>a</td> </tr> <tr> <td>Lab 5</td> <td>N.D.</td> <td>N.D.</td> <td>N.D.</td> <td>N.D.</td> <td>N.D.</td> <td>N.D.</td> <td>N.D.</td> </tr> <tr> <td>Lab 4</td> <td>2</td> <td>13.85</td> <td>776.40</td> <td>740.51</td> <td>+ESI</td> <td>AD1</td> <td>a</td> </tr> <tr> <td>Lab 12</td> <td>2a</td> <td>7.426</td> <td>767.26</td> <td>740.51</td> <td>+ESI</td> <td>AD1</td> <td>a</td> </tr> <tr> <td>Lab 13</td> <td>3</td> <td>21.58</td> <td>811.13</td> <td>740.51</td> <td>+ESI</td> <td>AD1</td> <td>a</td> </tr> <tr> <td>Lab 15</td> <td>1</td> <td>9.11</td> <td>754.82</td> <td>740.51</td> <td>+ESI</td> <td>AD1</td> <td>a</td> </tr> <tr> <td>Lab 9</td> <td>2</td> <td>14.96</td> <td>848.45</td> <td>740.51</td> <td>+ESI</td> <td>AD2</td> <td>a</td> </tr> <tr> <td>Lab 2</td> <td>1</td> <td>33.42</td> <td>749.83</td> <td>740.51</td> <td>+ESI</td> <td>AD1</td> <td>a</td> </tr> <tr> <td>Lab 18</td> <td>1</td> <td>14.91</td> <td>663.04</td> <td>740.51</td> <td>+ESI</td> <td>AD1</td> <td>a</td> </tr> <tr> <td>Lab 17</td> <td>N.D.</td> <td>N.D.</td> <td>N.D.</td> <td>N.D.</td> <td>N.D.</td> <td>N.D.</td> <td>N.D.</td> </tr> <tr> <td>Lab 10</td> <td>2</td> <td>12.52</td> <td>774.28</td> <td>740.51</td> <td>+ESI</td> <td>AD1</td> <td>a</td> </tr> <tr> <td>Lab 7</td> <td>2</td> <td>16.67</td> <td>685.85</td> <td>740.51</td> <td>+ESI</td> <td>AD1</td> <td>a</td> </tr> </tbody> </table> | Institute                          | Level of identification confidence | Exp. t <sub>R</sub> (min) | Exp. RTI  | Pred. RTI | ESI mode           | Application domain | MCP* | Lab 6 | 1 | 11.15 | 751.27 | 740.51 | +ESI | AD1 | a | Lab 5 | N.D. | N.D. | N.D. | N.D. | N.D. | N.D. | N.D. | Lab 4 | 2 | 13.85 | 776.40 | 740.51 | +ESI | AD1 | a | Lab 12 | 2a | 7.426 | 767.26 | 740.51 | +ESI | AD1 | a | Lab 13 | 3 | 21.58 | 811.13 | 740.51 | +ESI | AD1 | a | Lab 15 | 1 | 9.11 | 754.82 | 740.51 | +ESI | AD1 | a | Lab 9 | 2 | 14.96 | 848.45 | 740.51 | +ESI | AD2 | a | Lab 2 | 1 | 33.42 | 749.83 | 740.51 | +ESI | AD1 | a | Lab 18 | 1 | 14.91 | 663.04 | 740.51 | +ESI | AD1 | a | Lab 17 | N.D. | N.D. | N.D. | N.D. | N.D. | N.D. | N.D. | Lab 10 | 2 | 12.52 | 774.28 | 740.51 | +ESI | AD1 | a | Lab 7 | 2 | 16.67 | 685.85 | 740.51 | +ESI | AD1 | a | <p>AD1: Exp. &amp; Pred. t<sub>R</sub> are accepted for this candidate (box1)<br/>                     AD2: Although there is error, exp. &amp; pred. t<sub>R</sub> are accepted for this candidate (box2)<br/>                     N.D.: Not detected.</p> <p>*MCP is multiple comparison procedure; the difference in exp. RTI values is encoded as letter (RTI values are significantly different if they have different letters (e.g. "a" vs "b"))<br/>                     All institutes have acceptable exp. RTI values and the difference is <b>not significant at 99% CIs</b> of the calibration curve. <b>Promote "Lab 13" to level 2!</b></p> |
|     |                                                                                                                                                                                                                                                                           | Institute                                                                                                                                                                                                                                                                                                                                                                                                                                                                                                                                                                                                                                                                                                                                                                                                                                                                                                                                                                                                                                                                                                                                                                                                                                                                                                                                                                                                                                                                                                                                                                                                                                                                                                                                                                                                    | Level of identification confidence | Exp. t <sub>R</sub> (min)          | Exp. RTI                  | Pred. RTI | ESI mode  | Application domain | MCP*               |      |       |   |       |        |        |      |     |   |       |      |      |      |      |      |      |      |       |   |       |        |        |      |     |   |        |    |       |        |        |      |     |   |        |   |       |        |        |      |     |   |        |   |      |        |        |      |     |   |       |   |       |        |        |      |     |   |       |   |       |        |        |      |     |   |        |   |       |        |        |      |     |   |        |      |      |      |      |      |      |      |        |   |       |        |        |      |     |   |       |   |       |        |        |      |     |   |                                                                                                                                                                                                                                                                                                                                                                                                                                                                                                                                                                                                                                                          |
|     |                                                                                                                                                                                                                                                                           | Lab 6                                                                                                                                                                                                                                                                                                                                                                                                                                                                                                                                                                                                                                                                                                                                                                                                                                                                                                                                                                                                                                                                                                                                                                                                                                                                                                                                                                                                                                                                                                                                                                                                                                                                                                                                                                                                        | 1                                  | 11.15                              | 751.27                    | 740.51    | +ESI      | AD1                | a                  |      |       |   |       |        |        |      |     |   |       |      |      |      |      |      |      |      |       |   |       |        |        |      |     |   |        |    |       |        |        |      |     |   |        |   |       |        |        |      |     |   |        |   |      |        |        |      |     |   |       |   |       |        |        |      |     |   |       |   |       |        |        |      |     |   |        |   |       |        |        |      |     |   |        |      |      |      |      |      |      |      |        |   |       |        |        |      |     |   |       |   |       |        |        |      |     |   |                                                                                                                                                                                                                                                                                                                                                                                                                                                                                                                                                                                                                                                          |
|     |                                                                                                                                                                                                                                                                           | Lab 5                                                                                                                                                                                                                                                                                                                                                                                                                                                                                                                                                                                                                                                                                                                                                                                                                                                                                                                                                                                                                                                                                                                                                                                                                                                                                                                                                                                                                                                                                                                                                                                                                                                                                                                                                                                                        | N.D.                               | N.D.                               | N.D.                      | N.D.      | N.D.      | N.D.               | N.D.               |      |       |   |       |        |        |      |     |   |       |      |      |      |      |      |      |      |       |   |       |        |        |      |     |   |        |    |       |        |        |      |     |   |        |   |       |        |        |      |     |   |        |   |      |        |        |      |     |   |       |   |       |        |        |      |     |   |       |   |       |        |        |      |     |   |        |   |       |        |        |      |     |   |        |      |      |      |      |      |      |      |        |   |       |        |        |      |     |   |       |   |       |        |        |      |     |   |                                                                                                                                                                                                                                                                                                                                                                                                                                                                                                                                                                                                                                                          |
|     |                                                                                                                                                                                                                                                                           | Lab 4                                                                                                                                                                                                                                                                                                                                                                                                                                                                                                                                                                                                                                                                                                                                                                                                                                                                                                                                                                                                                                                                                                                                                                                                                                                                                                                                                                                                                                                                                                                                                                                                                                                                                                                                                                                                        | 2                                  | 13.85                              | 776.40                    | 740.51    | +ESI      | AD1                | a                  |      |       |   |       |        |        |      |     |   |       |      |      |      |      |      |      |      |       |   |       |        |        |      |     |   |        |    |       |        |        |      |     |   |        |   |       |        |        |      |     |   |        |   |      |        |        |      |     |   |       |   |       |        |        |      |     |   |       |   |       |        |        |      |     |   |        |   |       |        |        |      |     |   |        |      |      |      |      |      |      |      |        |   |       |        |        |      |     |   |       |   |       |        |        |      |     |   |                                                                                                                                                                                                                                                                                                                                                                                                                                                                                                                                                                                                                                                          |
|     |                                                                                                                                                                                                                                                                           | Lab 12                                                                                                                                                                                                                                                                                                                                                                                                                                                                                                                                                                                                                                                                                                                                                                                                                                                                                                                                                                                                                                                                                                                                                                                                                                                                                                                                                                                                                                                                                                                                                                                                                                                                                                                                                                                                       | 2a                                 | 7.426                              | 767.26                    | 740.51    | +ESI      | AD1                | a                  |      |       |   |       |        |        |      |     |   |       |      |      |      |      |      |      |      |       |   |       |        |        |      |     |   |        |    |       |        |        |      |     |   |        |   |       |        |        |      |     |   |        |   |      |        |        |      |     |   |       |   |       |        |        |      |     |   |       |   |       |        |        |      |     |   |        |   |       |        |        |      |     |   |        |      |      |      |      |      |      |      |        |   |       |        |        |      |     |   |       |   |       |        |        |      |     |   |                                                                                                                                                                                                                                                                                                                                                                                                                                                                                                                                                                                                                                                          |
|     |                                                                                                                                                                                                                                                                           | Lab 13                                                                                                                                                                                                                                                                                                                                                                                                                                                                                                                                                                                                                                                                                                                                                                                                                                                                                                                                                                                                                                                                                                                                                                                                                                                                                                                                                                                                                                                                                                                                                                                                                                                                                                                                                                                                       | 3                                  | 21.58                              | 811.13                    | 740.51    | +ESI      | AD1                | a                  |      |       |   |       |        |        |      |     |   |       |      |      |      |      |      |      |      |       |   |       |        |        |      |     |   |        |    |       |        |        |      |     |   |        |   |       |        |        |      |     |   |        |   |      |        |        |      |     |   |       |   |       |        |        |      |     |   |       |   |       |        |        |      |     |   |        |   |       |        |        |      |     |   |        |      |      |      |      |      |      |      |        |   |       |        |        |      |     |   |       |   |       |        |        |      |     |   |                                                                                                                                                                                                                                                                                                                                                                                                                                                                                                                                                                                                                                                          |
|     |                                                                                                                                                                                                                                                                           | Lab 15                                                                                                                                                                                                                                                                                                                                                                                                                                                                                                                                                                                                                                                                                                                                                                                                                                                                                                                                                                                                                                                                                                                                                                                                                                                                                                                                                                                                                                                                                                                                                                                                                                                                                                                                                                                                       | 1                                  | 9.11                               | 754.82                    | 740.51    | +ESI      | AD1                | a                  |      |       |   |       |        |        |      |     |   |       |      |      |      |      |      |      |      |       |   |       |        |        |      |     |   |        |    |       |        |        |      |     |   |        |   |       |        |        |      |     |   |        |   |      |        |        |      |     |   |       |   |       |        |        |      |     |   |       |   |       |        |        |      |     |   |        |   |       |        |        |      |     |   |        |      |      |      |      |      |      |      |        |   |       |        |        |      |     |   |       |   |       |        |        |      |     |   |                                                                                                                                                                                                                                                                                                                                                                                                                                                                                                                                                                                                                                                          |
|     |                                                                                                                                                                                                                                                                           | Lab 9                                                                                                                                                                                                                                                                                                                                                                                                                                                                                                                                                                                                                                                                                                                                                                                                                                                                                                                                                                                                                                                                                                                                                                                                                                                                                                                                                                                                                                                                                                                                                                                                                                                                                                                                                                                                        | 2                                  | 14.96                              | 848.45                    | 740.51    | +ESI      | AD2                | a                  |      |       |   |       |        |        |      |     |   |       |      |      |      |      |      |      |      |       |   |       |        |        |      |     |   |        |    |       |        |        |      |     |   |        |   |       |        |        |      |     |   |        |   |      |        |        |      |     |   |       |   |       |        |        |      |     |   |       |   |       |        |        |      |     |   |        |   |       |        |        |      |     |   |        |      |      |      |      |      |      |      |        |   |       |        |        |      |     |   |       |   |       |        |        |      |     |   |                                                                                                                                                                                                                                                                                                                                                                                                                                                                                                                                                                                                                                                          |
|     |                                                                                                                                                                                                                                                                           | Lab 2                                                                                                                                                                                                                                                                                                                                                                                                                                                                                                                                                                                                                                                                                                                                                                                                                                                                                                                                                                                                                                                                                                                                                                                                                                                                                                                                                                                                                                                                                                                                                                                                                                                                                                                                                                                                        | 1                                  | 33.42                              | 749.83                    | 740.51    | +ESI      | AD1                | a                  |      |       |   |       |        |        |      |     |   |       |      |      |      |      |      |      |      |       |   |       |        |        |      |     |   |        |    |       |        |        |      |     |   |        |   |       |        |        |      |     |   |        |   |      |        |        |      |     |   |       |   |       |        |        |      |     |   |       |   |       |        |        |      |     |   |        |   |       |        |        |      |     |   |        |      |      |      |      |      |      |      |        |   |       |        |        |      |     |   |       |   |       |        |        |      |     |   |                                                                                                                                                                                                                                                                                                                                                                                                                                                                                                                                                                                                                                                          |
|     |                                                                                                                                                                                                                                                                           | Lab 18                                                                                                                                                                                                                                                                                                                                                                                                                                                                                                                                                                                                                                                                                                                                                                                                                                                                                                                                                                                                                                                                                                                                                                                                                                                                                                                                                                                                                                                                                                                                                                                                                                                                                                                                                                                                       | 1                                  | 14.91                              | 663.04                    | 740.51    | +ESI      | AD1                | a                  |      |       |   |       |        |        |      |     |   |       |      |      |      |      |      |      |      |       |   |       |        |        |      |     |   |        |    |       |        |        |      |     |   |        |   |       |        |        |      |     |   |        |   |      |        |        |      |     |   |       |   |       |        |        |      |     |   |       |   |       |        |        |      |     |   |        |   |       |        |        |      |     |   |        |      |      |      |      |      |      |      |        |   |       |        |        |      |     |   |       |   |       |        |        |      |     |   |                                                                                                                                                                                                                                                                                                                                                                                                                                                                                                                                                                                                                                                          |
|     |                                                                                                                                                                                                                                                                           | Lab 17                                                                                                                                                                                                                                                                                                                                                                                                                                                                                                                                                                                                                                                                                                                                                                                                                                                                                                                                                                                                                                                                                                                                                                                                                                                                                                                                                                                                                                                                                                                                                                                                                                                                                                                                                                                                       | N.D.                               | N.D.                               | N.D.                      | N.D.      | N.D.      | N.D.               | N.D.               |      |       |   |       |        |        |      |     |   |       |      |      |      |      |      |      |      |       |   |       |        |        |      |     |   |        |    |       |        |        |      |     |   |        |   |       |        |        |      |     |   |        |   |      |        |        |      |     |   |       |   |       |        |        |      |     |   |       |   |       |        |        |      |     |   |        |   |       |        |        |      |     |   |        |      |      |      |      |      |      |      |        |   |       |        |        |      |     |   |       |   |       |        |        |      |     |   |                                                                                                                                                                                                                                                                                                                                                                                                                                                                                                                                                                                                                                                          |
|     |                                                                                                                                                                                                                                                                           | Lab 10                                                                                                                                                                                                                                                                                                                                                                                                                                                                                                                                                                                                                                                                                                                                                                                                                                                                                                                                                                                                                                                                                                                                                                                                                                                                                                                                                                                                                                                                                                                                                                                                                                                                                                                                                                                                       | 2                                  | 12.52                              | 774.28                    | 740.51    | +ESI      | AD1                | a                  |      |       |   |       |        |        |      |     |   |       |      |      |      |      |      |      |      |       |   |       |        |        |      |     |   |        |    |       |        |        |      |     |   |        |   |       |        |        |      |     |   |        |   |      |        |        |      |     |   |       |   |       |        |        |      |     |   |       |   |       |        |        |      |     |   |        |   |       |        |        |      |     |   |        |      |      |      |      |      |      |      |        |   |       |        |        |      |     |   |       |   |       |        |        |      |     |   |                                                                                                                                                                                                                                                                                                                                                                                                                                                                                                                                                                                                                                                          |
|     |                                                                                                                                                                                                                                                                           | Lab 7                                                                                                                                                                                                                                                                                                                                                                                                                                                                                                                                                                                                                                                                                                                                                                                                                                                                                                                                                                                                                                                                                                                                                                                                                                                                                                                                                                                                                                                                                                                                                                                                                                                                                                                                                                                                        | 2                                  | 16.67                              | 685.85                    | 740.51    | +ESI      | AD1                | a                  |      |       |   |       |        |        |      |     |   |       |      |      |      |      |      |      |      |       |   |       |        |        |      |     |   |        |    |       |        |        |      |     |   |        |   |       |        |        |      |     |   |        |   |      |        |        |      |     |   |       |   |       |        |        |      |     |   |       |   |       |        |        |      |     |   |        |   |       |        |        |      |     |   |        |      |      |      |      |      |      |      |        |   |       |        |        |      |     |   |       |   |       |        |        |      |     |   |                                                                                                                                                                                                                                                                                                                                                                                                                                                                                                                                                                                                                                                          |

| No.       | multiple comparison procedure plot                                                                                                                                                          | RTI details                                                                                                                                                                                                                                                                                                                                                                                                                                                                                                                                                                                                                                                                                                                                                                                                                                                                                                                                                                                                                                                                                                                                                                                                                                                                                                                                                                                                                                                                                                                                                                                                                                                                                                                                                                                                                                                                                                                                                                                                                                                                                                   |           |                                    |                  |                    |           |          |                    |     |       |   |       |        |        |      |     |   |       |      |      |      |      |      |      |      |       |   |       |        |        |      |     |   |        |      |      |        |        |      |      |      |        |      |       |        |        |      |      |      |        |   |      |        |        |      |     |   |       |      |       |        |        |      |      |      |       |   |       |        |        |      |     |   |        |      |      |      |      |      |      |      |        |      |       |        |        |      |      |      |        |      |       |        |        |      |      |      |       |   |       |        |        |      |     |   |
|-----------|---------------------------------------------------------------------------------------------------------------------------------------------------------------------------------------------|---------------------------------------------------------------------------------------------------------------------------------------------------------------------------------------------------------------------------------------------------------------------------------------------------------------------------------------------------------------------------------------------------------------------------------------------------------------------------------------------------------------------------------------------------------------------------------------------------------------------------------------------------------------------------------------------------------------------------------------------------------------------------------------------------------------------------------------------------------------------------------------------------------------------------------------------------------------------------------------------------------------------------------------------------------------------------------------------------------------------------------------------------------------------------------------------------------------------------------------------------------------------------------------------------------------------------------------------------------------------------------------------------------------------------------------------------------------------------------------------------------------------------------------------------------------------------------------------------------------------------------------------------------------------------------------------------------------------------------------------------------------------------------------------------------------------------------------------------------------------------------------------------------------------------------------------------------------------------------------------------------------------------------------------------------------------------------------------------------------|-----------|------------------------------------|------------------|--------------------|-----------|----------|--------------------|-----|-------|---|-------|--------|--------|------|-----|---|-------|------|------|------|------|------|------|------|-------|---|-------|--------|--------|------|-----|---|--------|------|------|--------|--------|------|------|------|--------|------|-------|--------|--------|------|------|------|--------|---|------|--------|--------|------|-----|---|-------|------|-------|--------|--------|------|------|------|-------|---|-------|--------|--------|------|-----|---|--------|------|------|------|------|------|------|------|--------|------|-------|--------|--------|------|------|------|--------|------|-------|--------|--------|------|------|------|-------|---|-------|--------|--------|------|-----|---|
| (2)       | <p style="text-align: center;"><b>Comparison of Exp. RTI values: Diclofenac</b></p> <p style="text-align: center;">No groups have means significantly different from Lab 06</p>             | <table border="1"> <thead> <tr> <th>Institute</th> <th>Level of identification confidence</th> <th>Exp. <math>t_R</math> (min)</th> <th>Exp. RTI</th> <th>Pred. RTI</th> <th>ESI mode</th> <th>Application domain</th> <th>MCP</th> </tr> </thead> <tbody> <tr><td>Lab 6</td><td>1</td><td>10.54</td><td>705.44</td><td>725.40</td><td>+ESI</td><td>AD1</td><td>a</td></tr> <tr><td>Lab 5</td><td>N.D.</td><td>N.D.</td><td>N.D.</td><td>N.D.</td><td>N.D.</td><td>N.D.</td><td>N.D.</td></tr> <tr><td>Lab 4</td><td>2</td><td>12.42</td><td>687.24</td><td>725.40</td><td>+ESI</td><td>AD1</td><td>a</td></tr> <tr><td>Lab 12</td><td>2a</td><td>6.58</td><td>673.92</td><td>725.40</td><td>+ESI</td><td>AD1</td><td>a</td></tr> <tr><td>Lab 13</td><td>N.D.</td><td>N.D.</td><td>N.D.</td><td>N.D.</td><td>N.D.</td><td>N.D.</td><td>N.D.</td></tr> <tr><td>Lab 15</td><td>1</td><td>8.81</td><td>729.63</td><td>725.40</td><td>+ESI</td><td>AD1</td><td>a</td></tr> <tr><td>Lab 9</td><td>1</td><td>11.54</td><td>619.67</td><td>725.40</td><td>+ESI</td><td>AD2</td><td>a</td></tr> <tr><td>Lab 2</td><td>2</td><td>31.01</td><td>700.98</td><td>725.40</td><td>+ESI</td><td>AD1</td><td>a</td></tr> <tr><td>Lab 18</td><td>N.D.</td><td>N.D.</td><td>N.D.</td><td>N.D.</td><td>N.D.</td><td>N.D.</td><td>N.D.</td></tr> <tr><td>Lab 17</td><td>1</td><td>12.55</td><td>706.78</td><td>725.40</td><td>+ESI</td><td>AD1</td><td>a</td></tr> <tr><td>Lab 10</td><td>1</td><td>12.01</td><td>741.98</td><td>725.40</td><td>+ESI</td><td>AD1</td><td>a</td></tr> <tr><td>Lab 7</td><td>2</td><td>18.11</td><td>761.20</td><td>725.40</td><td>+ESI</td><td>AD1</td><td>a</td></tr> </tbody> </table> <p>AD1: Exp. &amp; Pred. <math>t_R</math> are accepted for this candidate (box1)<br/> AD2: Although there is error, exp. &amp; pred. <math>t_R</math> are accepted for this candidate (box2)<br/> N.D.: Not detected.<br/> All institutes have acceptable exp. RTI values and the difference is <b>not significant at 99% CIs</b> of the calibration curve.</p>                                           | Institute | Level of identification confidence | Exp. $t_R$ (min) | Exp. RTI           | Pred. RTI | ESI mode | Application domain | MCP | Lab 6 | 1 | 10.54 | 705.44 | 725.40 | +ESI | AD1 | a | Lab 5 | N.D. | N.D. | N.D. | N.D. | N.D. | N.D. | N.D. | Lab 4 | 2 | 12.42 | 687.24 | 725.40 | +ESI | AD1 | a | Lab 12 | 2a   | 6.58 | 673.92 | 725.40 | +ESI | AD1  | a    | Lab 13 | N.D. | N.D.  | N.D.   | N.D.   | N.D. | N.D. | N.D. | Lab 15 | 1 | 8.81 | 729.63 | 725.40 | +ESI | AD1 | a | Lab 9 | 1    | 11.54 | 619.67 | 725.40 | +ESI | AD2  | a    | Lab 2 | 2 | 31.01 | 700.98 | 725.40 | +ESI | AD1 | a | Lab 18 | N.D. | N.D. | N.D. | N.D. | N.D. | N.D. | N.D. | Lab 17 | 1    | 12.55 | 706.78 | 725.40 | +ESI | AD1  | a    | Lab 10 | 1    | 12.01 | 741.98 | 725.40 | +ESI | AD1  | a    | Lab 7 | 2 | 18.11 | 761.20 | 725.40 | +ESI | AD1 | a |
| Institute | Level of identification confidence                                                                                                                                                          | Exp. $t_R$ (min)                                                                                                                                                                                                                                                                                                                                                                                                                                                                                                                                                                                                                                                                                                                                                                                                                                                                                                                                                                                                                                                                                                                                                                                                                                                                                                                                                                                                                                                                                                                                                                                                                                                                                                                                                                                                                                                                                                                                                                                                                                                                                              | Exp. RTI  | Pred. RTI                          | ESI mode         | Application domain | MCP       |          |                    |     |       |   |       |        |        |      |     |   |       |      |      |      |      |      |      |      |       |   |       |        |        |      |     |   |        |      |      |        |        |      |      |      |        |      |       |        |        |      |      |      |        |   |      |        |        |      |     |   |       |      |       |        |        |      |      |      |       |   |       |        |        |      |     |   |        |      |      |      |      |      |      |      |        |      |       |        |        |      |      |      |        |      |       |        |        |      |      |      |       |   |       |        |        |      |     |   |
| Lab 6     | 1                                                                                                                                                                                           | 10.54                                                                                                                                                                                                                                                                                                                                                                                                                                                                                                                                                                                                                                                                                                                                                                                                                                                                                                                                                                                                                                                                                                                                                                                                                                                                                                                                                                                                                                                                                                                                                                                                                                                                                                                                                                                                                                                                                                                                                                                                                                                                                                         | 705.44    | 725.40                             | +ESI             | AD1                | a         |          |                    |     |       |   |       |        |        |      |     |   |       |      |      |      |      |      |      |      |       |   |       |        |        |      |     |   |        |      |      |        |        |      |      |      |        |      |       |        |        |      |      |      |        |   |      |        |        |      |     |   |       |      |       |        |        |      |      |      |       |   |       |        |        |      |     |   |        |      |      |      |      |      |      |      |        |      |       |        |        |      |      |      |        |      |       |        |        |      |      |      |       |   |       |        |        |      |     |   |
| Lab 5     | N.D.                                                                                                                                                                                        | N.D.                                                                                                                                                                                                                                                                                                                                                                                                                                                                                                                                                                                                                                                                                                                                                                                                                                                                                                                                                                                                                                                                                                                                                                                                                                                                                                                                                                                                                                                                                                                                                                                                                                                                                                                                                                                                                                                                                                                                                                                                                                                                                                          | N.D.      | N.D.                               | N.D.             | N.D.               | N.D.      |          |                    |     |       |   |       |        |        |      |     |   |       |      |      |      |      |      |      |      |       |   |       |        |        |      |     |   |        |      |      |        |        |      |      |      |        |      |       |        |        |      |      |      |        |   |      |        |        |      |     |   |       |      |       |        |        |      |      |      |       |   |       |        |        |      |     |   |        |      |      |      |      |      |      |      |        |      |       |        |        |      |      |      |        |      |       |        |        |      |      |      |       |   |       |        |        |      |     |   |
| Lab 4     | 2                                                                                                                                                                                           | 12.42                                                                                                                                                                                                                                                                                                                                                                                                                                                                                                                                                                                                                                                                                                                                                                                                                                                                                                                                                                                                                                                                                                                                                                                                                                                                                                                                                                                                                                                                                                                                                                                                                                                                                                                                                                                                                                                                                                                                                                                                                                                                                                         | 687.24    | 725.40                             | +ESI             | AD1                | a         |          |                    |     |       |   |       |        |        |      |     |   |       |      |      |      |      |      |      |      |       |   |       |        |        |      |     |   |        |      |      |        |        |      |      |      |        |      |       |        |        |      |      |      |        |   |      |        |        |      |     |   |       |      |       |        |        |      |      |      |       |   |       |        |        |      |     |   |        |      |      |      |      |      |      |      |        |      |       |        |        |      |      |      |        |      |       |        |        |      |      |      |       |   |       |        |        |      |     |   |
| Lab 12    | 2a                                                                                                                                                                                          | 6.58                                                                                                                                                                                                                                                                                                                                                                                                                                                                                                                                                                                                                                                                                                                                                                                                                                                                                                                                                                                                                                                                                                                                                                                                                                                                                                                                                                                                                                                                                                                                                                                                                                                                                                                                                                                                                                                                                                                                                                                                                                                                                                          | 673.92    | 725.40                             | +ESI             | AD1                | a         |          |                    |     |       |   |       |        |        |      |     |   |       |      |      |      |      |      |      |      |       |   |       |        |        |      |     |   |        |      |      |        |        |      |      |      |        |      |       |        |        |      |      |      |        |   |      |        |        |      |     |   |       |      |       |        |        |      |      |      |       |   |       |        |        |      |     |   |        |      |      |      |      |      |      |      |        |      |       |        |        |      |      |      |        |      |       |        |        |      |      |      |       |   |       |        |        |      |     |   |
| Lab 13    | N.D.                                                                                                                                                                                        | N.D.                                                                                                                                                                                                                                                                                                                                                                                                                                                                                                                                                                                                                                                                                                                                                                                                                                                                                                                                                                                                                                                                                                                                                                                                                                                                                                                                                                                                                                                                                                                                                                                                                                                                                                                                                                                                                                                                                                                                                                                                                                                                                                          | N.D.      | N.D.                               | N.D.             | N.D.               | N.D.      |          |                    |     |       |   |       |        |        |      |     |   |       |      |      |      |      |      |      |      |       |   |       |        |        |      |     |   |        |      |      |        |        |      |      |      |        |      |       |        |        |      |      |      |        |   |      |        |        |      |     |   |       |      |       |        |        |      |      |      |       |   |       |        |        |      |     |   |        |      |      |      |      |      |      |      |        |      |       |        |        |      |      |      |        |      |       |        |        |      |      |      |       |   |       |        |        |      |     |   |
| Lab 15    | 1                                                                                                                                                                                           | 8.81                                                                                                                                                                                                                                                                                                                                                                                                                                                                                                                                                                                                                                                                                                                                                                                                                                                                                                                                                                                                                                                                                                                                                                                                                                                                                                                                                                                                                                                                                                                                                                                                                                                                                                                                                                                                                                                                                                                                                                                                                                                                                                          | 729.63    | 725.40                             | +ESI             | AD1                | a         |          |                    |     |       |   |       |        |        |      |     |   |       |      |      |      |      |      |      |      |       |   |       |        |        |      |     |   |        |      |      |        |        |      |      |      |        |      |       |        |        |      |      |      |        |   |      |        |        |      |     |   |       |      |       |        |        |      |      |      |       |   |       |        |        |      |     |   |        |      |      |      |      |      |      |      |        |      |       |        |        |      |      |      |        |      |       |        |        |      |      |      |       |   |       |        |        |      |     |   |
| Lab 9     | 1                                                                                                                                                                                           | 11.54                                                                                                                                                                                                                                                                                                                                                                                                                                                                                                                                                                                                                                                                                                                                                                                                                                                                                                                                                                                                                                                                                                                                                                                                                                                                                                                                                                                                                                                                                                                                                                                                                                                                                                                                                                                                                                                                                                                                                                                                                                                                                                         | 619.67    | 725.40                             | +ESI             | AD2                | a         |          |                    |     |       |   |       |        |        |      |     |   |       |      |      |      |      |      |      |      |       |   |       |        |        |      |     |   |        |      |      |        |        |      |      |      |        |      |       |        |        |      |      |      |        |   |      |        |        |      |     |   |       |      |       |        |        |      |      |      |       |   |       |        |        |      |     |   |        |      |      |      |      |      |      |      |        |      |       |        |        |      |      |      |        |      |       |        |        |      |      |      |       |   |       |        |        |      |     |   |
| Lab 2     | 2                                                                                                                                                                                           | 31.01                                                                                                                                                                                                                                                                                                                                                                                                                                                                                                                                                                                                                                                                                                                                                                                                                                                                                                                                                                                                                                                                                                                                                                                                                                                                                                                                                                                                                                                                                                                                                                                                                                                                                                                                                                                                                                                                                                                                                                                                                                                                                                         | 700.98    | 725.40                             | +ESI             | AD1                | a         |          |                    |     |       |   |       |        |        |      |     |   |       |      |      |      |      |      |      |      |       |   |       |        |        |      |     |   |        |      |      |        |        |      |      |      |        |      |       |        |        |      |      |      |        |   |      |        |        |      |     |   |       |      |       |        |        |      |      |      |       |   |       |        |        |      |     |   |        |      |      |      |      |      |      |      |        |      |       |        |        |      |      |      |        |      |       |        |        |      |      |      |       |   |       |        |        |      |     |   |
| Lab 18    | N.D.                                                                                                                                                                                        | N.D.                                                                                                                                                                                                                                                                                                                                                                                                                                                                                                                                                                                                                                                                                                                                                                                                                                                                                                                                                                                                                                                                                                                                                                                                                                                                                                                                                                                                                                                                                                                                                                                                                                                                                                                                                                                                                                                                                                                                                                                                                                                                                                          | N.D.      | N.D.                               | N.D.             | N.D.               | N.D.      |          |                    |     |       |   |       |        |        |      |     |   |       |      |      |      |      |      |      |      |       |   |       |        |        |      |     |   |        |      |      |        |        |      |      |      |        |      |       |        |        |      |      |      |        |   |      |        |        |      |     |   |       |      |       |        |        |      |      |      |       |   |       |        |        |      |     |   |        |      |      |      |      |      |      |      |        |      |       |        |        |      |      |      |        |      |       |        |        |      |      |      |       |   |       |        |        |      |     |   |
| Lab 17    | 1                                                                                                                                                                                           | 12.55                                                                                                                                                                                                                                                                                                                                                                                                                                                                                                                                                                                                                                                                                                                                                                                                                                                                                                                                                                                                                                                                                                                                                                                                                                                                                                                                                                                                                                                                                                                                                                                                                                                                                                                                                                                                                                                                                                                                                                                                                                                                                                         | 706.78    | 725.40                             | +ESI             | AD1                | a         |          |                    |     |       |   |       |        |        |      |     |   |       |      |      |      |      |      |      |      |       |   |       |        |        |      |     |   |        |      |      |        |        |      |      |      |        |      |       |        |        |      |      |      |        |   |      |        |        |      |     |   |       |      |       |        |        |      |      |      |       |   |       |        |        |      |     |   |        |      |      |      |      |      |      |      |        |      |       |        |        |      |      |      |        |      |       |        |        |      |      |      |       |   |       |        |        |      |     |   |
| Lab 10    | 1                                                                                                                                                                                           | 12.01                                                                                                                                                                                                                                                                                                                                                                                                                                                                                                                                                                                                                                                                                                                                                                                                                                                                                                                                                                                                                                                                                                                                                                                                                                                                                                                                                                                                                                                                                                                                                                                                                                                                                                                                                                                                                                                                                                                                                                                                                                                                                                         | 741.98    | 725.40                             | +ESI             | AD1                | a         |          |                    |     |       |   |       |        |        |      |     |   |       |      |      |      |      |      |      |      |       |   |       |        |        |      |     |   |        |      |      |        |        |      |      |      |        |      |       |        |        |      |      |      |        |   |      |        |        |      |     |   |       |      |       |        |        |      |      |      |       |   |       |        |        |      |     |   |        |      |      |      |      |      |      |      |        |      |       |        |        |      |      |      |        |      |       |        |        |      |      |      |       |   |       |        |        |      |     |   |
| Lab 7     | 2                                                                                                                                                                                           | 18.11                                                                                                                                                                                                                                                                                                                                                                                                                                                                                                                                                                                                                                                                                                                                                                                                                                                                                                                                                                                                                                                                                                                                                                                                                                                                                                                                                                                                                                                                                                                                                                                                                                                                                                                                                                                                                                                                                                                                                                                                                                                                                                         | 761.20    | 725.40                             | +ESI             | AD1                | a         |          |                    |     |       |   |       |        |        |      |     |   |       |      |      |      |      |      |      |      |       |   |       |        |        |      |     |   |        |      |      |        |        |      |      |      |        |      |       |        |        |      |      |      |        |   |      |        |        |      |     |   |       |      |       |        |        |      |      |      |       |   |       |        |        |      |     |   |        |      |      |      |      |      |      |      |        |      |       |        |        |      |      |      |        |      |       |        |        |      |      |      |       |   |       |        |        |      |     |   |
| (3)       | <p style="text-align: center;"><b>Comparison of Exp. RTI values: Butyl benzyl phthalate</b></p> <p style="text-align: center;">No groups have means significantly different from Lab 06</p> | <table border="1"> <thead> <tr> <th>Institute</th> <th>Level of identification confidence</th> <th>Exp. <math>t_R</math> (min)</th> <th>Exp. RTI</th> <th>Pred. RTI</th> <th>ESI mode</th> <th>Application domain</th> <th>MCP</th> </tr> </thead> <tbody> <tr><td>Lab 6</td><td>1</td><td>11.96</td><td>813.64</td><td>728.09</td><td>+ESI</td><td>AD1</td><td>a</td></tr> <tr><td>Lab 5</td><td>N.D.</td><td>N.D.</td><td>N.D.</td><td>N.D.</td><td>N.D.</td><td>N.D.</td><td>N.D.</td></tr> <tr><td>Lab 4</td><td>2</td><td>14.80</td><td>835.59</td><td>728.09</td><td>+ESI</td><td>AD2</td><td>a</td></tr> <tr><td>Lab 12</td><td>N.D.</td><td>N.D.</td><td>N.D.</td><td>N.D.</td><td>N.D.</td><td>N.D.</td><td>N.D.</td></tr> <tr><td>Lab 13</td><td>4</td><td>22.08</td><td>830.54</td><td>728.09</td><td>+ESI</td><td>AD2</td><td>a</td></tr> <tr><td>Lab 15</td><td>1</td><td>9.59</td><td>795.11</td><td>728.09</td><td>+ESI</td><td>AD1</td><td>a</td></tr> <tr><td>Lab 9</td><td>N.D.</td><td>N.D.</td><td>N.D.</td><td>N.D.</td><td>N.D.</td><td>N.D.</td><td>N.D.</td></tr> <tr><td>Lab 2</td><td>1</td><td>35.43</td><td>790.58</td><td>728.09</td><td>+ESI</td><td>AD1</td><td>a</td></tr> <tr><td>Lab 18</td><td>N.D.</td><td>N.D.</td><td>N.D.</td><td>N.D.</td><td>N.D.</td><td>N.D.</td><td>N.D.</td></tr> <tr><td>Lab 17</td><td>N.D.</td><td>N.D.</td><td>N.D.</td><td>N.D.</td><td>N.D.</td><td>N.D.</td><td>N.D.</td></tr> <tr><td>Lab 10</td><td>N.D.</td><td>N.D.</td><td>N.D.</td><td>N.D.</td><td>N.D.</td><td>N.D.</td><td>N.D.</td></tr> <tr><td>Lab 7</td><td>2</td><td>17.28</td><td>717.49</td><td>728.09</td><td>+ESI</td><td>AD1</td><td>a</td></tr> </tbody> </table> <p>AD1: Exp. &amp; Pred. <math>t_R</math> are accepted for this candidate (box1)<br/> AD2: Although there is error, exp. &amp; pred. <math>t_R</math> are accepted for this candidate (box2)<br/> N.D.: Not detected.<br/> All institutes have acceptable exp. RTI values and the difference is <b>not significant at 99% CIs</b> of the calibration curve. <b>Promote "Lab 13" to level 2!</b></p> | Institute | Level of identification confidence | Exp. $t_R$ (min) | Exp. RTI           | Pred. RTI | ESI mode | Application domain | MCP | Lab 6 | 1 | 11.96 | 813.64 | 728.09 | +ESI | AD1 | a | Lab 5 | N.D. | N.D. | N.D. | N.D. | N.D. | N.D. | N.D. | Lab 4 | 2 | 14.80 | 835.59 | 728.09 | +ESI | AD2 | a | Lab 12 | N.D. | N.D. | N.D.   | N.D.   | N.D. | N.D. | N.D. | Lab 13 | 4    | 22.08 | 830.54 | 728.09 | +ESI | AD2  | a    | Lab 15 | 1 | 9.59 | 795.11 | 728.09 | +ESI | AD1 | a | Lab 9 | N.D. | N.D.  | N.D.   | N.D.   | N.D. | N.D. | N.D. | Lab 2 | 1 | 35.43 | 790.58 | 728.09 | +ESI | AD1 | a | Lab 18 | N.D. | N.D. | N.D. | N.D. | N.D. | N.D. | N.D. | Lab 17 | N.D. | N.D.  | N.D.   | N.D.   | N.D. | N.D. | N.D. | Lab 10 | N.D. | N.D.  | N.D.   | N.D.   | N.D. | N.D. | N.D. | Lab 7 | 2 | 17.28 | 717.49 | 728.09 | +ESI | AD1 | a |
| Institute | Level of identification confidence                                                                                                                                                          | Exp. $t_R$ (min)                                                                                                                                                                                                                                                                                                                                                                                                                                                                                                                                                                                                                                                                                                                                                                                                                                                                                                                                                                                                                                                                                                                                                                                                                                                                                                                                                                                                                                                                                                                                                                                                                                                                                                                                                                                                                                                                                                                                                                                                                                                                                              | Exp. RTI  | Pred. RTI                          | ESI mode         | Application domain | MCP       |          |                    |     |       |   |       |        |        |      |     |   |       |      |      |      |      |      |      |      |       |   |       |        |        |      |     |   |        |      |      |        |        |      |      |      |        |      |       |        |        |      |      |      |        |   |      |        |        |      |     |   |       |      |       |        |        |      |      |      |       |   |       |        |        |      |     |   |        |      |      |      |      |      |      |      |        |      |       |        |        |      |      |      |        |      |       |        |        |      |      |      |       |   |       |        |        |      |     |   |
| Lab 6     | 1                                                                                                                                                                                           | 11.96                                                                                                                                                                                                                                                                                                                                                                                                                                                                                                                                                                                                                                                                                                                                                                                                                                                                                                                                                                                                                                                                                                                                                                                                                                                                                                                                                                                                                                                                                                                                                                                                                                                                                                                                                                                                                                                                                                                                                                                                                                                                                                         | 813.64    | 728.09                             | +ESI             | AD1                | a         |          |                    |     |       |   |       |        |        |      |     |   |       |      |      |      |      |      |      |      |       |   |       |        |        |      |     |   |        |      |      |        |        |      |      |      |        |      |       |        |        |      |      |      |        |   |      |        |        |      |     |   |       |      |       |        |        |      |      |      |       |   |       |        |        |      |     |   |        |      |      |      |      |      |      |      |        |      |       |        |        |      |      |      |        |      |       |        |        |      |      |      |       |   |       |        |        |      |     |   |
| Lab 5     | N.D.                                                                                                                                                                                        | N.D.                                                                                                                                                                                                                                                                                                                                                                                                                                                                                                                                                                                                                                                                                                                                                                                                                                                                                                                                                                                                                                                                                                                                                                                                                                                                                                                                                                                                                                                                                                                                                                                                                                                                                                                                                                                                                                                                                                                                                                                                                                                                                                          | N.D.      | N.D.                               | N.D.             | N.D.               | N.D.      |          |                    |     |       |   |       |        |        |      |     |   |       |      |      |      |      |      |      |      |       |   |       |        |        |      |     |   |        |      |      |        |        |      |      |      |        |      |       |        |        |      |      |      |        |   |      |        |        |      |     |   |       |      |       |        |        |      |      |      |       |   |       |        |        |      |     |   |        |      |      |      |      |      |      |      |        |      |       |        |        |      |      |      |        |      |       |        |        |      |      |      |       |   |       |        |        |      |     |   |
| Lab 4     | 2                                                                                                                                                                                           | 14.80                                                                                                                                                                                                                                                                                                                                                                                                                                                                                                                                                                                                                                                                                                                                                                                                                                                                                                                                                                                                                                                                                                                                                                                                                                                                                                                                                                                                                                                                                                                                                                                                                                                                                                                                                                                                                                                                                                                                                                                                                                                                                                         | 835.59    | 728.09                             | +ESI             | AD2                | a         |          |                    |     |       |   |       |        |        |      |     |   |       |      |      |      |      |      |      |      |       |   |       |        |        |      |     |   |        |      |      |        |        |      |      |      |        |      |       |        |        |      |      |      |        |   |      |        |        |      |     |   |       |      |       |        |        |      |      |      |       |   |       |        |        |      |     |   |        |      |      |      |      |      |      |      |        |      |       |        |        |      |      |      |        |      |       |        |        |      |      |      |       |   |       |        |        |      |     |   |
| Lab 12    | N.D.                                                                                                                                                                                        | N.D.                                                                                                                                                                                                                                                                                                                                                                                                                                                                                                                                                                                                                                                                                                                                                                                                                                                                                                                                                                                                                                                                                                                                                                                                                                                                                                                                                                                                                                                                                                                                                                                                                                                                                                                                                                                                                                                                                                                                                                                                                                                                                                          | N.D.      | N.D.                               | N.D.             | N.D.               | N.D.      |          |                    |     |       |   |       |        |        |      |     |   |       |      |      |      |      |      |      |      |       |   |       |        |        |      |     |   |        |      |      |        |        |      |      |      |        |      |       |        |        |      |      |      |        |   |      |        |        |      |     |   |       |      |       |        |        |      |      |      |       |   |       |        |        |      |     |   |        |      |      |      |      |      |      |      |        |      |       |        |        |      |      |      |        |      |       |        |        |      |      |      |       |   |       |        |        |      |     |   |
| Lab 13    | 4                                                                                                                                                                                           | 22.08                                                                                                                                                                                                                                                                                                                                                                                                                                                                                                                                                                                                                                                                                                                                                                                                                                                                                                                                                                                                                                                                                                                                                                                                                                                                                                                                                                                                                                                                                                                                                                                                                                                                                                                                                                                                                                                                                                                                                                                                                                                                                                         | 830.54    | 728.09                             | +ESI             | AD2                | a         |          |                    |     |       |   |       |        |        |      |     |   |       |      |      |      |      |      |      |      |       |   |       |        |        |      |     |   |        |      |      |        |        |      |      |      |        |      |       |        |        |      |      |      |        |   |      |        |        |      |     |   |       |      |       |        |        |      |      |      |       |   |       |        |        |      |     |   |        |      |      |      |      |      |      |      |        |      |       |        |        |      |      |      |        |      |       |        |        |      |      |      |       |   |       |        |        |      |     |   |
| Lab 15    | 1                                                                                                                                                                                           | 9.59                                                                                                                                                                                                                                                                                                                                                                                                                                                                                                                                                                                                                                                                                                                                                                                                                                                                                                                                                                                                                                                                                                                                                                                                                                                                                                                                                                                                                                                                                                                                                                                                                                                                                                                                                                                                                                                                                                                                                                                                                                                                                                          | 795.11    | 728.09                             | +ESI             | AD1                | a         |          |                    |     |       |   |       |        |        |      |     |   |       |      |      |      |      |      |      |      |       |   |       |        |        |      |     |   |        |      |      |        |        |      |      |      |        |      |       |        |        |      |      |      |        |   |      |        |        |      |     |   |       |      |       |        |        |      |      |      |       |   |       |        |        |      |     |   |        |      |      |      |      |      |      |      |        |      |       |        |        |      |      |      |        |      |       |        |        |      |      |      |       |   |       |        |        |      |     |   |
| Lab 9     | N.D.                                                                                                                                                                                        | N.D.                                                                                                                                                                                                                                                                                                                                                                                                                                                                                                                                                                                                                                                                                                                                                                                                                                                                                                                                                                                                                                                                                                                                                                                                                                                                                                                                                                                                                                                                                                                                                                                                                                                                                                                                                                                                                                                                                                                                                                                                                                                                                                          | N.D.      | N.D.                               | N.D.             | N.D.               | N.D.      |          |                    |     |       |   |       |        |        |      |     |   |       |      |      |      |      |      |      |      |       |   |       |        |        |      |     |   |        |      |      |        |        |      |      |      |        |      |       |        |        |      |      |      |        |   |      |        |        |      |     |   |       |      |       |        |        |      |      |      |       |   |       |        |        |      |     |   |        |      |      |      |      |      |      |      |        |      |       |        |        |      |      |      |        |      |       |        |        |      |      |      |       |   |       |        |        |      |     |   |
| Lab 2     | 1                                                                                                                                                                                           | 35.43                                                                                                                                                                                                                                                                                                                                                                                                                                                                                                                                                                                                                                                                                                                                                                                                                                                                                                                                                                                                                                                                                                                                                                                                                                                                                                                                                                                                                                                                                                                                                                                                                                                                                                                                                                                                                                                                                                                                                                                                                                                                                                         | 790.58    | 728.09                             | +ESI             | AD1                | a         |          |                    |     |       |   |       |        |        |      |     |   |       |      |      |      |      |      |      |      |       |   |       |        |        |      |     |   |        |      |      |        |        |      |      |      |        |      |       |        |        |      |      |      |        |   |      |        |        |      |     |   |       |      |       |        |        |      |      |      |       |   |       |        |        |      |     |   |        |      |      |      |      |      |      |      |        |      |       |        |        |      |      |      |        |      |       |        |        |      |      |      |       |   |       |        |        |      |     |   |
| Lab 18    | N.D.                                                                                                                                                                                        | N.D.                                                                                                                                                                                                                                                                                                                                                                                                                                                                                                                                                                                                                                                                                                                                                                                                                                                                                                                                                                                                                                                                                                                                                                                                                                                                                                                                                                                                                                                                                                                                                                                                                                                                                                                                                                                                                                                                                                                                                                                                                                                                                                          | N.D.      | N.D.                               | N.D.             | N.D.               | N.D.      |          |                    |     |       |   |       |        |        |      |     |   |       |      |      |      |      |      |      |      |       |   |       |        |        |      |     |   |        |      |      |        |        |      |      |      |        |      |       |        |        |      |      |      |        |   |      |        |        |      |     |   |       |      |       |        |        |      |      |      |       |   |       |        |        |      |     |   |        |      |      |      |      |      |      |      |        |      |       |        |        |      |      |      |        |      |       |        |        |      |      |      |       |   |       |        |        |      |     |   |
| Lab 17    | N.D.                                                                                                                                                                                        | N.D.                                                                                                                                                                                                                                                                                                                                                                                                                                                                                                                                                                                                                                                                                                                                                                                                                                                                                                                                                                                                                                                                                                                                                                                                                                                                                                                                                                                                                                                                                                                                                                                                                                                                                                                                                                                                                                                                                                                                                                                                                                                                                                          | N.D.      | N.D.                               | N.D.             | N.D.               | N.D.      |          |                    |     |       |   |       |        |        |      |     |   |       |      |      |      |      |      |      |      |       |   |       |        |        |      |     |   |        |      |      |        |        |      |      |      |        |      |       |        |        |      |      |      |        |   |      |        |        |      |     |   |       |      |       |        |        |      |      |      |       |   |       |        |        |      |     |   |        |      |      |      |      |      |      |      |        |      |       |        |        |      |      |      |        |      |       |        |        |      |      |      |       |   |       |        |        |      |     |   |
| Lab 10    | N.D.                                                                                                                                                                                        | N.D.                                                                                                                                                                                                                                                                                                                                                                                                                                                                                                                                                                                                                                                                                                                                                                                                                                                                                                                                                                                                                                                                                                                                                                                                                                                                                                                                                                                                                                                                                                                                                                                                                                                                                                                                                                                                                                                                                                                                                                                                                                                                                                          | N.D.      | N.D.                               | N.D.             | N.D.               | N.D.      |          |                    |     |       |   |       |        |        |      |     |   |       |      |      |      |      |      |      |      |       |   |       |        |        |      |     |   |        |      |      |        |        |      |      |      |        |      |       |        |        |      |      |      |        |   |      |        |        |      |     |   |       |      |       |        |        |      |      |      |       |   |       |        |        |      |     |   |        |      |      |      |      |      |      |      |        |      |       |        |        |      |      |      |        |      |       |        |        |      |      |      |       |   |       |        |        |      |     |   |
| Lab 7     | 2                                                                                                                                                                                           | 17.28                                                                                                                                                                                                                                                                                                                                                                                                                                                                                                                                                                                                                                                                                                                                                                                                                                                                                                                                                                                                                                                                                                                                                                                                                                                                                                                                                                                                                                                                                                                                                                                                                                                                                                                                                                                                                                                                                                                                                                                                                                                                                                         | 717.49    | 728.09                             | +ESI             | AD1                | a         |          |                    |     |       |   |       |        |        |      |     |   |       |      |      |      |      |      |      |      |       |   |       |        |        |      |     |   |        |      |      |        |        |      |      |      |        |      |       |        |        |      |      |      |        |   |      |        |        |      |     |   |       |      |       |        |        |      |      |      |       |   |       |        |        |      |     |   |        |      |      |      |      |      |      |      |        |      |       |        |        |      |      |      |        |      |       |        |        |      |      |      |       |   |       |        |        |      |     |   |

| No.       | multiple comparison procedure plot                                                                                                                                                                                                                                  | RTI details                                                                                                                                                                                                                                                                                                                                                                                                                                                                                                                                                                                                                                                                                                                                                                                                                                                                                                                                                                                                                                                                                                                                                                                                                                                                                                                                                                                                                                                                                                                                                                                                                                                                                                                                                                                                                                                                                                                                                                                                                                                                                                                                                                             |           |                                    |                           |                    |           |          |                    |     |       |   |      |        |        |      |     |   |       |      |      |        |        |      |      |      |       |   |      |        |        |      |     |   |        |      |      |        |        |      |      |      |        |      |      |       |        |      |      |      |        |   |      |        |        |      |     |   |       |   |      |        |        |      |     |   |       |   |      |        |        |      |     |   |        |      |      |      |      |      |      |      |        |   |      |        |        |      |     |   |        |      |      |        |        |      |      |      |       |   |      |        |        |      |     |   |
|-----------|---------------------------------------------------------------------------------------------------------------------------------------------------------------------------------------------------------------------------------------------------------------------|-----------------------------------------------------------------------------------------------------------------------------------------------------------------------------------------------------------------------------------------------------------------------------------------------------------------------------------------------------------------------------------------------------------------------------------------------------------------------------------------------------------------------------------------------------------------------------------------------------------------------------------------------------------------------------------------------------------------------------------------------------------------------------------------------------------------------------------------------------------------------------------------------------------------------------------------------------------------------------------------------------------------------------------------------------------------------------------------------------------------------------------------------------------------------------------------------------------------------------------------------------------------------------------------------------------------------------------------------------------------------------------------------------------------------------------------------------------------------------------------------------------------------------------------------------------------------------------------------------------------------------------------------------------------------------------------------------------------------------------------------------------------------------------------------------------------------------------------------------------------------------------------------------------------------------------------------------------------------------------------------------------------------------------------------------------------------------------------------------------------------------------------------------------------------------------------|-----------|------------------------------------|---------------------------|--------------------|-----------|----------|--------------------|-----|-------|---|------|--------|--------|------|-----|---|-------|------|------|--------|--------|------|------|------|-------|---|------|--------|--------|------|-----|---|--------|------|------|--------|--------|------|------|------|--------|------|------|-------|--------|------|------|------|--------|---|------|--------|--------|------|-----|---|-------|---|------|--------|--------|------|-----|---|-------|---|------|--------|--------|------|-----|---|--------|------|------|------|------|------|------|------|--------|---|------|--------|--------|------|-----|---|--------|------|------|--------|--------|------|------|------|-------|---|------|--------|--------|------|-----|---|
| (4)       | <p style="text-align: center;"><b>Comparison of Exp. RTI values: Caffeine</b></p> 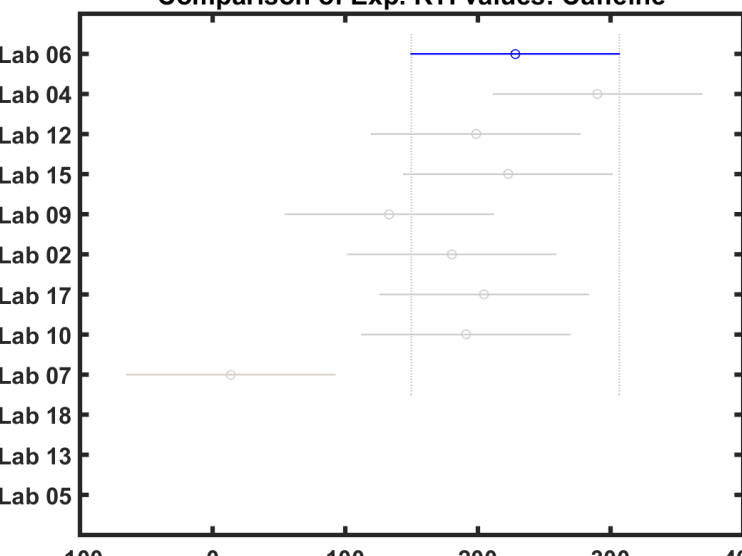 <p style="text-align: center;">No groups have means significantly different from LC06</p>       | <table border="1"> <thead> <tr> <th>Institute</th> <th>Level of identification confidence</th> <th>Exp. t<sub>R</sub> (min)</th> <th>Exp. RTI</th> <th>Pred. RTI</th> <th>ESI mode</th> <th>Application domain</th> <th>MCP</th> </tr> </thead> <tbody> <tr><td>Lab 6</td><td>1</td><td>4.29</td><td>228.10</td><td>224.24</td><td>+ESI</td><td>AD1</td><td>a</td></tr> <tr><td>Lab 5</td><td>N.D.</td><td>N.D.</td><td>N.D.</td><td>N.D.</td><td>N.D.</td><td>N.D.</td><td>N.D.</td></tr> <tr><td>Lab 4</td><td>2</td><td>5.92</td><td>282.24</td><td>224.24</td><td>+ESI</td><td>AD1</td><td>a</td></tr> <tr><td>Lab 12</td><td>2a</td><td>2.25</td><td>198.40</td><td>224.24</td><td>+ESI</td><td>AD1</td><td>a</td></tr> <tr><td>Lab 13</td><td>N.D.</td><td>N.D.</td><td>N.D.</td><td>N.D.</td><td>N.D.</td><td>N.D.</td><td>N.D.</td></tr> <tr><td>Lab 15</td><td>1</td><td>2.77</td><td>222.63</td><td>224.24</td><td>+ESI</td><td>AD1</td><td>a</td></tr> <tr><td>Lab 9</td><td>2</td><td>4.54</td><td>151.96</td><td>224.24</td><td>+ESI</td><td>AD1</td><td>a</td></tr> <tr><td>Lab 2</td><td>2</td><td>5.33</td><td>180.39</td><td>224.24</td><td>+ESI</td><td>AD1</td><td>a</td></tr> <tr><td>Lab 18</td><td>N.D.</td><td>N.D.</td><td>N.D.</td><td>N.D.</td><td>N.D.</td><td>N.D.</td><td>N.D.</td></tr> <tr><td>Lab 17</td><td>1</td><td>4.01</td><td>204.65</td><td>224.24</td><td>+ESI</td><td>AD1</td><td>a</td></tr> <tr><td>Lab 10</td><td>2</td><td>3.31</td><td>190.93</td><td>224.24</td><td>+ESI</td><td>AD1</td><td>a</td></tr> <tr><td>Lab 7</td><td>1</td><td>2.15</td><td>13.76</td><td>224.24</td><td>+ESI</td><td>AD3</td><td>a</td></tr> </tbody> </table> <p>AD1: Exp. &amp; Pred. t<sub>R</sub> are accepted for this candidate (box1)<br/> AD3: Pred./Exp. t<sub>R</sub> are not reliable (high SR; use other verification tools (box3))<br/> N.D.: Not detected.<br/> All institutes have acceptable exp. RTI values and the difference is <b>not significant at 99% CIs</b> of the calibration curve.</p>                                                                                                                                            | Institute | Level of identification confidence | Exp. t <sub>R</sub> (min) | Exp. RTI           | Pred. RTI | ESI mode | Application domain | MCP | Lab 6 | 1 | 4.29 | 228.10 | 224.24 | +ESI | AD1 | a | Lab 5 | N.D. | N.D. | N.D.   | N.D.   | N.D. | N.D. | N.D. | Lab 4 | 2 | 5.92 | 282.24 | 224.24 | +ESI | AD1 | a | Lab 12 | 2a   | 2.25 | 198.40 | 224.24 | +ESI | AD1  | a    | Lab 13 | N.D. | N.D. | N.D.  | N.D.   | N.D. | N.D. | N.D. | Lab 15 | 1 | 2.77 | 222.63 | 224.24 | +ESI | AD1 | a | Lab 9 | 2 | 4.54 | 151.96 | 224.24 | +ESI | AD1 | a | Lab 2 | 2 | 5.33 | 180.39 | 224.24 | +ESI | AD1 | a | Lab 18 | N.D. | N.D. | N.D. | N.D. | N.D. | N.D. | N.D. | Lab 17 | 1 | 4.01 | 204.65 | 224.24 | +ESI | AD1 | a | Lab 10 | 2    | 3.31 | 190.93 | 224.24 | +ESI | AD1  | a    | Lab 7 | 1 | 2.15 | 13.76  | 224.24 | +ESI | AD3 | a |
| Institute | Level of identification confidence                                                                                                                                                                                                                                  | Exp. t <sub>R</sub> (min)                                                                                                                                                                                                                                                                                                                                                                                                                                                                                                                                                                                                                                                                                                                                                                                                                                                                                                                                                                                                                                                                                                                                                                                                                                                                                                                                                                                                                                                                                                                                                                                                                                                                                                                                                                                                                                                                                                                                                                                                                                                                                                                                                               | Exp. RTI  | Pred. RTI                          | ESI mode                  | Application domain | MCP       |          |                    |     |       |   |      |        |        |      |     |   |       |      |      |        |        |      |      |      |       |   |      |        |        |      |     |   |        |      |      |        |        |      |      |      |        |      |      |       |        |      |      |      |        |   |      |        |        |      |     |   |       |   |      |        |        |      |     |   |       |   |      |        |        |      |     |   |        |      |      |      |      |      |      |      |        |   |      |        |        |      |     |   |        |      |      |        |        |      |      |      |       |   |      |        |        |      |     |   |
| Lab 6     | 1                                                                                                                                                                                                                                                                   | 4.29                                                                                                                                                                                                                                                                                                                                                                                                                                                                                                                                                                                                                                                                                                                                                                                                                                                                                                                                                                                                                                                                                                                                                                                                                                                                                                                                                                                                                                                                                                                                                                                                                                                                                                                                                                                                                                                                                                                                                                                                                                                                                                                                                                                    | 228.10    | 224.24                             | +ESI                      | AD1                | a         |          |                    |     |       |   |      |        |        |      |     |   |       |      |      |        |        |      |      |      |       |   |      |        |        |      |     |   |        |      |      |        |        |      |      |      |        |      |      |       |        |      |      |      |        |   |      |        |        |      |     |   |       |   |      |        |        |      |     |   |       |   |      |        |        |      |     |   |        |      |      |      |      |      |      |      |        |   |      |        |        |      |     |   |        |      |      |        |        |      |      |      |       |   |      |        |        |      |     |   |
| Lab 5     | N.D.                                                                                                                                                                                                                                                                | N.D.                                                                                                                                                                                                                                                                                                                                                                                                                                                                                                                                                                                                                                                                                                                                                                                                                                                                                                                                                                                                                                                                                                                                                                                                                                                                                                                                                                                                                                                                                                                                                                                                                                                                                                                                                                                                                                                                                                                                                                                                                                                                                                                                                                                    | N.D.      | N.D.                               | N.D.                      | N.D.               | N.D.      |          |                    |     |       |   |      |        |        |      |     |   |       |      |      |        |        |      |      |      |       |   |      |        |        |      |     |   |        |      |      |        |        |      |      |      |        |      |      |       |        |      |      |      |        |   |      |        |        |      |     |   |       |   |      |        |        |      |     |   |       |   |      |        |        |      |     |   |        |      |      |      |      |      |      |      |        |   |      |        |        |      |     |   |        |      |      |        |        |      |      |      |       |   |      |        |        |      |     |   |
| Lab 4     | 2                                                                                                                                                                                                                                                                   | 5.92                                                                                                                                                                                                                                                                                                                                                                                                                                                                                                                                                                                                                                                                                                                                                                                                                                                                                                                                                                                                                                                                                                                                                                                                                                                                                                                                                                                                                                                                                                                                                                                                                                                                                                                                                                                                                                                                                                                                                                                                                                                                                                                                                                                    | 282.24    | 224.24                             | +ESI                      | AD1                | a         |          |                    |     |       |   |      |        |        |      |     |   |       |      |      |        |        |      |      |      |       |   |      |        |        |      |     |   |        |      |      |        |        |      |      |      |        |      |      |       |        |      |      |      |        |   |      |        |        |      |     |   |       |   |      |        |        |      |     |   |       |   |      |        |        |      |     |   |        |      |      |      |      |      |      |      |        |   |      |        |        |      |     |   |        |      |      |        |        |      |      |      |       |   |      |        |        |      |     |   |
| Lab 12    | 2a                                                                                                                                                                                                                                                                  | 2.25                                                                                                                                                                                                                                                                                                                                                                                                                                                                                                                                                                                                                                                                                                                                                                                                                                                                                                                                                                                                                                                                                                                                                                                                                                                                                                                                                                                                                                                                                                                                                                                                                                                                                                                                                                                                                                                                                                                                                                                                                                                                                                                                                                                    | 198.40    | 224.24                             | +ESI                      | AD1                | a         |          |                    |     |       |   |      |        |        |      |     |   |       |      |      |        |        |      |      |      |       |   |      |        |        |      |     |   |        |      |      |        |        |      |      |      |        |      |      |       |        |      |      |      |        |   |      |        |        |      |     |   |       |   |      |        |        |      |     |   |       |   |      |        |        |      |     |   |        |      |      |      |      |      |      |      |        |   |      |        |        |      |     |   |        |      |      |        |        |      |      |      |       |   |      |        |        |      |     |   |
| Lab 13    | N.D.                                                                                                                                                                                                                                                                | N.D.                                                                                                                                                                                                                                                                                                                                                                                                                                                                                                                                                                                                                                                                                                                                                                                                                                                                                                                                                                                                                                                                                                                                                                                                                                                                                                                                                                                                                                                                                                                                                                                                                                                                                                                                                                                                                                                                                                                                                                                                                                                                                                                                                                                    | N.D.      | N.D.                               | N.D.                      | N.D.               | N.D.      |          |                    |     |       |   |      |        |        |      |     |   |       |      |      |        |        |      |      |      |       |   |      |        |        |      |     |   |        |      |      |        |        |      |      |      |        |      |      |       |        |      |      |      |        |   |      |        |        |      |     |   |       |   |      |        |        |      |     |   |       |   |      |        |        |      |     |   |        |      |      |      |      |      |      |      |        |   |      |        |        |      |     |   |        |      |      |        |        |      |      |      |       |   |      |        |        |      |     |   |
| Lab 15    | 1                                                                                                                                                                                                                                                                   | 2.77                                                                                                                                                                                                                                                                                                                                                                                                                                                                                                                                                                                                                                                                                                                                                                                                                                                                                                                                                                                                                                                                                                                                                                                                                                                                                                                                                                                                                                                                                                                                                                                                                                                                                                                                                                                                                                                                                                                                                                                                                                                                                                                                                                                    | 222.63    | 224.24                             | +ESI                      | AD1                | a         |          |                    |     |       |   |      |        |        |      |     |   |       |      |      |        |        |      |      |      |       |   |      |        |        |      |     |   |        |      |      |        |        |      |      |      |        |      |      |       |        |      |      |      |        |   |      |        |        |      |     |   |       |   |      |        |        |      |     |   |       |   |      |        |        |      |     |   |        |      |      |      |      |      |      |      |        |   |      |        |        |      |     |   |        |      |      |        |        |      |      |      |       |   |      |        |        |      |     |   |
| Lab 9     | 2                                                                                                                                                                                                                                                                   | 4.54                                                                                                                                                                                                                                                                                                                                                                                                                                                                                                                                                                                                                                                                                                                                                                                                                                                                                                                                                                                                                                                                                                                                                                                                                                                                                                                                                                                                                                                                                                                                                                                                                                                                                                                                                                                                                                                                                                                                                                                                                                                                                                                                                                                    | 151.96    | 224.24                             | +ESI                      | AD1                | a         |          |                    |     |       |   |      |        |        |      |     |   |       |      |      |        |        |      |      |      |       |   |      |        |        |      |     |   |        |      |      |        |        |      |      |      |        |      |      |       |        |      |      |      |        |   |      |        |        |      |     |   |       |   |      |        |        |      |     |   |       |   |      |        |        |      |     |   |        |      |      |      |      |      |      |      |        |   |      |        |        |      |     |   |        |      |      |        |        |      |      |      |       |   |      |        |        |      |     |   |
| Lab 2     | 2                                                                                                                                                                                                                                                                   | 5.33                                                                                                                                                                                                                                                                                                                                                                                                                                                                                                                                                                                                                                                                                                                                                                                                                                                                                                                                                                                                                                                                                                                                                                                                                                                                                                                                                                                                                                                                                                                                                                                                                                                                                                                                                                                                                                                                                                                                                                                                                                                                                                                                                                                    | 180.39    | 224.24                             | +ESI                      | AD1                | a         |          |                    |     |       |   |      |        |        |      |     |   |       |      |      |        |        |      |      |      |       |   |      |        |        |      |     |   |        |      |      |        |        |      |      |      |        |      |      |       |        |      |      |      |        |   |      |        |        |      |     |   |       |   |      |        |        |      |     |   |       |   |      |        |        |      |     |   |        |      |      |      |      |      |      |      |        |   |      |        |        |      |     |   |        |      |      |        |        |      |      |      |       |   |      |        |        |      |     |   |
| Lab 18    | N.D.                                                                                                                                                                                                                                                                | N.D.                                                                                                                                                                                                                                                                                                                                                                                                                                                                                                                                                                                                                                                                                                                                                                                                                                                                                                                                                                                                                                                                                                                                                                                                                                                                                                                                                                                                                                                                                                                                                                                                                                                                                                                                                                                                                                                                                                                                                                                                                                                                                                                                                                                    | N.D.      | N.D.                               | N.D.                      | N.D.               | N.D.      |          |                    |     |       |   |      |        |        |      |     |   |       |      |      |        |        |      |      |      |       |   |      |        |        |      |     |   |        |      |      |        |        |      |      |      |        |      |      |       |        |      |      |      |        |   |      |        |        |      |     |   |       |   |      |        |        |      |     |   |       |   |      |        |        |      |     |   |        |      |      |      |      |      |      |      |        |   |      |        |        |      |     |   |        |      |      |        |        |      |      |      |       |   |      |        |        |      |     |   |
| Lab 17    | 1                                                                                                                                                                                                                                                                   | 4.01                                                                                                                                                                                                                                                                                                                                                                                                                                                                                                                                                                                                                                                                                                                                                                                                                                                                                                                                                                                                                                                                                                                                                                                                                                                                                                                                                                                                                                                                                                                                                                                                                                                                                                                                                                                                                                                                                                                                                                                                                                                                                                                                                                                    | 204.65    | 224.24                             | +ESI                      | AD1                | a         |          |                    |     |       |   |      |        |        |      |     |   |       |      |      |        |        |      |      |      |       |   |      |        |        |      |     |   |        |      |      |        |        |      |      |      |        |      |      |       |        |      |      |      |        |   |      |        |        |      |     |   |       |   |      |        |        |      |     |   |       |   |      |        |        |      |     |   |        |      |      |      |      |      |      |      |        |   |      |        |        |      |     |   |        |      |      |        |        |      |      |      |       |   |      |        |        |      |     |   |
| Lab 10    | 2                                                                                                                                                                                                                                                                   | 3.31                                                                                                                                                                                                                                                                                                                                                                                                                                                                                                                                                                                                                                                                                                                                                                                                                                                                                                                                                                                                                                                                                                                                                                                                                                                                                                                                                                                                                                                                                                                                                                                                                                                                                                                                                                                                                                                                                                                                                                                                                                                                                                                                                                                    | 190.93    | 224.24                             | +ESI                      | AD1                | a         |          |                    |     |       |   |      |        |        |      |     |   |       |      |      |        |        |      |      |      |       |   |      |        |        |      |     |   |        |      |      |        |        |      |      |      |        |      |      |       |        |      |      |      |        |   |      |        |        |      |     |   |       |   |      |        |        |      |     |   |       |   |      |        |        |      |     |   |        |      |      |      |      |      |      |      |        |   |      |        |        |      |     |   |        |      |      |        |        |      |      |      |       |   |      |        |        |      |     |   |
| Lab 7     | 1                                                                                                                                                                                                                                                                   | 2.15                                                                                                                                                                                                                                                                                                                                                                                                                                                                                                                                                                                                                                                                                                                                                                                                                                                                                                                                                                                                                                                                                                                                                                                                                                                                                                                                                                                                                                                                                                                                                                                                                                                                                                                                                                                                                                                                                                                                                                                                                                                                                                                                                                                    | 13.76     | 224.24                             | +ESI                      | AD3                | a         |          |                    |     |       |   |      |        |        |      |     |   |       |      |      |        |        |      |      |      |       |   |      |        |        |      |     |   |        |      |      |        |        |      |      |      |        |      |      |       |        |      |      |      |        |   |      |        |        |      |     |   |       |   |      |        |        |      |     |   |       |   |      |        |        |      |     |   |        |      |      |      |      |      |      |      |        |   |      |        |        |      |     |   |        |      |      |        |        |      |      |      |       |   |      |        |        |      |     |   |
| (5)       | <p style="text-align: center;"><b>Comparison of Exp. RTI values: Paracetamol</b></p>  <p style="text-align: center;">No groups have means significantly different from Lab 06</p> | <table border="1"> <thead> <tr> <th>Institute</th> <th>Level of identification confidence</th> <th>Exp. t<sub>R</sub> (min)</th> <th>Exp. RTI</th> <th>Pred. RTI</th> <th>ESI mode</th> <th>Application domain</th> <th>MCP</th> </tr> </thead> <tbody> <tr><td>Lab 6</td><td>1</td><td>3.36</td><td>156.82</td><td>216.05</td><td>+ESI</td><td>AD1</td><td>a</td></tr> <tr><td>Lab 5</td><td>2A</td><td>4.88</td><td>158.66</td><td>216.05</td><td>+ESI</td><td>AD1</td><td>a</td></tr> <tr><td>Lab 4</td><td>2</td><td>4.93</td><td>220.93</td><td>216.05</td><td>+ESI</td><td>AD1</td><td>a</td></tr> <tr><td>Lab 12</td><td>N.D.</td><td>N.D.</td><td>N.D.</td><td>N.D.</td><td>N.D.</td><td>N.D.</td><td>N.D.</td></tr> <tr><td>Lab 13</td><td>4</td><td>2.90</td><td>97.62</td><td>216.05</td><td>+ESI</td><td>AD2</td><td>a</td></tr> <tr><td>Lab 15</td><td>1</td><td>1.50</td><td>116.02</td><td>216.05</td><td>+ESI</td><td>AD2</td><td>a</td></tr> <tr><td>Lab 9</td><td>2</td><td>2.31</td><td>2.67</td><td>216.05</td><td>+ESI</td><td>AD3</td><td>a</td></tr> <tr><td>Lab 2</td><td>1</td><td>2.15</td><td>115.90</td><td>216.05</td><td>+ESI</td><td>AD2</td><td>a</td></tr> <tr><td>Lab 18</td><td>N.D.</td><td>N.D.</td><td>N.D.</td><td>N.D.</td><td>N.D.</td><td>N.D.</td><td>N.D.</td></tr> <tr><td>Lab 17</td><td>1</td><td>2.48</td><td>114.50</td><td>216.05</td><td>+ESI</td><td>AD2</td><td>a</td></tr> <tr><td>Lab 10</td><td>N.D.</td><td>N.D.</td><td>N.D.</td><td>N.D.</td><td>N.D.</td><td>N.D.</td><td>N.D.</td></tr> <tr><td>Lab 7</td><td>2</td><td>7.65</td><td>214.60</td><td>216.05</td><td>+ESI</td><td>AD1</td><td>a</td></tr> </tbody> </table> <p>AD1: Exp. &amp; Pred. t<sub>R</sub> are accepted for this candidate (box1)<br/> AD2: Although there is error, exp. &amp; pred. t<sub>R</sub> are accepted for this candidate (box2)<br/> AD3: Pred./Exp. t<sub>R</sub> are not reliable (high SR; use other verification tools (box3))<br/> N.D.: Not detected.<br/> All institutes have acceptable exp. RTI values and the difference is <b>not significant at 99% CIs</b> of the calibration curve. <b>Promote "Lab 13" to level 2!</b></p> | Institute | Level of identification confidence | Exp. t <sub>R</sub> (min) | Exp. RTI           | Pred. RTI | ESI mode | Application domain | MCP | Lab 6 | 1 | 3.36 | 156.82 | 216.05 | +ESI | AD1 | a | Lab 5 | 2A   | 4.88 | 158.66 | 216.05 | +ESI | AD1  | a    | Lab 4 | 2 | 4.93 | 220.93 | 216.05 | +ESI | AD1 | a | Lab 12 | N.D. | N.D. | N.D.   | N.D.   | N.D. | N.D. | N.D. | Lab 13 | 4    | 2.90 | 97.62 | 216.05 | +ESI | AD2  | a    | Lab 15 | 1 | 1.50 | 116.02 | 216.05 | +ESI | AD2 | a | Lab 9 | 2 | 2.31 | 2.67   | 216.05 | +ESI | AD3 | a | Lab 2 | 1 | 2.15 | 115.90 | 216.05 | +ESI | AD2 | a | Lab 18 | N.D. | N.D. | N.D. | N.D. | N.D. | N.D. | N.D. | Lab 17 | 1 | 2.48 | 114.50 | 216.05 | +ESI | AD2 | a | Lab 10 | N.D. | N.D. | N.D.   | N.D.   | N.D. | N.D. | N.D. | Lab 7 | 2 | 7.65 | 214.60 | 216.05 | +ESI | AD1 | a |
| Institute | Level of identification confidence                                                                                                                                                                                                                                  | Exp. t <sub>R</sub> (min)                                                                                                                                                                                                                                                                                                                                                                                                                                                                                                                                                                                                                                                                                                                                                                                                                                                                                                                                                                                                                                                                                                                                                                                                                                                                                                                                                                                                                                                                                                                                                                                                                                                                                                                                                                                                                                                                                                                                                                                                                                                                                                                                                               | Exp. RTI  | Pred. RTI                          | ESI mode                  | Application domain | MCP       |          |                    |     |       |   |      |        |        |      |     |   |       |      |      |        |        |      |      |      |       |   |      |        |        |      |     |   |        |      |      |        |        |      |      |      |        |      |      |       |        |      |      |      |        |   |      |        |        |      |     |   |       |   |      |        |        |      |     |   |       |   |      |        |        |      |     |   |        |      |      |      |      |      |      |      |        |   |      |        |        |      |     |   |        |      |      |        |        |      |      |      |       |   |      |        |        |      |     |   |
| Lab 6     | 1                                                                                                                                                                                                                                                                   | 3.36                                                                                                                                                                                                                                                                                                                                                                                                                                                                                                                                                                                                                                                                                                                                                                                                                                                                                                                                                                                                                                                                                                                                                                                                                                                                                                                                                                                                                                                                                                                                                                                                                                                                                                                                                                                                                                                                                                                                                                                                                                                                                                                                                                                    | 156.82    | 216.05                             | +ESI                      | AD1                | a         |          |                    |     |       |   |      |        |        |      |     |   |       |      |      |        |        |      |      |      |       |   |      |        |        |      |     |   |        |      |      |        |        |      |      |      |        |      |      |       |        |      |      |      |        |   |      |        |        |      |     |   |       |   |      |        |        |      |     |   |       |   |      |        |        |      |     |   |        |      |      |      |      |      |      |      |        |   |      |        |        |      |     |   |        |      |      |        |        |      |      |      |       |   |      |        |        |      |     |   |
| Lab 5     | 2A                                                                                                                                                                                                                                                                  | 4.88                                                                                                                                                                                                                                                                                                                                                                                                                                                                                                                                                                                                                                                                                                                                                                                                                                                                                                                                                                                                                                                                                                                                                                                                                                                                                                                                                                                                                                                                                                                                                                                                                                                                                                                                                                                                                                                                                                                                                                                                                                                                                                                                                                                    | 158.66    | 216.05                             | +ESI                      | AD1                | a         |          |                    |     |       |   |      |        |        |      |     |   |       |      |      |        |        |      |      |      |       |   |      |        |        |      |     |   |        |      |      |        |        |      |      |      |        |      |      |       |        |      |      |      |        |   |      |        |        |      |     |   |       |   |      |        |        |      |     |   |       |   |      |        |        |      |     |   |        |      |      |      |      |      |      |      |        |   |      |        |        |      |     |   |        |      |      |        |        |      |      |      |       |   |      |        |        |      |     |   |
| Lab 4     | 2                                                                                                                                                                                                                                                                   | 4.93                                                                                                                                                                                                                                                                                                                                                                                                                                                                                                                                                                                                                                                                                                                                                                                                                                                                                                                                                                                                                                                                                                                                                                                                                                                                                                                                                                                                                                                                                                                                                                                                                                                                                                                                                                                                                                                                                                                                                                                                                                                                                                                                                                                    | 220.93    | 216.05                             | +ESI                      | AD1                | a         |          |                    |     |       |   |      |        |        |      |     |   |       |      |      |        |        |      |      |      |       |   |      |        |        |      |     |   |        |      |      |        |        |      |      |      |        |      |      |       |        |      |      |      |        |   |      |        |        |      |     |   |       |   |      |        |        |      |     |   |       |   |      |        |        |      |     |   |        |      |      |      |      |      |      |      |        |   |      |        |        |      |     |   |        |      |      |        |        |      |      |      |       |   |      |        |        |      |     |   |
| Lab 12    | N.D.                                                                                                                                                                                                                                                                | N.D.                                                                                                                                                                                                                                                                                                                                                                                                                                                                                                                                                                                                                                                                                                                                                                                                                                                                                                                                                                                                                                                                                                                                                                                                                                                                                                                                                                                                                                                                                                                                                                                                                                                                                                                                                                                                                                                                                                                                                                                                                                                                                                                                                                                    | N.D.      | N.D.                               | N.D.                      | N.D.               | N.D.      |          |                    |     |       |   |      |        |        |      |     |   |       |      |      |        |        |      |      |      |       |   |      |        |        |      |     |   |        |      |      |        |        |      |      |      |        |      |      |       |        |      |      |      |        |   |      |        |        |      |     |   |       |   |      |        |        |      |     |   |       |   |      |        |        |      |     |   |        |      |      |      |      |      |      |      |        |   |      |        |        |      |     |   |        |      |      |        |        |      |      |      |       |   |      |        |        |      |     |   |
| Lab 13    | 4                                                                                                                                                                                                                                                                   | 2.90                                                                                                                                                                                                                                                                                                                                                                                                                                                                                                                                                                                                                                                                                                                                                                                                                                                                                                                                                                                                                                                                                                                                                                                                                                                                                                                                                                                                                                                                                                                                                                                                                                                                                                                                                                                                                                                                                                                                                                                                                                                                                                                                                                                    | 97.62     | 216.05                             | +ESI                      | AD2                | a         |          |                    |     |       |   |      |        |        |      |     |   |       |      |      |        |        |      |      |      |       |   |      |        |        |      |     |   |        |      |      |        |        |      |      |      |        |      |      |       |        |      |      |      |        |   |      |        |        |      |     |   |       |   |      |        |        |      |     |   |       |   |      |        |        |      |     |   |        |      |      |      |      |      |      |      |        |   |      |        |        |      |     |   |        |      |      |        |        |      |      |      |       |   |      |        |        |      |     |   |
| Lab 15    | 1                                                                                                                                                                                                                                                                   | 1.50                                                                                                                                                                                                                                                                                                                                                                                                                                                                                                                                                                                                                                                                                                                                                                                                                                                                                                                                                                                                                                                                                                                                                                                                                                                                                                                                                                                                                                                                                                                                                                                                                                                                                                                                                                                                                                                                                                                                                                                                                                                                                                                                                                                    | 116.02    | 216.05                             | +ESI                      | AD2                | a         |          |                    |     |       |   |      |        |        |      |     |   |       |      |      |        |        |      |      |      |       |   |      |        |        |      |     |   |        |      |      |        |        |      |      |      |        |      |      |       |        |      |      |      |        |   |      |        |        |      |     |   |       |   |      |        |        |      |     |   |       |   |      |        |        |      |     |   |        |      |      |      |      |      |      |      |        |   |      |        |        |      |     |   |        |      |      |        |        |      |      |      |       |   |      |        |        |      |     |   |
| Lab 9     | 2                                                                                                                                                                                                                                                                   | 2.31                                                                                                                                                                                                                                                                                                                                                                                                                                                                                                                                                                                                                                                                                                                                                                                                                                                                                                                                                                                                                                                                                                                                                                                                                                                                                                                                                                                                                                                                                                                                                                                                                                                                                                                                                                                                                                                                                                                                                                                                                                                                                                                                                                                    | 2.67      | 216.05                             | +ESI                      | AD3                | a         |          |                    |     |       |   |      |        |        |      |     |   |       |      |      |        |        |      |      |      |       |   |      |        |        |      |     |   |        |      |      |        |        |      |      |      |        |      |      |       |        |      |      |      |        |   |      |        |        |      |     |   |       |   |      |        |        |      |     |   |       |   |      |        |        |      |     |   |        |      |      |      |      |      |      |      |        |   |      |        |        |      |     |   |        |      |      |        |        |      |      |      |       |   |      |        |        |      |     |   |
| Lab 2     | 1                                                                                                                                                                                                                                                                   | 2.15                                                                                                                                                                                                                                                                                                                                                                                                                                                                                                                                                                                                                                                                                                                                                                                                                                                                                                                                                                                                                                                                                                                                                                                                                                                                                                                                                                                                                                                                                                                                                                                                                                                                                                                                                                                                                                                                                                                                                                                                                                                                                                                                                                                    | 115.90    | 216.05                             | +ESI                      | AD2                | a         |          |                    |     |       |   |      |        |        |      |     |   |       |      |      |        |        |      |      |      |       |   |      |        |        |      |     |   |        |      |      |        |        |      |      |      |        |      |      |       |        |      |      |      |        |   |      |        |        |      |     |   |       |   |      |        |        |      |     |   |       |   |      |        |        |      |     |   |        |      |      |      |      |      |      |      |        |   |      |        |        |      |     |   |        |      |      |        |        |      |      |      |       |   |      |        |        |      |     |   |
| Lab 18    | N.D.                                                                                                                                                                                                                                                                | N.D.                                                                                                                                                                                                                                                                                                                                                                                                                                                                                                                                                                                                                                                                                                                                                                                                                                                                                                                                                                                                                                                                                                                                                                                                                                                                                                                                                                                                                                                                                                                                                                                                                                                                                                                                                                                                                                                                                                                                                                                                                                                                                                                                                                                    | N.D.      | N.D.                               | N.D.                      | N.D.               | N.D.      |          |                    |     |       |   |      |        |        |      |     |   |       |      |      |        |        |      |      |      |       |   |      |        |        |      |     |   |        |      |      |        |        |      |      |      |        |      |      |       |        |      |      |      |        |   |      |        |        |      |     |   |       |   |      |        |        |      |     |   |       |   |      |        |        |      |     |   |        |      |      |      |      |      |      |      |        |   |      |        |        |      |     |   |        |      |      |        |        |      |      |      |       |   |      |        |        |      |     |   |
| Lab 17    | 1                                                                                                                                                                                                                                                                   | 2.48                                                                                                                                                                                                                                                                                                                                                                                                                                                                                                                                                                                                                                                                                                                                                                                                                                                                                                                                                                                                                                                                                                                                                                                                                                                                                                                                                                                                                                                                                                                                                                                                                                                                                                                                                                                                                                                                                                                                                                                                                                                                                                                                                                                    | 114.50    | 216.05                             | +ESI                      | AD2                | a         |          |                    |     |       |   |      |        |        |      |     |   |       |      |      |        |        |      |      |      |       |   |      |        |        |      |     |   |        |      |      |        |        |      |      |      |        |      |      |       |        |      |      |      |        |   |      |        |        |      |     |   |       |   |      |        |        |      |     |   |       |   |      |        |        |      |     |   |        |      |      |      |      |      |      |      |        |   |      |        |        |      |     |   |        |      |      |        |        |      |      |      |       |   |      |        |        |      |     |   |
| Lab 10    | N.D.                                                                                                                                                                                                                                                                | N.D.                                                                                                                                                                                                                                                                                                                                                                                                                                                                                                                                                                                                                                                                                                                                                                                                                                                                                                                                                                                                                                                                                                                                                                                                                                                                                                                                                                                                                                                                                                                                                                                                                                                                                                                                                                                                                                                                                                                                                                                                                                                                                                                                                                                    | N.D.      | N.D.                               | N.D.                      | N.D.               | N.D.      |          |                    |     |       |   |      |        |        |      |     |   |       |      |      |        |        |      |      |      |       |   |      |        |        |      |     |   |        |      |      |        |        |      |      |      |        |      |      |       |        |      |      |      |        |   |      |        |        |      |     |   |       |   |      |        |        |      |     |   |       |   |      |        |        |      |     |   |        |      |      |      |      |      |      |      |        |   |      |        |        |      |     |   |        |      |      |        |        |      |      |      |       |   |      |        |        |      |     |   |
| Lab 7     | 2                                                                                                                                                                                                                                                                   | 7.65                                                                                                                                                                                                                                                                                                                                                                                                                                                                                                                                                                                                                                                                                                                                                                                                                                                                                                                                                                                                                                                                                                                                                                                                                                                                                                                                                                                                                                                                                                                                                                                                                                                                                                                                                                                                                                                                                                                                                                                                                                                                                                                                                                                    | 214.60    | 216.05                             | +ESI                      | AD1                | a         |          |                    |     |       |   |      |        |        |      |     |   |       |      |      |        |        |      |      |      |       |   |      |        |        |      |     |   |        |      |      |        |        |      |      |      |        |      |      |       |        |      |      |      |        |   |      |        |        |      |     |   |       |   |      |        |        |      |     |   |       |   |      |        |        |      |     |   |        |      |      |      |      |      |      |      |        |   |      |        |        |      |     |   |        |      |      |        |        |      |      |      |       |   |      |        |        |      |     |   |

| No.       | multiple comparison procedure plot                                                                                                                                                                            | RTI details                                                                                                                                                                                                                                                                                                                                                                                                                                                                                                                                                                                                                                                                                                                                                                                                                                                                                                                                                                                                                                                                                                                                                                                                                                                                                                                                                                                                                                                                                                                                                                                                                                                                                                                                                                                                                                                                                                                                                                                                                                                                                                                                                                                                        |           |                                    |                           |                    |           |          |                    |     |       |      |       |        |        |      |      |      |       |      |      |      |      |      |      |      |       |      |       |        |        |      |      |      |        |    |      |        |        |      |     |   |        |      |      |      |      |      |      |      |        |      |      |      |      |      |      |      |       |   |       |        |        |      |     |   |       |   |       |        |        |      |     |   |        |      |       |        |        |      |      |      |        |      |      |      |      |      |      |      |        |   |       |        |        |      |     |   |       |   |       |        |        |      |     |   |
|-----------|---------------------------------------------------------------------------------------------------------------------------------------------------------------------------------------------------------------|--------------------------------------------------------------------------------------------------------------------------------------------------------------------------------------------------------------------------------------------------------------------------------------------------------------------------------------------------------------------------------------------------------------------------------------------------------------------------------------------------------------------------------------------------------------------------------------------------------------------------------------------------------------------------------------------------------------------------------------------------------------------------------------------------------------------------------------------------------------------------------------------------------------------------------------------------------------------------------------------------------------------------------------------------------------------------------------------------------------------------------------------------------------------------------------------------------------------------------------------------------------------------------------------------------------------------------------------------------------------------------------------------------------------------------------------------------------------------------------------------------------------------------------------------------------------------------------------------------------------------------------------------------------------------------------------------------------------------------------------------------------------------------------------------------------------------------------------------------------------------------------------------------------------------------------------------------------------------------------------------------------------------------------------------------------------------------------------------------------------------------------------------------------------------------------------------------------------|-----------|------------------------------------|---------------------------|--------------------|-----------|----------|--------------------|-----|-------|------|-------|--------|--------|------|------|------|-------|------|------|------|------|------|------|------|-------|------|-------|--------|--------|------|------|------|--------|----|------|--------|--------|------|-----|---|--------|------|------|------|------|------|------|------|--------|------|------|------|------|------|------|------|-------|---|-------|--------|--------|------|-----|---|-------|---|-------|--------|--------|------|-----|---|--------|------|-------|--------|--------|------|------|------|--------|------|------|------|------|------|------|------|--------|---|-------|--------|--------|------|-----|---|-------|---|-------|--------|--------|------|-----|---|
| (6)       | <p style="text-align: center;"><b>Comparison of Exp. RTI values:<br/>Tris(1,3-dichloroisopropyl)phosphate</b></p> <p style="text-align: center;">No groups have means significantly different from Lab 04</p> | <table border="1" style="width: 100%; border-collapse: collapse;"> <thead> <tr> <th>Institute</th> <th>Level of identification confidence</th> <th>Exp. t<sub>R</sub> (min)</th> <th>Exp. RTI</th> <th>Pred. RTI</th> <th>ESI mode</th> <th>Application domain</th> <th>MCP</th> </tr> </thead> <tbody> <tr><td>Lab 6</td><td>N.D.</td><td>N.D.</td><td>N.D.</td><td>N.D.</td><td>N.D.</td><td>N.D.</td><td>N.D.</td></tr> <tr><td>Lab 5</td><td>N.D.</td><td>N.D.</td><td>N.D.</td><td>N.D.</td><td>N.D.</td><td>N.D.</td><td>N.D.</td></tr> <tr><td>Lab 4</td><td>2</td><td>13.44</td><td>750.73</td><td>877.93</td><td>+ESI</td><td>AD2</td><td>a</td></tr> <tr><td>Lab 12</td><td>2a</td><td>7.18</td><td>740.14</td><td>877.93</td><td>+ESI</td><td>AD2</td><td>a</td></tr> <tr><td>Lab 13</td><td>N.D.</td><td>N.D.</td><td>N.D.</td><td>N.D.</td><td>N.D.</td><td>N.D.</td><td>N.D.</td></tr> <tr><td>Lab 15</td><td>N.D.</td><td>N.D.</td><td>N.D.</td><td>N.D.</td><td>N.D.</td><td>N.D.</td><td>N.D.</td></tr> <tr><td>Lab 9</td><td>2</td><td>14.76</td><td>835.01</td><td>877.93</td><td>+ESI</td><td>AD1</td><td>a</td></tr> <tr><td>Lab 2</td><td>1</td><td>32.35</td><td>728.14</td><td>877.93</td><td>+ESI</td><td>AD2</td><td>a</td></tr> <tr><td>Lab 18</td><td>1</td><td>14.71</td><td>653.89</td><td>877.93</td><td>+ESI</td><td>AD3</td><td>a</td></tr> <tr><td>Lab 17</td><td>N.D.</td><td>N.D.</td><td>N.D.</td><td>N.D.</td><td>N.D.</td><td>N.D.</td><td>N.D.</td></tr> <tr><td>Lab 10</td><td>2</td><td>12.39</td><td>766.05</td><td>877.93</td><td>+ESI</td><td>AD2</td><td>a</td></tr> <tr><td>Lab 7</td><td>2</td><td>16.59</td><td>681.88</td><td>877.93</td><td>+ESI</td><td>AD3</td><td>a</td></tr> </tbody> </table> <p>AD1: Exp. &amp; Pred. t<sub>R</sub> are accepted for this candidate (box1)<br/> AD2: Although there is error, exp. &amp; pred. t<sub>R</sub> are accepted for this candidate (box2)<br/> AD3: Pred./Exp. t<sub>R</sub> are not reliable (high SR; use other verification tools (box3))<br/> N.D.: Not detected.<br/> All institutes have acceptable exp. RTI values and the difference is <b>not significant at 99% CIs</b> of the calibration curve.</p> | Institute | Level of identification confidence | Exp. t <sub>R</sub> (min) | Exp. RTI           | Pred. RTI | ESI mode | Application domain | MCP | Lab 6 | N.D. | N.D.  | N.D.   | N.D.   | N.D. | N.D. | N.D. | Lab 5 | N.D. | N.D. | N.D. | N.D. | N.D. | N.D. | N.D. | Lab 4 | 2    | 13.44 | 750.73 | 877.93 | +ESI | AD2  | a    | Lab 12 | 2a | 7.18 | 740.14 | 877.93 | +ESI | AD2 | a | Lab 13 | N.D. | N.D. | N.D. | N.D. | N.D. | N.D. | N.D. | Lab 15 | N.D. | N.D. | N.D. | N.D. | N.D. | N.D. | N.D. | Lab 9 | 2 | 14.76 | 835.01 | 877.93 | +ESI | AD1 | a | Lab 2 | 1 | 32.35 | 728.14 | 877.93 | +ESI | AD2 | a | Lab 18 | 1    | 14.71 | 653.89 | 877.93 | +ESI | AD3  | a    | Lab 17 | N.D. | N.D. | N.D. | N.D. | N.D. | N.D. | N.D. | Lab 10 | 2 | 12.39 | 766.05 | 877.93 | +ESI | AD2 | a | Lab 7 | 2 | 16.59 | 681.88 | 877.93 | +ESI | AD3 | a |
| Institute | Level of identification confidence                                                                                                                                                                            | Exp. t <sub>R</sub> (min)                                                                                                                                                                                                                                                                                                                                                                                                                                                                                                                                                                                                                                                                                                                                                                                                                                                                                                                                                                                                                                                                                                                                                                                                                                                                                                                                                                                                                                                                                                                                                                                                                                                                                                                                                                                                                                                                                                                                                                                                                                                                                                                                                                                          | Exp. RTI  | Pred. RTI                          | ESI mode                  | Application domain | MCP       |          |                    |     |       |      |       |        |        |      |      |      |       |      |      |      |      |      |      |      |       |      |       |        |        |      |      |      |        |    |      |        |        |      |     |   |        |      |      |      |      |      |      |      |        |      |      |      |      |      |      |      |       |   |       |        |        |      |     |   |       |   |       |        |        |      |     |   |        |      |       |        |        |      |      |      |        |      |      |      |      |      |      |      |        |   |       |        |        |      |     |   |       |   |       |        |        |      |     |   |
| Lab 6     | N.D.                                                                                                                                                                                                          | N.D.                                                                                                                                                                                                                                                                                                                                                                                                                                                                                                                                                                                                                                                                                                                                                                                                                                                                                                                                                                                                                                                                                                                                                                                                                                                                                                                                                                                                                                                                                                                                                                                                                                                                                                                                                                                                                                                                                                                                                                                                                                                                                                                                                                                                               | N.D.      | N.D.                               | N.D.                      | N.D.               | N.D.      |          |                    |     |       |      |       |        |        |      |      |      |       |      |      |      |      |      |      |      |       |      |       |        |        |      |      |      |        |    |      |        |        |      |     |   |        |      |      |      |      |      |      |      |        |      |      |      |      |      |      |      |       |   |       |        |        |      |     |   |       |   |       |        |        |      |     |   |        |      |       |        |        |      |      |      |        |      |      |      |      |      |      |      |        |   |       |        |        |      |     |   |       |   |       |        |        |      |     |   |
| Lab 5     | N.D.                                                                                                                                                                                                          | N.D.                                                                                                                                                                                                                                                                                                                                                                                                                                                                                                                                                                                                                                                                                                                                                                                                                                                                                                                                                                                                                                                                                                                                                                                                                                                                                                                                                                                                                                                                                                                                                                                                                                                                                                                                                                                                                                                                                                                                                                                                                                                                                                                                                                                                               | N.D.      | N.D.                               | N.D.                      | N.D.               | N.D.      |          |                    |     |       |      |       |        |        |      |      |      |       |      |      |      |      |      |      |      |       |      |       |        |        |      |      |      |        |    |      |        |        |      |     |   |        |      |      |      |      |      |      |      |        |      |      |      |      |      |      |      |       |   |       |        |        |      |     |   |       |   |       |        |        |      |     |   |        |      |       |        |        |      |      |      |        |      |      |      |      |      |      |      |        |   |       |        |        |      |     |   |       |   |       |        |        |      |     |   |
| Lab 4     | 2                                                                                                                                                                                                             | 13.44                                                                                                                                                                                                                                                                                                                                                                                                                                                                                                                                                                                                                                                                                                                                                                                                                                                                                                                                                                                                                                                                                                                                                                                                                                                                                                                                                                                                                                                                                                                                                                                                                                                                                                                                                                                                                                                                                                                                                                                                                                                                                                                                                                                                              | 750.73    | 877.93                             | +ESI                      | AD2                | a         |          |                    |     |       |      |       |        |        |      |      |      |       |      |      |      |      |      |      |      |       |      |       |        |        |      |      |      |        |    |      |        |        |      |     |   |        |      |      |      |      |      |      |      |        |      |      |      |      |      |      |      |       |   |       |        |        |      |     |   |       |   |       |        |        |      |     |   |        |      |       |        |        |      |      |      |        |      |      |      |      |      |      |      |        |   |       |        |        |      |     |   |       |   |       |        |        |      |     |   |
| Lab 12    | 2a                                                                                                                                                                                                            | 7.18                                                                                                                                                                                                                                                                                                                                                                                                                                                                                                                                                                                                                                                                                                                                                                                                                                                                                                                                                                                                                                                                                                                                                                                                                                                                                                                                                                                                                                                                                                                                                                                                                                                                                                                                                                                                                                                                                                                                                                                                                                                                                                                                                                                                               | 740.14    | 877.93                             | +ESI                      | AD2                | a         |          |                    |     |       |      |       |        |        |      |      |      |       |      |      |      |      |      |      |      |       |      |       |        |        |      |      |      |        |    |      |        |        |      |     |   |        |      |      |      |      |      |      |      |        |      |      |      |      |      |      |      |       |   |       |        |        |      |     |   |       |   |       |        |        |      |     |   |        |      |       |        |        |      |      |      |        |      |      |      |      |      |      |      |        |   |       |        |        |      |     |   |       |   |       |        |        |      |     |   |
| Lab 13    | N.D.                                                                                                                                                                                                          | N.D.                                                                                                                                                                                                                                                                                                                                                                                                                                                                                                                                                                                                                                                                                                                                                                                                                                                                                                                                                                                                                                                                                                                                                                                                                                                                                                                                                                                                                                                                                                                                                                                                                                                                                                                                                                                                                                                                                                                                                                                                                                                                                                                                                                                                               | N.D.      | N.D.                               | N.D.                      | N.D.               | N.D.      |          |                    |     |       |      |       |        |        |      |      |      |       |      |      |      |      |      |      |      |       |      |       |        |        |      |      |      |        |    |      |        |        |      |     |   |        |      |      |      |      |      |      |      |        |      |      |      |      |      |      |      |       |   |       |        |        |      |     |   |       |   |       |        |        |      |     |   |        |      |       |        |        |      |      |      |        |      |      |      |      |      |      |      |        |   |       |        |        |      |     |   |       |   |       |        |        |      |     |   |
| Lab 15    | N.D.                                                                                                                                                                                                          | N.D.                                                                                                                                                                                                                                                                                                                                                                                                                                                                                                                                                                                                                                                                                                                                                                                                                                                                                                                                                                                                                                                                                                                                                                                                                                                                                                                                                                                                                                                                                                                                                                                                                                                                                                                                                                                                                                                                                                                                                                                                                                                                                                                                                                                                               | N.D.      | N.D.                               | N.D.                      | N.D.               | N.D.      |          |                    |     |       |      |       |        |        |      |      |      |       |      |      |      |      |      |      |      |       |      |       |        |        |      |      |      |        |    |      |        |        |      |     |   |        |      |      |      |      |      |      |      |        |      |      |      |      |      |      |      |       |   |       |        |        |      |     |   |       |   |       |        |        |      |     |   |        |      |       |        |        |      |      |      |        |      |      |      |      |      |      |      |        |   |       |        |        |      |     |   |       |   |       |        |        |      |     |   |
| Lab 9     | 2                                                                                                                                                                                                             | 14.76                                                                                                                                                                                                                                                                                                                                                                                                                                                                                                                                                                                                                                                                                                                                                                                                                                                                                                                                                                                                                                                                                                                                                                                                                                                                                                                                                                                                                                                                                                                                                                                                                                                                                                                                                                                                                                                                                                                                                                                                                                                                                                                                                                                                              | 835.01    | 877.93                             | +ESI                      | AD1                | a         |          |                    |     |       |      |       |        |        |      |      |      |       |      |      |      |      |      |      |      |       |      |       |        |        |      |      |      |        |    |      |        |        |      |     |   |        |      |      |      |      |      |      |      |        |      |      |      |      |      |      |      |       |   |       |        |        |      |     |   |       |   |       |        |        |      |     |   |        |      |       |        |        |      |      |      |        |      |      |      |      |      |      |      |        |   |       |        |        |      |     |   |       |   |       |        |        |      |     |   |
| Lab 2     | 1                                                                                                                                                                                                             | 32.35                                                                                                                                                                                                                                                                                                                                                                                                                                                                                                                                                                                                                                                                                                                                                                                                                                                                                                                                                                                                                                                                                                                                                                                                                                                                                                                                                                                                                                                                                                                                                                                                                                                                                                                                                                                                                                                                                                                                                                                                                                                                                                                                                                                                              | 728.14    | 877.93                             | +ESI                      | AD2                | a         |          |                    |     |       |      |       |        |        |      |      |      |       |      |      |      |      |      |      |      |       |      |       |        |        |      |      |      |        |    |      |        |        |      |     |   |        |      |      |      |      |      |      |      |        |      |      |      |      |      |      |      |       |   |       |        |        |      |     |   |       |   |       |        |        |      |     |   |        |      |       |        |        |      |      |      |        |      |      |      |      |      |      |      |        |   |       |        |        |      |     |   |       |   |       |        |        |      |     |   |
| Lab 18    | 1                                                                                                                                                                                                             | 14.71                                                                                                                                                                                                                                                                                                                                                                                                                                                                                                                                                                                                                                                                                                                                                                                                                                                                                                                                                                                                                                                                                                                                                                                                                                                                                                                                                                                                                                                                                                                                                                                                                                                                                                                                                                                                                                                                                                                                                                                                                                                                                                                                                                                                              | 653.89    | 877.93                             | +ESI                      | AD3                | a         |          |                    |     |       |      |       |        |        |      |      |      |       |      |      |      |      |      |      |      |       |      |       |        |        |      |      |      |        |    |      |        |        |      |     |   |        |      |      |      |      |      |      |      |        |      |      |      |      |      |      |      |       |   |       |        |        |      |     |   |       |   |       |        |        |      |     |   |        |      |       |        |        |      |      |      |        |      |      |      |      |      |      |      |        |   |       |        |        |      |     |   |       |   |       |        |        |      |     |   |
| Lab 17    | N.D.                                                                                                                                                                                                          | N.D.                                                                                                                                                                                                                                                                                                                                                                                                                                                                                                                                                                                                                                                                                                                                                                                                                                                                                                                                                                                                                                                                                                                                                                                                                                                                                                                                                                                                                                                                                                                                                                                                                                                                                                                                                                                                                                                                                                                                                                                                                                                                                                                                                                                                               | N.D.      | N.D.                               | N.D.                      | N.D.               | N.D.      |          |                    |     |       |      |       |        |        |      |      |      |       |      |      |      |      |      |      |      |       |      |       |        |        |      |      |      |        |    |      |        |        |      |     |   |        |      |      |      |      |      |      |      |        |      |      |      |      |      |      |      |       |   |       |        |        |      |     |   |       |   |       |        |        |      |     |   |        |      |       |        |        |      |      |      |        |      |      |      |      |      |      |      |        |   |       |        |        |      |     |   |       |   |       |        |        |      |     |   |
| Lab 10    | 2                                                                                                                                                                                                             | 12.39                                                                                                                                                                                                                                                                                                                                                                                                                                                                                                                                                                                                                                                                                                                                                                                                                                                                                                                                                                                                                                                                                                                                                                                                                                                                                                                                                                                                                                                                                                                                                                                                                                                                                                                                                                                                                                                                                                                                                                                                                                                                                                                                                                                                              | 766.05    | 877.93                             | +ESI                      | AD2                | a         |          |                    |     |       |      |       |        |        |      |      |      |       |      |      |      |      |      |      |      |       |      |       |        |        |      |      |      |        |    |      |        |        |      |     |   |        |      |      |      |      |      |      |      |        |      |      |      |      |      |      |      |       |   |       |        |        |      |     |   |       |   |       |        |        |      |     |   |        |      |       |        |        |      |      |      |        |      |      |      |      |      |      |      |        |   |       |        |        |      |     |   |       |   |       |        |        |      |     |   |
| Lab 7     | 2                                                                                                                                                                                                             | 16.59                                                                                                                                                                                                                                                                                                                                                                                                                                                                                                                                                                                                                                                                                                                                                                                                                                                                                                                                                                                                                                                                                                                                                                                                                                                                                                                                                                                                                                                                                                                                                                                                                                                                                                                                                                                                                                                                                                                                                                                                                                                                                                                                                                                                              | 681.88    | 877.93                             | +ESI                      | AD3                | a         |          |                    |     |       |      |       |        |        |      |      |      |       |      |      |      |      |      |      |      |       |      |       |        |        |      |      |      |        |    |      |        |        |      |     |   |        |      |      |      |      |      |      |      |        |      |      |      |      |      |      |      |       |   |       |        |        |      |     |   |       |   |       |        |        |      |     |   |        |      |       |        |        |      |      |      |        |      |      |      |      |      |      |      |        |   |       |        |        |      |     |   |       |   |       |        |        |      |     |   |
| (7)       | <p style="text-align: center;"><b>Comparison of Exp. RTI values: Oxybenzone</b></p> <p style="text-align: center;">No groups have means significantly different from Lab 06</p>                               | <table border="1" style="width: 100%; border-collapse: collapse;"> <thead> <tr> <th>Institute</th> <th>Level of identification confidence</th> <th>Exp. t<sub>R</sub> (min)</th> <th>Exp. RTI</th> <th>Pred. RTI</th> <th>ESI mode</th> <th>Application domain</th> <th>MCP</th> </tr> </thead> <tbody> <tr><td>Lab 6</td><td>1</td><td>10.94</td><td>735.99</td><td>641.82</td><td>+ESI</td><td>AD1</td><td>a</td></tr> <tr><td>Lab 5</td><td>N.D.</td><td>N.D.</td><td>N.D.</td><td>N.D.</td><td>N.D.</td><td>N.D.</td><td>N.D.</td></tr> <tr><td>Lab 4</td><td>N.D.</td><td>N.D.</td><td>N.D.</td><td>N.D.</td><td>N.D.</td><td>N.D.</td><td>N.D.</td></tr> <tr><td>Lab 12</td><td>1</td><td>7.05</td><td>725.86</td><td>641.82</td><td>+ESI</td><td>AD1</td><td>a</td></tr> <tr><td>Lab 13</td><td>N.D.</td><td>N.D.</td><td>N.D.</td><td>N.D.</td><td>N.D.</td><td>N.D.</td><td>N.D.</td></tr> <tr><td>Lab 15</td><td>N.D.</td><td>N.D.</td><td>N.D.</td><td>N.D.</td><td>N.D.</td><td>N.D.</td><td>N.D.</td></tr> <tr><td>Lab 9</td><td>2</td><td>14.00</td><td>784.13</td><td>641.82</td><td>+ESI</td><td>AD2</td><td>a</td></tr> <tr><td>Lab 2</td><td>2</td><td>29.39</td><td>668.13</td><td>641.82</td><td>+ESI</td><td>AD1</td><td>a</td></tr> <tr><td>Lab 18</td><td>N.D.</td><td>N.D.</td><td>N.D.</td><td>N.D.</td><td>N.D.</td><td>N.D.</td><td>N.D.</td></tr> <tr><td>Lab 17</td><td>N.D.</td><td>N.D.</td><td>N.D.</td><td>N.D.</td><td>N.D.</td><td>N.D.</td><td>N.D.</td></tr> <tr><td>Lab 10</td><td>1</td><td>11.83</td><td>730.58</td><td>641.82</td><td>+ESI</td><td>AD1</td><td>a</td></tr> <tr><td>Lab 7</td><td>2</td><td>16.56</td><td>679.89</td><td>641.82</td><td>+ESI</td><td>AD1</td><td>a</td></tr> </tbody> </table> <p>AD1: Exp. &amp; Pred. t<sub>R</sub> are accepted for this candidate (box1)<br/> AD2: Although there is error, exp. &amp; pred. t<sub>R</sub> are accepted for this candidate (box2)<br/> N.D.: Not detected.<br/> All institutes have acceptable exp. RTI values and the difference is <b>not significant at 99% CIs</b> of the calibration curve.</p>                                                                                                   | Institute | Level of identification confidence | Exp. t <sub>R</sub> (min) | Exp. RTI           | Pred. RTI | ESI mode | Application domain | MCP | Lab 6 | 1    | 10.94 | 735.99 | 641.82 | +ESI | AD1  | a    | Lab 5 | N.D. | N.D. | N.D. | N.D. | N.D. | N.D. | N.D. | Lab 4 | N.D. | N.D.  | N.D.   | N.D.   | N.D. | N.D. | N.D. | Lab 12 | 1  | 7.05 | 725.86 | 641.82 | +ESI | AD1 | a | Lab 13 | N.D. | N.D. | N.D. | N.D. | N.D. | N.D. | N.D. | Lab 15 | N.D. | N.D. | N.D. | N.D. | N.D. | N.D. | N.D. | Lab 9 | 2 | 14.00 | 784.13 | 641.82 | +ESI | AD2 | a | Lab 2 | 2 | 29.39 | 668.13 | 641.82 | +ESI | AD1 | a | Lab 18 | N.D. | N.D.  | N.D.   | N.D.   | N.D. | N.D. | N.D. | Lab 17 | N.D. | N.D. | N.D. | N.D. | N.D. | N.D. | N.D. | Lab 10 | 1 | 11.83 | 730.58 | 641.82 | +ESI | AD1 | a | Lab 7 | 2 | 16.56 | 679.89 | 641.82 | +ESI | AD1 | a |
| Institute | Level of identification confidence                                                                                                                                                                            | Exp. t <sub>R</sub> (min)                                                                                                                                                                                                                                                                                                                                                                                                                                                                                                                                                                                                                                                                                                                                                                                                                                                                                                                                                                                                                                                                                                                                                                                                                                                                                                                                                                                                                                                                                                                                                                                                                                                                                                                                                                                                                                                                                                                                                                                                                                                                                                                                                                                          | Exp. RTI  | Pred. RTI                          | ESI mode                  | Application domain | MCP       |          |                    |     |       |      |       |        |        |      |      |      |       |      |      |      |      |      |      |      |       |      |       |        |        |      |      |      |        |    |      |        |        |      |     |   |        |      |      |      |      |      |      |      |        |      |      |      |      |      |      |      |       |   |       |        |        |      |     |   |       |   |       |        |        |      |     |   |        |      |       |        |        |      |      |      |        |      |      |      |      |      |      |      |        |   |       |        |        |      |     |   |       |   |       |        |        |      |     |   |
| Lab 6     | 1                                                                                                                                                                                                             | 10.94                                                                                                                                                                                                                                                                                                                                                                                                                                                                                                                                                                                                                                                                                                                                                                                                                                                                                                                                                                                                                                                                                                                                                                                                                                                                                                                                                                                                                                                                                                                                                                                                                                                                                                                                                                                                                                                                                                                                                                                                                                                                                                                                                                                                              | 735.99    | 641.82                             | +ESI                      | AD1                | a         |          |                    |     |       |      |       |        |        |      |      |      |       |      |      |      |      |      |      |      |       |      |       |        |        |      |      |      |        |    |      |        |        |      |     |   |        |      |      |      |      |      |      |      |        |      |      |      |      |      |      |      |       |   |       |        |        |      |     |   |       |   |       |        |        |      |     |   |        |      |       |        |        |      |      |      |        |      |      |      |      |      |      |      |        |   |       |        |        |      |     |   |       |   |       |        |        |      |     |   |
| Lab 5     | N.D.                                                                                                                                                                                                          | N.D.                                                                                                                                                                                                                                                                                                                                                                                                                                                                                                                                                                                                                                                                                                                                                                                                                                                                                                                                                                                                                                                                                                                                                                                                                                                                                                                                                                                                                                                                                                                                                                                                                                                                                                                                                                                                                                                                                                                                                                                                                                                                                                                                                                                                               | N.D.      | N.D.                               | N.D.                      | N.D.               | N.D.      |          |                    |     |       |      |       |        |        |      |      |      |       |      |      |      |      |      |      |      |       |      |       |        |        |      |      |      |        |    |      |        |        |      |     |   |        |      |      |      |      |      |      |      |        |      |      |      |      |      |      |      |       |   |       |        |        |      |     |   |       |   |       |        |        |      |     |   |        |      |       |        |        |      |      |      |        |      |      |      |      |      |      |      |        |   |       |        |        |      |     |   |       |   |       |        |        |      |     |   |
| Lab 4     | N.D.                                                                                                                                                                                                          | N.D.                                                                                                                                                                                                                                                                                                                                                                                                                                                                                                                                                                                                                                                                                                                                                                                                                                                                                                                                                                                                                                                                                                                                                                                                                                                                                                                                                                                                                                                                                                                                                                                                                                                                                                                                                                                                                                                                                                                                                                                                                                                                                                                                                                                                               | N.D.      | N.D.                               | N.D.                      | N.D.               | N.D.      |          |                    |     |       |      |       |        |        |      |      |      |       |      |      |      |      |      |      |      |       |      |       |        |        |      |      |      |        |    |      |        |        |      |     |   |        |      |      |      |      |      |      |      |        |      |      |      |      |      |      |      |       |   |       |        |        |      |     |   |       |   |       |        |        |      |     |   |        |      |       |        |        |      |      |      |        |      |      |      |      |      |      |      |        |   |       |        |        |      |     |   |       |   |       |        |        |      |     |   |
| Lab 12    | 1                                                                                                                                                                                                             | 7.05                                                                                                                                                                                                                                                                                                                                                                                                                                                                                                                                                                                                                                                                                                                                                                                                                                                                                                                                                                                                                                                                                                                                                                                                                                                                                                                                                                                                                                                                                                                                                                                                                                                                                                                                                                                                                                                                                                                                                                                                                                                                                                                                                                                                               | 725.86    | 641.82                             | +ESI                      | AD1                | a         |          |                    |     |       |      |       |        |        |      |      |      |       |      |      |      |      |      |      |      |       |      |       |        |        |      |      |      |        |    |      |        |        |      |     |   |        |      |      |      |      |      |      |      |        |      |      |      |      |      |      |      |       |   |       |        |        |      |     |   |       |   |       |        |        |      |     |   |        |      |       |        |        |      |      |      |        |      |      |      |      |      |      |      |        |   |       |        |        |      |     |   |       |   |       |        |        |      |     |   |
| Lab 13    | N.D.                                                                                                                                                                                                          | N.D.                                                                                                                                                                                                                                                                                                                                                                                                                                                                                                                                                                                                                                                                                                                                                                                                                                                                                                                                                                                                                                                                                                                                                                                                                                                                                                                                                                                                                                                                                                                                                                                                                                                                                                                                                                                                                                                                                                                                                                                                                                                                                                                                                                                                               | N.D.      | N.D.                               | N.D.                      | N.D.               | N.D.      |          |                    |     |       |      |       |        |        |      |      |      |       |      |      |      |      |      |      |      |       |      |       |        |        |      |      |      |        |    |      |        |        |      |     |   |        |      |      |      |      |      |      |      |        |      |      |      |      |      |      |      |       |   |       |        |        |      |     |   |       |   |       |        |        |      |     |   |        |      |       |        |        |      |      |      |        |      |      |      |      |      |      |      |        |   |       |        |        |      |     |   |       |   |       |        |        |      |     |   |
| Lab 15    | N.D.                                                                                                                                                                                                          | N.D.                                                                                                                                                                                                                                                                                                                                                                                                                                                                                                                                                                                                                                                                                                                                                                                                                                                                                                                                                                                                                                                                                                                                                                                                                                                                                                                                                                                                                                                                                                                                                                                                                                                                                                                                                                                                                                                                                                                                                                                                                                                                                                                                                                                                               | N.D.      | N.D.                               | N.D.                      | N.D.               | N.D.      |          |                    |     |       |      |       |        |        |      |      |      |       |      |      |      |      |      |      |      |       |      |       |        |        |      |      |      |        |    |      |        |        |      |     |   |        |      |      |      |      |      |      |      |        |      |      |      |      |      |      |      |       |   |       |        |        |      |     |   |       |   |       |        |        |      |     |   |        |      |       |        |        |      |      |      |        |      |      |      |      |      |      |      |        |   |       |        |        |      |     |   |       |   |       |        |        |      |     |   |
| Lab 9     | 2                                                                                                                                                                                                             | 14.00                                                                                                                                                                                                                                                                                                                                                                                                                                                                                                                                                                                                                                                                                                                                                                                                                                                                                                                                                                                                                                                                                                                                                                                                                                                                                                                                                                                                                                                                                                                                                                                                                                                                                                                                                                                                                                                                                                                                                                                                                                                                                                                                                                                                              | 784.13    | 641.82                             | +ESI                      | AD2                | a         |          |                    |     |       |      |       |        |        |      |      |      |       |      |      |      |      |      |      |      |       |      |       |        |        |      |      |      |        |    |      |        |        |      |     |   |        |      |      |      |      |      |      |      |        |      |      |      |      |      |      |      |       |   |       |        |        |      |     |   |       |   |       |        |        |      |     |   |        |      |       |        |        |      |      |      |        |      |      |      |      |      |      |      |        |   |       |        |        |      |     |   |       |   |       |        |        |      |     |   |
| Lab 2     | 2                                                                                                                                                                                                             | 29.39                                                                                                                                                                                                                                                                                                                                                                                                                                                                                                                                                                                                                                                                                                                                                                                                                                                                                                                                                                                                                                                                                                                                                                                                                                                                                                                                                                                                                                                                                                                                                                                                                                                                                                                                                                                                                                                                                                                                                                                                                                                                                                                                                                                                              | 668.13    | 641.82                             | +ESI                      | AD1                | a         |          |                    |     |       |      |       |        |        |      |      |      |       |      |      |      |      |      |      |      |       |      |       |        |        |      |      |      |        |    |      |        |        |      |     |   |        |      |      |      |      |      |      |      |        |      |      |      |      |      |      |      |       |   |       |        |        |      |     |   |       |   |       |        |        |      |     |   |        |      |       |        |        |      |      |      |        |      |      |      |      |      |      |      |        |   |       |        |        |      |     |   |       |   |       |        |        |      |     |   |
| Lab 18    | N.D.                                                                                                                                                                                                          | N.D.                                                                                                                                                                                                                                                                                                                                                                                                                                                                                                                                                                                                                                                                                                                                                                                                                                                                                                                                                                                                                                                                                                                                                                                                                                                                                                                                                                                                                                                                                                                                                                                                                                                                                                                                                                                                                                                                                                                                                                                                                                                                                                                                                                                                               | N.D.      | N.D.                               | N.D.                      | N.D.               | N.D.      |          |                    |     |       |      |       |        |        |      |      |      |       |      |      |      |      |      |      |      |       |      |       |        |        |      |      |      |        |    |      |        |        |      |     |   |        |      |      |      |      |      |      |      |        |      |      |      |      |      |      |      |       |   |       |        |        |      |     |   |       |   |       |        |        |      |     |   |        |      |       |        |        |      |      |      |        |      |      |      |      |      |      |      |        |   |       |        |        |      |     |   |       |   |       |        |        |      |     |   |
| Lab 17    | N.D.                                                                                                                                                                                                          | N.D.                                                                                                                                                                                                                                                                                                                                                                                                                                                                                                                                                                                                                                                                                                                                                                                                                                                                                                                                                                                                                                                                                                                                                                                                                                                                                                                                                                                                                                                                                                                                                                                                                                                                                                                                                                                                                                                                                                                                                                                                                                                                                                                                                                                                               | N.D.      | N.D.                               | N.D.                      | N.D.               | N.D.      |          |                    |     |       |      |       |        |        |      |      |      |       |      |      |      |      |      |      |      |       |      |       |        |        |      |      |      |        |    |      |        |        |      |     |   |        |      |      |      |      |      |      |      |        |      |      |      |      |      |      |      |       |   |       |        |        |      |     |   |       |   |       |        |        |      |     |   |        |      |       |        |        |      |      |      |        |      |      |      |      |      |      |      |        |   |       |        |        |      |     |   |       |   |       |        |        |      |     |   |
| Lab 10    | 1                                                                                                                                                                                                             | 11.83                                                                                                                                                                                                                                                                                                                                                                                                                                                                                                                                                                                                                                                                                                                                                                                                                                                                                                                                                                                                                                                                                                                                                                                                                                                                                                                                                                                                                                                                                                                                                                                                                                                                                                                                                                                                                                                                                                                                                                                                                                                                                                                                                                                                              | 730.58    | 641.82                             | +ESI                      | AD1                | a         |          |                    |     |       |      |       |        |        |      |      |      |       |      |      |      |      |      |      |      |       |      |       |        |        |      |      |      |        |    |      |        |        |      |     |   |        |      |      |      |      |      |      |      |        |      |      |      |      |      |      |      |       |   |       |        |        |      |     |   |       |   |       |        |        |      |     |   |        |      |       |        |        |      |      |      |        |      |      |      |      |      |      |      |        |   |       |        |        |      |     |   |       |   |       |        |        |      |     |   |
| Lab 7     | 2                                                                                                                                                                                                             | 16.56                                                                                                                                                                                                                                                                                                                                                                                                                                                                                                                                                                                                                                                                                                                                                                                                                                                                                                                                                                                                                                                                                                                                                                                                                                                                                                                                                                                                                                                                                                                                                                                                                                                                                                                                                                                                                                                                                                                                                                                                                                                                                                                                                                                                              | 679.89    | 641.82                             | +ESI                      | AD1                | a         |          |                    |     |       |      |       |        |        |      |      |      |       |      |      |      |      |      |      |      |       |      |       |        |        |      |      |      |        |    |      |        |        |      |     |   |        |      |      |      |      |      |      |      |        |      |      |      |      |      |      |      |       |   |       |        |        |      |     |   |       |   |       |        |        |      |     |   |        |      |       |        |        |      |      |      |        |      |      |      |      |      |      |      |        |   |       |        |        |      |     |   |       |   |       |        |        |      |     |   |

| No.       | multiple comparison procedure plot                                                                                                                                                                 | RTI details                                                                                                                                                                                                                                                                                                                                                                                                                                                                                                                                                                                                                                                                                                                                                                                                                                                                                                                                                                                                                                                                                                                                                                                                                                                                                                                                                                                                                                                                                                                                                                                                                                                                                                                                                                                                                                                                                                                                                                                                                                                     |           |                                    |                           |                    |           |          |                    |     |       |      |       |        |        |      |      |      |       |      |      |      |      |      |      |      |       |      |      |      |      |      |      |      |        |      |      |        |        |      |      |      |        |      |       |        |        |      |      |      |        |   |      |        |        |      |     |   |       |      |       |        |        |      |      |      |       |      |       |        |        |      |      |      |        |      |      |        |        |      |      |      |        |      |      |      |      |      |      |      |        |      |      |        |        |      |      |      |       |      |      |      |      |      |      |      |
|-----------|----------------------------------------------------------------------------------------------------------------------------------------------------------------------------------------------------|-----------------------------------------------------------------------------------------------------------------------------------------------------------------------------------------------------------------------------------------------------------------------------------------------------------------------------------------------------------------------------------------------------------------------------------------------------------------------------------------------------------------------------------------------------------------------------------------------------------------------------------------------------------------------------------------------------------------------------------------------------------------------------------------------------------------------------------------------------------------------------------------------------------------------------------------------------------------------------------------------------------------------------------------------------------------------------------------------------------------------------------------------------------------------------------------------------------------------------------------------------------------------------------------------------------------------------------------------------------------------------------------------------------------------------------------------------------------------------------------------------------------------------------------------------------------------------------------------------------------------------------------------------------------------------------------------------------------------------------------------------------------------------------------------------------------------------------------------------------------------------------------------------------------------------------------------------------------------------------------------------------------------------------------------------------------|-----------|------------------------------------|---------------------------|--------------------|-----------|----------|--------------------|-----|-------|------|-------|--------|--------|------|------|------|-------|------|------|------|------|------|------|------|-------|------|------|------|------|------|------|------|--------|------|------|--------|--------|------|------|------|--------|------|-------|--------|--------|------|------|------|--------|---|------|--------|--------|------|-----|---|-------|------|-------|--------|--------|------|------|------|-------|------|-------|--------|--------|------|------|------|--------|------|------|--------|--------|------|------|------|--------|------|------|------|------|------|------|------|--------|------|------|--------|--------|------|------|------|-------|------|------|------|------|------|------|------|
| (8)       | <p style="text-align: center;"><b>Comparison of Exp. RTI values: Dibutyl phtalate</b></p> <p style="text-align: center;">No groups have means significantly different from Lab 06</p>              | <table border="1"> <thead> <tr> <th>Institute</th> <th>Level of identification confidence</th> <th>Exp. t<sub>R</sub> (min)</th> <th>Exp. RTI</th> <th>Pred. RTI</th> <th>ESI mode</th> <th>Application domain</th> <th>MCP</th> </tr> </thead> <tbody> <tr><td>Lab 6</td><td>1</td><td>11.88</td><td>807.27</td><td>737.11</td><td>+ESI</td><td>AD1</td><td>a</td></tr> <tr><td>Lab 5</td><td>N.D.</td><td>N.D.</td><td>N.D.</td><td>N.D.</td><td>N.D.</td><td>N.D.</td><td>N.D.</td></tr> <tr><td>Lab 4</td><td>N.D.</td><td>N.D.</td><td>N.D.</td><td>N.D.</td><td>N.D.</td><td>N.D.</td><td>N.D.</td></tr> <tr><td>Lab 12</td><td>N.D.</td><td>N.D.</td><td>N.D.</td><td>N.D.</td><td>N.D.</td><td>N.D.</td><td>N.D.</td></tr> <tr><td>Lab 13</td><td>N.D.</td><td>N.D.</td><td>N.D.</td><td>N.D.</td><td>N.D.</td><td>N.D.</td><td>N.D.</td></tr> <tr><td>Lab 15</td><td>1</td><td>9.66</td><td>800.98</td><td>737.11</td><td>+ESI</td><td>AD1</td><td>a</td></tr> <tr><td>Lab 9</td><td>2</td><td>13.01</td><td>717.68</td><td>737.11</td><td>+ESI</td><td>AD1</td><td>a</td></tr> <tr><td>Lab 2</td><td>1</td><td>35.49</td><td>791.80</td><td>737.11</td><td>+ESI</td><td>AD1</td><td>a</td></tr> <tr><td>Lab 18</td><td>N.D.</td><td>N.D.</td><td>N.D.</td><td>N.D.</td><td>N.D.</td><td>N.D.</td><td>N.D.</td></tr> <tr><td>Lab 17</td><td>N.D.</td><td>N.D.</td><td>N.D.</td><td>N.D.</td><td>N.D.</td><td>N.D.</td><td>N.D.</td></tr> <tr><td>Lab 10</td><td>N.D.</td><td>N.D.</td><td>N.D.</td><td>N.D.</td><td>N.D.</td><td>N.D.</td><td>N.D.</td></tr> <tr><td>Lab 7</td><td>N.D.</td><td>N.D.</td><td>N.D.</td><td>N.D.</td><td>N.D.</td><td>N.D.</td><td>N.D.</td></tr> </tbody> </table> <p>AD1: Exp. &amp; Pred. t<sub>R</sub> are accepted for this candidate (box1)<br/> N.D.: Not detected.<br/> All institutes have acceptable exp. RTI values and the difference is <b>not significant at 99% CIs</b> of the calibration curve.</p>                                                                                                     | Institute | Level of identification confidence | Exp. t <sub>R</sub> (min) | Exp. RTI           | Pred. RTI | ESI mode | Application domain | MCP | Lab 6 | 1    | 11.88 | 807.27 | 737.11 | +ESI | AD1  | a    | Lab 5 | N.D. | N.D. | N.D. | N.D. | N.D. | N.D. | N.D. | Lab 4 | N.D. | N.D. | N.D. | N.D. | N.D. | N.D. | N.D. | Lab 12 | N.D. | N.D. | N.D.   | N.D.   | N.D. | N.D. | N.D. | Lab 13 | N.D. | N.D.  | N.D.   | N.D.   | N.D. | N.D. | N.D. | Lab 15 | 1 | 9.66 | 800.98 | 737.11 | +ESI | AD1 | a | Lab 9 | 2    | 13.01 | 717.68 | 737.11 | +ESI | AD1  | a    | Lab 2 | 1    | 35.49 | 791.80 | 737.11 | +ESI | AD1  | a    | Lab 18 | N.D. | N.D. | N.D.   | N.D.   | N.D. | N.D. | N.D. | Lab 17 | N.D. | N.D. | N.D. | N.D. | N.D. | N.D. | N.D. | Lab 10 | N.D. | N.D. | N.D.   | N.D.   | N.D. | N.D. | N.D. | Lab 7 | N.D. | N.D. | N.D. | N.D. | N.D. | N.D. | N.D. |
| Institute | Level of identification confidence                                                                                                                                                                 | Exp. t <sub>R</sub> (min)                                                                                                                                                                                                                                                                                                                                                                                                                                                                                                                                                                                                                                                                                                                                                                                                                                                                                                                                                                                                                                                                                                                                                                                                                                                                                                                                                                                                                                                                                                                                                                                                                                                                                                                                                                                                                                                                                                                                                                                                                                       | Exp. RTI  | Pred. RTI                          | ESI mode                  | Application domain | MCP       |          |                    |     |       |      |       |        |        |      |      |      |       |      |      |      |      |      |      |      |       |      |      |      |      |      |      |      |        |      |      |        |        |      |      |      |        |      |       |        |        |      |      |      |        |   |      |        |        |      |     |   |       |      |       |        |        |      |      |      |       |      |       |        |        |      |      |      |        |      |      |        |        |      |      |      |        |      |      |      |      |      |      |      |        |      |      |        |        |      |      |      |       |      |      |      |      |      |      |      |
| Lab 6     | 1                                                                                                                                                                                                  | 11.88                                                                                                                                                                                                                                                                                                                                                                                                                                                                                                                                                                                                                                                                                                                                                                                                                                                                                                                                                                                                                                                                                                                                                                                                                                                                                                                                                                                                                                                                                                                                                                                                                                                                                                                                                                                                                                                                                                                                                                                                                                                           | 807.27    | 737.11                             | +ESI                      | AD1                | a         |          |                    |     |       |      |       |        |        |      |      |      |       |      |      |      |      |      |      |      |       |      |      |      |      |      |      |      |        |      |      |        |        |      |      |      |        |      |       |        |        |      |      |      |        |   |      |        |        |      |     |   |       |      |       |        |        |      |      |      |       |      |       |        |        |      |      |      |        |      |      |        |        |      |      |      |        |      |      |      |      |      |      |      |        |      |      |        |        |      |      |      |       |      |      |      |      |      |      |      |
| Lab 5     | N.D.                                                                                                                                                                                               | N.D.                                                                                                                                                                                                                                                                                                                                                                                                                                                                                                                                                                                                                                                                                                                                                                                                                                                                                                                                                                                                                                                                                                                                                                                                                                                                                                                                                                                                                                                                                                                                                                                                                                                                                                                                                                                                                                                                                                                                                                                                                                                            | N.D.      | N.D.                               | N.D.                      | N.D.               | N.D.      |          |                    |     |       |      |       |        |        |      |      |      |       |      |      |      |      |      |      |      |       |      |      |      |      |      |      |      |        |      |      |        |        |      |      |      |        |      |       |        |        |      |      |      |        |   |      |        |        |      |     |   |       |      |       |        |        |      |      |      |       |      |       |        |        |      |      |      |        |      |      |        |        |      |      |      |        |      |      |      |      |      |      |      |        |      |      |        |        |      |      |      |       |      |      |      |      |      |      |      |
| Lab 4     | N.D.                                                                                                                                                                                               | N.D.                                                                                                                                                                                                                                                                                                                                                                                                                                                                                                                                                                                                                                                                                                                                                                                                                                                                                                                                                                                                                                                                                                                                                                                                                                                                                                                                                                                                                                                                                                                                                                                                                                                                                                                                                                                                                                                                                                                                                                                                                                                            | N.D.      | N.D.                               | N.D.                      | N.D.               | N.D.      |          |                    |     |       |      |       |        |        |      |      |      |       |      |      |      |      |      |      |      |       |      |      |      |      |      |      |      |        |      |      |        |        |      |      |      |        |      |       |        |        |      |      |      |        |   |      |        |        |      |     |   |       |      |       |        |        |      |      |      |       |      |       |        |        |      |      |      |        |      |      |        |        |      |      |      |        |      |      |      |      |      |      |      |        |      |      |        |        |      |      |      |       |      |      |      |      |      |      |      |
| Lab 12    | N.D.                                                                                                                                                                                               | N.D.                                                                                                                                                                                                                                                                                                                                                                                                                                                                                                                                                                                                                                                                                                                                                                                                                                                                                                                                                                                                                                                                                                                                                                                                                                                                                                                                                                                                                                                                                                                                                                                                                                                                                                                                                                                                                                                                                                                                                                                                                                                            | N.D.      | N.D.                               | N.D.                      | N.D.               | N.D.      |          |                    |     |       |      |       |        |        |      |      |      |       |      |      |      |      |      |      |      |       |      |      |      |      |      |      |      |        |      |      |        |        |      |      |      |        |      |       |        |        |      |      |      |        |   |      |        |        |      |     |   |       |      |       |        |        |      |      |      |       |      |       |        |        |      |      |      |        |      |      |        |        |      |      |      |        |      |      |      |      |      |      |      |        |      |      |        |        |      |      |      |       |      |      |      |      |      |      |      |
| Lab 13    | N.D.                                                                                                                                                                                               | N.D.                                                                                                                                                                                                                                                                                                                                                                                                                                                                                                                                                                                                                                                                                                                                                                                                                                                                                                                                                                                                                                                                                                                                                                                                                                                                                                                                                                                                                                                                                                                                                                                                                                                                                                                                                                                                                                                                                                                                                                                                                                                            | N.D.      | N.D.                               | N.D.                      | N.D.               | N.D.      |          |                    |     |       |      |       |        |        |      |      |      |       |      |      |      |      |      |      |      |       |      |      |      |      |      |      |      |        |      |      |        |        |      |      |      |        |      |       |        |        |      |      |      |        |   |      |        |        |      |     |   |       |      |       |        |        |      |      |      |       |      |       |        |        |      |      |      |        |      |      |        |        |      |      |      |        |      |      |      |      |      |      |      |        |      |      |        |        |      |      |      |       |      |      |      |      |      |      |      |
| Lab 15    | 1                                                                                                                                                                                                  | 9.66                                                                                                                                                                                                                                                                                                                                                                                                                                                                                                                                                                                                                                                                                                                                                                                                                                                                                                                                                                                                                                                                                                                                                                                                                                                                                                                                                                                                                                                                                                                                                                                                                                                                                                                                                                                                                                                                                                                                                                                                                                                            | 800.98    | 737.11                             | +ESI                      | AD1                | a         |          |                    |     |       |      |       |        |        |      |      |      |       |      |      |      |      |      |      |      |       |      |      |      |      |      |      |      |        |      |      |        |        |      |      |      |        |      |       |        |        |      |      |      |        |   |      |        |        |      |     |   |       |      |       |        |        |      |      |      |       |      |       |        |        |      |      |      |        |      |      |        |        |      |      |      |        |      |      |      |      |      |      |      |        |      |      |        |        |      |      |      |       |      |      |      |      |      |      |      |
| Lab 9     | 2                                                                                                                                                                                                  | 13.01                                                                                                                                                                                                                                                                                                                                                                                                                                                                                                                                                                                                                                                                                                                                                                                                                                                                                                                                                                                                                                                                                                                                                                                                                                                                                                                                                                                                                                                                                                                                                                                                                                                                                                                                                                                                                                                                                                                                                                                                                                                           | 717.68    | 737.11                             | +ESI                      | AD1                | a         |          |                    |     |       |      |       |        |        |      |      |      |       |      |      |      |      |      |      |      |       |      |      |      |      |      |      |      |        |      |      |        |        |      |      |      |        |      |       |        |        |      |      |      |        |   |      |        |        |      |     |   |       |      |       |        |        |      |      |      |       |      |       |        |        |      |      |      |        |      |      |        |        |      |      |      |        |      |      |      |      |      |      |      |        |      |      |        |        |      |      |      |       |      |      |      |      |      |      |      |
| Lab 2     | 1                                                                                                                                                                                                  | 35.49                                                                                                                                                                                                                                                                                                                                                                                                                                                                                                                                                                                                                                                                                                                                                                                                                                                                                                                                                                                                                                                                                                                                                                                                                                                                                                                                                                                                                                                                                                                                                                                                                                                                                                                                                                                                                                                                                                                                                                                                                                                           | 791.80    | 737.11                             | +ESI                      | AD1                | a         |          |                    |     |       |      |       |        |        |      |      |      |       |      |      |      |      |      |      |      |       |      |      |      |      |      |      |      |        |      |      |        |        |      |      |      |        |      |       |        |        |      |      |      |        |   |      |        |        |      |     |   |       |      |       |        |        |      |      |      |       |      |       |        |        |      |      |      |        |      |      |        |        |      |      |      |        |      |      |      |      |      |      |      |        |      |      |        |        |      |      |      |       |      |      |      |      |      |      |      |
| Lab 18    | N.D.                                                                                                                                                                                               | N.D.                                                                                                                                                                                                                                                                                                                                                                                                                                                                                                                                                                                                                                                                                                                                                                                                                                                                                                                                                                                                                                                                                                                                                                                                                                                                                                                                                                                                                                                                                                                                                                                                                                                                                                                                                                                                                                                                                                                                                                                                                                                            | N.D.      | N.D.                               | N.D.                      | N.D.               | N.D.      |          |                    |     |       |      |       |        |        |      |      |      |       |      |      |      |      |      |      |      |       |      |      |      |      |      |      |      |        |      |      |        |        |      |      |      |        |      |       |        |        |      |      |      |        |   |      |        |        |      |     |   |       |      |       |        |        |      |      |      |       |      |       |        |        |      |      |      |        |      |      |        |        |      |      |      |        |      |      |      |      |      |      |      |        |      |      |        |        |      |      |      |       |      |      |      |      |      |      |      |
| Lab 17    | N.D.                                                                                                                                                                                               | N.D.                                                                                                                                                                                                                                                                                                                                                                                                                                                                                                                                                                                                                                                                                                                                                                                                                                                                                                                                                                                                                                                                                                                                                                                                                                                                                                                                                                                                                                                                                                                                                                                                                                                                                                                                                                                                                                                                                                                                                                                                                                                            | N.D.      | N.D.                               | N.D.                      | N.D.               | N.D.      |          |                    |     |       |      |       |        |        |      |      |      |       |      |      |      |      |      |      |      |       |      |      |      |      |      |      |      |        |      |      |        |        |      |      |      |        |      |       |        |        |      |      |      |        |   |      |        |        |      |     |   |       |      |       |        |        |      |      |      |       |      |       |        |        |      |      |      |        |      |      |        |        |      |      |      |        |      |      |      |      |      |      |      |        |      |      |        |        |      |      |      |       |      |      |      |      |      |      |      |
| Lab 10    | N.D.                                                                                                                                                                                               | N.D.                                                                                                                                                                                                                                                                                                                                                                                                                                                                                                                                                                                                                                                                                                                                                                                                                                                                                                                                                                                                                                                                                                                                                                                                                                                                                                                                                                                                                                                                                                                                                                                                                                                                                                                                                                                                                                                                                                                                                                                                                                                            | N.D.      | N.D.                               | N.D.                      | N.D.               | N.D.      |          |                    |     |       |      |       |        |        |      |      |      |       |      |      |      |      |      |      |      |       |      |      |      |      |      |      |      |        |      |      |        |        |      |      |      |        |      |       |        |        |      |      |      |        |   |      |        |        |      |     |   |       |      |       |        |        |      |      |      |       |      |       |        |        |      |      |      |        |      |      |        |        |      |      |      |        |      |      |      |      |      |      |      |        |      |      |        |        |      |      |      |       |      |      |      |      |      |      |      |
| Lab 7     | N.D.                                                                                                                                                                                               | N.D.                                                                                                                                                                                                                                                                                                                                                                                                                                                                                                                                                                                                                                                                                                                                                                                                                                                                                                                                                                                                                                                                                                                                                                                                                                                                                                                                                                                                                                                                                                                                                                                                                                                                                                                                                                                                                                                                                                                                                                                                                                                            | N.D.      | N.D.                               | N.D.                      | N.D.               | N.D.      |          |                    |     |       |      |       |        |        |      |      |      |       |      |      |      |      |      |      |      |       |      |      |      |      |      |      |      |        |      |      |        |        |      |      |      |        |      |       |        |        |      |      |      |        |   |      |        |        |      |     |   |       |      |       |        |        |      |      |      |       |      |       |        |        |      |      |      |        |      |      |        |        |      |      |      |        |      |      |      |      |      |      |      |        |      |      |        |        |      |      |      |       |      |      |      |      |      |      |      |
| (9)       | <p style="text-align: center;"><b>Comparison of Exp. RTI values: Tris(2-chloroethyl) phosphate</b></p> <p style="text-align: center;">No groups have means significantly different from Lab 12</p> | <table border="1"> <thead> <tr> <th>Institute</th> <th>Level of identification confidence</th> <th>Exp. t<sub>R</sub> (min)</th> <th>Exp. RTI</th> <th>Pred. RTI</th> <th>ESI mode</th> <th>Application domain</th> <th>MCP</th> </tr> </thead> <tbody> <tr><td>Lab 6</td><td>N.D.</td><td>N.D.</td><td>N.D.</td><td>N.D.</td><td>N.D.</td><td>N.D.</td><td>N.D.</td></tr> <tr><td>Lab 5</td><td>N.D.</td><td>N.D.</td><td>N.D.</td><td>N.D.</td><td>N.D.</td><td>N.D.</td><td>N.D.</td></tr> <tr><td>Lab 4</td><td>N.D.</td><td>N.D.</td><td>N.D.</td><td>N.D.</td><td>N.D.</td><td>N.D.</td><td>N.D.</td></tr> <tr><td>Lab 12</td><td>1</td><td>4.96</td><td>496.12</td><td>530.74</td><td>+ESI</td><td>AD1</td><td>a</td></tr> <tr><td>Lab 13</td><td>2</td><td>14.89</td><td>555.72</td><td>530.74</td><td>+ESI</td><td>AD1</td><td>a</td></tr> <tr><td>Lab 15</td><td>1</td><td>5.94</td><td>488.72</td><td>530.74</td><td>+ESI</td><td>AD1</td><td>a</td></tr> <tr><td>Lab 9</td><td>N.D.</td><td>N.D.</td><td>N.D.</td><td>N.D.</td><td>N.D.</td><td>N.D.</td><td>N.D.</td></tr> <tr><td>Lab 2</td><td>N.D.</td><td>N.D.</td><td>N.D.</td><td>N.D.</td><td>N.D.</td><td>N.D.</td><td>N.D.</td></tr> <tr><td>Lab 18</td><td>1</td><td>9.71</td><td>425.15</td><td>530.74</td><td>+ESI</td><td>AD2</td><td>a</td></tr> <tr><td>Lab 17</td><td>N.D.</td><td>N.D.</td><td>N.D.</td><td>N.D.</td><td>N.D.</td><td>N.D.</td><td>N.D.</td></tr> <tr><td>Lab 10</td><td>2</td><td>7.79</td><td>474.69</td><td>530.74</td><td>+ESI</td><td>AD1</td><td>a</td></tr> <tr><td>Lab 7</td><td>N.D.</td><td>N.D.</td><td>N.D.</td><td>N.D.</td><td>N.D.</td><td>N.D.</td><td>N.D.</td></tr> </tbody> </table> <p>AD1: Exp. &amp; Pred. t<sub>R</sub> are accepted for this candidate (box1)<br/> AD2: Although there is error, exp. &amp; pred. t<sub>R</sub> are accepted for this candidate (box2)<br/> N.D.: Not detected.<br/> All institutes have acceptable exp. RTI values and the difference is <b>not significant at 99% CIs</b> of the calibration curve.</p> | Institute | Level of identification confidence | Exp. t <sub>R</sub> (min) | Exp. RTI           | Pred. RTI | ESI mode | Application domain | MCP | Lab 6 | N.D. | N.D.  | N.D.   | N.D.   | N.D. | N.D. | N.D. | Lab 5 | N.D. | N.D. | N.D. | N.D. | N.D. | N.D. | N.D. | Lab 4 | N.D. | N.D. | N.D. | N.D. | N.D. | N.D. | N.D. | Lab 12 | 1    | 4.96 | 496.12 | 530.74 | +ESI | AD1  | a    | Lab 13 | 2    | 14.89 | 555.72 | 530.74 | +ESI | AD1  | a    | Lab 15 | 1 | 5.94 | 488.72 | 530.74 | +ESI | AD1 | a | Lab 9 | N.D. | N.D.  | N.D.   | N.D.   | N.D. | N.D. | N.D. | Lab 2 | N.D. | N.D.  | N.D.   | N.D.   | N.D. | N.D. | N.D. | Lab 18 | 1    | 9.71 | 425.15 | 530.74 | +ESI | AD2  | a    | Lab 17 | N.D. | N.D. | N.D. | N.D. | N.D. | N.D. | N.D. | Lab 10 | 2    | 7.79 | 474.69 | 530.74 | +ESI | AD1  | a    | Lab 7 | N.D. | N.D. | N.D. | N.D. | N.D. | N.D. | N.D. |
| Institute | Level of identification confidence                                                                                                                                                                 | Exp. t <sub>R</sub> (min)                                                                                                                                                                                                                                                                                                                                                                                                                                                                                                                                                                                                                                                                                                                                                                                                                                                                                                                                                                                                                                                                                                                                                                                                                                                                                                                                                                                                                                                                                                                                                                                                                                                                                                                                                                                                                                                                                                                                                                                                                                       | Exp. RTI  | Pred. RTI                          | ESI mode                  | Application domain | MCP       |          |                    |     |       |      |       |        |        |      |      |      |       |      |      |      |      |      |      |      |       |      |      |      |      |      |      |      |        |      |      |        |        |      |      |      |        |      |       |        |        |      |      |      |        |   |      |        |        |      |     |   |       |      |       |        |        |      |      |      |       |      |       |        |        |      |      |      |        |      |      |        |        |      |      |      |        |      |      |      |      |      |      |      |        |      |      |        |        |      |      |      |       |      |      |      |      |      |      |      |
| Lab 6     | N.D.                                                                                                                                                                                               | N.D.                                                                                                                                                                                                                                                                                                                                                                                                                                                                                                                                                                                                                                                                                                                                                                                                                                                                                                                                                                                                                                                                                                                                                                                                                                                                                                                                                                                                                                                                                                                                                                                                                                                                                                                                                                                                                                                                                                                                                                                                                                                            | N.D.      | N.D.                               | N.D.                      | N.D.               | N.D.      |          |                    |     |       |      |       |        |        |      |      |      |       |      |      |      |      |      |      |      |       |      |      |      |      |      |      |      |        |      |      |        |        |      |      |      |        |      |       |        |        |      |      |      |        |   |      |        |        |      |     |   |       |      |       |        |        |      |      |      |       |      |       |        |        |      |      |      |        |      |      |        |        |      |      |      |        |      |      |      |      |      |      |      |        |      |      |        |        |      |      |      |       |      |      |      |      |      |      |      |
| Lab 5     | N.D.                                                                                                                                                                                               | N.D.                                                                                                                                                                                                                                                                                                                                                                                                                                                                                                                                                                                                                                                                                                                                                                                                                                                                                                                                                                                                                                                                                                                                                                                                                                                                                                                                                                                                                                                                                                                                                                                                                                                                                                                                                                                                                                                                                                                                                                                                                                                            | N.D.      | N.D.                               | N.D.                      | N.D.               | N.D.      |          |                    |     |       |      |       |        |        |      |      |      |       |      |      |      |      |      |      |      |       |      |      |      |      |      |      |      |        |      |      |        |        |      |      |      |        |      |       |        |        |      |      |      |        |   |      |        |        |      |     |   |       |      |       |        |        |      |      |      |       |      |       |        |        |      |      |      |        |      |      |        |        |      |      |      |        |      |      |      |      |      |      |      |        |      |      |        |        |      |      |      |       |      |      |      |      |      |      |      |
| Lab 4     | N.D.                                                                                                                                                                                               | N.D.                                                                                                                                                                                                                                                                                                                                                                                                                                                                                                                                                                                                                                                                                                                                                                                                                                                                                                                                                                                                                                                                                                                                                                                                                                                                                                                                                                                                                                                                                                                                                                                                                                                                                                                                                                                                                                                                                                                                                                                                                                                            | N.D.      | N.D.                               | N.D.                      | N.D.               | N.D.      |          |                    |     |       |      |       |        |        |      |      |      |       |      |      |      |      |      |      |      |       |      |      |      |      |      |      |      |        |      |      |        |        |      |      |      |        |      |       |        |        |      |      |      |        |   |      |        |        |      |     |   |       |      |       |        |        |      |      |      |       |      |       |        |        |      |      |      |        |      |      |        |        |      |      |      |        |      |      |      |      |      |      |      |        |      |      |        |        |      |      |      |       |      |      |      |      |      |      |      |
| Lab 12    | 1                                                                                                                                                                                                  | 4.96                                                                                                                                                                                                                                                                                                                                                                                                                                                                                                                                                                                                                                                                                                                                                                                                                                                                                                                                                                                                                                                                                                                                                                                                                                                                                                                                                                                                                                                                                                                                                                                                                                                                                                                                                                                                                                                                                                                                                                                                                                                            | 496.12    | 530.74                             | +ESI                      | AD1                | a         |          |                    |     |       |      |       |        |        |      |      |      |       |      |      |      |      |      |      |      |       |      |      |      |      |      |      |      |        |      |      |        |        |      |      |      |        |      |       |        |        |      |      |      |        |   |      |        |        |      |     |   |       |      |       |        |        |      |      |      |       |      |       |        |        |      |      |      |        |      |      |        |        |      |      |      |        |      |      |      |      |      |      |      |        |      |      |        |        |      |      |      |       |      |      |      |      |      |      |      |
| Lab 13    | 2                                                                                                                                                                                                  | 14.89                                                                                                                                                                                                                                                                                                                                                                                                                                                                                                                                                                                                                                                                                                                                                                                                                                                                                                                                                                                                                                                                                                                                                                                                                                                                                                                                                                                                                                                                                                                                                                                                                                                                                                                                                                                                                                                                                                                                                                                                                                                           | 555.72    | 530.74                             | +ESI                      | AD1                | a         |          |                    |     |       |      |       |        |        |      |      |      |       |      |      |      |      |      |      |      |       |      |      |      |      |      |      |      |        |      |      |        |        |      |      |      |        |      |       |        |        |      |      |      |        |   |      |        |        |      |     |   |       |      |       |        |        |      |      |      |       |      |       |        |        |      |      |      |        |      |      |        |        |      |      |      |        |      |      |      |      |      |      |      |        |      |      |        |        |      |      |      |       |      |      |      |      |      |      |      |
| Lab 15    | 1                                                                                                                                                                                                  | 5.94                                                                                                                                                                                                                                                                                                                                                                                                                                                                                                                                                                                                                                                                                                                                                                                                                                                                                                                                                                                                                                                                                                                                                                                                                                                                                                                                                                                                                                                                                                                                                                                                                                                                                                                                                                                                                                                                                                                                                                                                                                                            | 488.72    | 530.74                             | +ESI                      | AD1                | a         |          |                    |     |       |      |       |        |        |      |      |      |       |      |      |      |      |      |      |      |       |      |      |      |      |      |      |      |        |      |      |        |        |      |      |      |        |      |       |        |        |      |      |      |        |   |      |        |        |      |     |   |       |      |       |        |        |      |      |      |       |      |       |        |        |      |      |      |        |      |      |        |        |      |      |      |        |      |      |      |      |      |      |      |        |      |      |        |        |      |      |      |       |      |      |      |      |      |      |      |
| Lab 9     | N.D.                                                                                                                                                                                               | N.D.                                                                                                                                                                                                                                                                                                                                                                                                                                                                                                                                                                                                                                                                                                                                                                                                                                                                                                                                                                                                                                                                                                                                                                                                                                                                                                                                                                                                                                                                                                                                                                                                                                                                                                                                                                                                                                                                                                                                                                                                                                                            | N.D.      | N.D.                               | N.D.                      | N.D.               | N.D.      |          |                    |     |       |      |       |        |        |      |      |      |       |      |      |      |      |      |      |      |       |      |      |      |      |      |      |      |        |      |      |        |        |      |      |      |        |      |       |        |        |      |      |      |        |   |      |        |        |      |     |   |       |      |       |        |        |      |      |      |       |      |       |        |        |      |      |      |        |      |      |        |        |      |      |      |        |      |      |      |      |      |      |      |        |      |      |        |        |      |      |      |       |      |      |      |      |      |      |      |
| Lab 2     | N.D.                                                                                                                                                                                               | N.D.                                                                                                                                                                                                                                                                                                                                                                                                                                                                                                                                                                                                                                                                                                                                                                                                                                                                                                                                                                                                                                                                                                                                                                                                                                                                                                                                                                                                                                                                                                                                                                                                                                                                                                                                                                                                                                                                                                                                                                                                                                                            | N.D.      | N.D.                               | N.D.                      | N.D.               | N.D.      |          |                    |     |       |      |       |        |        |      |      |      |       |      |      |      |      |      |      |      |       |      |      |      |      |      |      |      |        |      |      |        |        |      |      |      |        |      |       |        |        |      |      |      |        |   |      |        |        |      |     |   |       |      |       |        |        |      |      |      |       |      |       |        |        |      |      |      |        |      |      |        |        |      |      |      |        |      |      |      |      |      |      |      |        |      |      |        |        |      |      |      |       |      |      |      |      |      |      |      |
| Lab 18    | 1                                                                                                                                                                                                  | 9.71                                                                                                                                                                                                                                                                                                                                                                                                                                                                                                                                                                                                                                                                                                                                                                                                                                                                                                                                                                                                                                                                                                                                                                                                                                                                                                                                                                                                                                                                                                                                                                                                                                                                                                                                                                                                                                                                                                                                                                                                                                                            | 425.15    | 530.74                             | +ESI                      | AD2                | a         |          |                    |     |       |      |       |        |        |      |      |      |       |      |      |      |      |      |      |      |       |      |      |      |      |      |      |      |        |      |      |        |        |      |      |      |        |      |       |        |        |      |      |      |        |   |      |        |        |      |     |   |       |      |       |        |        |      |      |      |       |      |       |        |        |      |      |      |        |      |      |        |        |      |      |      |        |      |      |      |      |      |      |      |        |      |      |        |        |      |      |      |       |      |      |      |      |      |      |      |
| Lab 17    | N.D.                                                                                                                                                                                               | N.D.                                                                                                                                                                                                                                                                                                                                                                                                                                                                                                                                                                                                                                                                                                                                                                                                                                                                                                                                                                                                                                                                                                                                                                                                                                                                                                                                                                                                                                                                                                                                                                                                                                                                                                                                                                                                                                                                                                                                                                                                                                                            | N.D.      | N.D.                               | N.D.                      | N.D.               | N.D.      |          |                    |     |       |      |       |        |        |      |      |      |       |      |      |      |      |      |      |      |       |      |      |      |      |      |      |      |        |      |      |        |        |      |      |      |        |      |       |        |        |      |      |      |        |   |      |        |        |      |     |   |       |      |       |        |        |      |      |      |       |      |       |        |        |      |      |      |        |      |      |        |        |      |      |      |        |      |      |      |      |      |      |      |        |      |      |        |        |      |      |      |       |      |      |      |      |      |      |      |
| Lab 10    | 2                                                                                                                                                                                                  | 7.79                                                                                                                                                                                                                                                                                                                                                                                                                                                                                                                                                                                                                                                                                                                                                                                                                                                                                                                                                                                                                                                                                                                                                                                                                                                                                                                                                                                                                                                                                                                                                                                                                                                                                                                                                                                                                                                                                                                                                                                                                                                            | 474.69    | 530.74                             | +ESI                      | AD1                | a         |          |                    |     |       |      |       |        |        |      |      |      |       |      |      |      |      |      |      |      |       |      |      |      |      |      |      |      |        |      |      |        |        |      |      |      |        |      |       |        |        |      |      |      |        |   |      |        |        |      |     |   |       |      |       |        |        |      |      |      |       |      |       |        |        |      |      |      |        |      |      |        |        |      |      |      |        |      |      |      |      |      |      |      |        |      |      |        |        |      |      |      |       |      |      |      |      |      |      |      |
| Lab 7     | N.D.                                                                                                                                                                                               | N.D.                                                                                                                                                                                                                                                                                                                                                                                                                                                                                                                                                                                                                                                                                                                                                                                                                                                                                                                                                                                                                                                                                                                                                                                                                                                                                                                                                                                                                                                                                                                                                                                                                                                                                                                                                                                                                                                                                                                                                                                                                                                            | N.D.      | N.D.                               | N.D.                      | N.D.               | N.D.      |          |                    |     |       |      |       |        |        |      |      |      |       |      |      |      |      |      |      |      |       |      |      |      |      |      |      |      |        |      |      |        |        |      |      |      |        |      |       |        |        |      |      |      |        |   |      |        |        |      |     |   |       |      |       |        |        |      |      |      |       |      |       |        |        |      |      |      |        |      |      |        |        |      |      |      |        |      |      |      |      |      |      |      |        |      |      |        |        |      |      |      |       |      |      |      |      |      |      |      |

| No.       | multiple comparison procedure plot                                                                                                                                                       | RTI details                                                                                                                                                                                                                                                                                                                                                                                                                                                                                                                                                                                                                                                                                                                                                                                                                                                                                                                                                                                                                                                                                                                                                                                                                                                                                                                                                                                                                                                                                                                                                                                                                                                                                                                                                                                                                                                                                                                                                                                                                                                                                                                                                                                                                                                  |           |                                    |                           |                    |           |          |                    |     |       |    |      |        |        |      |     |   |       |      |      |        |        |      |      |      |       |   |       |        |        |      |     |   |        |      |      |        |        |      |      |      |        |      |      |      |      |      |      |      |        |      |      |        |        |      |      |      |       |      |       |        |        |      |      |      |       |      |       |        |        |      |      |      |        |      |      |      |      |      |      |      |        |      |      |        |        |      |      |      |        |      |      |      |      |      |      |      |       |      |       |        |        |      |      |      |
|-----------|------------------------------------------------------------------------------------------------------------------------------------------------------------------------------------------|--------------------------------------------------------------------------------------------------------------------------------------------------------------------------------------------------------------------------------------------------------------------------------------------------------------------------------------------------------------------------------------------------------------------------------------------------------------------------------------------------------------------------------------------------------------------------------------------------------------------------------------------------------------------------------------------------------------------------------------------------------------------------------------------------------------------------------------------------------------------------------------------------------------------------------------------------------------------------------------------------------------------------------------------------------------------------------------------------------------------------------------------------------------------------------------------------------------------------------------------------------------------------------------------------------------------------------------------------------------------------------------------------------------------------------------------------------------------------------------------------------------------------------------------------------------------------------------------------------------------------------------------------------------------------------------------------------------------------------------------------------------------------------------------------------------------------------------------------------------------------------------------------------------------------------------------------------------------------------------------------------------------------------------------------------------------------------------------------------------------------------------------------------------------------------------------------------------------------------------------------------------|-----------|------------------------------------|---------------------------|--------------------|-----------|----------|--------------------|-----|-------|----|------|--------|--------|------|-----|---|-------|------|------|--------|--------|------|------|------|-------|---|-------|--------|--------|------|-----|---|--------|------|------|--------|--------|------|------|------|--------|------|------|------|------|------|------|------|--------|------|------|--------|--------|------|------|------|-------|------|-------|--------|--------|------|------|------|-------|------|-------|--------|--------|------|------|------|--------|------|------|------|------|------|------|------|--------|------|------|--------|--------|------|------|------|--------|------|------|------|------|------|------|------|-------|------|-------|--------|--------|------|------|------|
| (10)      | <p style="text-align: center;"><b>Comparison of Exp. RTI values: DEET</b></p> <p style="text-align: center;">No groups have means significantly different from Lab 06</p>                | <table border="1"> <thead> <tr> <th>Institute</th> <th>Level of identification confidence</th> <th>Exp. t<sub>R</sub> (min)</th> <th>Exp. RTI</th> <th>Pred. RTI</th> <th>ESI mode</th> <th>Application domain</th> <th>MCP</th> </tr> </thead> <tbody> <tr><td>Lab 6</td><td>1</td><td>8.16</td><td>523.42</td><td>516.90</td><td>+ESI</td><td>AD1</td><td>a</td></tr> <tr><td>Lab 5</td><td>N.D.</td><td>N.D.</td><td>N.D.</td><td>N.D.</td><td>N.D.</td><td>N.D.</td><td>N.D.</td></tr> <tr><td>Lab 4</td><td>1</td><td>10.34</td><td>557.83</td><td>516.90</td><td>+ESI</td><td>AD1</td><td>a</td></tr> <tr><td>Lab 12</td><td>2a</td><td>5.29</td><td>532.25</td><td>516.90</td><td>+ESI</td><td>AD1</td><td>a</td></tr> <tr><td>Lab 13</td><td>N.D.</td><td>N.D.</td><td>N.D.</td><td>N.D.</td><td>N.D.</td><td>N.D.</td><td>N.D.</td></tr> <tr><td>Lab 15</td><td>N.D.</td><td>N.D.</td><td>N.D.</td><td>N.D.</td><td>N.D.</td><td>N.D.</td><td>N.D.</td></tr> <tr><td>Lab 9</td><td>2</td><td>11.00</td><td>583.57</td><td>516.90</td><td>+ESI</td><td>AD1</td><td>a</td></tr> <tr><td>Lab 2</td><td>2</td><td>20.87</td><td>495.41</td><td>516.90</td><td>+ESI</td><td>AD1</td><td>a</td></tr> <tr><td>Lab 18</td><td>N.D.</td><td>N.D.</td><td>N.D.</td><td>N.D.</td><td>N.D.</td><td>N.D.</td><td>N.D.</td></tr> <tr><td>Lab 17</td><td>1</td><td>9.63</td><td>534.92</td><td>516.90</td><td>+ESI</td><td>AD1</td><td>a</td></tr> <tr><td>Lab 10</td><td>N.D.</td><td>N.D.</td><td>N.D.</td><td>N.D.</td><td>N.D.</td><td>N.D.</td><td>N.D.</td></tr> <tr><td>Lab 7</td><td>2</td><td>14.58</td><td>576.86</td><td>516.90</td><td>+ESI</td><td>AD1</td><td>a</td></tr> </tbody> </table> <p>AD1: Exp. &amp; Pred. t<sub>R</sub> are accepted for this candidate (box1)<br/> N.D.: Not detected.<br/> All institutes have acceptable exp. RTI values and the difference is <b>not significant at 99% CIs</b> of the calibration curve.</p>                                                                                                                                                                                                                                                                                                         | Institute | Level of identification confidence | Exp. t <sub>R</sub> (min) | Exp. RTI           | Pred. RTI | ESI mode | Application domain | MCP | Lab 6 | 1  | 8.16 | 523.42 | 516.90 | +ESI | AD1 | a | Lab 5 | N.D. | N.D. | N.D.   | N.D.   | N.D. | N.D. | N.D. | Lab 4 | 1 | 10.34 | 557.83 | 516.90 | +ESI | AD1 | a | Lab 12 | 2a   | 5.29 | 532.25 | 516.90 | +ESI | AD1  | a    | Lab 13 | N.D. | N.D. | N.D. | N.D. | N.D. | N.D. | N.D. | Lab 15 | N.D. | N.D. | N.D.   | N.D.   | N.D. | N.D. | N.D. | Lab 9 | 2    | 11.00 | 583.57 | 516.90 | +ESI | AD1  | a    | Lab 2 | 2    | 20.87 | 495.41 | 516.90 | +ESI | AD1  | a    | Lab 18 | N.D. | N.D. | N.D. | N.D. | N.D. | N.D. | N.D. | Lab 17 | 1    | 9.63 | 534.92 | 516.90 | +ESI | AD1  | a    | Lab 10 | N.D. | N.D. | N.D. | N.D. | N.D. | N.D. | N.D. | Lab 7 | 2    | 14.58 | 576.86 | 516.90 | +ESI | AD1  | a    |
| Institute | Level of identification confidence                                                                                                                                                       | Exp. t <sub>R</sub> (min)                                                                                                                                                                                                                                                                                                                                                                                                                                                                                                                                                                                                                                                                                                                                                                                                                                                                                                                                                                                                                                                                                                                                                                                                                                                                                                                                                                                                                                                                                                                                                                                                                                                                                                                                                                                                                                                                                                                                                                                                                                                                                                                                                                                                                                    | Exp. RTI  | Pred. RTI                          | ESI mode                  | Application domain | MCP       |          |                    |     |       |    |      |        |        |      |     |   |       |      |      |        |        |      |      |      |       |   |       |        |        |      |     |   |        |      |      |        |        |      |      |      |        |      |      |      |      |      |      |      |        |      |      |        |        |      |      |      |       |      |       |        |        |      |      |      |       |      |       |        |        |      |      |      |        |      |      |      |      |      |      |      |        |      |      |        |        |      |      |      |        |      |      |      |      |      |      |      |       |      |       |        |        |      |      |      |
| Lab 6     | 1                                                                                                                                                                                        | 8.16                                                                                                                                                                                                                                                                                                                                                                                                                                                                                                                                                                                                                                                                                                                                                                                                                                                                                                                                                                                                                                                                                                                                                                                                                                                                                                                                                                                                                                                                                                                                                                                                                                                                                                                                                                                                                                                                                                                                                                                                                                                                                                                                                                                                                                                         | 523.42    | 516.90                             | +ESI                      | AD1                | a         |          |                    |     |       |    |      |        |        |      |     |   |       |      |      |        |        |      |      |      |       |   |       |        |        |      |     |   |        |      |      |        |        |      |      |      |        |      |      |      |      |      |      |      |        |      |      |        |        |      |      |      |       |      |       |        |        |      |      |      |       |      |       |        |        |      |      |      |        |      |      |      |      |      |      |      |        |      |      |        |        |      |      |      |        |      |      |      |      |      |      |      |       |      |       |        |        |      |      |      |
| Lab 5     | N.D.                                                                                                                                                                                     | N.D.                                                                                                                                                                                                                                                                                                                                                                                                                                                                                                                                                                                                                                                                                                                                                                                                                                                                                                                                                                                                                                                                                                                                                                                                                                                                                                                                                                                                                                                                                                                                                                                                                                                                                                                                                                                                                                                                                                                                                                                                                                                                                                                                                                                                                                                         | N.D.      | N.D.                               | N.D.                      | N.D.               | N.D.      |          |                    |     |       |    |      |        |        |      |     |   |       |      |      |        |        |      |      |      |       |   |       |        |        |      |     |   |        |      |      |        |        |      |      |      |        |      |      |      |      |      |      |      |        |      |      |        |        |      |      |      |       |      |       |        |        |      |      |      |       |      |       |        |        |      |      |      |        |      |      |      |      |      |      |      |        |      |      |        |        |      |      |      |        |      |      |      |      |      |      |      |       |      |       |        |        |      |      |      |
| Lab 4     | 1                                                                                                                                                                                        | 10.34                                                                                                                                                                                                                                                                                                                                                                                                                                                                                                                                                                                                                                                                                                                                                                                                                                                                                                                                                                                                                                                                                                                                                                                                                                                                                                                                                                                                                                                                                                                                                                                                                                                                                                                                                                                                                                                                                                                                                                                                                                                                                                                                                                                                                                                        | 557.83    | 516.90                             | +ESI                      | AD1                | a         |          |                    |     |       |    |      |        |        |      |     |   |       |      |      |        |        |      |      |      |       |   |       |        |        |      |     |   |        |      |      |        |        |      |      |      |        |      |      |      |      |      |      |      |        |      |      |        |        |      |      |      |       |      |       |        |        |      |      |      |       |      |       |        |        |      |      |      |        |      |      |      |      |      |      |      |        |      |      |        |        |      |      |      |        |      |      |      |      |      |      |      |       |      |       |        |        |      |      |      |
| Lab 12    | 2a                                                                                                                                                                                       | 5.29                                                                                                                                                                                                                                                                                                                                                                                                                                                                                                                                                                                                                                                                                                                                                                                                                                                                                                                                                                                                                                                                                                                                                                                                                                                                                                                                                                                                                                                                                                                                                                                                                                                                                                                                                                                                                                                                                                                                                                                                                                                                                                                                                                                                                                                         | 532.25    | 516.90                             | +ESI                      | AD1                | a         |          |                    |     |       |    |      |        |        |      |     |   |       |      |      |        |        |      |      |      |       |   |       |        |        |      |     |   |        |      |      |        |        |      |      |      |        |      |      |      |      |      |      |      |        |      |      |        |        |      |      |      |       |      |       |        |        |      |      |      |       |      |       |        |        |      |      |      |        |      |      |      |      |      |      |      |        |      |      |        |        |      |      |      |        |      |      |      |      |      |      |      |       |      |       |        |        |      |      |      |
| Lab 13    | N.D.                                                                                                                                                                                     | N.D.                                                                                                                                                                                                                                                                                                                                                                                                                                                                                                                                                                                                                                                                                                                                                                                                                                                                                                                                                                                                                                                                                                                                                                                                                                                                                                                                                                                                                                                                                                                                                                                                                                                                                                                                                                                                                                                                                                                                                                                                                                                                                                                                                                                                                                                         | N.D.      | N.D.                               | N.D.                      | N.D.               | N.D.      |          |                    |     |       |    |      |        |        |      |     |   |       |      |      |        |        |      |      |      |       |   |       |        |        |      |     |   |        |      |      |        |        |      |      |      |        |      |      |      |      |      |      |      |        |      |      |        |        |      |      |      |       |      |       |        |        |      |      |      |       |      |       |        |        |      |      |      |        |      |      |      |      |      |      |      |        |      |      |        |        |      |      |      |        |      |      |      |      |      |      |      |       |      |       |        |        |      |      |      |
| Lab 15    | N.D.                                                                                                                                                                                     | N.D.                                                                                                                                                                                                                                                                                                                                                                                                                                                                                                                                                                                                                                                                                                                                                                                                                                                                                                                                                                                                                                                                                                                                                                                                                                                                                                                                                                                                                                                                                                                                                                                                                                                                                                                                                                                                                                                                                                                                                                                                                                                                                                                                                                                                                                                         | N.D.      | N.D.                               | N.D.                      | N.D.               | N.D.      |          |                    |     |       |    |      |        |        |      |     |   |       |      |      |        |        |      |      |      |       |   |       |        |        |      |     |   |        |      |      |        |        |      |      |      |        |      |      |      |      |      |      |      |        |      |      |        |        |      |      |      |       |      |       |        |        |      |      |      |       |      |       |        |        |      |      |      |        |      |      |      |      |      |      |      |        |      |      |        |        |      |      |      |        |      |      |      |      |      |      |      |       |      |       |        |        |      |      |      |
| Lab 9     | 2                                                                                                                                                                                        | 11.00                                                                                                                                                                                                                                                                                                                                                                                                                                                                                                                                                                                                                                                                                                                                                                                                                                                                                                                                                                                                                                                                                                                                                                                                                                                                                                                                                                                                                                                                                                                                                                                                                                                                                                                                                                                                                                                                                                                                                                                                                                                                                                                                                                                                                                                        | 583.57    | 516.90                             | +ESI                      | AD1                | a         |          |                    |     |       |    |      |        |        |      |     |   |       |      |      |        |        |      |      |      |       |   |       |        |        |      |     |   |        |      |      |        |        |      |      |      |        |      |      |      |      |      |      |      |        |      |      |        |        |      |      |      |       |      |       |        |        |      |      |      |       |      |       |        |        |      |      |      |        |      |      |      |      |      |      |      |        |      |      |        |        |      |      |      |        |      |      |      |      |      |      |      |       |      |       |        |        |      |      |      |
| Lab 2     | 2                                                                                                                                                                                        | 20.87                                                                                                                                                                                                                                                                                                                                                                                                                                                                                                                                                                                                                                                                                                                                                                                                                                                                                                                                                                                                                                                                                                                                                                                                                                                                                                                                                                                                                                                                                                                                                                                                                                                                                                                                                                                                                                                                                                                                                                                                                                                                                                                                                                                                                                                        | 495.41    | 516.90                             | +ESI                      | AD1                | a         |          |                    |     |       |    |      |        |        |      |     |   |       |      |      |        |        |      |      |      |       |   |       |        |        |      |     |   |        |      |      |        |        |      |      |      |        |      |      |      |      |      |      |      |        |      |      |        |        |      |      |      |       |      |       |        |        |      |      |      |       |      |       |        |        |      |      |      |        |      |      |      |      |      |      |      |        |      |      |        |        |      |      |      |        |      |      |      |      |      |      |      |       |      |       |        |        |      |      |      |
| Lab 18    | N.D.                                                                                                                                                                                     | N.D.                                                                                                                                                                                                                                                                                                                                                                                                                                                                                                                                                                                                                                                                                                                                                                                                                                                                                                                                                                                                                                                                                                                                                                                                                                                                                                                                                                                                                                                                                                                                                                                                                                                                                                                                                                                                                                                                                                                                                                                                                                                                                                                                                                                                                                                         | N.D.      | N.D.                               | N.D.                      | N.D.               | N.D.      |          |                    |     |       |    |      |        |        |      |     |   |       |      |      |        |        |      |      |      |       |   |       |        |        |      |     |   |        |      |      |        |        |      |      |      |        |      |      |      |      |      |      |      |        |      |      |        |        |      |      |      |       |      |       |        |        |      |      |      |       |      |       |        |        |      |      |      |        |      |      |      |      |      |      |      |        |      |      |        |        |      |      |      |        |      |      |      |      |      |      |      |       |      |       |        |        |      |      |      |
| Lab 17    | 1                                                                                                                                                                                        | 9.63                                                                                                                                                                                                                                                                                                                                                                                                                                                                                                                                                                                                                                                                                                                                                                                                                                                                                                                                                                                                                                                                                                                                                                                                                                                                                                                                                                                                                                                                                                                                                                                                                                                                                                                                                                                                                                                                                                                                                                                                                                                                                                                                                                                                                                                         | 534.92    | 516.90                             | +ESI                      | AD1                | a         |          |                    |     |       |    |      |        |        |      |     |   |       |      |      |        |        |      |      |      |       |   |       |        |        |      |     |   |        |      |      |        |        |      |      |      |        |      |      |      |      |      |      |      |        |      |      |        |        |      |      |      |       |      |       |        |        |      |      |      |       |      |       |        |        |      |      |      |        |      |      |      |      |      |      |      |        |      |      |        |        |      |      |      |        |      |      |      |      |      |      |      |       |      |       |        |        |      |      |      |
| Lab 10    | N.D.                                                                                                                                                                                     | N.D.                                                                                                                                                                                                                                                                                                                                                                                                                                                                                                                                                                                                                                                                                                                                                                                                                                                                                                                                                                                                                                                                                                                                                                                                                                                                                                                                                                                                                                                                                                                                                                                                                                                                                                                                                                                                                                                                                                                                                                                                                                                                                                                                                                                                                                                         | N.D.      | N.D.                               | N.D.                      | N.D.               | N.D.      |          |                    |     |       |    |      |        |        |      |     |   |       |      |      |        |        |      |      |      |       |   |       |        |        |      |     |   |        |      |      |        |        |      |      |      |        |      |      |      |      |      |      |      |        |      |      |        |        |      |      |      |       |      |       |        |        |      |      |      |       |      |       |        |        |      |      |      |        |      |      |      |      |      |      |      |        |      |      |        |        |      |      |      |        |      |      |      |      |      |      |      |       |      |       |        |        |      |      |      |
| Lab 7     | 2                                                                                                                                                                                        | 14.58                                                                                                                                                                                                                                                                                                                                                                                                                                                                                                                                                                                                                                                                                                                                                                                                                                                                                                                                                                                                                                                                                                                                                                                                                                                                                                                                                                                                                                                                                                                                                                                                                                                                                                                                                                                                                                                                                                                                                                                                                                                                                                                                                                                                                                                        | 576.86    | 516.90                             | +ESI                      | AD1                | a         |          |                    |     |       |    |      |        |        |      |     |   |       |      |      |        |        |      |      |      |       |   |       |        |        |      |     |   |        |      |      |        |        |      |      |      |        |      |      |      |      |      |      |      |        |      |      |        |        |      |      |      |       |      |       |        |        |      |      |      |       |      |       |        |        |      |      |      |        |      |      |      |      |      |      |      |        |      |      |        |        |      |      |      |        |      |      |      |      |      |      |      |       |      |       |        |        |      |      |      |
| (11)      | <p style="text-align: center;"><b>Comparison of Exp. RTI values: HeptaethyleneGlycol</b></p> <p style="text-align: center;">No groups have means significantly different from Lab 06</p> | <table border="1"> <thead> <tr> <th>Institute</th> <th>Level of identification confidence</th> <th>Exp. t<sub>R</sub> (min)</th> <th>Exp. RTI</th> <th>Pred. RTI</th> <th>ESI mode</th> <th>Application domain</th> <th>MCP</th> </tr> </thead> <tbody> <tr><td>Lab 6</td><td>2a</td><td>4.06</td><td>210.28</td><td>526.55</td><td>+ESI</td><td>AD4</td><td>a</td></tr> <tr><td>Lab 5</td><td>2a</td><td>7.25</td><td>275.74</td><td>526.55</td><td>+ESI</td><td>AD3</td><td>a</td></tr> <tr><td>Lab 4</td><td>3</td><td>5.90</td><td>281.18</td><td>526.55</td><td>+ESI</td><td>AD3</td><td>a</td></tr> <tr><td>Lab 12</td><td>N.D.</td><td>N.D.</td><td>N.D.</td><td>N.D.</td><td>N.D.</td><td>N.D.</td><td>N.D.</td></tr> <tr><td>Lab 13</td><td>N.D.</td><td>N.D.</td><td>N.D.</td><td>N.D.</td><td>N.D.</td><td>N.D.</td><td>N.D.</td></tr> <tr><td>Lab 15</td><td>3</td><td>3.09</td><td>249.49</td><td>526.55</td><td>+ESI</td><td>AD3</td><td>a</td></tr> <tr><td>Lab 9</td><td>N.D.</td><td>N.D.</td><td>N.D.</td><td>N.D.</td><td>N.D.</td><td>N.D.</td><td>N.D.</td></tr> <tr><td>Lab 2</td><td>N.D.</td><td>N.D.</td><td>N.D.</td><td>N.D.</td><td>N.D.</td><td>N.D.</td><td>N.D.</td></tr> <tr><td>Lab 18</td><td>N.D.</td><td>N.D.</td><td>N.D.</td><td>N.D.</td><td>N.D.</td><td>N.D.</td><td>N.D.</td></tr> <tr><td>Lab 17</td><td>N.D.</td><td>N.D.</td><td>N.D.</td><td>N.D.</td><td>N.D.</td><td>N.D.</td><td>N.D.</td></tr> <tr><td>Lab 10</td><td>N.D.</td><td>N.D.</td><td>N.D.</td><td>N.D.</td><td>N.D.</td><td>N.D.</td><td>N.D.</td></tr> <tr><td>Lab 7</td><td>N.D.</td><td>N.D.</td><td>N.D.</td><td>N.D.</td><td>N.D.</td><td>N.D.</td><td>N.D.</td></tr> </tbody> </table> <p>AD3: Pred./Exp. t<sub>R</sub> are not reliable (high SR; use other verification tools (box3))<br/> AD4: Pred./Exp. t<sub>R</sub> are not reliable (Outside the applicability domain and high SR; use other verification tools (box4))<br/> N.D.: Not detected.<br/> Note: This compound is outside of AD of models, but the exp. RTI is comparable. All institutes have acceptable exp. RTI values and the difference is <b>not significant at 99% CIs</b> of the calibration curve.<br/> <b>Promote “Lab 15” &amp; “Lab 4” to level 2!</b></p> | Institute | Level of identification confidence | Exp. t <sub>R</sub> (min) | Exp. RTI           | Pred. RTI | ESI mode | Application domain | MCP | Lab 6 | 2a | 4.06 | 210.28 | 526.55 | +ESI | AD4 | a | Lab 5 | 2a   | 7.25 | 275.74 | 526.55 | +ESI | AD3  | a    | Lab 4 | 3 | 5.90  | 281.18 | 526.55 | +ESI | AD3 | a | Lab 12 | N.D. | N.D. | N.D.   | N.D.   | N.D. | N.D. | N.D. | Lab 13 | N.D. | N.D. | N.D. | N.D. | N.D. | N.D. | N.D. | Lab 15 | 3    | 3.09 | 249.49 | 526.55 | +ESI | AD3  | a    | Lab 9 | N.D. | N.D.  | N.D.   | N.D.   | N.D. | N.D. | N.D. | Lab 2 | N.D. | N.D.  | N.D.   | N.D.   | N.D. | N.D. | N.D. | Lab 18 | N.D. | N.D. | N.D. | N.D. | N.D. | N.D. | N.D. | Lab 17 | N.D. | N.D. | N.D.   | N.D.   | N.D. | N.D. | N.D. | Lab 10 | N.D. | N.D. | N.D. | N.D. | N.D. | N.D. | N.D. | Lab 7 | N.D. | N.D.  | N.D.   | N.D.   | N.D. | N.D. | N.D. |
| Institute | Level of identification confidence                                                                                                                                                       | Exp. t <sub>R</sub> (min)                                                                                                                                                                                                                                                                                                                                                                                                                                                                                                                                                                                                                                                                                                                                                                                                                                                                                                                                                                                                                                                                                                                                                                                                                                                                                                                                                                                                                                                                                                                                                                                                                                                                                                                                                                                                                                                                                                                                                                                                                                                                                                                                                                                                                                    | Exp. RTI  | Pred. RTI                          | ESI mode                  | Application domain | MCP       |          |                    |     |       |    |      |        |        |      |     |   |       |      |      |        |        |      |      |      |       |   |       |        |        |      |     |   |        |      |      |        |        |      |      |      |        |      |      |      |      |      |      |      |        |      |      |        |        |      |      |      |       |      |       |        |        |      |      |      |       |      |       |        |        |      |      |      |        |      |      |      |      |      |      |      |        |      |      |        |        |      |      |      |        |      |      |      |      |      |      |      |       |      |       |        |        |      |      |      |
| Lab 6     | 2a                                                                                                                                                                                       | 4.06                                                                                                                                                                                                                                                                                                                                                                                                                                                                                                                                                                                                                                                                                                                                                                                                                                                                                                                                                                                                                                                                                                                                                                                                                                                                                                                                                                                                                                                                                                                                                                                                                                                                                                                                                                                                                                                                                                                                                                                                                                                                                                                                                                                                                                                         | 210.28    | 526.55                             | +ESI                      | AD4                | a         |          |                    |     |       |    |      |        |        |      |     |   |       |      |      |        |        |      |      |      |       |   |       |        |        |      |     |   |        |      |      |        |        |      |      |      |        |      |      |      |      |      |      |      |        |      |      |        |        |      |      |      |       |      |       |        |        |      |      |      |       |      |       |        |        |      |      |      |        |      |      |      |      |      |      |      |        |      |      |        |        |      |      |      |        |      |      |      |      |      |      |      |       |      |       |        |        |      |      |      |
| Lab 5     | 2a                                                                                                                                                                                       | 7.25                                                                                                                                                                                                                                                                                                                                                                                                                                                                                                                                                                                                                                                                                                                                                                                                                                                                                                                                                                                                                                                                                                                                                                                                                                                                                                                                                                                                                                                                                                                                                                                                                                                                                                                                                                                                                                                                                                                                                                                                                                                                                                                                                                                                                                                         | 275.74    | 526.55                             | +ESI                      | AD3                | a         |          |                    |     |       |    |      |        |        |      |     |   |       |      |      |        |        |      |      |      |       |   |       |        |        |      |     |   |        |      |      |        |        |      |      |      |        |      |      |      |      |      |      |      |        |      |      |        |        |      |      |      |       |      |       |        |        |      |      |      |       |      |       |        |        |      |      |      |        |      |      |      |      |      |      |      |        |      |      |        |        |      |      |      |        |      |      |      |      |      |      |      |       |      |       |        |        |      |      |      |
| Lab 4     | 3                                                                                                                                                                                        | 5.90                                                                                                                                                                                                                                                                                                                                                                                                                                                                                                                                                                                                                                                                                                                                                                                                                                                                                                                                                                                                                                                                                                                                                                                                                                                                                                                                                                                                                                                                                                                                                                                                                                                                                                                                                                                                                                                                                                                                                                                                                                                                                                                                                                                                                                                         | 281.18    | 526.55                             | +ESI                      | AD3                | a         |          |                    |     |       |    |      |        |        |      |     |   |       |      |      |        |        |      |      |      |       |   |       |        |        |      |     |   |        |      |      |        |        |      |      |      |        |      |      |      |      |      |      |      |        |      |      |        |        |      |      |      |       |      |       |        |        |      |      |      |       |      |       |        |        |      |      |      |        |      |      |      |      |      |      |      |        |      |      |        |        |      |      |      |        |      |      |      |      |      |      |      |       |      |       |        |        |      |      |      |
| Lab 12    | N.D.                                                                                                                                                                                     | N.D.                                                                                                                                                                                                                                                                                                                                                                                                                                                                                                                                                                                                                                                                                                                                                                                                                                                                                                                                                                                                                                                                                                                                                                                                                                                                                                                                                                                                                                                                                                                                                                                                                                                                                                                                                                                                                                                                                                                                                                                                                                                                                                                                                                                                                                                         | N.D.      | N.D.                               | N.D.                      | N.D.               | N.D.      |          |                    |     |       |    |      |        |        |      |     |   |       |      |      |        |        |      |      |      |       |   |       |        |        |      |     |   |        |      |      |        |        |      |      |      |        |      |      |      |      |      |      |      |        |      |      |        |        |      |      |      |       |      |       |        |        |      |      |      |       |      |       |        |        |      |      |      |        |      |      |      |      |      |      |      |        |      |      |        |        |      |      |      |        |      |      |      |      |      |      |      |       |      |       |        |        |      |      |      |
| Lab 13    | N.D.                                                                                                                                                                                     | N.D.                                                                                                                                                                                                                                                                                                                                                                                                                                                                                                                                                                                                                                                                                                                                                                                                                                                                                                                                                                                                                                                                                                                                                                                                                                                                                                                                                                                                                                                                                                                                                                                                                                                                                                                                                                                                                                                                                                                                                                                                                                                                                                                                                                                                                                                         | N.D.      | N.D.                               | N.D.                      | N.D.               | N.D.      |          |                    |     |       |    |      |        |        |      |     |   |       |      |      |        |        |      |      |      |       |   |       |        |        |      |     |   |        |      |      |        |        |      |      |      |        |      |      |      |      |      |      |      |        |      |      |        |        |      |      |      |       |      |       |        |        |      |      |      |       |      |       |        |        |      |      |      |        |      |      |      |      |      |      |      |        |      |      |        |        |      |      |      |        |      |      |      |      |      |      |      |       |      |       |        |        |      |      |      |
| Lab 15    | 3                                                                                                                                                                                        | 3.09                                                                                                                                                                                                                                                                                                                                                                                                                                                                                                                                                                                                                                                                                                                                                                                                                                                                                                                                                                                                                                                                                                                                                                                                                                                                                                                                                                                                                                                                                                                                                                                                                                                                                                                                                                                                                                                                                                                                                                                                                                                                                                                                                                                                                                                         | 249.49    | 526.55                             | +ESI                      | AD3                | a         |          |                    |     |       |    |      |        |        |      |     |   |       |      |      |        |        |      |      |      |       |   |       |        |        |      |     |   |        |      |      |        |        |      |      |      |        |      |      |      |      |      |      |      |        |      |      |        |        |      |      |      |       |      |       |        |        |      |      |      |       |      |       |        |        |      |      |      |        |      |      |      |      |      |      |      |        |      |      |        |        |      |      |      |        |      |      |      |      |      |      |      |       |      |       |        |        |      |      |      |
| Lab 9     | N.D.                                                                                                                                                                                     | N.D.                                                                                                                                                                                                                                                                                                                                                                                                                                                                                                                                                                                                                                                                                                                                                                                                                                                                                                                                                                                                                                                                                                                                                                                                                                                                                                                                                                                                                                                                                                                                                                                                                                                                                                                                                                                                                                                                                                                                                                                                                                                                                                                                                                                                                                                         | N.D.      | N.D.                               | N.D.                      | N.D.               | N.D.      |          |                    |     |       |    |      |        |        |      |     |   |       |      |      |        |        |      |      |      |       |   |       |        |        |      |     |   |        |      |      |        |        |      |      |      |        |      |      |      |      |      |      |      |        |      |      |        |        |      |      |      |       |      |       |        |        |      |      |      |       |      |       |        |        |      |      |      |        |      |      |      |      |      |      |      |        |      |      |        |        |      |      |      |        |      |      |      |      |      |      |      |       |      |       |        |        |      |      |      |
| Lab 2     | N.D.                                                                                                                                                                                     | N.D.                                                                                                                                                                                                                                                                                                                                                                                                                                                                                                                                                                                                                                                                                                                                                                                                                                                                                                                                                                                                                                                                                                                                                                                                                                                                                                                                                                                                                                                                                                                                                                                                                                                                                                                                                                                                                                                                                                                                                                                                                                                                                                                                                                                                                                                         | N.D.      | N.D.                               | N.D.                      | N.D.               | N.D.      |          |                    |     |       |    |      |        |        |      |     |   |       |      |      |        |        |      |      |      |       |   |       |        |        |      |     |   |        |      |      |        |        |      |      |      |        |      |      |      |      |      |      |      |        |      |      |        |        |      |      |      |       |      |       |        |        |      |      |      |       |      |       |        |        |      |      |      |        |      |      |      |      |      |      |      |        |      |      |        |        |      |      |      |        |      |      |      |      |      |      |      |       |      |       |        |        |      |      |      |
| Lab 18    | N.D.                                                                                                                                                                                     | N.D.                                                                                                                                                                                                                                                                                                                                                                                                                                                                                                                                                                                                                                                                                                                                                                                                                                                                                                                                                                                                                                                                                                                                                                                                                                                                                                                                                                                                                                                                                                                                                                                                                                                                                                                                                                                                                                                                                                                                                                                                                                                                                                                                                                                                                                                         | N.D.      | N.D.                               | N.D.                      | N.D.               | N.D.      |          |                    |     |       |    |      |        |        |      |     |   |       |      |      |        |        |      |      |      |       |   |       |        |        |      |     |   |        |      |      |        |        |      |      |      |        |      |      |      |      |      |      |      |        |      |      |        |        |      |      |      |       |      |       |        |        |      |      |      |       |      |       |        |        |      |      |      |        |      |      |      |      |      |      |      |        |      |      |        |        |      |      |      |        |      |      |      |      |      |      |      |       |      |       |        |        |      |      |      |
| Lab 17    | N.D.                                                                                                                                                                                     | N.D.                                                                                                                                                                                                                                                                                                                                                                                                                                                                                                                                                                                                                                                                                                                                                                                                                                                                                                                                                                                                                                                                                                                                                                                                                                                                                                                                                                                                                                                                                                                                                                                                                                                                                                                                                                                                                                                                                                                                                                                                                                                                                                                                                                                                                                                         | N.D.      | N.D.                               | N.D.                      | N.D.               | N.D.      |          |                    |     |       |    |      |        |        |      |     |   |       |      |      |        |        |      |      |      |       |   |       |        |        |      |     |   |        |      |      |        |        |      |      |      |        |      |      |      |      |      |      |      |        |      |      |        |        |      |      |      |       |      |       |        |        |      |      |      |       |      |       |        |        |      |      |      |        |      |      |      |      |      |      |      |        |      |      |        |        |      |      |      |        |      |      |      |      |      |      |      |       |      |       |        |        |      |      |      |
| Lab 10    | N.D.                                                                                                                                                                                     | N.D.                                                                                                                                                                                                                                                                                                                                                                                                                                                                                                                                                                                                                                                                                                                                                                                                                                                                                                                                                                                                                                                                                                                                                                                                                                                                                                                                                                                                                                                                                                                                                                                                                                                                                                                                                                                                                                                                                                                                                                                                                                                                                                                                                                                                                                                         | N.D.      | N.D.                               | N.D.                      | N.D.               | N.D.      |          |                    |     |       |    |      |        |        |      |     |   |       |      |      |        |        |      |      |      |       |   |       |        |        |      |     |   |        |      |      |        |        |      |      |      |        |      |      |      |      |      |      |      |        |      |      |        |        |      |      |      |       |      |       |        |        |      |      |      |       |      |       |        |        |      |      |      |        |      |      |      |      |      |      |      |        |      |      |        |        |      |      |      |        |      |      |      |      |      |      |      |       |      |       |        |        |      |      |      |
| Lab 7     | N.D.                                                                                                                                                                                     | N.D.                                                                                                                                                                                                                                                                                                                                                                                                                                                                                                                                                                                                                                                                                                                                                                                                                                                                                                                                                                                                                                                                                                                                                                                                                                                                                                                                                                                                                                                                                                                                                                                                                                                                                                                                                                                                                                                                                                                                                                                                                                                                                                                                                                                                                                                         | N.D.      | N.D.                               | N.D.                      | N.D.               | N.D.      |          |                    |     |       |    |      |        |        |      |     |   |       |      |      |        |        |      |      |      |       |   |       |        |        |      |     |   |        |      |      |        |        |      |      |      |        |      |      |      |      |      |      |      |        |      |      |        |        |      |      |      |       |      |       |        |        |      |      |      |       |      |       |        |        |      |      |      |        |      |      |      |      |      |      |      |        |      |      |        |        |      |      |      |        |      |      |      |      |      |      |      |       |      |       |        |        |      |      |      |



| No.       | multiple comparison procedure plot                                                                                               | RTI details                                                                                                                                                                                                                                                                                                                                                                                                                                                                                                                                                                                                                                                                                                                                                                                                                                                                                                                                                                                                                                                                                                                                                                                                                                                                                                                                                                                                                                                                                                                                                                                                                                                                                                                                                                                                                                                                                                                                                                                                                                                                                                                                                                                                                                                  |           |                                    |                           |                    |           |          |                    |     |       |    |      |        |        |      |     |   |       |      |      |        |        |      |      |      |       |   |      |        |        |      |     |   |        |      |      |        |        |      |      |      |        |      |      |      |      |      |      |      |        |      |      |        |        |      |      |      |       |      |      |      |      |      |      |      |       |      |      |      |      |      |      |      |        |      |      |      |      |      |      |      |        |      |      |        |        |      |      |      |        |      |      |      |      |      |      |      |       |      |      |      |      |      |      |      |
|-----------|----------------------------------------------------------------------------------------------------------------------------------|--------------------------------------------------------------------------------------------------------------------------------------------------------------------------------------------------------------------------------------------------------------------------------------------------------------------------------------------------------------------------------------------------------------------------------------------------------------------------------------------------------------------------------------------------------------------------------------------------------------------------------------------------------------------------------------------------------------------------------------------------------------------------------------------------------------------------------------------------------------------------------------------------------------------------------------------------------------------------------------------------------------------------------------------------------------------------------------------------------------------------------------------------------------------------------------------------------------------------------------------------------------------------------------------------------------------------------------------------------------------------------------------------------------------------------------------------------------------------------------------------------------------------------------------------------------------------------------------------------------------------------------------------------------------------------------------------------------------------------------------------------------------------------------------------------------------------------------------------------------------------------------------------------------------------------------------------------------------------------------------------------------------------------------------------------------------------------------------------------------------------------------------------------------------------------------------------------------------------------------------------------------|-----------|------------------------------------|---------------------------|--------------------|-----------|----------|--------------------|-----|-------|----|------|--------|--------|------|-----|---|-------|------|------|--------|--------|------|------|------|-------|---|------|--------|--------|------|-----|---|--------|------|------|--------|--------|------|------|------|--------|------|------|------|------|------|------|------|--------|------|------|--------|--------|------|------|------|-------|------|------|------|------|------|------|------|-------|------|------|------|------|------|------|------|--------|------|------|------|------|------|------|------|--------|------|------|--------|--------|------|------|------|--------|------|------|------|------|------|------|------|-------|------|------|------|------|------|------|------|
| (12)      | <p><b>Comparison of Exp. RTI values: Octaethylene glycol</b></p> <p>No groups have means significantly different from Lab 06</p> | <table border="1"> <thead> <tr> <th>Institute</th> <th>Level of identification confidence</th> <th>Exp. t<sub>R</sub> (min)</th> <th>Exp. RTI</th> <th>Pred. RTI</th> <th>ESI mode</th> <th>Application domain</th> <th>MCP</th> </tr> </thead> <tbody> <tr><td>Lab 6</td><td>2a</td><td>4.23</td><td>223.01</td><td>540.33</td><td>+ESI</td><td>AD4</td><td>a</td></tr> <tr><td>Lab 5</td><td>2a</td><td>7.80</td><td>302.91</td><td>540.33</td><td>+ESI</td><td>AD3</td><td>a</td></tr> <tr><td>Lab 4</td><td>3</td><td>6.10</td><td>293.64</td><td>540.33</td><td>+ESI</td><td>AD3</td><td>a</td></tr> <tr><td>Lab 12</td><td>N.D.</td><td>N.D.</td><td>N.D.</td><td>N.D.</td><td>N.D.</td><td>N.D.</td><td>N.D.</td></tr> <tr><td>Lab 13</td><td>N.D.</td><td>N.D.</td><td>N.D.</td><td>N.D.</td><td>N.D.</td><td>N.D.</td><td>N.D.</td></tr> <tr><td>Lab 15</td><td>3</td><td>3.47</td><td>281.39</td><td>540.33</td><td>+ESI</td><td>AD3</td><td>a</td></tr> <tr><td>Lab 9</td><td>N.D.</td><td>N.D.</td><td>N.D.</td><td>N.D.</td><td>N.D.</td><td>N.D.</td><td>N.D.</td></tr> <tr><td>Lab 2</td><td>N.D.</td><td>N.D.</td><td>N.D.</td><td>N.D.</td><td>N.D.</td><td>N.D.</td><td>N.D.</td></tr> <tr><td>Lab 18</td><td>N.D.</td><td>N.D.</td><td>N.D.</td><td>N.D.</td><td>N.D.</td><td>N.D.</td><td>N.D.</td></tr> <tr><td>Lab 17</td><td>N.D.</td><td>N.D.</td><td>N.D.</td><td>N.D.</td><td>N.D.</td><td>N.D.</td><td>N.D.</td></tr> <tr><td>Lab 10</td><td>N.D.</td><td>N.D.</td><td>N.D.</td><td>N.D.</td><td>N.D.</td><td>N.D.</td><td>N.D.</td></tr> <tr><td>Lab 7</td><td>N.D.</td><td>N.D.</td><td>N.D.</td><td>N.D.</td><td>N.D.</td><td>N.D.</td><td>N.D.</td></tr> </tbody> </table> <p>AD3: Pred./Exp. t<sub>R</sub> are not reliable (high SR; use other verification tools (box3))<br/> AD4: Pred./Exp. t<sub>R</sub> are not reliable (Outside the applicability domain and high SR; use other verification tools (box4))<br/> N.D.: Not detected.<br/> Note: This compound is outside of AD of models, but the exp. RTI is comparable. All institutes have acceptable exp. RTI values and the difference is <b>not significant at 99% CIs</b> of the calibration curve.<br/> <b>Promote “Lab 15” &amp; “Lab 4” to level 2!</b></p> | Institute | Level of identification confidence | Exp. t <sub>R</sub> (min) | Exp. RTI           | Pred. RTI | ESI mode | Application domain | MCP | Lab 6 | 2a | 4.23 | 223.01 | 540.33 | +ESI | AD4 | a | Lab 5 | 2a   | 7.80 | 302.91 | 540.33 | +ESI | AD3  | a    | Lab 4 | 3 | 6.10 | 293.64 | 540.33 | +ESI | AD3 | a | Lab 12 | N.D. | N.D. | N.D.   | N.D.   | N.D. | N.D. | N.D. | Lab 13 | N.D. | N.D. | N.D. | N.D. | N.D. | N.D. | N.D. | Lab 15 | 3    | 3.47 | 281.39 | 540.33 | +ESI | AD3  | a    | Lab 9 | N.D. | N.D. | N.D. | N.D. | N.D. | N.D. | N.D. | Lab 2 | N.D. | N.D. | N.D. | N.D. | N.D. | N.D. | N.D. | Lab 18 | N.D. | N.D. | N.D. | N.D. | N.D. | N.D. | N.D. | Lab 17 | N.D. | N.D. | N.D.   | N.D.   | N.D. | N.D. | N.D. | Lab 10 | N.D. | N.D. | N.D. | N.D. | N.D. | N.D. | N.D. | Lab 7 | N.D. | N.D. | N.D. | N.D. | N.D. | N.D. | N.D. |
| Institute | Level of identification confidence                                                                                               | Exp. t <sub>R</sub> (min)                                                                                                                                                                                                                                                                                                                                                                                                                                                                                                                                                                                                                                                                                                                                                                                                                                                                                                                                                                                                                                                                                                                                                                                                                                                                                                                                                                                                                                                                                                                                                                                                                                                                                                                                                                                                                                                                                                                                                                                                                                                                                                                                                                                                                                    | Exp. RTI  | Pred. RTI                          | ESI mode                  | Application domain | MCP       |          |                    |     |       |    |      |        |        |      |     |   |       |      |      |        |        |      |      |      |       |   |      |        |        |      |     |   |        |      |      |        |        |      |      |      |        |      |      |      |      |      |      |      |        |      |      |        |        |      |      |      |       |      |      |      |      |      |      |      |       |      |      |      |      |      |      |      |        |      |      |      |      |      |      |      |        |      |      |        |        |      |      |      |        |      |      |      |      |      |      |      |       |      |      |      |      |      |      |      |
| Lab 6     | 2a                                                                                                                               | 4.23                                                                                                                                                                                                                                                                                                                                                                                                                                                                                                                                                                                                                                                                                                                                                                                                                                                                                                                                                                                                                                                                                                                                                                                                                                                                                                                                                                                                                                                                                                                                                                                                                                                                                                                                                                                                                                                                                                                                                                                                                                                                                                                                                                                                                                                         | 223.01    | 540.33                             | +ESI                      | AD4                | a         |          |                    |     |       |    |      |        |        |      |     |   |       |      |      |        |        |      |      |      |       |   |      |        |        |      |     |   |        |      |      |        |        |      |      |      |        |      |      |      |      |      |      |      |        |      |      |        |        |      |      |      |       |      |      |      |      |      |      |      |       |      |      |      |      |      |      |      |        |      |      |      |      |      |      |      |        |      |      |        |        |      |      |      |        |      |      |      |      |      |      |      |       |      |      |      |      |      |      |      |
| Lab 5     | 2a                                                                                                                               | 7.80                                                                                                                                                                                                                                                                                                                                                                                                                                                                                                                                                                                                                                                                                                                                                                                                                                                                                                                                                                                                                                                                                                                                                                                                                                                                                                                                                                                                                                                                                                                                                                                                                                                                                                                                                                                                                                                                                                                                                                                                                                                                                                                                                                                                                                                         | 302.91    | 540.33                             | +ESI                      | AD3                | a         |          |                    |     |       |    |      |        |        |      |     |   |       |      |      |        |        |      |      |      |       |   |      |        |        |      |     |   |        |      |      |        |        |      |      |      |        |      |      |      |      |      |      |      |        |      |      |        |        |      |      |      |       |      |      |      |      |      |      |      |       |      |      |      |      |      |      |      |        |      |      |      |      |      |      |      |        |      |      |        |        |      |      |      |        |      |      |      |      |      |      |      |       |      |      |      |      |      |      |      |
| Lab 4     | 3                                                                                                                                | 6.10                                                                                                                                                                                                                                                                                                                                                                                                                                                                                                                                                                                                                                                                                                                                                                                                                                                                                                                                                                                                                                                                                                                                                                                                                                                                                                                                                                                                                                                                                                                                                                                                                                                                                                                                                                                                                                                                                                                                                                                                                                                                                                                                                                                                                                                         | 293.64    | 540.33                             | +ESI                      | AD3                | a         |          |                    |     |       |    |      |        |        |      |     |   |       |      |      |        |        |      |      |      |       |   |      |        |        |      |     |   |        |      |      |        |        |      |      |      |        |      |      |      |      |      |      |      |        |      |      |        |        |      |      |      |       |      |      |      |      |      |      |      |       |      |      |      |      |      |      |      |        |      |      |      |      |      |      |      |        |      |      |        |        |      |      |      |        |      |      |      |      |      |      |      |       |      |      |      |      |      |      |      |
| Lab 12    | N.D.                                                                                                                             | N.D.                                                                                                                                                                                                                                                                                                                                                                                                                                                                                                                                                                                                                                                                                                                                                                                                                                                                                                                                                                                                                                                                                                                                                                                                                                                                                                                                                                                                                                                                                                                                                                                                                                                                                                                                                                                                                                                                                                                                                                                                                                                                                                                                                                                                                                                         | N.D.      | N.D.                               | N.D.                      | N.D.               | N.D.      |          |                    |     |       |    |      |        |        |      |     |   |       |      |      |        |        |      |      |      |       |   |      |        |        |      |     |   |        |      |      |        |        |      |      |      |        |      |      |      |      |      |      |      |        |      |      |        |        |      |      |      |       |      |      |      |      |      |      |      |       |      |      |      |      |      |      |      |        |      |      |      |      |      |      |      |        |      |      |        |        |      |      |      |        |      |      |      |      |      |      |      |       |      |      |      |      |      |      |      |
| Lab 13    | N.D.                                                                                                                             | N.D.                                                                                                                                                                                                                                                                                                                                                                                                                                                                                                                                                                                                                                                                                                                                                                                                                                                                                                                                                                                                                                                                                                                                                                                                                                                                                                                                                                                                                                                                                                                                                                                                                                                                                                                                                                                                                                                                                                                                                                                                                                                                                                                                                                                                                                                         | N.D.      | N.D.                               | N.D.                      | N.D.               | N.D.      |          |                    |     |       |    |      |        |        |      |     |   |       |      |      |        |        |      |      |      |       |   |      |        |        |      |     |   |        |      |      |        |        |      |      |      |        |      |      |      |      |      |      |      |        |      |      |        |        |      |      |      |       |      |      |      |      |      |      |      |       |      |      |      |      |      |      |      |        |      |      |      |      |      |      |      |        |      |      |        |        |      |      |      |        |      |      |      |      |      |      |      |       |      |      |      |      |      |      |      |
| Lab 15    | 3                                                                                                                                | 3.47                                                                                                                                                                                                                                                                                                                                                                                                                                                                                                                                                                                                                                                                                                                                                                                                                                                                                                                                                                                                                                                                                                                                                                                                                                                                                                                                                                                                                                                                                                                                                                                                                                                                                                                                                                                                                                                                                                                                                                                                                                                                                                                                                                                                                                                         | 281.39    | 540.33                             | +ESI                      | AD3                | a         |          |                    |     |       |    |      |        |        |      |     |   |       |      |      |        |        |      |      |      |       |   |      |        |        |      |     |   |        |      |      |        |        |      |      |      |        |      |      |      |      |      |      |      |        |      |      |        |        |      |      |      |       |      |      |      |      |      |      |      |       |      |      |      |      |      |      |      |        |      |      |      |      |      |      |      |        |      |      |        |        |      |      |      |        |      |      |      |      |      |      |      |       |      |      |      |      |      |      |      |
| Lab 9     | N.D.                                                                                                                             | N.D.                                                                                                                                                                                                                                                                                                                                                                                                                                                                                                                                                                                                                                                                                                                                                                                                                                                                                                                                                                                                                                                                                                                                                                                                                                                                                                                                                                                                                                                                                                                                                                                                                                                                                                                                                                                                                                                                                                                                                                                                                                                                                                                                                                                                                                                         | N.D.      | N.D.                               | N.D.                      | N.D.               | N.D.      |          |                    |     |       |    |      |        |        |      |     |   |       |      |      |        |        |      |      |      |       |   |      |        |        |      |     |   |        |      |      |        |        |      |      |      |        |      |      |      |      |      |      |      |        |      |      |        |        |      |      |      |       |      |      |      |      |      |      |      |       |      |      |      |      |      |      |      |        |      |      |      |      |      |      |      |        |      |      |        |        |      |      |      |        |      |      |      |      |      |      |      |       |      |      |      |      |      |      |      |
| Lab 2     | N.D.                                                                                                                             | N.D.                                                                                                                                                                                                                                                                                                                                                                                                                                                                                                                                                                                                                                                                                                                                                                                                                                                                                                                                                                                                                                                                                                                                                                                                                                                                                                                                                                                                                                                                                                                                                                                                                                                                                                                                                                                                                                                                                                                                                                                                                                                                                                                                                                                                                                                         | N.D.      | N.D.                               | N.D.                      | N.D.               | N.D.      |          |                    |     |       |    |      |        |        |      |     |   |       |      |      |        |        |      |      |      |       |   |      |        |        |      |     |   |        |      |      |        |        |      |      |      |        |      |      |      |      |      |      |      |        |      |      |        |        |      |      |      |       |      |      |      |      |      |      |      |       |      |      |      |      |      |      |      |        |      |      |      |      |      |      |      |        |      |      |        |        |      |      |      |        |      |      |      |      |      |      |      |       |      |      |      |      |      |      |      |
| Lab 18    | N.D.                                                                                                                             | N.D.                                                                                                                                                                                                                                                                                                                                                                                                                                                                                                                                                                                                                                                                                                                                                                                                                                                                                                                                                                                                                                                                                                                                                                                                                                                                                                                                                                                                                                                                                                                                                                                                                                                                                                                                                                                                                                                                                                                                                                                                                                                                                                                                                                                                                                                         | N.D.      | N.D.                               | N.D.                      | N.D.               | N.D.      |          |                    |     |       |    |      |        |        |      |     |   |       |      |      |        |        |      |      |      |       |   |      |        |        |      |     |   |        |      |      |        |        |      |      |      |        |      |      |      |      |      |      |      |        |      |      |        |        |      |      |      |       |      |      |      |      |      |      |      |       |      |      |      |      |      |      |      |        |      |      |      |      |      |      |      |        |      |      |        |        |      |      |      |        |      |      |      |      |      |      |      |       |      |      |      |      |      |      |      |
| Lab 17    | N.D.                                                                                                                             | N.D.                                                                                                                                                                                                                                                                                                                                                                                                                                                                                                                                                                                                                                                                                                                                                                                                                                                                                                                                                                                                                                                                                                                                                                                                                                                                                                                                                                                                                                                                                                                                                                                                                                                                                                                                                                                                                                                                                                                                                                                                                                                                                                                                                                                                                                                         | N.D.      | N.D.                               | N.D.                      | N.D.               | N.D.      |          |                    |     |       |    |      |        |        |      |     |   |       |      |      |        |        |      |      |      |       |   |      |        |        |      |     |   |        |      |      |        |        |      |      |      |        |      |      |      |      |      |      |      |        |      |      |        |        |      |      |      |       |      |      |      |      |      |      |      |       |      |      |      |      |      |      |      |        |      |      |      |      |      |      |      |        |      |      |        |        |      |      |      |        |      |      |      |      |      |      |      |       |      |      |      |      |      |      |      |
| Lab 10    | N.D.                                                                                                                             | N.D.                                                                                                                                                                                                                                                                                                                                                                                                                                                                                                                                                                                                                                                                                                                                                                                                                                                                                                                                                                                                                                                                                                                                                                                                                                                                                                                                                                                                                                                                                                                                                                                                                                                                                                                                                                                                                                                                                                                                                                                                                                                                                                                                                                                                                                                         | N.D.      | N.D.                               | N.D.                      | N.D.               | N.D.      |          |                    |     |       |    |      |        |        |      |     |   |       |      |      |        |        |      |      |      |       |   |      |        |        |      |     |   |        |      |      |        |        |      |      |      |        |      |      |      |      |      |      |      |        |      |      |        |        |      |      |      |       |      |      |      |      |      |      |      |       |      |      |      |      |      |      |      |        |      |      |      |      |      |      |      |        |      |      |        |        |      |      |      |        |      |      |      |      |      |      |      |       |      |      |      |      |      |      |      |
| Lab 7     | N.D.                                                                                                                             | N.D.                                                                                                                                                                                                                                                                                                                                                                                                                                                                                                                                                                                                                                                                                                                                                                                                                                                                                                                                                                                                                                                                                                                                                                                                                                                                                                                                                                                                                                                                                                                                                                                                                                                                                                                                                                                                                                                                                                                                                                                                                                                                                                                                                                                                                                                         | N.D.      | N.D.                               | N.D.                      | N.D.               | N.D.      |          |                    |     |       |    |      |        |        |      |     |   |       |      |      |        |        |      |      |      |       |   |      |        |        |      |     |   |        |      |      |        |        |      |      |      |        |      |      |      |      |      |      |      |        |      |      |        |        |      |      |      |       |      |      |      |      |      |      |      |       |      |      |      |      |      |      |      |        |      |      |      |      |      |      |      |        |      |      |        |        |      |      |      |        |      |      |      |      |      |      |      |       |      |      |      |      |      |      |      |
| (13)      | <p><b>Comparison of Exp. RTI values: (-)-codeine</b></p> <p>No groups have means significantly different from Lab 06</p>         | <table border="1"> <thead> <tr> <th>Institute</th> <th>Level of identification confidence</th> <th>Exp. t<sub>R</sub> (min)</th> <th>Exp. RTI</th> <th>Pred. RTI</th> <th>ESI mode</th> <th>Application domain</th> <th>MCP</th> </tr> </thead> <tbody> <tr><td>Lab 6</td><td>1</td><td>3.56</td><td>172.00</td><td>163.83</td><td>+ESI</td><td>AD1</td><td>a</td></tr> <tr><td>Lab 5</td><td>N.D.</td><td>N.D.</td><td>N.D.</td><td>N.D.</td><td>N.D.</td><td>N.D.</td><td>N.D.</td></tr> <tr><td>Lab 4</td><td>2</td><td>5.44</td><td>252.27</td><td>163.83</td><td>+ESI</td><td>AD1</td><td>a</td></tr> <tr><td>Lab 12</td><td>2a</td><td>2.08</td><td>179.95</td><td>163.83</td><td>+ESI</td><td>AD1</td><td>a</td></tr> <tr><td>Lab 13</td><td>N.D.</td><td>N.D.</td><td>N.D.</td><td>N.D.</td><td>N.D.</td><td>N.D.</td><td>N.D.</td></tr> <tr><td>Lab 15</td><td>N.D.</td><td>N.D.</td><td>N.D.</td><td>N.D.</td><td>N.D.</td><td>N.D.</td><td>N.D.</td></tr> <tr><td>Lab 9</td><td>N.D.</td><td>N.D.</td><td>N.D.</td><td>N.D.</td><td>N.D.</td><td>N.D.</td><td>N.D.</td></tr> <tr><td>Lab 2</td><td>N.D.</td><td>N.D.</td><td>N.D.</td><td>N.D.</td><td>N.D.</td><td>N.D.</td><td>N.D.</td></tr> <tr><td>Lab 18</td><td>N.D.</td><td>N.D.</td><td>N.D.</td><td>N.D.</td><td>N.D.</td><td>N.D.</td><td>N.D.</td></tr> <tr><td>Lab 17</td><td>3</td><td>2.57</td><td>119.95</td><td>163.83</td><td>+ESI</td><td>AD1</td><td>a</td></tr> <tr><td>Lab 10</td><td>N.D.</td><td>N.D.</td><td>N.D.</td><td>N.D.</td><td>N.D.</td><td>N.D.</td><td>N.D.</td></tr> <tr><td>Lab 7</td><td>N.D.</td><td>N.D.</td><td>N.D.</td><td>N.D.</td><td>N.D.</td><td>N.D.</td><td>N.D.</td></tr> </tbody> </table> <p>AD1: Exp. &amp; Pred. t<sub>R</sub> are accepted for this candidate (box1)<br/> N.D.: Not detected.<br/> All institutes have acceptable exp. RTI values and the difference is <b>not significant at 99% CIs</b> of the calibration curve. <b>Promote “Lab 17” to level 2!</b></p>                                                                                                                                                                                                                                                                | Institute | Level of identification confidence | Exp. t <sub>R</sub> (min) | Exp. RTI           | Pred. RTI | ESI mode | Application domain | MCP | Lab 6 | 1  | 3.56 | 172.00 | 163.83 | +ESI | AD1 | a | Lab 5 | N.D. | N.D. | N.D.   | N.D.   | N.D. | N.D. | N.D. | Lab 4 | 2 | 5.44 | 252.27 | 163.83 | +ESI | AD1 | a | Lab 12 | 2a   | 2.08 | 179.95 | 163.83 | +ESI | AD1  | a    | Lab 13 | N.D. | N.D. | N.D. | N.D. | N.D. | N.D. | N.D. | Lab 15 | N.D. | N.D. | N.D.   | N.D.   | N.D. | N.D. | N.D. | Lab 9 | N.D. | N.D. | N.D. | N.D. | N.D. | N.D. | N.D. | Lab 2 | N.D. | N.D. | N.D. | N.D. | N.D. | N.D. | N.D. | Lab 18 | N.D. | N.D. | N.D. | N.D. | N.D. | N.D. | N.D. | Lab 17 | 3    | 2.57 | 119.95 | 163.83 | +ESI | AD1  | a    | Lab 10 | N.D. | N.D. | N.D. | N.D. | N.D. | N.D. | N.D. | Lab 7 | N.D. | N.D. | N.D. | N.D. | N.D. | N.D. | N.D. |
| Institute | Level of identification confidence                                                                                               | Exp. t <sub>R</sub> (min)                                                                                                                                                                                                                                                                                                                                                                                                                                                                                                                                                                                                                                                                                                                                                                                                                                                                                                                                                                                                                                                                                                                                                                                                                                                                                                                                                                                                                                                                                                                                                                                                                                                                                                                                                                                                                                                                                                                                                                                                                                                                                                                                                                                                                                    | Exp. RTI  | Pred. RTI                          | ESI mode                  | Application domain | MCP       |          |                    |     |       |    |      |        |        |      |     |   |       |      |      |        |        |      |      |      |       |   |      |        |        |      |     |   |        |      |      |        |        |      |      |      |        |      |      |      |      |      |      |      |        |      |      |        |        |      |      |      |       |      |      |      |      |      |      |      |       |      |      |      |      |      |      |      |        |      |      |      |      |      |      |      |        |      |      |        |        |      |      |      |        |      |      |      |      |      |      |      |       |      |      |      |      |      |      |      |
| Lab 6     | 1                                                                                                                                | 3.56                                                                                                                                                                                                                                                                                                                                                                                                                                                                                                                                                                                                                                                                                                                                                                                                                                                                                                                                                                                                                                                                                                                                                                                                                                                                                                                                                                                                                                                                                                                                                                                                                                                                                                                                                                                                                                                                                                                                                                                                                                                                                                                                                                                                                                                         | 172.00    | 163.83                             | +ESI                      | AD1                | a         |          |                    |     |       |    |      |        |        |      |     |   |       |      |      |        |        |      |      |      |       |   |      |        |        |      |     |   |        |      |      |        |        |      |      |      |        |      |      |      |      |      |      |      |        |      |      |        |        |      |      |      |       |      |      |      |      |      |      |      |       |      |      |      |      |      |      |      |        |      |      |      |      |      |      |      |        |      |      |        |        |      |      |      |        |      |      |      |      |      |      |      |       |      |      |      |      |      |      |      |
| Lab 5     | N.D.                                                                                                                             | N.D.                                                                                                                                                                                                                                                                                                                                                                                                                                                                                                                                                                                                                                                                                                                                                                                                                                                                                                                                                                                                                                                                                                                                                                                                                                                                                                                                                                                                                                                                                                                                                                                                                                                                                                                                                                                                                                                                                                                                                                                                                                                                                                                                                                                                                                                         | N.D.      | N.D.                               | N.D.                      | N.D.               | N.D.      |          |                    |     |       |    |      |        |        |      |     |   |       |      |      |        |        |      |      |      |       |   |      |        |        |      |     |   |        |      |      |        |        |      |      |      |        |      |      |      |      |      |      |      |        |      |      |        |        |      |      |      |       |      |      |      |      |      |      |      |       |      |      |      |      |      |      |      |        |      |      |      |      |      |      |      |        |      |      |        |        |      |      |      |        |      |      |      |      |      |      |      |       |      |      |      |      |      |      |      |
| Lab 4     | 2                                                                                                                                | 5.44                                                                                                                                                                                                                                                                                                                                                                                                                                                                                                                                                                                                                                                                                                                                                                                                                                                                                                                                                                                                                                                                                                                                                                                                                                                                                                                                                                                                                                                                                                                                                                                                                                                                                                                                                                                                                                                                                                                                                                                                                                                                                                                                                                                                                                                         | 252.27    | 163.83                             | +ESI                      | AD1                | a         |          |                    |     |       |    |      |        |        |      |     |   |       |      |      |        |        |      |      |      |       |   |      |        |        |      |     |   |        |      |      |        |        |      |      |      |        |      |      |      |      |      |      |      |        |      |      |        |        |      |      |      |       |      |      |      |      |      |      |      |       |      |      |      |      |      |      |      |        |      |      |      |      |      |      |      |        |      |      |        |        |      |      |      |        |      |      |      |      |      |      |      |       |      |      |      |      |      |      |      |
| Lab 12    | 2a                                                                                                                               | 2.08                                                                                                                                                                                                                                                                                                                                                                                                                                                                                                                                                                                                                                                                                                                                                                                                                                                                                                                                                                                                                                                                                                                                                                                                                                                                                                                                                                                                                                                                                                                                                                                                                                                                                                                                                                                                                                                                                                                                                                                                                                                                                                                                                                                                                                                         | 179.95    | 163.83                             | +ESI                      | AD1                | a         |          |                    |     |       |    |      |        |        |      |     |   |       |      |      |        |        |      |      |      |       |   |      |        |        |      |     |   |        |      |      |        |        |      |      |      |        |      |      |      |      |      |      |      |        |      |      |        |        |      |      |      |       |      |      |      |      |      |      |      |       |      |      |      |      |      |      |      |        |      |      |      |      |      |      |      |        |      |      |        |        |      |      |      |        |      |      |      |      |      |      |      |       |      |      |      |      |      |      |      |
| Lab 13    | N.D.                                                                                                                             | N.D.                                                                                                                                                                                                                                                                                                                                                                                                                                                                                                                                                                                                                                                                                                                                                                                                                                                                                                                                                                                                                                                                                                                                                                                                                                                                                                                                                                                                                                                                                                                                                                                                                                                                                                                                                                                                                                                                                                                                                                                                                                                                                                                                                                                                                                                         | N.D.      | N.D.                               | N.D.                      | N.D.               | N.D.      |          |                    |     |       |    |      |        |        |      |     |   |       |      |      |        |        |      |      |      |       |   |      |        |        |      |     |   |        |      |      |        |        |      |      |      |        |      |      |      |      |      |      |      |        |      |      |        |        |      |      |      |       |      |      |      |      |      |      |      |       |      |      |      |      |      |      |      |        |      |      |      |      |      |      |      |        |      |      |        |        |      |      |      |        |      |      |      |      |      |      |      |       |      |      |      |      |      |      |      |
| Lab 15    | N.D.                                                                                                                             | N.D.                                                                                                                                                                                                                                                                                                                                                                                                                                                                                                                                                                                                                                                                                                                                                                                                                                                                                                                                                                                                                                                                                                                                                                                                                                                                                                                                                                                                                                                                                                                                                                                                                                                                                                                                                                                                                                                                                                                                                                                                                                                                                                                                                                                                                                                         | N.D.      | N.D.                               | N.D.                      | N.D.               | N.D.      |          |                    |     |       |    |      |        |        |      |     |   |       |      |      |        |        |      |      |      |       |   |      |        |        |      |     |   |        |      |      |        |        |      |      |      |        |      |      |      |      |      |      |      |        |      |      |        |        |      |      |      |       |      |      |      |      |      |      |      |       |      |      |      |      |      |      |      |        |      |      |      |      |      |      |      |        |      |      |        |        |      |      |      |        |      |      |      |      |      |      |      |       |      |      |      |      |      |      |      |
| Lab 9     | N.D.                                                                                                                             | N.D.                                                                                                                                                                                                                                                                                                                                                                                                                                                                                                                                                                                                                                                                                                                                                                                                                                                                                                                                                                                                                                                                                                                                                                                                                                                                                                                                                                                                                                                                                                                                                                                                                                                                                                                                                                                                                                                                                                                                                                                                                                                                                                                                                                                                                                                         | N.D.      | N.D.                               | N.D.                      | N.D.               | N.D.      |          |                    |     |       |    |      |        |        |      |     |   |       |      |      |        |        |      |      |      |       |   |      |        |        |      |     |   |        |      |      |        |        |      |      |      |        |      |      |      |      |      |      |      |        |      |      |        |        |      |      |      |       |      |      |      |      |      |      |      |       |      |      |      |      |      |      |      |        |      |      |      |      |      |      |      |        |      |      |        |        |      |      |      |        |      |      |      |      |      |      |      |       |      |      |      |      |      |      |      |
| Lab 2     | N.D.                                                                                                                             | N.D.                                                                                                                                                                                                                                                                                                                                                                                                                                                                                                                                                                                                                                                                                                                                                                                                                                                                                                                                                                                                                                                                                                                                                                                                                                                                                                                                                                                                                                                                                                                                                                                                                                                                                                                                                                                                                                                                                                                                                                                                                                                                                                                                                                                                                                                         | N.D.      | N.D.                               | N.D.                      | N.D.               | N.D.      |          |                    |     |       |    |      |        |        |      |     |   |       |      |      |        |        |      |      |      |       |   |      |        |        |      |     |   |        |      |      |        |        |      |      |      |        |      |      |      |      |      |      |      |        |      |      |        |        |      |      |      |       |      |      |      |      |      |      |      |       |      |      |      |      |      |      |      |        |      |      |      |      |      |      |      |        |      |      |        |        |      |      |      |        |      |      |      |      |      |      |      |       |      |      |      |      |      |      |      |
| Lab 18    | N.D.                                                                                                                             | N.D.                                                                                                                                                                                                                                                                                                                                                                                                                                                                                                                                                                                                                                                                                                                                                                                                                                                                                                                                                                                                                                                                                                                                                                                                                                                                                                                                                                                                                                                                                                                                                                                                                                                                                                                                                                                                                                                                                                                                                                                                                                                                                                                                                                                                                                                         | N.D.      | N.D.                               | N.D.                      | N.D.               | N.D.      |          |                    |     |       |    |      |        |        |      |     |   |       |      |      |        |        |      |      |      |       |   |      |        |        |      |     |   |        |      |      |        |        |      |      |      |        |      |      |      |      |      |      |      |        |      |      |        |        |      |      |      |       |      |      |      |      |      |      |      |       |      |      |      |      |      |      |      |        |      |      |      |      |      |      |      |        |      |      |        |        |      |      |      |        |      |      |      |      |      |      |      |       |      |      |      |      |      |      |      |
| Lab 17    | 3                                                                                                                                | 2.57                                                                                                                                                                                                                                                                                                                                                                                                                                                                                                                                                                                                                                                                                                                                                                                                                                                                                                                                                                                                                                                                                                                                                                                                                                                                                                                                                                                                                                                                                                                                                                                                                                                                                                                                                                                                                                                                                                                                                                                                                                                                                                                                                                                                                                                         | 119.95    | 163.83                             | +ESI                      | AD1                | a         |          |                    |     |       |    |      |        |        |      |     |   |       |      |      |        |        |      |      |      |       |   |      |        |        |      |     |   |        |      |      |        |        |      |      |      |        |      |      |      |      |      |      |      |        |      |      |        |        |      |      |      |       |      |      |      |      |      |      |      |       |      |      |      |      |      |      |      |        |      |      |      |      |      |      |      |        |      |      |        |        |      |      |      |        |      |      |      |      |      |      |      |       |      |      |      |      |      |      |      |
| Lab 10    | N.D.                                                                                                                             | N.D.                                                                                                                                                                                                                                                                                                                                                                                                                                                                                                                                                                                                                                                                                                                                                                                                                                                                                                                                                                                                                                                                                                                                                                                                                                                                                                                                                                                                                                                                                                                                                                                                                                                                                                                                                                                                                                                                                                                                                                                                                                                                                                                                                                                                                                                         | N.D.      | N.D.                               | N.D.                      | N.D.               | N.D.      |          |                    |     |       |    |      |        |        |      |     |   |       |      |      |        |        |      |      |      |       |   |      |        |        |      |     |   |        |      |      |        |        |      |      |      |        |      |      |      |      |      |      |      |        |      |      |        |        |      |      |      |       |      |      |      |      |      |      |      |       |      |      |      |      |      |      |      |        |      |      |      |      |      |      |      |        |      |      |        |        |      |      |      |        |      |      |      |      |      |      |      |       |      |      |      |      |      |      |      |
| Lab 7     | N.D.                                                                                                                             | N.D.                                                                                                                                                                                                                                                                                                                                                                                                                                                                                                                                                                                                                                                                                                                                                                                                                                                                                                                                                                                                                                                                                                                                                                                                                                                                                                                                                                                                                                                                                                                                                                                                                                                                                                                                                                                                                                                                                                                                                                                                                                                                                                                                                                                                                                                         | N.D.      | N.D.                               | N.D.                      | N.D.               | N.D.      |          |                    |     |       |    |      |        |        |      |     |   |       |      |      |        |        |      |      |      |       |   |      |        |        |      |     |   |        |      |      |        |        |      |      |      |        |      |      |      |      |      |      |      |        |      |      |        |        |      |      |      |       |      |      |      |      |      |      |      |       |      |      |      |      |      |      |      |        |      |      |      |      |      |      |      |        |      |      |        |        |      |      |      |        |      |      |      |      |      |      |      |       |      |      |      |      |      |      |      |

| No.       | multiple comparison procedure plot                                                                                                                                                        | RTI details                                                                                                                                                                                                                                                                                                                                                                                                                                                                                                                                                                                                                                                                                                                                                                                                                                                                                                                                                                                                                                                                                                                                                                                                                                                                                                                                                                                                                                                                                                                                                                                                                                                                                                                                                                                                                                                                                                                                                                                                                                                                                                                                                                                                                                                                                        |           |                                    |                  |                    |           |          |                    |     |       |      |      |        |        |      |      |      |       |      |      |      |      |      |      |      |       |      |       |        |        |      |      |      |        |      |      |      |      |      |      |      |        |   |       |        |        |      |     |   |        |      |      |        |        |      |      |      |       |      |       |        |        |      |      |      |       |      |      |      |      |      |      |      |        |      |       |        |        |      |      |      |        |      |      |      |      |      |      |      |        |      |      |      |      |      |      |      |       |      |      |      |      |      |      |      |
|-----------|-------------------------------------------------------------------------------------------------------------------------------------------------------------------------------------------|----------------------------------------------------------------------------------------------------------------------------------------------------------------------------------------------------------------------------------------------------------------------------------------------------------------------------------------------------------------------------------------------------------------------------------------------------------------------------------------------------------------------------------------------------------------------------------------------------------------------------------------------------------------------------------------------------------------------------------------------------------------------------------------------------------------------------------------------------------------------------------------------------------------------------------------------------------------------------------------------------------------------------------------------------------------------------------------------------------------------------------------------------------------------------------------------------------------------------------------------------------------------------------------------------------------------------------------------------------------------------------------------------------------------------------------------------------------------------------------------------------------------------------------------------------------------------------------------------------------------------------------------------------------------------------------------------------------------------------------------------------------------------------------------------------------------------------------------------------------------------------------------------------------------------------------------------------------------------------------------------------------------------------------------------------------------------------------------------------------------------------------------------------------------------------------------------------------------------------------------------------------------------------------------------|-----------|------------------------------------|------------------|--------------------|-----------|----------|--------------------|-----|-------|------|------|--------|--------|------|------|------|-------|------|------|------|------|------|------|------|-------|------|-------|--------|--------|------|------|------|--------|------|------|------|------|------|------|------|--------|---|-------|--------|--------|------|-----|---|--------|------|------|--------|--------|------|------|------|-------|------|-------|--------|--------|------|------|------|-------|------|------|------|------|------|------|------|--------|------|-------|--------|--------|------|------|------|--------|------|------|------|------|------|------|------|--------|------|------|------|------|------|------|------|-------|------|------|------|------|------|------|------|
| (14)      | <p style="text-align: center;"><b>Comparison of Exp. RTI values: Tributylphosphate</b></p> <p style="text-align: center;">No groups have means significantly different from Lab 04</p>    | <table border="1"> <thead> <tr> <th>Institute</th> <th>Level of identification confidence</th> <th>Exp. <math>t_R</math> (min)</th> <th>Exp. RTI</th> <th>Pred. RTI</th> <th>ESI mode</th> <th>Application domain</th> <th>MCP</th> </tr> </thead> <tbody> <tr><td>Lab 6</td><td>N.D.</td><td>N.D.</td><td>N.D.</td><td>N.D.</td><td>N.D.</td><td>N.D.</td><td>N.D.</td></tr> <tr><td>Lab 5</td><td>N.D.</td><td>N.D.</td><td>N.D.</td><td>N.D.</td><td>N.D.</td><td>N.D.</td><td>N.D.</td></tr> <tr><td>Lab 4</td><td>1</td><td>13.81</td><td>774.28</td><td>800.96</td><td>+ESI</td><td>AD1</td><td>a</td></tr> <tr><td>Lab 12</td><td>N.D.</td><td>N.D.</td><td>N.D.</td><td>N.D.</td><td>N.D.</td><td>N.D.</td><td>N.D.</td></tr> <tr><td>Lab 13</td><td>3</td><td>20.51</td><td>770.25</td><td>800.96</td><td>+ESI</td><td>AD1</td><td>a</td></tr> <tr><td>Lab 15</td><td>1</td><td>9.67</td><td>801.82</td><td>800.96</td><td>+ESI</td><td>AD1</td><td>a</td></tr> <tr><td>Lab 9</td><td>N.D.</td><td>N.D.</td><td>N.D.</td><td>N.D.</td><td>N.D.</td><td>N.D.</td><td>N.D.</td></tr> <tr><td>Lab 2</td><td>N.D.</td><td>N.D.</td><td>N.D.</td><td>N.D.</td><td>N.D.</td><td>N.D.</td><td>N.D.</td></tr> <tr><td>Lab 18</td><td>1</td><td>15.67</td><td>697.81</td><td>800.96</td><td>+ESI</td><td>AD2</td><td>a</td></tr> <tr><td>Lab 17</td><td>N.D.</td><td>N.D.</td><td>N.D.</td><td>N.D.</td><td>N.D.</td><td>N.D.</td><td>N.D.</td></tr> <tr><td>Lab 10</td><td>N.D.</td><td>N.D.</td><td>N.D.</td><td>N.D.</td><td>N.D.</td><td>N.D.</td><td>N.D.</td></tr> <tr><td>Lab 7</td><td>N.D.</td><td>N.D.</td><td>N.D.</td><td>N.D.</td><td>N.D.</td><td>N.D.</td><td>N.D.</td></tr> </tbody> </table> <p>AD1: Exp. &amp; Pred. <math>t_R</math> are accepted for this candidate (box1)<br/> AD2: Although there is error, exp. &amp; pred. <math>t_R</math> are accepted for this candidate (box2)<br/> N.D.: Not detected.<br/> All institutes have acceptable exp. RTI values and the difference is <b>not significant at 99% CIs</b> of the calibration curve. <b>Promote “Lab 13” to level 2!</b></p>                                                                                                                                                                                  | Institute | Level of identification confidence | Exp. $t_R$ (min) | Exp. RTI           | Pred. RTI | ESI mode | Application domain | MCP | Lab 6 | N.D. | N.D. | N.D.   | N.D.   | N.D. | N.D. | N.D. | Lab 5 | N.D. | N.D. | N.D. | N.D. | N.D. | N.D. | N.D. | Lab 4 | 1    | 13.81 | 774.28 | 800.96 | +ESI | AD1  | a    | Lab 12 | N.D. | N.D. | N.D. | N.D. | N.D. | N.D. | N.D. | Lab 13 | 3 | 20.51 | 770.25 | 800.96 | +ESI | AD1 | a | Lab 15 | 1    | 9.67 | 801.82 | 800.96 | +ESI | AD1  | a    | Lab 9 | N.D. | N.D.  | N.D.   | N.D.   | N.D. | N.D. | N.D. | Lab 2 | N.D. | N.D. | N.D. | N.D. | N.D. | N.D. | N.D. | Lab 18 | 1    | 15.67 | 697.81 | 800.96 | +ESI | AD2  | a    | Lab 17 | N.D. | N.D. | N.D. | N.D. | N.D. | N.D. | N.D. | Lab 10 | N.D. | N.D. | N.D. | N.D. | N.D. | N.D. | N.D. | Lab 7 | N.D. | N.D. | N.D. | N.D. | N.D. | N.D. | N.D. |
| Institute | Level of identification confidence                                                                                                                                                        | Exp. $t_R$ (min)                                                                                                                                                                                                                                                                                                                                                                                                                                                                                                                                                                                                                                                                                                                                                                                                                                                                                                                                                                                                                                                                                                                                                                                                                                                                                                                                                                                                                                                                                                                                                                                                                                                                                                                                                                                                                                                                                                                                                                                                                                                                                                                                                                                                                                                                                   | Exp. RTI  | Pred. RTI                          | ESI mode         | Application domain | MCP       |          |                    |     |       |      |      |        |        |      |      |      |       |      |      |      |      |      |      |      |       |      |       |        |        |      |      |      |        |      |      |      |      |      |      |      |        |   |       |        |        |      |     |   |        |      |      |        |        |      |      |      |       |      |       |        |        |      |      |      |       |      |      |      |      |      |      |      |        |      |       |        |        |      |      |      |        |      |      |      |      |      |      |      |        |      |      |      |      |      |      |      |       |      |      |      |      |      |      |      |
| Lab 6     | N.D.                                                                                                                                                                                      | N.D.                                                                                                                                                                                                                                                                                                                                                                                                                                                                                                                                                                                                                                                                                                                                                                                                                                                                                                                                                                                                                                                                                                                                                                                                                                                                                                                                                                                                                                                                                                                                                                                                                                                                                                                                                                                                                                                                                                                                                                                                                                                                                                                                                                                                                                                                                               | N.D.      | N.D.                               | N.D.             | N.D.               | N.D.      |          |                    |     |       |      |      |        |        |      |      |      |       |      |      |      |      |      |      |      |       |      |       |        |        |      |      |      |        |      |      |      |      |      |      |      |        |   |       |        |        |      |     |   |        |      |      |        |        |      |      |      |       |      |       |        |        |      |      |      |       |      |      |      |      |      |      |      |        |      |       |        |        |      |      |      |        |      |      |      |      |      |      |      |        |      |      |      |      |      |      |      |       |      |      |      |      |      |      |      |
| Lab 5     | N.D.                                                                                                                                                                                      | N.D.                                                                                                                                                                                                                                                                                                                                                                                                                                                                                                                                                                                                                                                                                                                                                                                                                                                                                                                                                                                                                                                                                                                                                                                                                                                                                                                                                                                                                                                                                                                                                                                                                                                                                                                                                                                                                                                                                                                                                                                                                                                                                                                                                                                                                                                                                               | N.D.      | N.D.                               | N.D.             | N.D.               | N.D.      |          |                    |     |       |      |      |        |        |      |      |      |       |      |      |      |      |      |      |      |       |      |       |        |        |      |      |      |        |      |      |      |      |      |      |      |        |   |       |        |        |      |     |   |        |      |      |        |        |      |      |      |       |      |       |        |        |      |      |      |       |      |      |      |      |      |      |      |        |      |       |        |        |      |      |      |        |      |      |      |      |      |      |      |        |      |      |      |      |      |      |      |       |      |      |      |      |      |      |      |
| Lab 4     | 1                                                                                                                                                                                         | 13.81                                                                                                                                                                                                                                                                                                                                                                                                                                                                                                                                                                                                                                                                                                                                                                                                                                                                                                                                                                                                                                                                                                                                                                                                                                                                                                                                                                                                                                                                                                                                                                                                                                                                                                                                                                                                                                                                                                                                                                                                                                                                                                                                                                                                                                                                                              | 774.28    | 800.96                             | +ESI             | AD1                | a         |          |                    |     |       |      |      |        |        |      |      |      |       |      |      |      |      |      |      |      |       |      |       |        |        |      |      |      |        |      |      |      |      |      |      |      |        |   |       |        |        |      |     |   |        |      |      |        |        |      |      |      |       |      |       |        |        |      |      |      |       |      |      |      |      |      |      |      |        |      |       |        |        |      |      |      |        |      |      |      |      |      |      |      |        |      |      |      |      |      |      |      |       |      |      |      |      |      |      |      |
| Lab 12    | N.D.                                                                                                                                                                                      | N.D.                                                                                                                                                                                                                                                                                                                                                                                                                                                                                                                                                                                                                                                                                                                                                                                                                                                                                                                                                                                                                                                                                                                                                                                                                                                                                                                                                                                                                                                                                                                                                                                                                                                                                                                                                                                                                                                                                                                                                                                                                                                                                                                                                                                                                                                                                               | N.D.      | N.D.                               | N.D.             | N.D.               | N.D.      |          |                    |     |       |      |      |        |        |      |      |      |       |      |      |      |      |      |      |      |       |      |       |        |        |      |      |      |        |      |      |      |      |      |      |      |        |   |       |        |        |      |     |   |        |      |      |        |        |      |      |      |       |      |       |        |        |      |      |      |       |      |      |      |      |      |      |      |        |      |       |        |        |      |      |      |        |      |      |      |      |      |      |      |        |      |      |      |      |      |      |      |       |      |      |      |      |      |      |      |
| Lab 13    | 3                                                                                                                                                                                         | 20.51                                                                                                                                                                                                                                                                                                                                                                                                                                                                                                                                                                                                                                                                                                                                                                                                                                                                                                                                                                                                                                                                                                                                                                                                                                                                                                                                                                                                                                                                                                                                                                                                                                                                                                                                                                                                                                                                                                                                                                                                                                                                                                                                                                                                                                                                                              | 770.25    | 800.96                             | +ESI             | AD1                | a         |          |                    |     |       |      |      |        |        |      |      |      |       |      |      |      |      |      |      |      |       |      |       |        |        |      |      |      |        |      |      |      |      |      |      |      |        |   |       |        |        |      |     |   |        |      |      |        |        |      |      |      |       |      |       |        |        |      |      |      |       |      |      |      |      |      |      |      |        |      |       |        |        |      |      |      |        |      |      |      |      |      |      |      |        |      |      |      |      |      |      |      |       |      |      |      |      |      |      |      |
| Lab 15    | 1                                                                                                                                                                                         | 9.67                                                                                                                                                                                                                                                                                                                                                                                                                                                                                                                                                                                                                                                                                                                                                                                                                                                                                                                                                                                                                                                                                                                                                                                                                                                                                                                                                                                                                                                                                                                                                                                                                                                                                                                                                                                                                                                                                                                                                                                                                                                                                                                                                                                                                                                                                               | 801.82    | 800.96                             | +ESI             | AD1                | a         |          |                    |     |       |      |      |        |        |      |      |      |       |      |      |      |      |      |      |      |       |      |       |        |        |      |      |      |        |      |      |      |      |      |      |      |        |   |       |        |        |      |     |   |        |      |      |        |        |      |      |      |       |      |       |        |        |      |      |      |       |      |      |      |      |      |      |      |        |      |       |        |        |      |      |      |        |      |      |      |      |      |      |      |        |      |      |      |      |      |      |      |       |      |      |      |      |      |      |      |
| Lab 9     | N.D.                                                                                                                                                                                      | N.D.                                                                                                                                                                                                                                                                                                                                                                                                                                                                                                                                                                                                                                                                                                                                                                                                                                                                                                                                                                                                                                                                                                                                                                                                                                                                                                                                                                                                                                                                                                                                                                                                                                                                                                                                                                                                                                                                                                                                                                                                                                                                                                                                                                                                                                                                                               | N.D.      | N.D.                               | N.D.             | N.D.               | N.D.      |          |                    |     |       |      |      |        |        |      |      |      |       |      |      |      |      |      |      |      |       |      |       |        |        |      |      |      |        |      |      |      |      |      |      |      |        |   |       |        |        |      |     |   |        |      |      |        |        |      |      |      |       |      |       |        |        |      |      |      |       |      |      |      |      |      |      |      |        |      |       |        |        |      |      |      |        |      |      |      |      |      |      |      |        |      |      |      |      |      |      |      |       |      |      |      |      |      |      |      |
| Lab 2     | N.D.                                                                                                                                                                                      | N.D.                                                                                                                                                                                                                                                                                                                                                                                                                                                                                                                                                                                                                                                                                                                                                                                                                                                                                                                                                                                                                                                                                                                                                                                                                                                                                                                                                                                                                                                                                                                                                                                                                                                                                                                                                                                                                                                                                                                                                                                                                                                                                                                                                                                                                                                                                               | N.D.      | N.D.                               | N.D.             | N.D.               | N.D.      |          |                    |     |       |      |      |        |        |      |      |      |       |      |      |      |      |      |      |      |       |      |       |        |        |      |      |      |        |      |      |      |      |      |      |      |        |   |       |        |        |      |     |   |        |      |      |        |        |      |      |      |       |      |       |        |        |      |      |      |       |      |      |      |      |      |      |      |        |      |       |        |        |      |      |      |        |      |      |      |      |      |      |      |        |      |      |      |      |      |      |      |       |      |      |      |      |      |      |      |
| Lab 18    | 1                                                                                                                                                                                         | 15.67                                                                                                                                                                                                                                                                                                                                                                                                                                                                                                                                                                                                                                                                                                                                                                                                                                                                                                                                                                                                                                                                                                                                                                                                                                                                                                                                                                                                                                                                                                                                                                                                                                                                                                                                                                                                                                                                                                                                                                                                                                                                                                                                                                                                                                                                                              | 697.81    | 800.96                             | +ESI             | AD2                | a         |          |                    |     |       |      |      |        |        |      |      |      |       |      |      |      |      |      |      |      |       |      |       |        |        |      |      |      |        |      |      |      |      |      |      |      |        |   |       |        |        |      |     |   |        |      |      |        |        |      |      |      |       |      |       |        |        |      |      |      |       |      |      |      |      |      |      |      |        |      |       |        |        |      |      |      |        |      |      |      |      |      |      |      |        |      |      |      |      |      |      |      |       |      |      |      |      |      |      |      |
| Lab 17    | N.D.                                                                                                                                                                                      | N.D.                                                                                                                                                                                                                                                                                                                                                                                                                                                                                                                                                                                                                                                                                                                                                                                                                                                                                                                                                                                                                                                                                                                                                                                                                                                                                                                                                                                                                                                                                                                                                                                                                                                                                                                                                                                                                                                                                                                                                                                                                                                                                                                                                                                                                                                                                               | N.D.      | N.D.                               | N.D.             | N.D.               | N.D.      |          |                    |     |       |      |      |        |        |      |      |      |       |      |      |      |      |      |      |      |       |      |       |        |        |      |      |      |        |      |      |      |      |      |      |      |        |   |       |        |        |      |     |   |        |      |      |        |        |      |      |      |       |      |       |        |        |      |      |      |       |      |      |      |      |      |      |      |        |      |       |        |        |      |      |      |        |      |      |      |      |      |      |      |        |      |      |      |      |      |      |      |       |      |      |      |      |      |      |      |
| Lab 10    | N.D.                                                                                                                                                                                      | N.D.                                                                                                                                                                                                                                                                                                                                                                                                                                                                                                                                                                                                                                                                                                                                                                                                                                                                                                                                                                                                                                                                                                                                                                                                                                                                                                                                                                                                                                                                                                                                                                                                                                                                                                                                                                                                                                                                                                                                                                                                                                                                                                                                                                                                                                                                                               | N.D.      | N.D.                               | N.D.             | N.D.               | N.D.      |          |                    |     |       |      |      |        |        |      |      |      |       |      |      |      |      |      |      |      |       |      |       |        |        |      |      |      |        |      |      |      |      |      |      |      |        |   |       |        |        |      |     |   |        |      |      |        |        |      |      |      |       |      |       |        |        |      |      |      |       |      |      |      |      |      |      |      |        |      |       |        |        |      |      |      |        |      |      |      |      |      |      |      |        |      |      |      |      |      |      |      |       |      |      |      |      |      |      |      |
| Lab 7     | N.D.                                                                                                                                                                                      | N.D.                                                                                                                                                                                                                                                                                                                                                                                                                                                                                                                                                                                                                                                                                                                                                                                                                                                                                                                                                                                                                                                                                                                                                                                                                                                                                                                                                                                                                                                                                                                                                                                                                                                                                                                                                                                                                                                                                                                                                                                                                                                                                                                                                                                                                                                                                               | N.D.      | N.D.                               | N.D.             | N.D.               | N.D.      |          |                    |     |       |      |      |        |        |      |      |      |       |      |      |      |      |      |      |      |       |      |       |        |        |      |      |      |        |      |      |      |      |      |      |      |        |   |       |        |        |      |     |   |        |      |      |        |        |      |      |      |       |      |       |        |        |      |      |      |       |      |      |      |      |      |      |      |        |      |       |        |        |      |      |      |        |      |      |      |      |      |      |      |        |      |      |      |      |      |      |      |       |      |      |      |      |      |      |      |
| (15)      | <p style="text-align: center;"><b>Comparison of Exp. RTI values: Bisphenol A</b></p> <p style="text-align: center;">The means of groups Lab 06 and Lab 13 are significantly different</p> | <table border="1"> <thead> <tr> <th>Institute</th> <th>Level of identification confidence</th> <th>Exp. <math>t_R</math> (min)</th> <th>Exp. RTI</th> <th>Pred. RTI</th> <th>ESI mode</th> <th>Application domain</th> <th>MCP</th> </tr> </thead> <tbody> <tr><td>Lab 6</td><td>1</td><td>8.42</td><td>543.50</td><td>679.28</td><td>+ESI</td><td>AD1</td><td>a</td></tr> <tr><td>Lab 5</td><td>N.D.</td><td>N.D.</td><td>N.D.</td><td>N.D.</td><td>N.D.</td><td>N.D.</td><td>N.D.</td></tr> <tr><td>Lab 4</td><td>N.D.</td><td>N.D.</td><td>N.D.</td><td>N.D.</td><td>N.D.</td><td>N.D.</td><td>N.D.</td></tr> <tr><td>Lab 12</td><td>N.D.</td><td>N.D.</td><td>N.D.</td><td>N.D.</td><td>N.D.</td><td>N.D.</td><td>N.D.</td></tr> <tr><td>Lab 13</td><td>4</td><td>8.33</td><td>304.97</td><td>679.28</td><td>+ESI</td><td>AD4</td><td>b</td></tr> <tr><td>Lab 15</td><td>N.D.</td><td>N.D.</td><td>N.D.</td><td>N.D.</td><td>N.D.</td><td>N.D.</td><td>N.D.</td></tr> <tr><td>Lab 9</td><td>1</td><td>11.65</td><td>626.76</td><td>679.28</td><td>+ESI</td><td>AD1</td><td>a</td></tr> <tr><td>Lab 2</td><td>N.D.</td><td>N.D.</td><td>N.D.</td><td>N.D.</td><td>N.D.</td><td>N.D.</td><td>N.D.</td></tr> <tr><td>Lab 18</td><td>N.D.</td><td>N.D.</td><td>N.D.</td><td>N.D.</td><td>N.D.</td><td>N.D.</td><td>N.D.</td></tr> <tr><td>Lab 17</td><td>N.D.</td><td>N.D.</td><td>N.D.</td><td>N.D.</td><td>N.D.</td><td>N.D.</td><td>N.D.</td></tr> <tr><td>Lab 10</td><td>N.D.</td><td>N.D.</td><td>N.D.</td><td>N.D.</td><td>N.D.</td><td>N.D.</td><td>N.D.</td></tr> <tr><td>Lab 7</td><td>N.D.</td><td>N.D.</td><td>N.D.</td><td>N.D.</td><td>N.D.</td><td>N.D.</td><td>N.D.</td></tr> </tbody> </table> <p>AD1: Exp. &amp; Pred. <math>t_R</math> are accepted for this candidate (box1)<br/> AD4: Pred./Exp. <math>t_R</math> are not reliable (Outside the applicability domain and high SR; use other verification tools (box4))<br/> N.D.: Not detected.<br/> All institutes have acceptable exp. RTI values and the difference is <b>not significant at 99% CIs</b> of the calibration curve with the exception of “Antwerp”. <b>Don’t increase the level of identification confidence from 4 to 2 for this compound in “Lab 13” data! (It is most probably a false positive).</b></p> | Institute | Level of identification confidence | Exp. $t_R$ (min) | Exp. RTI           | Pred. RTI | ESI mode | Application domain | MCP | Lab 6 | 1    | 8.42 | 543.50 | 679.28 | +ESI | AD1  | a    | Lab 5 | N.D. | N.D. | N.D. | N.D. | N.D. | N.D. | N.D. | Lab 4 | N.D. | N.D.  | N.D.   | N.D.   | N.D. | N.D. | N.D. | Lab 12 | N.D. | N.D. | N.D. | N.D. | N.D. | N.D. | N.D. | Lab 13 | 4 | 8.33  | 304.97 | 679.28 | +ESI | AD4 | b | Lab 15 | N.D. | N.D. | N.D.   | N.D.   | N.D. | N.D. | N.D. | Lab 9 | 1    | 11.65 | 626.76 | 679.28 | +ESI | AD1  | a    | Lab 2 | N.D. | N.D. | N.D. | N.D. | N.D. | N.D. | N.D. | Lab 18 | N.D. | N.D.  | N.D.   | N.D.   | N.D. | N.D. | N.D. | Lab 17 | N.D. | N.D. | N.D. | N.D. | N.D. | N.D. | N.D. | Lab 10 | N.D. | N.D. | N.D. | N.D. | N.D. | N.D. | N.D. | Lab 7 | N.D. | N.D. | N.D. | N.D. | N.D. | N.D. | N.D. |
| Institute | Level of identification confidence                                                                                                                                                        | Exp. $t_R$ (min)                                                                                                                                                                                                                                                                                                                                                                                                                                                                                                                                                                                                                                                                                                                                                                                                                                                                                                                                                                                                                                                                                                                                                                                                                                                                                                                                                                                                                                                                                                                                                                                                                                                                                                                                                                                                                                                                                                                                                                                                                                                                                                                                                                                                                                                                                   | Exp. RTI  | Pred. RTI                          | ESI mode         | Application domain | MCP       |          |                    |     |       |      |      |        |        |      |      |      |       |      |      |      |      |      |      |      |       |      |       |        |        |      |      |      |        |      |      |      |      |      |      |      |        |   |       |        |        |      |     |   |        |      |      |        |        |      |      |      |       |      |       |        |        |      |      |      |       |      |      |      |      |      |      |      |        |      |       |        |        |      |      |      |        |      |      |      |      |      |      |      |        |      |      |      |      |      |      |      |       |      |      |      |      |      |      |      |
| Lab 6     | 1                                                                                                                                                                                         | 8.42                                                                                                                                                                                                                                                                                                                                                                                                                                                                                                                                                                                                                                                                                                                                                                                                                                                                                                                                                                                                                                                                                                                                                                                                                                                                                                                                                                                                                                                                                                                                                                                                                                                                                                                                                                                                                                                                                                                                                                                                                                                                                                                                                                                                                                                                                               | 543.50    | 679.28                             | +ESI             | AD1                | a         |          |                    |     |       |      |      |        |        |      |      |      |       |      |      |      |      |      |      |      |       |      |       |        |        |      |      |      |        |      |      |      |      |      |      |      |        |   |       |        |        |      |     |   |        |      |      |        |        |      |      |      |       |      |       |        |        |      |      |      |       |      |      |      |      |      |      |      |        |      |       |        |        |      |      |      |        |      |      |      |      |      |      |      |        |      |      |      |      |      |      |      |       |      |      |      |      |      |      |      |
| Lab 5     | N.D.                                                                                                                                                                                      | N.D.                                                                                                                                                                                                                                                                                                                                                                                                                                                                                                                                                                                                                                                                                                                                                                                                                                                                                                                                                                                                                                                                                                                                                                                                                                                                                                                                                                                                                                                                                                                                                                                                                                                                                                                                                                                                                                                                                                                                                                                                                                                                                                                                                                                                                                                                                               | N.D.      | N.D.                               | N.D.             | N.D.               | N.D.      |          |                    |     |       |      |      |        |        |      |      |      |       |      |      |      |      |      |      |      |       |      |       |        |        |      |      |      |        |      |      |      |      |      |      |      |        |   |       |        |        |      |     |   |        |      |      |        |        |      |      |      |       |      |       |        |        |      |      |      |       |      |      |      |      |      |      |      |        |      |       |        |        |      |      |      |        |      |      |      |      |      |      |      |        |      |      |      |      |      |      |      |       |      |      |      |      |      |      |      |
| Lab 4     | N.D.                                                                                                                                                                                      | N.D.                                                                                                                                                                                                                                                                                                                                                                                                                                                                                                                                                                                                                                                                                                                                                                                                                                                                                                                                                                                                                                                                                                                                                                                                                                                                                                                                                                                                                                                                                                                                                                                                                                                                                                                                                                                                                                                                                                                                                                                                                                                                                                                                                                                                                                                                                               | N.D.      | N.D.                               | N.D.             | N.D.               | N.D.      |          |                    |     |       |      |      |        |        |      |      |      |       |      |      |      |      |      |      |      |       |      |       |        |        |      |      |      |        |      |      |      |      |      |      |      |        |   |       |        |        |      |     |   |        |      |      |        |        |      |      |      |       |      |       |        |        |      |      |      |       |      |      |      |      |      |      |      |        |      |       |        |        |      |      |      |        |      |      |      |      |      |      |      |        |      |      |      |      |      |      |      |       |      |      |      |      |      |      |      |
| Lab 12    | N.D.                                                                                                                                                                                      | N.D.                                                                                                                                                                                                                                                                                                                                                                                                                                                                                                                                                                                                                                                                                                                                                                                                                                                                                                                                                                                                                                                                                                                                                                                                                                                                                                                                                                                                                                                                                                                                                                                                                                                                                                                                                                                                                                                                                                                                                                                                                                                                                                                                                                                                                                                                                               | N.D.      | N.D.                               | N.D.             | N.D.               | N.D.      |          |                    |     |       |      |      |        |        |      |      |      |       |      |      |      |      |      |      |      |       |      |       |        |        |      |      |      |        |      |      |      |      |      |      |      |        |   |       |        |        |      |     |   |        |      |      |        |        |      |      |      |       |      |       |        |        |      |      |      |       |      |      |      |      |      |      |      |        |      |       |        |        |      |      |      |        |      |      |      |      |      |      |      |        |      |      |      |      |      |      |      |       |      |      |      |      |      |      |      |
| Lab 13    | 4                                                                                                                                                                                         | 8.33                                                                                                                                                                                                                                                                                                                                                                                                                                                                                                                                                                                                                                                                                                                                                                                                                                                                                                                                                                                                                                                                                                                                                                                                                                                                                                                                                                                                                                                                                                                                                                                                                                                                                                                                                                                                                                                                                                                                                                                                                                                                                                                                                                                                                                                                                               | 304.97    | 679.28                             | +ESI             | AD4                | b         |          |                    |     |       |      |      |        |        |      |      |      |       |      |      |      |      |      |      |      |       |      |       |        |        |      |      |      |        |      |      |      |      |      |      |      |        |   |       |        |        |      |     |   |        |      |      |        |        |      |      |      |       |      |       |        |        |      |      |      |       |      |      |      |      |      |      |      |        |      |       |        |        |      |      |      |        |      |      |      |      |      |      |      |        |      |      |      |      |      |      |      |       |      |      |      |      |      |      |      |
| Lab 15    | N.D.                                                                                                                                                                                      | N.D.                                                                                                                                                                                                                                                                                                                                                                                                                                                                                                                                                                                                                                                                                                                                                                                                                                                                                                                                                                                                                                                                                                                                                                                                                                                                                                                                                                                                                                                                                                                                                                                                                                                                                                                                                                                                                                                                                                                                                                                                                                                                                                                                                                                                                                                                                               | N.D.      | N.D.                               | N.D.             | N.D.               | N.D.      |          |                    |     |       |      |      |        |        |      |      |      |       |      |      |      |      |      |      |      |       |      |       |        |        |      |      |      |        |      |      |      |      |      |      |      |        |   |       |        |        |      |     |   |        |      |      |        |        |      |      |      |       |      |       |        |        |      |      |      |       |      |      |      |      |      |      |      |        |      |       |        |        |      |      |      |        |      |      |      |      |      |      |      |        |      |      |      |      |      |      |      |       |      |      |      |      |      |      |      |
| Lab 9     | 1                                                                                                                                                                                         | 11.65                                                                                                                                                                                                                                                                                                                                                                                                                                                                                                                                                                                                                                                                                                                                                                                                                                                                                                                                                                                                                                                                                                                                                                                                                                                                                                                                                                                                                                                                                                                                                                                                                                                                                                                                                                                                                                                                                                                                                                                                                                                                                                                                                                                                                                                                                              | 626.76    | 679.28                             | +ESI             | AD1                | a         |          |                    |     |       |      |      |        |        |      |      |      |       |      |      |      |      |      |      |      |       |      |       |        |        |      |      |      |        |      |      |      |      |      |      |      |        |   |       |        |        |      |     |   |        |      |      |        |        |      |      |      |       |      |       |        |        |      |      |      |       |      |      |      |      |      |      |      |        |      |       |        |        |      |      |      |        |      |      |      |      |      |      |      |        |      |      |      |      |      |      |      |       |      |      |      |      |      |      |      |
| Lab 2     | N.D.                                                                                                                                                                                      | N.D.                                                                                                                                                                                                                                                                                                                                                                                                                                                                                                                                                                                                                                                                                                                                                                                                                                                                                                                                                                                                                                                                                                                                                                                                                                                                                                                                                                                                                                                                                                                                                                                                                                                                                                                                                                                                                                                                                                                                                                                                                                                                                                                                                                                                                                                                                               | N.D.      | N.D.                               | N.D.             | N.D.               | N.D.      |          |                    |     |       |      |      |        |        |      |      |      |       |      |      |      |      |      |      |      |       |      |       |        |        |      |      |      |        |      |      |      |      |      |      |      |        |   |       |        |        |      |     |   |        |      |      |        |        |      |      |      |       |      |       |        |        |      |      |      |       |      |      |      |      |      |      |      |        |      |       |        |        |      |      |      |        |      |      |      |      |      |      |      |        |      |      |      |      |      |      |      |       |      |      |      |      |      |      |      |
| Lab 18    | N.D.                                                                                                                                                                                      | N.D.                                                                                                                                                                                                                                                                                                                                                                                                                                                                                                                                                                                                                                                                                                                                                                                                                                                                                                                                                                                                                                                                                                                                                                                                                                                                                                                                                                                                                                                                                                                                                                                                                                                                                                                                                                                                                                                                                                                                                                                                                                                                                                                                                                                                                                                                                               | N.D.      | N.D.                               | N.D.             | N.D.               | N.D.      |          |                    |     |       |      |      |        |        |      |      |      |       |      |      |      |      |      |      |      |       |      |       |        |        |      |      |      |        |      |      |      |      |      |      |      |        |   |       |        |        |      |     |   |        |      |      |        |        |      |      |      |       |      |       |        |        |      |      |      |       |      |      |      |      |      |      |      |        |      |       |        |        |      |      |      |        |      |      |      |      |      |      |      |        |      |      |      |      |      |      |      |       |      |      |      |      |      |      |      |
| Lab 17    | N.D.                                                                                                                                                                                      | N.D.                                                                                                                                                                                                                                                                                                                                                                                                                                                                                                                                                                                                                                                                                                                                                                                                                                                                                                                                                                                                                                                                                                                                                                                                                                                                                                                                                                                                                                                                                                                                                                                                                                                                                                                                                                                                                                                                                                                                                                                                                                                                                                                                                                                                                                                                                               | N.D.      | N.D.                               | N.D.             | N.D.               | N.D.      |          |                    |     |       |      |      |        |        |      |      |      |       |      |      |      |      |      |      |      |       |      |       |        |        |      |      |      |        |      |      |      |      |      |      |      |        |   |       |        |        |      |     |   |        |      |      |        |        |      |      |      |       |      |       |        |        |      |      |      |       |      |      |      |      |      |      |      |        |      |       |        |        |      |      |      |        |      |      |      |      |      |      |      |        |      |      |      |      |      |      |      |       |      |      |      |      |      |      |      |
| Lab 10    | N.D.                                                                                                                                                                                      | N.D.                                                                                                                                                                                                                                                                                                                                                                                                                                                                                                                                                                                                                                                                                                                                                                                                                                                                                                                                                                                                                                                                                                                                                                                                                                                                                                                                                                                                                                                                                                                                                                                                                                                                                                                                                                                                                                                                                                                                                                                                                                                                                                                                                                                                                                                                                               | N.D.      | N.D.                               | N.D.             | N.D.               | N.D.      |          |                    |     |       |      |      |        |        |      |      |      |       |      |      |      |      |      |      |      |       |      |       |        |        |      |      |      |        |      |      |      |      |      |      |      |        |   |       |        |        |      |     |   |        |      |      |        |        |      |      |      |       |      |       |        |        |      |      |      |       |      |      |      |      |      |      |      |        |      |       |        |        |      |      |      |        |      |      |      |      |      |      |      |        |      |      |      |      |      |      |      |       |      |      |      |      |      |      |      |
| Lab 7     | N.D.                                                                                                                                                                                      | N.D.                                                                                                                                                                                                                                                                                                                                                                                                                                                                                                                                                                                                                                                                                                                                                                                                                                                                                                                                                                                                                                                                                                                                                                                                                                                                                                                                                                                                                                                                                                                                                                                                                                                                                                                                                                                                                                                                                                                                                                                                                                                                                                                                                                                                                                                                                               | N.D.      | N.D.                               | N.D.             | N.D.               | N.D.      |          |                    |     |       |      |      |        |        |      |      |      |       |      |      |      |      |      |      |      |       |      |       |        |        |      |      |      |        |      |      |      |      |      |      |      |        |   |       |        |        |      |     |   |        |      |      |        |        |      |      |      |       |      |       |        |        |      |      |      |       |      |      |      |      |      |      |      |        |      |       |        |        |      |      |      |        |      |      |      |      |      |      |      |        |      |      |      |      |      |      |      |       |      |      |      |      |      |      |      |

| No.    | multiple comparison procedure plot                                                                                                                                                                                                                                                | RTI details                                                                                                                                                                                                                                                                                                                                                                                                                                                                                                                                                                                                                                                                                                                                                                                                                                                                                                                                                                                                                                                                                                                                                                                                                                                                                                                                                                                                                                                                                                                                                                                                                                                                                                                                                                                                                                                                                                                                                                                                                                                                                                                                                         |                                                                                                                                                                                                                                                                                                                                                                                                                                                                                                                                                                                                                                                                                                                                                                                                                                                                                                                                                                                                                                                                                                                                                                                                                                                                                                                                                                                                                                                                                                                                                                                                                                                                                                                                                                                                                                                                                                                                                                                                                                                          |                                    |                                    |                           |                    |                    |                    |                    |       |       |      |      |      |      |      |      |       |       |      |      |      |      |      |      |       |       |      |       |        |        |      |      |        |        |       |         |         |        |      |     |        |        |      |      |      |      |      |      |        |        |       |        |         |      |      |      |       |       |      |       |         |        |      |      |       |       |       |         |         |      |      |      |        |        |       |         |         |      |      |      |        |        |      |      |      |      |      |      |        |        |      |      |      |      |      |      |       |       |       |        |         |      |      |      |      |
|--------|-----------------------------------------------------------------------------------------------------------------------------------------------------------------------------------------------------------------------------------------------------------------------------------|---------------------------------------------------------------------------------------------------------------------------------------------------------------------------------------------------------------------------------------------------------------------------------------------------------------------------------------------------------------------------------------------------------------------------------------------------------------------------------------------------------------------------------------------------------------------------------------------------------------------------------------------------------------------------------------------------------------------------------------------------------------------------------------------------------------------------------------------------------------------------------------------------------------------------------------------------------------------------------------------------------------------------------------------------------------------------------------------------------------------------------------------------------------------------------------------------------------------------------------------------------------------------------------------------------------------------------------------------------------------------------------------------------------------------------------------------------------------------------------------------------------------------------------------------------------------------------------------------------------------------------------------------------------------------------------------------------------------------------------------------------------------------------------------------------------------------------------------------------------------------------------------------------------------------------------------------------------------------------------------------------------------------------------------------------------------------------------------------------------------------------------------------------------------|----------------------------------------------------------------------------------------------------------------------------------------------------------------------------------------------------------------------------------------------------------------------------------------------------------------------------------------------------------------------------------------------------------------------------------------------------------------------------------------------------------------------------------------------------------------------------------------------------------------------------------------------------------------------------------------------------------------------------------------------------------------------------------------------------------------------------------------------------------------------------------------------------------------------------------------------------------------------------------------------------------------------------------------------------------------------------------------------------------------------------------------------------------------------------------------------------------------------------------------------------------------------------------------------------------------------------------------------------------------------------------------------------------------------------------------------------------------------------------------------------------------------------------------------------------------------------------------------------------------------------------------------------------------------------------------------------------------------------------------------------------------------------------------------------------------------------------------------------------------------------------------------------------------------------------------------------------------------------------------------------------------------------------------------------------|------------------------------------|------------------------------------|---------------------------|--------------------|--------------------|--------------------|--------------------|-------|-------|------|------|------|------|------|------|-------|-------|------|------|------|------|------|------|-------|-------|------|-------|--------|--------|------|------|--------|--------|-------|---------|---------|--------|------|-----|--------|--------|------|------|------|------|------|------|--------|--------|-------|--------|---------|------|------|------|-------|-------|------|-------|---------|--------|------|------|-------|-------|-------|---------|---------|------|------|------|--------|--------|-------|---------|---------|------|------|------|--------|--------|------|------|------|------|------|------|--------|--------|------|------|------|------|------|------|-------|-------|-------|--------|---------|------|------|------|------|
| (16)   | <p data-bbox="264 145 990 172"><b>Comparison of Exp. RTI values: Bis(2-ethylhexyl)phthalate</b></p> 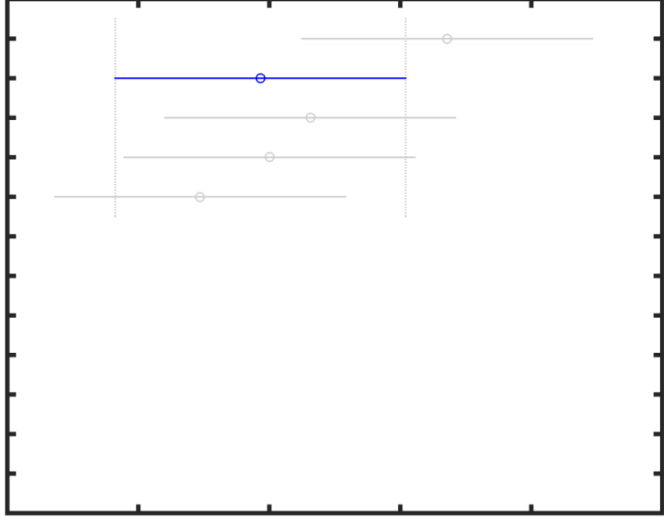 <p data-bbox="271 735 990 762">No groups have means significantly different from Lab 15</p> | <table border="1"> <thead> <tr> <th>Institute</th> <th>Level of identification confidence</th> <th>Exp. tR</th> <th>Exp. RTI</th> <th>Pred. RTI</th> <th>ESI mode</th> <th>Application domain</th> <th>MCP</th> </tr> </thead> <tbody> <tr><td>Lab 6</td><td>N.D.</td><td>N.D.</td><td>N.D.</td><td>N.D.</td><td>N.D.</td><td>N.D.</td><td>N.D.</td></tr> <tr><td>Lab 5</td><td>N.D.</td><td>N.D.</td><td>N.D.</td><td>N.D.</td><td>N.D.</td><td>N.D.</td><td>N.D.</td></tr> <tr><td>Lab 4</td><td>N.D.</td><td>N.D.</td><td>N.D.</td><td>N.D.</td><td>N.D.</td><td>N.D.</td><td>N.D.</td></tr> <tr><td>Lab 12</td><td>2a</td><td>10.78</td><td>1135.81</td><td>1001.82</td><td>+ESI</td><td>AD2</td><td>a</td></tr> <tr><td>Lab 13</td><td>N.D.</td><td>N.D.</td><td>N.D.</td><td>N.D.</td><td>N.D.</td><td>N.D.</td><td>N.D.</td></tr> <tr><td>Lab 15</td><td>1</td><td>11.95</td><td>993.21</td><td>1001.82</td><td>+ESI</td><td>AD1</td><td>a</td></tr> <tr><td>Lab 9</td><td>N.D.</td><td>N.D.</td><td>N.D.</td><td>N.D.</td><td>N.D.</td><td>N.D.</td><td>N.D.</td></tr> <tr><td>Lab 2</td><td>1</td><td>47.30</td><td>1031.22</td><td>1001.82</td><td>+ESI</td><td>AD1</td><td>a</td></tr> <tr><td>Lab 18</td><td>1</td><td>22.28</td><td>1000.21</td><td>1001.82</td><td>+ESI</td><td>AD1</td><td>a</td></tr> <tr><td>Lab 17</td><td>N.D.</td><td>N.D.</td><td>N.D.</td><td>N.D.</td><td>N.D.</td><td>N.D.</td><td>N.D.</td></tr> <tr><td>Lab 10</td><td>N.D.</td><td>N.D.</td><td>N.D.</td><td>N.D.</td><td>N.D.</td><td>N.D.</td><td>N.D.</td></tr> <tr><td>Lab 7</td><td>2</td><td>21.68</td><td>947.27</td><td>1001.82</td><td>+ESI</td><td>AD1</td><td>a</td></tr> </tbody> </table> <p data-bbox="1003 624 1646 651">AD1: Exp. &amp; Pred. tR are accepted for this candidate (box1)</p> <p data-bbox="1003 651 1899 678">AD2: Although there is error, exp. &amp; pred. tR are accepted for this candidate (box2)</p> <p data-bbox="1003 678 1211 705">N.D.: Not detected.</p> <p data-bbox="1003 705 2085 767">All institutes have acceptable exp. RTI values and the difference is <b>not significant at 99% CIs</b> of the calibration curve.</p> | Institute                                                                                                                                                                                                                                                                                                                                                                                                                                                                                                                                                                                                                                                                                                                                                                                                                                                                                                                                                                                                                                                                                                                                                                                                                                                                                                                                                                                                                                                                                                                                                                                                                                                                                                                                                                                                                                                                                                                                                                                                                                                | Level of identification confidence | Exp. tR                            | Exp. RTI                  | Pred. RTI          | ESI mode           | Application domain | MCP                | Lab 6 | N.D.  | N.D. | N.D. | N.D. | N.D. | N.D. | N.D. | Lab 5 | N.D.  | N.D. | N.D. | N.D. | N.D. | N.D. | N.D. | Lab 4 | N.D.  | N.D. | N.D.  | N.D.   | N.D.   | N.D. | N.D. | Lab 12 | 2a     | 10.78 | 1135.81 | 1001.82 | +ESI   | AD2  | a   | Lab 13 | N.D.   | N.D. | N.D. | N.D. | N.D. | N.D. | N.D. | Lab 15 | 1      | 11.95 | 993.21 | 1001.82 | +ESI | AD1  | a    | Lab 9 | N.D.  | N.D. | N.D.  | N.D.    | N.D.   | N.D. | N.D. | Lab 2 | 1     | 47.30 | 1031.22 | 1001.82 | +ESI | AD1  | a    | Lab 18 | 1      | 22.28 | 1000.21 | 1001.82 | +ESI | AD1  | a    | Lab 17 | N.D.   | N.D. | N.D. | N.D. | N.D. | N.D. | N.D. | Lab 10 | N.D.   | N.D. | N.D. | N.D. | N.D. | N.D. | N.D. | Lab 7 | 2     | 21.68 | 947.27 | 1001.82 | +ESI | AD1  | a    |      |
|        | Institute                                                                                                                                                                                                                                                                         | Level of identification confidence                                                                                                                                                                                                                                                                                                                                                                                                                                                                                                                                                                                                                                                                                                                                                                                                                                                                                                                                                                                                                                                                                                                                                                                                                                                                                                                                                                                                                                                                                                                                                                                                                                                                                                                                                                                                                                                                                                                                                                                                                                                                                                                                  | Exp. tR                                                                                                                                                                                                                                                                                                                                                                                                                                                                                                                                                                                                                                                                                                                                                                                                                                                                                                                                                                                                                                                                                                                                                                                                                                                                                                                                                                                                                                                                                                                                                                                                                                                                                                                                                                                                                                                                                                                                                                                                                                                  | Exp. RTI                           | Pred. RTI                          | ESI mode                  | Application domain | MCP                |                    |                    |       |       |      |      |      |      |      |      |       |       |      |      |      |      |      |      |       |       |      |       |        |        |      |      |        |        |       |         |         |        |      |     |        |        |      |      |      |      |      |      |        |        |       |        |         |      |      |      |       |       |      |       |         |        |      |      |       |       |       |         |         |      |      |      |        |        |       |         |         |      |      |      |        |        |      |      |      |      |      |      |        |        |      |      |      |      |      |      |       |       |       |        |         |      |      |      |      |
|        | Lab 6                                                                                                                                                                                                                                                                             | N.D.                                                                                                                                                                                                                                                                                                                                                                                                                                                                                                                                                                                                                                                                                                                                                                                                                                                                                                                                                                                                                                                                                                                                                                                                                                                                                                                                                                                                                                                                                                                                                                                                                                                                                                                                                                                                                                                                                                                                                                                                                                                                                                                                                                | N.D.                                                                                                                                                                                                                                                                                                                                                                                                                                                                                                                                                                                                                                                                                                                                                                                                                                                                                                                                                                                                                                                                                                                                                                                                                                                                                                                                                                                                                                                                                                                                                                                                                                                                                                                                                                                                                                                                                                                                                                                                                                                     | N.D.                               | N.D.                               | N.D.                      | N.D.               | N.D.               |                    |                    |       |       |      |      |      |      |      |      |       |       |      |      |      |      |      |      |       |       |      |       |        |        |      |      |        |        |       |         |         |        |      |     |        |        |      |      |      |      |      |      |        |        |       |        |         |      |      |      |       |       |      |       |         |        |      |      |       |       |       |         |         |      |      |      |        |        |       |         |         |      |      |      |        |        |      |      |      |      |      |      |        |        |      |      |      |      |      |      |       |       |       |        |         |      |      |      |      |
|        | Lab 5                                                                                                                                                                                                                                                                             | N.D.                                                                                                                                                                                                                                                                                                                                                                                                                                                                                                                                                                                                                                                                                                                                                                                                                                                                                                                                                                                                                                                                                                                                                                                                                                                                                                                                                                                                                                                                                                                                                                                                                                                                                                                                                                                                                                                                                                                                                                                                                                                                                                                                                                | N.D.                                                                                                                                                                                                                                                                                                                                                                                                                                                                                                                                                                                                                                                                                                                                                                                                                                                                                                                                                                                                                                                                                                                                                                                                                                                                                                                                                                                                                                                                                                                                                                                                                                                                                                                                                                                                                                                                                                                                                                                                                                                     | N.D.                               | N.D.                               | N.D.                      | N.D.               | N.D.               |                    |                    |       |       |      |      |      |      |      |      |       |       |      |      |      |      |      |      |       |       |      |       |        |        |      |      |        |        |       |         |         |        |      |     |        |        |      |      |      |      |      |      |        |        |       |        |         |      |      |      |       |       |      |       |         |        |      |      |       |       |       |         |         |      |      |      |        |        |       |         |         |      |      |      |        |        |      |      |      |      |      |      |        |        |      |      |      |      |      |      |       |       |       |        |         |      |      |      |      |
|        | Lab 4                                                                                                                                                                                                                                                                             | N.D.                                                                                                                                                                                                                                                                                                                                                                                                                                                                                                                                                                                                                                                                                                                                                                                                                                                                                                                                                                                                                                                                                                                                                                                                                                                                                                                                                                                                                                                                                                                                                                                                                                                                                                                                                                                                                                                                                                                                                                                                                                                                                                                                                                | N.D.                                                                                                                                                                                                                                                                                                                                                                                                                                                                                                                                                                                                                                                                                                                                                                                                                                                                                                                                                                                                                                                                                                                                                                                                                                                                                                                                                                                                                                                                                                                                                                                                                                                                                                                                                                                                                                                                                                                                                                                                                                                     | N.D.                               | N.D.                               | N.D.                      | N.D.               | N.D.               |                    |                    |       |       |      |      |      |      |      |      |       |       |      |      |      |      |      |      |       |       |      |       |        |        |      |      |        |        |       |         |         |        |      |     |        |        |      |      |      |      |      |      |        |        |       |        |         |      |      |      |       |       |      |       |         |        |      |      |       |       |       |         |         |      |      |      |        |        |       |         |         |      |      |      |        |        |      |      |      |      |      |      |        |        |      |      |      |      |      |      |       |       |       |        |         |      |      |      |      |
|        | Lab 12                                                                                                                                                                                                                                                                            | 2a                                                                                                                                                                                                                                                                                                                                                                                                                                                                                                                                                                                                                                                                                                                                                                                                                                                                                                                                                                                                                                                                                                                                                                                                                                                                                                                                                                                                                                                                                                                                                                                                                                                                                                                                                                                                                                                                                                                                                                                                                                                                                                                                                                  | 10.78                                                                                                                                                                                                                                                                                                                                                                                                                                                                                                                                                                                                                                                                                                                                                                                                                                                                                                                                                                                                                                                                                                                                                                                                                                                                                                                                                                                                                                                                                                                                                                                                                                                                                                                                                                                                                                                                                                                                                                                                                                                    | 1135.81                            | 1001.82                            | +ESI                      | AD2                | a                  |                    |                    |       |       |      |      |      |      |      |      |       |       |      |      |      |      |      |      |       |       |      |       |        |        |      |      |        |        |       |         |         |        |      |     |        |        |      |      |      |      |      |      |        |        |       |        |         |      |      |      |       |       |      |       |         |        |      |      |       |       |       |         |         |      |      |      |        |        |       |         |         |      |      |      |        |        |      |      |      |      |      |      |        |        |      |      |      |      |      |      |       |       |       |        |         |      |      |      |      |
|        | Lab 13                                                                                                                                                                                                                                                                            | N.D.                                                                                                                                                                                                                                                                                                                                                                                                                                                                                                                                                                                                                                                                                                                                                                                                                                                                                                                                                                                                                                                                                                                                                                                                                                                                                                                                                                                                                                                                                                                                                                                                                                                                                                                                                                                                                                                                                                                                                                                                                                                                                                                                                                | N.D.                                                                                                                                                                                                                                                                                                                                                                                                                                                                                                                                                                                                                                                                                                                                                                                                                                                                                                                                                                                                                                                                                                                                                                                                                                                                                                                                                                                                                                                                                                                                                                                                                                                                                                                                                                                                                                                                                                                                                                                                                                                     | N.D.                               | N.D.                               | N.D.                      | N.D.               | N.D.               |                    |                    |       |       |      |      |      |      |      |      |       |       |      |      |      |      |      |      |       |       |      |       |        |        |      |      |        |        |       |         |         |        |      |     |        |        |      |      |      |      |      |      |        |        |       |        |         |      |      |      |       |       |      |       |         |        |      |      |       |       |       |         |         |      |      |      |        |        |       |         |         |      |      |      |        |        |      |      |      |      |      |      |        |        |      |      |      |      |      |      |       |       |       |        |         |      |      |      |      |
|        | Lab 15                                                                                                                                                                                                                                                                            | 1                                                                                                                                                                                                                                                                                                                                                                                                                                                                                                                                                                                                                                                                                                                                                                                                                                                                                                                                                                                                                                                                                                                                                                                                                                                                                                                                                                                                                                                                                                                                                                                                                                                                                                                                                                                                                                                                                                                                                                                                                                                                                                                                                                   | 11.95                                                                                                                                                                                                                                                                                                                                                                                                                                                                                                                                                                                                                                                                                                                                                                                                                                                                                                                                                                                                                                                                                                                                                                                                                                                                                                                                                                                                                                                                                                                                                                                                                                                                                                                                                                                                                                                                                                                                                                                                                                                    | 993.21                             | 1001.82                            | +ESI                      | AD1                | a                  |                    |                    |       |       |      |      |      |      |      |      |       |       |      |      |      |      |      |      |       |       |      |       |        |        |      |      |        |        |       |         |         |        |      |     |        |        |      |      |      |      |      |      |        |        |       |        |         |      |      |      |       |       |      |       |         |        |      |      |       |       |       |         |         |      |      |      |        |        |       |         |         |      |      |      |        |        |      |      |      |      |      |      |        |        |      |      |      |      |      |      |       |       |       |        |         |      |      |      |      |
|        | Lab 9                                                                                                                                                                                                                                                                             | N.D.                                                                                                                                                                                                                                                                                                                                                                                                                                                                                                                                                                                                                                                                                                                                                                                                                                                                                                                                                                                                                                                                                                                                                                                                                                                                                                                                                                                                                                                                                                                                                                                                                                                                                                                                                                                                                                                                                                                                                                                                                                                                                                                                                                | N.D.                                                                                                                                                                                                                                                                                                                                                                                                                                                                                                                                                                                                                                                                                                                                                                                                                                                                                                                                                                                                                                                                                                                                                                                                                                                                                                                                                                                                                                                                                                                                                                                                                                                                                                                                                                                                                                                                                                                                                                                                                                                     | N.D.                               | N.D.                               | N.D.                      | N.D.               | N.D.               |                    |                    |       |       |      |      |      |      |      |      |       |       |      |      |      |      |      |      |       |       |      |       |        |        |      |      |        |        |       |         |         |        |      |     |        |        |      |      |      |      |      |      |        |        |       |        |         |      |      |      |       |       |      |       |         |        |      |      |       |       |       |         |         |      |      |      |        |        |       |         |         |      |      |      |        |        |      |      |      |      |      |      |        |        |      |      |      |      |      |      |       |       |       |        |         |      |      |      |      |
|        | Lab 2                                                                                                                                                                                                                                                                             | 1                                                                                                                                                                                                                                                                                                                                                                                                                                                                                                                                                                                                                                                                                                                                                                                                                                                                                                                                                                                                                                                                                                                                                                                                                                                                                                                                                                                                                                                                                                                                                                                                                                                                                                                                                                                                                                                                                                                                                                                                                                                                                                                                                                   | 47.30                                                                                                                                                                                                                                                                                                                                                                                                                                                                                                                                                                                                                                                                                                                                                                                                                                                                                                                                                                                                                                                                                                                                                                                                                                                                                                                                                                                                                                                                                                                                                                                                                                                                                                                                                                                                                                                                                                                                                                                                                                                    | 1031.22                            | 1001.82                            | +ESI                      | AD1                | a                  |                    |                    |       |       |      |      |      |      |      |      |       |       |      |      |      |      |      |      |       |       |      |       |        |        |      |      |        |        |       |         |         |        |      |     |        |        |      |      |      |      |      |      |        |        |       |        |         |      |      |      |       |       |      |       |         |        |      |      |       |       |       |         |         |      |      |      |        |        |       |         |         |      |      |      |        |        |      |      |      |      |      |      |        |        |      |      |      |      |      |      |       |       |       |        |         |      |      |      |      |
|        | Lab 18                                                                                                                                                                                                                                                                            | 1                                                                                                                                                                                                                                                                                                                                                                                                                                                                                                                                                                                                                                                                                                                                                                                                                                                                                                                                                                                                                                                                                                                                                                                                                                                                                                                                                                                                                                                                                                                                                                                                                                                                                                                                                                                                                                                                                                                                                                                                                                                                                                                                                                   | 22.28                                                                                                                                                                                                                                                                                                                                                                                                                                                                                                                                                                                                                                                                                                                                                                                                                                                                                                                                                                                                                                                                                                                                                                                                                                                                                                                                                                                                                                                                                                                                                                                                                                                                                                                                                                                                                                                                                                                                                                                                                                                    | 1000.21                            | 1001.82                            | +ESI                      | AD1                | a                  |                    |                    |       |       |      |      |      |      |      |      |       |       |      |      |      |      |      |      |       |       |      |       |        |        |      |      |        |        |       |         |         |        |      |     |        |        |      |      |      |      |      |      |        |        |       |        |         |      |      |      |       |       |      |       |         |        |      |      |       |       |       |         |         |      |      |      |        |        |       |         |         |      |      |      |        |        |      |      |      |      |      |      |        |        |      |      |      |      |      |      |       |       |       |        |         |      |      |      |      |
|        | Lab 17                                                                                                                                                                                                                                                                            | N.D.                                                                                                                                                                                                                                                                                                                                                                                                                                                                                                                                                                                                                                                                                                                                                                                                                                                                                                                                                                                                                                                                                                                                                                                                                                                                                                                                                                                                                                                                                                                                                                                                                                                                                                                                                                                                                                                                                                                                                                                                                                                                                                                                                                | N.D.                                                                                                                                                                                                                                                                                                                                                                                                                                                                                                                                                                                                                                                                                                                                                                                                                                                                                                                                                                                                                                                                                                                                                                                                                                                                                                                                                                                                                                                                                                                                                                                                                                                                                                                                                                                                                                                                                                                                                                                                                                                     | N.D.                               | N.D.                               | N.D.                      | N.D.               | N.D.               |                    |                    |       |       |      |      |      |      |      |      |       |       |      |      |      |      |      |      |       |       |      |       |        |        |      |      |        |        |       |         |         |        |      |     |        |        |      |      |      |      |      |      |        |        |       |        |         |      |      |      |       |       |      |       |         |        |      |      |       |       |       |         |         |      |      |      |        |        |       |         |         |      |      |      |        |        |      |      |      |      |      |      |        |        |      |      |      |      |      |      |       |       |       |        |         |      |      |      |      |
|        | Lab 10                                                                                                                                                                                                                                                                            | N.D.                                                                                                                                                                                                                                                                                                                                                                                                                                                                                                                                                                                                                                                                                                                                                                                                                                                                                                                                                                                                                                                                                                                                                                                                                                                                                                                                                                                                                                                                                                                                                                                                                                                                                                                                                                                                                                                                                                                                                                                                                                                                                                                                                                | N.D.                                                                                                                                                                                                                                                                                                                                                                                                                                                                                                                                                                                                                                                                                                                                                                                                                                                                                                                                                                                                                                                                                                                                                                                                                                                                                                                                                                                                                                                                                                                                                                                                                                                                                                                                                                                                                                                                                                                                                                                                                                                     | N.D.                               | N.D.                               | N.D.                      | N.D.               | N.D.               |                    |                    |       |       |      |      |      |      |      |      |       |       |      |      |      |      |      |      |       |       |      |       |        |        |      |      |        |        |       |         |         |        |      |     |        |        |      |      |      |      |      |      |        |        |       |        |         |      |      |      |       |       |      |       |         |        |      |      |       |       |       |         |         |      |      |      |        |        |       |         |         |      |      |      |        |        |      |      |      |      |      |      |        |        |      |      |      |      |      |      |       |       |       |        |         |      |      |      |      |
|        | Lab 7                                                                                                                                                                                                                                                                             | 2                                                                                                                                                                                                                                                                                                                                                                                                                                                                                                                                                                                                                                                                                                                                                                                                                                                                                                                                                                                                                                                                                                                                                                                                                                                                                                                                                                                                                                                                                                                                                                                                                                                                                                                                                                                                                                                                                                                                                                                                                                                                                                                                                                   | 21.68                                                                                                                                                                                                                                                                                                                                                                                                                                                                                                                                                                                                                                                                                                                                                                                                                                                                                                                                                                                                                                                                                                                                                                                                                                                                                                                                                                                                                                                                                                                                                                                                                                                                                                                                                                                                                                                                                                                                                                                                                                                    | 947.27                             | 1001.82                            | +ESI                      | AD1                | a                  |                    |                    |       |       |      |      |      |      |      |      |       |       |      |      |      |      |      |      |       |       |      |       |        |        |      |      |        |        |       |         |         |        |      |     |        |        |      |      |      |      |      |      |        |        |       |        |         |      |      |      |       |       |      |       |         |        |      |      |       |       |       |         |         |      |      |      |        |        |       |         |         |      |      |      |        |        |      |      |      |      |      |      |        |        |      |      |      |      |      |      |       |       |       |        |         |      |      |      |      |
|        | (17)                                                                                                                                                                                                                                                                              | <p data-bbox="360 794 904 821"><b>Comparison of Exp. RTI values: Cannabinol</b></p>  <p data-bbox="271 1374 990 1401">No groups have means significantly different from Lab 04</p>                                                                                                                                                                                                                                                                                                                                                                                                                                                                                                                                                                                                                                                                                                                                                                                                                                                                                                                                                                                                                                                                                                                                                                                                                                                                                                                                                                                                                                                                                                                                                                                                                                                                                                                                                                                                                                                                                                | <table border="1"> <thead> <tr> <th>Institute</th> <th>Level of identification confidence</th> <th>Exp. t<sub>R</sub> (min)</th> <th>Exp. RTI</th> <th>Pred. RTI</th> <th>ESI mode</th> <th>Application domain</th> <th>MCP</th> </tr> </thead> <tbody> <tr><td>Lab 6</td><td>N.D.</td><td>N.D.</td><td>N.D.</td><td>N.D.</td><td>N.D.</td><td>N.D.</td><td>N.D.</td></tr> <tr><td>Lab 5</td><td>N.D.</td><td>N.D.</td><td>N.D.</td><td>N.D.</td><td>N.D.</td><td>N.D.</td><td>N.D.</td></tr> <tr><td>Lab 4</td><td>2</td><td>16.40</td><td>935.41</td><td>931.59</td><td>+ESI</td><td>AD1</td><td>a</td></tr> <tr><td>Lab 12</td><td>2a</td><td>8.92</td><td>931.66</td><td>932.79</td><td>+ESI</td><td>AD1</td><td>a</td></tr> <tr><td>Lab 13</td><td>N.D.</td><td>N.D.</td><td>N.D.</td><td>N.D.</td><td>N.D.</td><td>N.D.</td><td>N.D.</td></tr> <tr><td>Lab 15</td><td>N.D.</td><td>N.D.</td><td>N.D.</td><td>N.D.</td><td>N.D.</td><td>N.D.</td><td>N.D.</td></tr> <tr><td>Lab 9</td><td>2</td><td>17.59</td><td>1024.14</td><td>932.79</td><td>+ESI</td><td>AD1</td><td>a</td></tr> <tr><td>Lab 2</td><td>N.D.</td><td>N.D.</td><td>N.D.</td><td>N.D.</td><td>N.D.</td><td>N.D.</td><td>N.D.</td></tr> <tr><td>Lab 18</td><td>N.D.</td><td>N.D.</td><td>N.D.</td><td>N.D.</td><td>N.D.</td><td>N.D.</td><td>N.D.</td></tr> <tr><td>Lab 17</td><td>N.D.</td><td>N.D.</td><td>N.D.</td><td>N.D.</td><td>N.D.</td><td>N.D.</td><td>N.D.</td></tr> <tr><td>Lab 10</td><td>N.D.</td><td>N.D.</td><td>N.D.</td><td>N.D.</td><td>N.D.</td><td>N.D.</td><td>N.D.</td></tr> <tr><td>Lab 7</td><td>N.D.</td><td>N.D.</td><td>N.D.</td><td>N.D.</td><td>N.D.</td><td>N.D.</td><td>N.D.</td></tr> </tbody> </table> <p data-bbox="1003 1273 1646 1300">AD1: Exp. &amp; Pred. tR are accepted for this candidate (box1)</p> <p data-bbox="1003 1300 1211 1327">N.D.: Not detected.</p> <p data-bbox="1003 1327 2085 1390">All institutes have acceptable exp. RTI values and the difference is <b>not significant at 99% CIs</b> of the calibration curve.</p> | Institute                          | Level of identification confidence | Exp. t <sub>R</sub> (min) | Exp. RTI           | Pred. RTI          | ESI mode           | Application domain | MCP   | Lab 6 | N.D. | N.D. | N.D. | N.D. | N.D. | N.D. | N.D.  | Lab 5 | N.D. | N.D. | N.D. | N.D. | N.D. | N.D. | N.D.  | Lab 4 | 2    | 16.40 | 935.41 | 931.59 | +ESI | AD1  | a      | Lab 12 | 2a    | 8.92    | 931.66  | 932.79 | +ESI | AD1 | a      | Lab 13 | N.D. | N.D. | N.D. | N.D. | N.D. | N.D. | N.D.   | Lab 15 | N.D.  | N.D.   | N.D.    | N.D. | N.D. | N.D. | N.D.  | Lab 9 | 2    | 17.59 | 1024.14 | 932.79 | +ESI | AD1  | a     | Lab 2 | N.D.  | N.D.    | N.D.    | N.D. | N.D. | N.D. | N.D.   | Lab 18 | N.D.  | N.D.    | N.D.    | N.D. | N.D. | N.D. | N.D.   | Lab 17 | N.D. | N.D. | N.D. | N.D. | N.D. | N.D. | N.D.   | Lab 10 | N.D. | N.D. | N.D. | N.D. | N.D. | N.D. | N.D.  | Lab 7 | N.D.  | N.D.   | N.D.    | N.D. | N.D. | N.D. | N.D. |
|        |                                                                                                                                                                                                                                                                                   | Institute                                                                                                                                                                                                                                                                                                                                                                                                                                                                                                                                                                                                                                                                                                                                                                                                                                                                                                                                                                                                                                                                                                                                                                                                                                                                                                                                                                                                                                                                                                                                                                                                                                                                                                                                                                                                                                                                                                                                                                                                                                                                                                                                                           | Level of identification confidence                                                                                                                                                                                                                                                                                                                                                                                                                                                                                                                                                                                                                                                                                                                                                                                                                                                                                                                                                                                                                                                                                                                                                                                                                                                                                                                                                                                                                                                                                                                                                                                                                                                                                                                                                                                                                                                                                                                                                                                                                       | Exp. t <sub>R</sub> (min)          | Exp. RTI                           | Pred. RTI                 | ESI mode           | Application domain | MCP                |                    |       |       |      |      |      |      |      |      |       |       |      |      |      |      |      |      |       |       |      |       |        |        |      |      |        |        |       |         |         |        |      |     |        |        |      |      |      |      |      |      |        |        |       |        |         |      |      |      |       |       |      |       |         |        |      |      |       |       |       |         |         |      |      |      |        |        |       |         |         |      |      |      |        |        |      |      |      |      |      |      |        |        |      |      |      |      |      |      |       |       |       |        |         |      |      |      |      |
| Lab 6  |                                                                                                                                                                                                                                                                                   | N.D.                                                                                                                                                                                                                                                                                                                                                                                                                                                                                                                                                                                                                                                                                                                                                                                                                                                                                                                                                                                                                                                                                                                                                                                                                                                                                                                                                                                                                                                                                                                                                                                                                                                                                                                                                                                                                                                                                                                                                                                                                                                                                                                                                                | N.D.                                                                                                                                                                                                                                                                                                                                                                                                                                                                                                                                                                                                                                                                                                                                                                                                                                                                                                                                                                                                                                                                                                                                                                                                                                                                                                                                                                                                                                                                                                                                                                                                                                                                                                                                                                                                                                                                                                                                                                                                                                                     | N.D.                               | N.D.                               | N.D.                      | N.D.               | N.D.               |                    |                    |       |       |      |      |      |      |      |      |       |       |      |      |      |      |      |      |       |       |      |       |        |        |      |      |        |        |       |         |         |        |      |     |        |        |      |      |      |      |      |      |        |        |       |        |         |      |      |      |       |       |      |       |         |        |      |      |       |       |       |         |         |      |      |      |        |        |       |         |         |      |      |      |        |        |      |      |      |      |      |      |        |        |      |      |      |      |      |      |       |       |       |        |         |      |      |      |      |
| Lab 5  |                                                                                                                                                                                                                                                                                   | N.D.                                                                                                                                                                                                                                                                                                                                                                                                                                                                                                                                                                                                                                                                                                                                                                                                                                                                                                                                                                                                                                                                                                                                                                                                                                                                                                                                                                                                                                                                                                                                                                                                                                                                                                                                                                                                                                                                                                                                                                                                                                                                                                                                                                | N.D.                                                                                                                                                                                                                                                                                                                                                                                                                                                                                                                                                                                                                                                                                                                                                                                                                                                                                                                                                                                                                                                                                                                                                                                                                                                                                                                                                                                                                                                                                                                                                                                                                                                                                                                                                                                                                                                                                                                                                                                                                                                     | N.D.                               | N.D.                               | N.D.                      | N.D.               | N.D.               |                    |                    |       |       |      |      |      |      |      |      |       |       |      |      |      |      |      |      |       |       |      |       |        |        |      |      |        |        |       |         |         |        |      |     |        |        |      |      |      |      |      |      |        |        |       |        |         |      |      |      |       |       |      |       |         |        |      |      |       |       |       |         |         |      |      |      |        |        |       |         |         |      |      |      |        |        |      |      |      |      |      |      |        |        |      |      |      |      |      |      |       |       |       |        |         |      |      |      |      |
| Lab 4  |                                                                                                                                                                                                                                                                                   | 2                                                                                                                                                                                                                                                                                                                                                                                                                                                                                                                                                                                                                                                                                                                                                                                                                                                                                                                                                                                                                                                                                                                                                                                                                                                                                                                                                                                                                                                                                                                                                                                                                                                                                                                                                                                                                                                                                                                                                                                                                                                                                                                                                                   | 16.40                                                                                                                                                                                                                                                                                                                                                                                                                                                                                                                                                                                                                                                                                                                                                                                                                                                                                                                                                                                                                                                                                                                                                                                                                                                                                                                                                                                                                                                                                                                                                                                                                                                                                                                                                                                                                                                                                                                                                                                                                                                    | 935.41                             | 931.59                             | +ESI                      | AD1                | a                  |                    |                    |       |       |      |      |      |      |      |      |       |       |      |      |      |      |      |      |       |       |      |       |        |        |      |      |        |        |       |         |         |        |      |     |        |        |      |      |      |      |      |      |        |        |       |        |         |      |      |      |       |       |      |       |         |        |      |      |       |       |       |         |         |      |      |      |        |        |       |         |         |      |      |      |        |        |      |      |      |      |      |      |        |        |      |      |      |      |      |      |       |       |       |        |         |      |      |      |      |
| Lab 12 |                                                                                                                                                                                                                                                                                   | 2a                                                                                                                                                                                                                                                                                                                                                                                                                                                                                                                                                                                                                                                                                                                                                                                                                                                                                                                                                                                                                                                                                                                                                                                                                                                                                                                                                                                                                                                                                                                                                                                                                                                                                                                                                                                                                                                                                                                                                                                                                                                                                                                                                                  | 8.92                                                                                                                                                                                                                                                                                                                                                                                                                                                                                                                                                                                                                                                                                                                                                                                                                                                                                                                                                                                                                                                                                                                                                                                                                                                                                                                                                                                                                                                                                                                                                                                                                                                                                                                                                                                                                                                                                                                                                                                                                                                     | 931.66                             | 932.79                             | +ESI                      | AD1                | a                  |                    |                    |       |       |      |      |      |      |      |      |       |       |      |      |      |      |      |      |       |       |      |       |        |        |      |      |        |        |       |         |         |        |      |     |        |        |      |      |      |      |      |      |        |        |       |        |         |      |      |      |       |       |      |       |         |        |      |      |       |       |       |         |         |      |      |      |        |        |       |         |         |      |      |      |        |        |      |      |      |      |      |      |        |        |      |      |      |      |      |      |       |       |       |        |         |      |      |      |      |
| Lab 13 |                                                                                                                                                                                                                                                                                   | N.D.                                                                                                                                                                                                                                                                                                                                                                                                                                                                                                                                                                                                                                                                                                                                                                                                                                                                                                                                                                                                                                                                                                                                                                                                                                                                                                                                                                                                                                                                                                                                                                                                                                                                                                                                                                                                                                                                                                                                                                                                                                                                                                                                                                | N.D.                                                                                                                                                                                                                                                                                                                                                                                                                                                                                                                                                                                                                                                                                                                                                                                                                                                                                                                                                                                                                                                                                                                                                                                                                                                                                                                                                                                                                                                                                                                                                                                                                                                                                                                                                                                                                                                                                                                                                                                                                                                     | N.D.                               | N.D.                               | N.D.                      | N.D.               | N.D.               |                    |                    |       |       |      |      |      |      |      |      |       |       |      |      |      |      |      |      |       |       |      |       |        |        |      |      |        |        |       |         |         |        |      |     |        |        |      |      |      |      |      |      |        |        |       |        |         |      |      |      |       |       |      |       |         |        |      |      |       |       |       |         |         |      |      |      |        |        |       |         |         |      |      |      |        |        |      |      |      |      |      |      |        |        |      |      |      |      |      |      |       |       |       |        |         |      |      |      |      |
| Lab 15 |                                                                                                                                                                                                                                                                                   | N.D.                                                                                                                                                                                                                                                                                                                                                                                                                                                                                                                                                                                                                                                                                                                                                                                                                                                                                                                                                                                                                                                                                                                                                                                                                                                                                                                                                                                                                                                                                                                                                                                                                                                                                                                                                                                                                                                                                                                                                                                                                                                                                                                                                                | N.D.                                                                                                                                                                                                                                                                                                                                                                                                                                                                                                                                                                                                                                                                                                                                                                                                                                                                                                                                                                                                                                                                                                                                                                                                                                                                                                                                                                                                                                                                                                                                                                                                                                                                                                                                                                                                                                                                                                                                                                                                                                                     | N.D.                               | N.D.                               | N.D.                      | N.D.               | N.D.               |                    |                    |       |       |      |      |      |      |      |      |       |       |      |      |      |      |      |      |       |       |      |       |        |        |      |      |        |        |       |         |         |        |      |     |        |        |      |      |      |      |      |      |        |        |       |        |         |      |      |      |       |       |      |       |         |        |      |      |       |       |       |         |         |      |      |      |        |        |       |         |         |      |      |      |        |        |      |      |      |      |      |      |        |        |      |      |      |      |      |      |       |       |       |        |         |      |      |      |      |
| Lab 9  |                                                                                                                                                                                                                                                                                   | 2                                                                                                                                                                                                                                                                                                                                                                                                                                                                                                                                                                                                                                                                                                                                                                                                                                                                                                                                                                                                                                                                                                                                                                                                                                                                                                                                                                                                                                                                                                                                                                                                                                                                                                                                                                                                                                                                                                                                                                                                                                                                                                                                                                   | 17.59                                                                                                                                                                                                                                                                                                                                                                                                                                                                                                                                                                                                                                                                                                                                                                                                                                                                                                                                                                                                                                                                                                                                                                                                                                                                                                                                                                                                                                                                                                                                                                                                                                                                                                                                                                                                                                                                                                                                                                                                                                                    | 1024.14                            | 932.79                             | +ESI                      | AD1                | a                  |                    |                    |       |       |      |      |      |      |      |      |       |       |      |      |      |      |      |      |       |       |      |       |        |        |      |      |        |        |       |         |         |        |      |     |        |        |      |      |      |      |      |      |        |        |       |        |         |      |      |      |       |       |      |       |         |        |      |      |       |       |       |         |         |      |      |      |        |        |       |         |         |      |      |      |        |        |      |      |      |      |      |      |        |        |      |      |      |      |      |      |       |       |       |        |         |      |      |      |      |
| Lab 2  |                                                                                                                                                                                                                                                                                   | N.D.                                                                                                                                                                                                                                                                                                                                                                                                                                                                                                                                                                                                                                                                                                                                                                                                                                                                                                                                                                                                                                                                                                                                                                                                                                                                                                                                                                                                                                                                                                                                                                                                                                                                                                                                                                                                                                                                                                                                                                                                                                                                                                                                                                | N.D.                                                                                                                                                                                                                                                                                                                                                                                                                                                                                                                                                                                                                                                                                                                                                                                                                                                                                                                                                                                                                                                                                                                                                                                                                                                                                                                                                                                                                                                                                                                                                                                                                                                                                                                                                                                                                                                                                                                                                                                                                                                     | N.D.                               | N.D.                               | N.D.                      | N.D.               | N.D.               |                    |                    |       |       |      |      |      |      |      |      |       |       |      |      |      |      |      |      |       |       |      |       |        |        |      |      |        |        |       |         |         |        |      |     |        |        |      |      |      |      |      |      |        |        |       |        |         |      |      |      |       |       |      |       |         |        |      |      |       |       |       |         |         |      |      |      |        |        |       |         |         |      |      |      |        |        |      |      |      |      |      |      |        |        |      |      |      |      |      |      |       |       |       |        |         |      |      |      |      |
| Lab 18 |                                                                                                                                                                                                                                                                                   | N.D.                                                                                                                                                                                                                                                                                                                                                                                                                                                                                                                                                                                                                                                                                                                                                                                                                                                                                                                                                                                                                                                                                                                                                                                                                                                                                                                                                                                                                                                                                                                                                                                                                                                                                                                                                                                                                                                                                                                                                                                                                                                                                                                                                                | N.D.                                                                                                                                                                                                                                                                                                                                                                                                                                                                                                                                                                                                                                                                                                                                                                                                                                                                                                                                                                                                                                                                                                                                                                                                                                                                                                                                                                                                                                                                                                                                                                                                                                                                                                                                                                                                                                                                                                                                                                                                                                                     | N.D.                               | N.D.                               | N.D.                      | N.D.               | N.D.               |                    |                    |       |       |      |      |      |      |      |      |       |       |      |      |      |      |      |      |       |       |      |       |        |        |      |      |        |        |       |         |         |        |      |     |        |        |      |      |      |      |      |      |        |        |       |        |         |      |      |      |       |       |      |       |         |        |      |      |       |       |       |         |         |      |      |      |        |        |       |         |         |      |      |      |        |        |      |      |      |      |      |      |        |        |      |      |      |      |      |      |       |       |       |        |         |      |      |      |      |
| Lab 17 |                                                                                                                                                                                                                                                                                   | N.D.                                                                                                                                                                                                                                                                                                                                                                                                                                                                                                                                                                                                                                                                                                                                                                                                                                                                                                                                                                                                                                                                                                                                                                                                                                                                                                                                                                                                                                                                                                                                                                                                                                                                                                                                                                                                                                                                                                                                                                                                                                                                                                                                                                | N.D.                                                                                                                                                                                                                                                                                                                                                                                                                                                                                                                                                                                                                                                                                                                                                                                                                                                                                                                                                                                                                                                                                                                                                                                                                                                                                                                                                                                                                                                                                                                                                                                                                                                                                                                                                                                                                                                                                                                                                                                                                                                     | N.D.                               | N.D.                               | N.D.                      | N.D.               | N.D.               |                    |                    |       |       |      |      |      |      |      |      |       |       |      |      |      |      |      |      |       |       |      |       |        |        |      |      |        |        |       |         |         |        |      |     |        |        |      |      |      |      |      |      |        |        |       |        |         |      |      |      |       |       |      |       |         |        |      |      |       |       |       |         |         |      |      |      |        |        |       |         |         |      |      |      |        |        |      |      |      |      |      |      |        |        |      |      |      |      |      |      |       |       |       |        |         |      |      |      |      |
| Lab 10 |                                                                                                                                                                                                                                                                                   | N.D.                                                                                                                                                                                                                                                                                                                                                                                                                                                                                                                                                                                                                                                                                                                                                                                                                                                                                                                                                                                                                                                                                                                                                                                                                                                                                                                                                                                                                                                                                                                                                                                                                                                                                                                                                                                                                                                                                                                                                                                                                                                                                                                                                                | N.D.                                                                                                                                                                                                                                                                                                                                                                                                                                                                                                                                                                                                                                                                                                                                                                                                                                                                                                                                                                                                                                                                                                                                                                                                                                                                                                                                                                                                                                                                                                                                                                                                                                                                                                                                                                                                                                                                                                                                                                                                                                                     | N.D.                               | N.D.                               | N.D.                      | N.D.               | N.D.               |                    |                    |       |       |      |      |      |      |      |      |       |       |      |      |      |      |      |      |       |       |      |       |        |        |      |      |        |        |       |         |         |        |      |     |        |        |      |      |      |      |      |      |        |        |       |        |         |      |      |      |       |       |      |       |         |        |      |      |       |       |       |         |         |      |      |      |        |        |       |         |         |      |      |      |        |        |      |      |      |      |      |      |        |        |      |      |      |      |      |      |       |       |       |        |         |      |      |      |      |
| Lab 7  |                                                                                                                                                                                                                                                                                   | N.D.                                                                                                                                                                                                                                                                                                                                                                                                                                                                                                                                                                                                                                                                                                                                                                                                                                                                                                                                                                                                                                                                                                                                                                                                                                                                                                                                                                                                                                                                                                                                                                                                                                                                                                                                                                                                                                                                                                                                                                                                                                                                                                                                                                | N.D.                                                                                                                                                                                                                                                                                                                                                                                                                                                                                                                                                                                                                                                                                                                                                                                                                                                                                                                                                                                                                                                                                                                                                                                                                                                                                                                                                                                                                                                                                                                                                                                                                                                                                                                                                                                                                                                                                                                                                                                                                                                     | N.D.                               | N.D.                               | N.D.                      | N.D.               | N.D.               |                    |                    |       |       |      |      |      |      |      |      |       |       |      |      |      |      |      |      |       |       |      |       |        |        |      |      |        |        |       |         |         |        |      |     |        |        |      |      |      |      |      |      |        |        |       |        |         |      |      |      |       |       |      |       |         |        |      |      |       |       |       |         |         |      |      |      |        |        |       |         |         |      |      |      |        |        |      |      |      |      |      |      |        |        |      |      |      |      |      |      |       |       |       |        |         |      |      |      |      |

| No.    | multiple comparison procedure plot                                                                                                                                                                                                                                  | RTI details                                                                                                                                                                                                                                                                                                                                                                                                                                                                                                                                                                                                                                                                                                                                                                                                                                                                                                                                                                                                                                                                                                                                                                                                                                                                                                                                                                                                                                                                                                                                                                                                                                                                                                                                                                                                                                                                                                                                                       |                           |                                    |                           |          |                    |          |                    |     |       |   |       |        |        |      |     |   |       |      |      |      |      |      |      |      |       |      |       |        |        |      |      |      |        |      |      |        |        |      |      |      |        |      |      |      |      |      |      |      |        |      |      |      |      |      |      |      |       |      |      |        |        |      |      |      |       |      |      |      |      |      |      |      |        |      |      |      |      |      |      |      |        |      |      |      |      |      |      |      |        |      |      |      |      |      |      |      |       |      |      |      |      |      |      |      |
|--------|---------------------------------------------------------------------------------------------------------------------------------------------------------------------------------------------------------------------------------------------------------------------|-------------------------------------------------------------------------------------------------------------------------------------------------------------------------------------------------------------------------------------------------------------------------------------------------------------------------------------------------------------------------------------------------------------------------------------------------------------------------------------------------------------------------------------------------------------------------------------------------------------------------------------------------------------------------------------------------------------------------------------------------------------------------------------------------------------------------------------------------------------------------------------------------------------------------------------------------------------------------------------------------------------------------------------------------------------------------------------------------------------------------------------------------------------------------------------------------------------------------------------------------------------------------------------------------------------------------------------------------------------------------------------------------------------------------------------------------------------------------------------------------------------------------------------------------------------------------------------------------------------------------------------------------------------------------------------------------------------------------------------------------------------------------------------------------------------------------------------------------------------------------------------------------------------------------------------------------------------------|---------------------------|------------------------------------|---------------------------|----------|--------------------|----------|--------------------|-----|-------|---|-------|--------|--------|------|-----|---|-------|------|------|------|------|------|------|------|-------|------|-------|--------|--------|------|------|------|--------|------|------|--------|--------|------|------|------|--------|------|------|------|------|------|------|------|--------|------|------|------|------|------|------|------|-------|------|------|--------|--------|------|------|------|-------|------|------|------|------|------|------|------|--------|------|------|------|------|------|------|------|--------|------|------|------|------|------|------|------|--------|------|------|------|------|------|------|------|-------|------|------|------|------|------|------|------|
| (18)   | <p style="text-align: center;"><b>Comparison of Exp. RTI values: Trimethoprim</b></p> 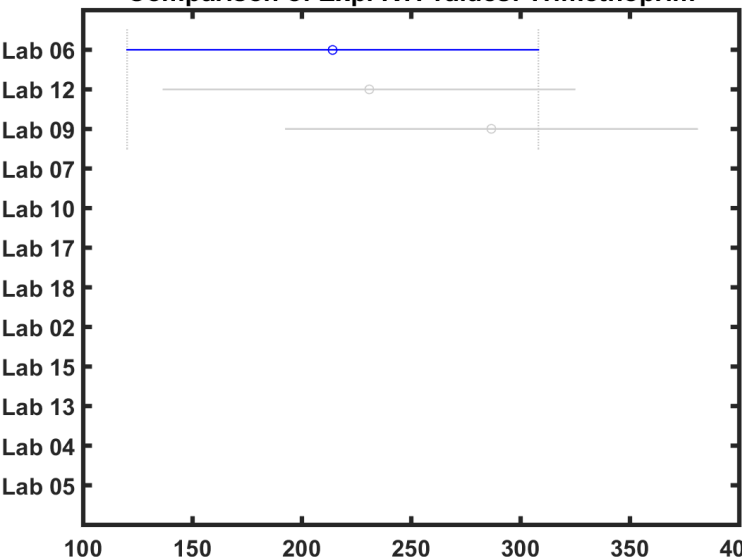 <p style="text-align: center;">No groups have means significantly different from Lab 06</p> | <table border="1"> <thead> <tr> <th>Institute</th> <th>Level of identification confidence</th> <th>Exp. t<sub>R</sub> (min)</th> <th>Exp. RTI</th> <th>Pred. RTI</th> <th>ESI mode</th> <th>Application domain</th> <th>MCP</th> </tr> </thead> <tbody> <tr><td>Lab 6</td><td>1</td><td>4.11</td><td>214.10</td><td>276.11</td><td>+ESI</td><td>AD1</td><td>a</td></tr> <tr><td>Lab 5</td><td>N.D.</td><td>N.D.</td><td>N.D.</td><td>N.D.</td><td>N.D.</td><td>N.D.</td><td>N.D.</td></tr> <tr><td>Lab 4</td><td>N.D.</td><td>N.D.</td><td>N.D.</td><td>N.D.</td><td>N.D.</td><td>N.D.</td><td>N.D.</td></tr> <tr><td>Lab 12</td><td>2a</td><td>2.54</td><td>230.69</td><td>254.91</td><td>+ESI</td><td>AD1</td><td>a</td></tr> <tr><td>Lab 13</td><td>N.D.</td><td>N.D.</td><td>N.D.</td><td>N.D.</td><td>N.D.</td><td>N.D.</td><td>N.D.</td></tr> <tr><td>Lab 15</td><td>N.D.</td><td>N.D.</td><td>N.D.</td><td>N.D.</td><td>N.D.</td><td>N.D.</td><td>N.D.</td></tr> <tr><td>Lab 9</td><td>2</td><td>6.72</td><td>297.30</td><td>254.91</td><td>+ESI</td><td>AD1</td><td>a</td></tr> <tr><td>Lab 2</td><td>N.D.</td><td>N.D.</td><td>N.D.</td><td>N.D.</td><td>N.D.</td><td>N.D.</td><td>N.D.</td></tr> <tr><td>Lab 18</td><td>N.D.</td><td>N.D.</td><td>N.D.</td><td>N.D.</td><td>N.D.</td><td>N.D.</td><td>N.D.</td></tr> <tr><td>Lab 17</td><td>N.D.</td><td>N.D.</td><td>N.D.</td><td>N.D.</td><td>N.D.</td><td>N.D.</td><td>N.D.</td></tr> <tr><td>Lab 10</td><td>N.D.</td><td>N.D.</td><td>N.D.</td><td>N.D.</td><td>N.D.</td><td>N.D.</td><td>N.D.</td></tr> <tr><td>Lab 7</td><td>N.D.</td><td>N.D.</td><td>N.D.</td><td>N.D.</td><td>N.D.</td><td>N.D.</td><td>N.D.</td></tr> </tbody> </table> <p>AD1: Exp. &amp; Pred. t<sub>R</sub> are accepted for this candidate (box1)<br/>N.D.: Not detected.</p> <p>All institutes have acceptable exp. RTI values and the difference is <b>not significant at 99% CIs</b> of the calibration curve.</p>     | Institute                 | Level of identification confidence | Exp. t <sub>R</sub> (min) | Exp. RTI | Pred. RTI          | ESI mode | Application domain | MCP | Lab 6 | 1 | 4.11  | 214.10 | 276.11 | +ESI | AD1 | a | Lab 5 | N.D. | N.D. | N.D. | N.D. | N.D. | N.D. | N.D. | Lab 4 | N.D. | N.D.  | N.D.   | N.D.   | N.D. | N.D. | N.D. | Lab 12 | 2a   | 2.54 | 230.69 | 254.91 | +ESI | AD1  | a    | Lab 13 | N.D. | N.D. | N.D. | N.D. | N.D. | N.D. | N.D. | Lab 15 | N.D. | N.D. | N.D. | N.D. | N.D. | N.D. | N.D. | Lab 9 | 2    | 6.72 | 297.30 | 254.91 | +ESI | AD1  | a    | Lab 2 | N.D. | N.D. | N.D. | N.D. | N.D. | N.D. | N.D. | Lab 18 | N.D. | N.D. | N.D. | N.D. | N.D. | N.D. | N.D. | Lab 17 | N.D. | N.D. | N.D. | N.D. | N.D. | N.D. | N.D. | Lab 10 | N.D. | N.D. | N.D. | N.D. | N.D. | N.D. | N.D. | Lab 7 | N.D. | N.D. | N.D. | N.D. | N.D. | N.D. | N.D. |
|        | Institute                                                                                                                                                                                                                                                           | Level of identification confidence                                                                                                                                                                                                                                                                                                                                                                                                                                                                                                                                                                                                                                                                                                                                                                                                                                                                                                                                                                                                                                                                                                                                                                                                                                                                                                                                                                                                                                                                                                                                                                                                                                                                                                                                                                                                                                                                                                                                | Exp. t <sub>R</sub> (min) | Exp. RTI                           | Pred. RTI                 | ESI mode | Application domain | MCP      |                    |     |       |   |       |        |        |      |     |   |       |      |      |      |      |      |      |      |       |      |       |        |        |      |      |      |        |      |      |        |        |      |      |      |        |      |      |      |      |      |      |      |        |      |      |      |      |      |      |      |       |      |      |        |        |      |      |      |       |      |      |      |      |      |      |      |        |      |      |      |      |      |      |      |        |      |      |      |      |      |      |      |        |      |      |      |      |      |      |      |       |      |      |      |      |      |      |      |
| Lab 6  | 1                                                                                                                                                                                                                                                                   | 4.11                                                                                                                                                                                                                                                                                                                                                                                                                                                                                                                                                                                                                                                                                                                                                                                                                                                                                                                                                                                                                                                                                                                                                                                                                                                                                                                                                                                                                                                                                                                                                                                                                                                                                                                                                                                                                                                                                                                                                              | 214.10                    | 276.11                             | +ESI                      | AD1      | a                  |          |                    |     |       |   |       |        |        |      |     |   |       |      |      |      |      |      |      |      |       |      |       |        |        |      |      |      |        |      |      |        |        |      |      |      |        |      |      |      |      |      |      |      |        |      |      |      |      |      |      |      |       |      |      |        |        |      |      |      |       |      |      |      |      |      |      |      |        |      |      |      |      |      |      |      |        |      |      |      |      |      |      |      |        |      |      |      |      |      |      |      |       |      |      |      |      |      |      |      |
| Lab 5  | N.D.                                                                                                                                                                                                                                                                | N.D.                                                                                                                                                                                                                                                                                                                                                                                                                                                                                                                                                                                                                                                                                                                                                                                                                                                                                                                                                                                                                                                                                                                                                                                                                                                                                                                                                                                                                                                                                                                                                                                                                                                                                                                                                                                                                                                                                                                                                              | N.D.                      | N.D.                               | N.D.                      | N.D.     | N.D.               |          |                    |     |       |   |       |        |        |      |     |   |       |      |      |      |      |      |      |      |       |      |       |        |        |      |      |      |        |      |      |        |        |      |      |      |        |      |      |      |      |      |      |      |        |      |      |      |      |      |      |      |       |      |      |        |        |      |      |      |       |      |      |      |      |      |      |      |        |      |      |      |      |      |      |      |        |      |      |      |      |      |      |      |        |      |      |      |      |      |      |      |       |      |      |      |      |      |      |      |
| Lab 4  | N.D.                                                                                                                                                                                                                                                                | N.D.                                                                                                                                                                                                                                                                                                                                                                                                                                                                                                                                                                                                                                                                                                                                                                                                                                                                                                                                                                                                                                                                                                                                                                                                                                                                                                                                                                                                                                                                                                                                                                                                                                                                                                                                                                                                                                                                                                                                                              | N.D.                      | N.D.                               | N.D.                      | N.D.     | N.D.               |          |                    |     |       |   |       |        |        |      |     |   |       |      |      |      |      |      |      |      |       |      |       |        |        |      |      |      |        |      |      |        |        |      |      |      |        |      |      |      |      |      |      |      |        |      |      |      |      |      |      |      |       |      |      |        |        |      |      |      |       |      |      |      |      |      |      |      |        |      |      |      |      |      |      |      |        |      |      |      |      |      |      |      |        |      |      |      |      |      |      |      |       |      |      |      |      |      |      |      |
| Lab 12 | 2a                                                                                                                                                                                                                                                                  | 2.54                                                                                                                                                                                                                                                                                                                                                                                                                                                                                                                                                                                                                                                                                                                                                                                                                                                                                                                                                                                                                                                                                                                                                                                                                                                                                                                                                                                                                                                                                                                                                                                                                                                                                                                                                                                                                                                                                                                                                              | 230.69                    | 254.91                             | +ESI                      | AD1      | a                  |          |                    |     |       |   |       |        |        |      |     |   |       |      |      |      |      |      |      |      |       |      |       |        |        |      |      |      |        |      |      |        |        |      |      |      |        |      |      |      |      |      |      |      |        |      |      |      |      |      |      |      |       |      |      |        |        |      |      |      |       |      |      |      |      |      |      |      |        |      |      |      |      |      |      |      |        |      |      |      |      |      |      |      |        |      |      |      |      |      |      |      |       |      |      |      |      |      |      |      |
| Lab 13 | N.D.                                                                                                                                                                                                                                                                | N.D.                                                                                                                                                                                                                                                                                                                                                                                                                                                                                                                                                                                                                                                                                                                                                                                                                                                                                                                                                                                                                                                                                                                                                                                                                                                                                                                                                                                                                                                                                                                                                                                                                                                                                                                                                                                                                                                                                                                                                              | N.D.                      | N.D.                               | N.D.                      | N.D.     | N.D.               |          |                    |     |       |   |       |        |        |      |     |   |       |      |      |      |      |      |      |      |       |      |       |        |        |      |      |      |        |      |      |        |        |      |      |      |        |      |      |      |      |      |      |      |        |      |      |      |      |      |      |      |       |      |      |        |        |      |      |      |       |      |      |      |      |      |      |      |        |      |      |      |      |      |      |      |        |      |      |      |      |      |      |      |        |      |      |      |      |      |      |      |       |      |      |      |      |      |      |      |
| Lab 15 | N.D.                                                                                                                                                                                                                                                                | N.D.                                                                                                                                                                                                                                                                                                                                                                                                                                                                                                                                                                                                                                                                                                                                                                                                                                                                                                                                                                                                                                                                                                                                                                                                                                                                                                                                                                                                                                                                                                                                                                                                                                                                                                                                                                                                                                                                                                                                                              | N.D.                      | N.D.                               | N.D.                      | N.D.     | N.D.               |          |                    |     |       |   |       |        |        |      |     |   |       |      |      |      |      |      |      |      |       |      |       |        |        |      |      |      |        |      |      |        |        |      |      |      |        |      |      |      |      |      |      |      |        |      |      |      |      |      |      |      |       |      |      |        |        |      |      |      |       |      |      |      |      |      |      |      |        |      |      |      |      |      |      |      |        |      |      |      |      |      |      |      |        |      |      |      |      |      |      |      |       |      |      |      |      |      |      |      |
| Lab 9  | 2                                                                                                                                                                                                                                                                   | 6.72                                                                                                                                                                                                                                                                                                                                                                                                                                                                                                                                                                                                                                                                                                                                                                                                                                                                                                                                                                                                                                                                                                                                                                                                                                                                                                                                                                                                                                                                                                                                                                                                                                                                                                                                                                                                                                                                                                                                                              | 297.30                    | 254.91                             | +ESI                      | AD1      | a                  |          |                    |     |       |   |       |        |        |      |     |   |       |      |      |      |      |      |      |      |       |      |       |        |        |      |      |      |        |      |      |        |        |      |      |      |        |      |      |      |      |      |      |      |        |      |      |      |      |      |      |      |       |      |      |        |        |      |      |      |       |      |      |      |      |      |      |      |        |      |      |      |      |      |      |      |        |      |      |      |      |      |      |      |        |      |      |      |      |      |      |      |       |      |      |      |      |      |      |      |
| Lab 2  | N.D.                                                                                                                                                                                                                                                                | N.D.                                                                                                                                                                                                                                                                                                                                                                                                                                                                                                                                                                                                                                                                                                                                                                                                                                                                                                                                                                                                                                                                                                                                                                                                                                                                                                                                                                                                                                                                                                                                                                                                                                                                                                                                                                                                                                                                                                                                                              | N.D.                      | N.D.                               | N.D.                      | N.D.     | N.D.               |          |                    |     |       |   |       |        |        |      |     |   |       |      |      |      |      |      |      |      |       |      |       |        |        |      |      |      |        |      |      |        |        |      |      |      |        |      |      |      |      |      |      |      |        |      |      |      |      |      |      |      |       |      |      |        |        |      |      |      |       |      |      |      |      |      |      |      |        |      |      |      |      |      |      |      |        |      |      |      |      |      |      |      |        |      |      |      |      |      |      |      |       |      |      |      |      |      |      |      |
| Lab 18 | N.D.                                                                                                                                                                                                                                                                | N.D.                                                                                                                                                                                                                                                                                                                                                                                                                                                                                                                                                                                                                                                                                                                                                                                                                                                                                                                                                                                                                                                                                                                                                                                                                                                                                                                                                                                                                                                                                                                                                                                                                                                                                                                                                                                                                                                                                                                                                              | N.D.                      | N.D.                               | N.D.                      | N.D.     | N.D.               |          |                    |     |       |   |       |        |        |      |     |   |       |      |      |      |      |      |      |      |       |      |       |        |        |      |      |      |        |      |      |        |        |      |      |      |        |      |      |      |      |      |      |      |        |      |      |      |      |      |      |      |       |      |      |        |        |      |      |      |       |      |      |      |      |      |      |      |        |      |      |      |      |      |      |      |        |      |      |      |      |      |      |      |        |      |      |      |      |      |      |      |       |      |      |      |      |      |      |      |
| Lab 17 | N.D.                                                                                                                                                                                                                                                                | N.D.                                                                                                                                                                                                                                                                                                                                                                                                                                                                                                                                                                                                                                                                                                                                                                                                                                                                                                                                                                                                                                                                                                                                                                                                                                                                                                                                                                                                                                                                                                                                                                                                                                                                                                                                                                                                                                                                                                                                                              | N.D.                      | N.D.                               | N.D.                      | N.D.     | N.D.               |          |                    |     |       |   |       |        |        |      |     |   |       |      |      |      |      |      |      |      |       |      |       |        |        |      |      |      |        |      |      |        |        |      |      |      |        |      |      |      |      |      |      |      |        |      |      |      |      |      |      |      |       |      |      |        |        |      |      |      |       |      |      |      |      |      |      |      |        |      |      |      |      |      |      |      |        |      |      |      |      |      |      |      |        |      |      |      |      |      |      |      |       |      |      |      |      |      |      |      |
| Lab 10 | N.D.                                                                                                                                                                                                                                                                | N.D.                                                                                                                                                                                                                                                                                                                                                                                                                                                                                                                                                                                                                                                                                                                                                                                                                                                                                                                                                                                                                                                                                                                                                                                                                                                                                                                                                                                                                                                                                                                                                                                                                                                                                                                                                                                                                                                                                                                                                              | N.D.                      | N.D.                               | N.D.                      | N.D.     | N.D.               |          |                    |     |       |   |       |        |        |      |     |   |       |      |      |      |      |      |      |      |       |      |       |        |        |      |      |      |        |      |      |        |        |      |      |      |        |      |      |      |      |      |      |      |        |      |      |      |      |      |      |      |       |      |      |        |        |      |      |      |       |      |      |      |      |      |      |      |        |      |      |      |      |      |      |      |        |      |      |      |      |      |      |      |        |      |      |      |      |      |      |      |       |      |      |      |      |      |      |      |
| Lab 7  | N.D.                                                                                                                                                                                                                                                                | N.D.                                                                                                                                                                                                                                                                                                                                                                                                                                                                                                                                                                                                                                                                                                                                                                                                                                                                                                                                                                                                                                                                                                                                                                                                                                                                                                                                                                                                                                                                                                                                                                                                                                                                                                                                                                                                                                                                                                                                                              | N.D.                      | N.D.                               | N.D.                      | N.D.     | N.D.               |          |                    |     |       |   |       |        |        |      |     |   |       |      |      |      |      |      |      |      |       |      |       |        |        |      |      |      |        |      |      |        |        |      |      |      |        |      |      |      |      |      |      |      |        |      |      |      |      |      |      |      |       |      |      |        |        |      |      |      |       |      |      |      |      |      |      |      |        |      |      |      |      |      |      |      |        |      |      |      |      |      |      |      |        |      |      |      |      |      |      |      |       |      |      |      |      |      |      |      |
| (19)   | <p style="text-align: center;"><b>Comparison of Exp. RTI values: Capsaicin</b></p>  <p style="text-align: center;">No groups have means significantly different from Lab 06</p>   | <table border="1"> <thead> <tr> <th>Institute</th> <th>Level of identification confidence</th> <th>Exp. t<sub>R</sub> (min)</th> <th>Exp. RTI</th> <th>Pred. RTI</th> <th>ESI mode</th> <th>Application domain</th> <th>MCP</th> </tr> </thead> <tbody> <tr><td>Lab 6</td><td>1</td><td>10.03</td><td>666.17</td><td>655.26</td><td>+ESI</td><td>AD1</td><td>a</td></tr> <tr><td>Lab 5</td><td>N.D.</td><td>N.D.</td><td>N.D.</td><td>N.D.</td><td>N.D.</td><td>N.D.</td><td>N.D.</td></tr> <tr><td>Lab 4</td><td>2</td><td>11.89</td><td>654.47</td><td>655.26</td><td>+ESI</td><td>AD1</td><td>a</td></tr> <tr><td>Lab 12</td><td>N.D.</td><td>N.D.</td><td>N.D.</td><td>N.D.</td><td>N.D.</td><td>N.D.</td><td>N.D.</td></tr> <tr><td>Lab 13</td><td>N.D.</td><td>N.D.</td><td>N.D.</td><td>N.D.</td><td>N.D.</td><td>N.D.</td><td>N.D.</td></tr> <tr><td>Lab 15</td><td>N.D.</td><td>N.D.</td><td>N.D.</td><td>N.D.</td><td>N.D.</td><td>N.D.</td><td>N.D.</td></tr> <tr><td>Lab 9</td><td>N.D.</td><td>N.D.</td><td>N.D.</td><td>N.D.</td><td>N.D.</td><td>N.D.</td><td>N.D.</td></tr> <tr><td>Lab 2</td><td>N.D.</td><td>N.D.</td><td>N.D.</td><td>N.D.</td><td>N.D.</td><td>N.D.</td><td>N.D.</td></tr> <tr><td>Lab 18</td><td>N.D.</td><td>N.D.</td><td>N.D.</td><td>N.D.</td><td>N.D.</td><td>N.D.</td><td>N.D.</td></tr> <tr><td>Lab 17</td><td>N.D.</td><td>N.D.</td><td>N.D.</td><td>N.D.</td><td>N.D.</td><td>N.D.</td><td>N.D.</td></tr> <tr><td>Lab 10</td><td>N.D.</td><td>N.D.</td><td>N.D.</td><td>N.D.</td><td>N.D.</td><td>N.D.</td><td>N.D.</td></tr> <tr><td>Lab 7</td><td>N.D.</td><td>N.D.</td><td>N.D.</td><td>N.D.</td><td>N.D.</td><td>N.D.</td><td>N.D.</td></tr> </tbody> </table> <p>AD1: Exp. &amp; Pred. t<sub>R</sub> are accepted for this candidate (box1)<br/>N.D.: Not detected.</p> <p>All institutes have acceptable exp. RTI values and the difference is <b>not significant at 99% CIs</b> of the calibration curve.</p> | Institute                 | Level of identification confidence | Exp. t <sub>R</sub> (min) | Exp. RTI | Pred. RTI          | ESI mode | Application domain | MCP | Lab 6 | 1 | 10.03 | 666.17 | 655.26 | +ESI | AD1 | a | Lab 5 | N.D. | N.D. | N.D. | N.D. | N.D. | N.D. | N.D. | Lab 4 | 2    | 11.89 | 654.47 | 655.26 | +ESI | AD1  | a    | Lab 12 | N.D. | N.D. | N.D.   | N.D.   | N.D. | N.D. | N.D. | Lab 13 | N.D. | N.D. | N.D. | N.D. | N.D. | N.D. | N.D. | Lab 15 | N.D. | N.D. | N.D. | N.D. | N.D. | N.D. | N.D. | Lab 9 | N.D. | N.D. | N.D.   | N.D.   | N.D. | N.D. | N.D. | Lab 2 | N.D. | N.D. | N.D. | N.D. | N.D. | N.D. | N.D. | Lab 18 | N.D. | N.D. | N.D. | N.D. | N.D. | N.D. | N.D. | Lab 17 | N.D. | N.D. | N.D. | N.D. | N.D. | N.D. | N.D. | Lab 10 | N.D. | N.D. | N.D. | N.D. | N.D. | N.D. | N.D. | Lab 7 | N.D. | N.D. | N.D. | N.D. | N.D. | N.D. | N.D. |
|        | Institute                                                                                                                                                                                                                                                           | Level of identification confidence                                                                                                                                                                                                                                                                                                                                                                                                                                                                                                                                                                                                                                                                                                                                                                                                                                                                                                                                                                                                                                                                                                                                                                                                                                                                                                                                                                                                                                                                                                                                                                                                                                                                                                                                                                                                                                                                                                                                | Exp. t <sub>R</sub> (min) | Exp. RTI                           | Pred. RTI                 | ESI mode | Application domain | MCP      |                    |     |       |   |       |        |        |      |     |   |       |      |      |      |      |      |      |      |       |      |       |        |        |      |      |      |        |      |      |        |        |      |      |      |        |      |      |      |      |      |      |      |        |      |      |      |      |      |      |      |       |      |      |        |        |      |      |      |       |      |      |      |      |      |      |      |        |      |      |      |      |      |      |      |        |      |      |      |      |      |      |      |        |      |      |      |      |      |      |      |       |      |      |      |      |      |      |      |
| Lab 6  | 1                                                                                                                                                                                                                                                                   | 10.03                                                                                                                                                                                                                                                                                                                                                                                                                                                                                                                                                                                                                                                                                                                                                                                                                                                                                                                                                                                                                                                                                                                                                                                                                                                                                                                                                                                                                                                                                                                                                                                                                                                                                                                                                                                                                                                                                                                                                             | 666.17                    | 655.26                             | +ESI                      | AD1      | a                  |          |                    |     |       |   |       |        |        |      |     |   |       |      |      |      |      |      |      |      |       |      |       |        |        |      |      |      |        |      |      |        |        |      |      |      |        |      |      |      |      |      |      |      |        |      |      |      |      |      |      |      |       |      |      |        |        |      |      |      |       |      |      |      |      |      |      |      |        |      |      |      |      |      |      |      |        |      |      |      |      |      |      |      |        |      |      |      |      |      |      |      |       |      |      |      |      |      |      |      |
| Lab 5  | N.D.                                                                                                                                                                                                                                                                | N.D.                                                                                                                                                                                                                                                                                                                                                                                                                                                                                                                                                                                                                                                                                                                                                                                                                                                                                                                                                                                                                                                                                                                                                                                                                                                                                                                                                                                                                                                                                                                                                                                                                                                                                                                                                                                                                                                                                                                                                              | N.D.                      | N.D.                               | N.D.                      | N.D.     | N.D.               |          |                    |     |       |   |       |        |        |      |     |   |       |      |      |      |      |      |      |      |       |      |       |        |        |      |      |      |        |      |      |        |        |      |      |      |        |      |      |      |      |      |      |      |        |      |      |      |      |      |      |      |       |      |      |        |        |      |      |      |       |      |      |      |      |      |      |      |        |      |      |      |      |      |      |      |        |      |      |      |      |      |      |      |        |      |      |      |      |      |      |      |       |      |      |      |      |      |      |      |
| Lab 4  | 2                                                                                                                                                                                                                                                                   | 11.89                                                                                                                                                                                                                                                                                                                                                                                                                                                                                                                                                                                                                                                                                                                                                                                                                                                                                                                                                                                                                                                                                                                                                                                                                                                                                                                                                                                                                                                                                                                                                                                                                                                                                                                                                                                                                                                                                                                                                             | 654.47                    | 655.26                             | +ESI                      | AD1      | a                  |          |                    |     |       |   |       |        |        |      |     |   |       |      |      |      |      |      |      |      |       |      |       |        |        |      |      |      |        |      |      |        |        |      |      |      |        |      |      |      |      |      |      |      |        |      |      |      |      |      |      |      |       |      |      |        |        |      |      |      |       |      |      |      |      |      |      |      |        |      |      |      |      |      |      |      |        |      |      |      |      |      |      |      |        |      |      |      |      |      |      |      |       |      |      |      |      |      |      |      |
| Lab 12 | N.D.                                                                                                                                                                                                                                                                | N.D.                                                                                                                                                                                                                                                                                                                                                                                                                                                                                                                                                                                                                                                                                                                                                                                                                                                                                                                                                                                                                                                                                                                                                                                                                                                                                                                                                                                                                                                                                                                                                                                                                                                                                                                                                                                                                                                                                                                                                              | N.D.                      | N.D.                               | N.D.                      | N.D.     | N.D.               |          |                    |     |       |   |       |        |        |      |     |   |       |      |      |      |      |      |      |      |       |      |       |        |        |      |      |      |        |      |      |        |        |      |      |      |        |      |      |      |      |      |      |      |        |      |      |      |      |      |      |      |       |      |      |        |        |      |      |      |       |      |      |      |      |      |      |      |        |      |      |      |      |      |      |      |        |      |      |      |      |      |      |      |        |      |      |      |      |      |      |      |       |      |      |      |      |      |      |      |
| Lab 13 | N.D.                                                                                                                                                                                                                                                                | N.D.                                                                                                                                                                                                                                                                                                                                                                                                                                                                                                                                                                                                                                                                                                                                                                                                                                                                                                                                                                                                                                                                                                                                                                                                                                                                                                                                                                                                                                                                                                                                                                                                                                                                                                                                                                                                                                                                                                                                                              | N.D.                      | N.D.                               | N.D.                      | N.D.     | N.D.               |          |                    |     |       |   |       |        |        |      |     |   |       |      |      |      |      |      |      |      |       |      |       |        |        |      |      |      |        |      |      |        |        |      |      |      |        |      |      |      |      |      |      |      |        |      |      |      |      |      |      |      |       |      |      |        |        |      |      |      |       |      |      |      |      |      |      |      |        |      |      |      |      |      |      |      |        |      |      |      |      |      |      |      |        |      |      |      |      |      |      |      |       |      |      |      |      |      |      |      |
| Lab 15 | N.D.                                                                                                                                                                                                                                                                | N.D.                                                                                                                                                                                                                                                                                                                                                                                                                                                                                                                                                                                                                                                                                                                                                                                                                                                                                                                                                                                                                                                                                                                                                                                                                                                                                                                                                                                                                                                                                                                                                                                                                                                                                                                                                                                                                                                                                                                                                              | N.D.                      | N.D.                               | N.D.                      | N.D.     | N.D.               |          |                    |     |       |   |       |        |        |      |     |   |       |      |      |      |      |      |      |      |       |      |       |        |        |      |      |      |        |      |      |        |        |      |      |      |        |      |      |      |      |      |      |      |        |      |      |      |      |      |      |      |       |      |      |        |        |      |      |      |       |      |      |      |      |      |      |      |        |      |      |      |      |      |      |      |        |      |      |      |      |      |      |      |        |      |      |      |      |      |      |      |       |      |      |      |      |      |      |      |
| Lab 9  | N.D.                                                                                                                                                                                                                                                                | N.D.                                                                                                                                                                                                                                                                                                                                                                                                                                                                                                                                                                                                                                                                                                                                                                                                                                                                                                                                                                                                                                                                                                                                                                                                                                                                                                                                                                                                                                                                                                                                                                                                                                                                                                                                                                                                                                                                                                                                                              | N.D.                      | N.D.                               | N.D.                      | N.D.     | N.D.               |          |                    |     |       |   |       |        |        |      |     |   |       |      |      |      |      |      |      |      |       |      |       |        |        |      |      |      |        |      |      |        |        |      |      |      |        |      |      |      |      |      |      |      |        |      |      |      |      |      |      |      |       |      |      |        |        |      |      |      |       |      |      |      |      |      |      |      |        |      |      |      |      |      |      |      |        |      |      |      |      |      |      |      |        |      |      |      |      |      |      |      |       |      |      |      |      |      |      |      |
| Lab 2  | N.D.                                                                                                                                                                                                                                                                | N.D.                                                                                                                                                                                                                                                                                                                                                                                                                                                                                                                                                                                                                                                                                                                                                                                                                                                                                                                                                                                                                                                                                                                                                                                                                                                                                                                                                                                                                                                                                                                                                                                                                                                                                                                                                                                                                                                                                                                                                              | N.D.                      | N.D.                               | N.D.                      | N.D.     | N.D.               |          |                    |     |       |   |       |        |        |      |     |   |       |      |      |      |      |      |      |      |       |      |       |        |        |      |      |      |        |      |      |        |        |      |      |      |        |      |      |      |      |      |      |      |        |      |      |      |      |      |      |      |       |      |      |        |        |      |      |      |       |      |      |      |      |      |      |      |        |      |      |      |      |      |      |      |        |      |      |      |      |      |      |      |        |      |      |      |      |      |      |      |       |      |      |      |      |      |      |      |
| Lab 18 | N.D.                                                                                                                                                                                                                                                                | N.D.                                                                                                                                                                                                                                                                                                                                                                                                                                                                                                                                                                                                                                                                                                                                                                                                                                                                                                                                                                                                                                                                                                                                                                                                                                                                                                                                                                                                                                                                                                                                                                                                                                                                                                                                                                                                                                                                                                                                                              | N.D.                      | N.D.                               | N.D.                      | N.D.     | N.D.               |          |                    |     |       |   |       |        |        |      |     |   |       |      |      |      |      |      |      |      |       |      |       |        |        |      |      |      |        |      |      |        |        |      |      |      |        |      |      |      |      |      |      |      |        |      |      |      |      |      |      |      |       |      |      |        |        |      |      |      |       |      |      |      |      |      |      |      |        |      |      |      |      |      |      |      |        |      |      |      |      |      |      |      |        |      |      |      |      |      |      |      |       |      |      |      |      |      |      |      |
| Lab 17 | N.D.                                                                                                                                                                                                                                                                | N.D.                                                                                                                                                                                                                                                                                                                                                                                                                                                                                                                                                                                                                                                                                                                                                                                                                                                                                                                                                                                                                                                                                                                                                                                                                                                                                                                                                                                                                                                                                                                                                                                                                                                                                                                                                                                                                                                                                                                                                              | N.D.                      | N.D.                               | N.D.                      | N.D.     | N.D.               |          |                    |     |       |   |       |        |        |      |     |   |       |      |      |      |      |      |      |      |       |      |       |        |        |      |      |      |        |      |      |        |        |      |      |      |        |      |      |      |      |      |      |      |        |      |      |      |      |      |      |      |       |      |      |        |        |      |      |      |       |      |      |      |      |      |      |      |        |      |      |      |      |      |      |      |        |      |      |      |      |      |      |      |        |      |      |      |      |      |      |      |       |      |      |      |      |      |      |      |
| Lab 10 | N.D.                                                                                                                                                                                                                                                                | N.D.                                                                                                                                                                                                                                                                                                                                                                                                                                                                                                                                                                                                                                                                                                                                                                                                                                                                                                                                                                                                                                                                                                                                                                                                                                                                                                                                                                                                                                                                                                                                                                                                                                                                                                                                                                                                                                                                                                                                                              | N.D.                      | N.D.                               | N.D.                      | N.D.     | N.D.               |          |                    |     |       |   |       |        |        |      |     |   |       |      |      |      |      |      |      |      |       |      |       |        |        |      |      |      |        |      |      |        |        |      |      |      |        |      |      |      |      |      |      |      |        |      |      |      |      |      |      |      |       |      |      |        |        |      |      |      |       |      |      |      |      |      |      |      |        |      |      |      |      |      |      |      |        |      |      |      |      |      |      |      |        |      |      |      |      |      |      |      |       |      |      |      |      |      |      |      |
| Lab 7  | N.D.                                                                                                                                                                                                                                                                | N.D.                                                                                                                                                                                                                                                                                                                                                                                                                                                                                                                                                                                                                                                                                                                                                                                                                                                                                                                                                                                                                                                                                                                                                                                                                                                                                                                                                                                                                                                                                                                                                                                                                                                                                                                                                                                                                                                                                                                                                              | N.D.                      | N.D.                               | N.D.                      | N.D.     | N.D.               |          |                    |     |       |   |       |        |        |      |     |   |       |      |      |      |      |      |      |      |       |      |       |        |        |      |      |      |        |      |      |        |        |      |      |      |        |      |      |      |      |      |      |      |        |      |      |      |      |      |      |      |       |      |      |        |        |      |      |      |       |      |      |      |      |      |      |      |        |      |      |      |      |      |      |      |        |      |      |      |      |      |      |      |        |      |      |      |      |      |      |      |       |      |      |      |      |      |      |      |

| No.    | multiple comparison procedure plot                                                                                                                                                                                                                                                | RTI details                                                                                                                                                                                                                                                                                                                                                                                                                                                                                                                                                                                                                                                                                                                                                                                                                                                                                                                                                                                                                                                                                                                                                                                                                                                                                                                                                                                                                                                                                                                                                                                                                                                                                                                                                                                                                                                                                                                                                                                                                                                                                                                                                                                                                                                                                                                                                                                                         |                           |                                    |                           |          |                    |          |                    |     |       |   |      |       |        |      |     |   |       |      |      |       |        |      |      |      |       |      |      |      |      |      |      |      |        |      |      |       |        |      |      |      |        |      |      |        |        |      |      |      |        |      |      |      |      |      |      |      |       |      |      |      |      |      |      |      |       |      |      |      |      |      |      |      |        |      |      |      |      |      |      |      |        |      |      |      |      |      |      |      |        |      |      |      |      |      |      |      |       |      |      |      |      |      |      |      |
|--------|-----------------------------------------------------------------------------------------------------------------------------------------------------------------------------------------------------------------------------------------------------------------------------------|---------------------------------------------------------------------------------------------------------------------------------------------------------------------------------------------------------------------------------------------------------------------------------------------------------------------------------------------------------------------------------------------------------------------------------------------------------------------------------------------------------------------------------------------------------------------------------------------------------------------------------------------------------------------------------------------------------------------------------------------------------------------------------------------------------------------------------------------------------------------------------------------------------------------------------------------------------------------------------------------------------------------------------------------------------------------------------------------------------------------------------------------------------------------------------------------------------------------------------------------------------------------------------------------------------------------------------------------------------------------------------------------------------------------------------------------------------------------------------------------------------------------------------------------------------------------------------------------------------------------------------------------------------------------------------------------------------------------------------------------------------------------------------------------------------------------------------------------------------------------------------------------------------------------------------------------------------------------------------------------------------------------------------------------------------------------------------------------------------------------------------------------------------------------------------------------------------------------------------------------------------------------------------------------------------------------------------------------------------------------------------------------------------------------|---------------------------|------------------------------------|---------------------------|----------|--------------------|----------|--------------------|-----|-------|---|------|-------|--------|------|-----|---|-------|------|------|-------|--------|------|------|------|-------|------|------|------|------|------|------|------|--------|------|------|-------|--------|------|------|------|--------|------|------|--------|--------|------|------|------|--------|------|------|------|------|------|------|------|-------|------|------|------|------|------|------|------|-------|------|------|------|------|------|------|------|--------|------|------|------|------|------|------|------|--------|------|------|------|------|------|------|------|--------|------|------|------|------|------|------|------|-------|------|------|------|------|------|------|------|
| (20)   | <p data-bbox="309 172 900 199"><b>Comparison of Exp. RTI values: Diethylene glycol</b></p> 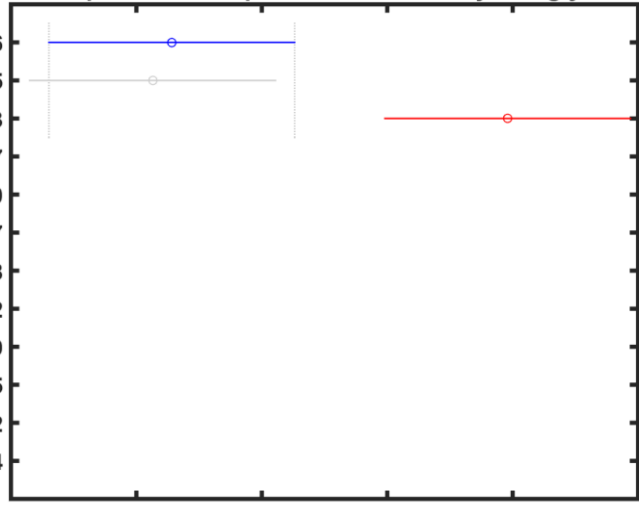 <p data-bbox="219 742 990 769">The means of groups Lab 06 and Lab 13 are significantly different</p> | <table border="1" data-bbox="1003 135 2110 614"> <thead> <tr> <th>Institute</th> <th>Level of identification confidence</th> <th>Exp. t<sub>R</sub> (min)</th> <th>Exp. RTI</th> <th>Pred. RTI</th> <th>ESI mode</th> <th>Application domain</th> <th>MCP</th> </tr> </thead> <tbody> <tr><td>Lab 6</td><td>3</td><td>1.68</td><td>28.25</td><td>111.61</td><td>+ESI</td><td>AD1</td><td>a</td></tr> <tr><td>Lab 5</td><td>3</td><td>1.93</td><td>12.93</td><td>111.61</td><td>+ESI</td><td>AD2</td><td>a</td></tr> <tr><td>Lab 4</td><td>N.D.</td><td>N.D.</td><td>N.D.</td><td>N.D.</td><td>N.D.</td><td>N.D.</td><td>N.D.</td></tr> <tr><td>Lab 12</td><td>N.D.</td><td>N.D.</td><td>N.D.</td><td>N.D.</td><td>N.D.</td><td>N.D.</td><td>N.D.</td></tr> <tr><td>Lab 13</td><td>3</td><td>8.10</td><td>296.10</td><td>111.61</td><td>+ESI</td><td>AD2</td><td>b</td></tr> <tr><td>Lab 15</td><td>N.D.</td><td>N.D.</td><td>N.D.</td><td>N.D.</td><td>N.D.</td><td>N.D.</td><td>N.D.</td></tr> <tr><td>Lab 9</td><td>N.D.</td><td>N.D.</td><td>N.D.</td><td>N.D.</td><td>N.D.</td><td>N.D.</td><td>N.D.</td></tr> <tr><td>Lab 2</td><td>N.D.</td><td>N.D.</td><td>N.D.</td><td>N.D.</td><td>N.D.</td><td>N.D.</td><td>N.D.</td></tr> <tr><td>Lab 18</td><td>N.D.</td><td>N.D.</td><td>N.D.</td><td>N.D.</td><td>N.D.</td><td>N.D.</td><td>N.D.</td></tr> <tr><td>Lab 17</td><td>N.D.</td><td>N.D.</td><td>N.D.</td><td>N.D.</td><td>N.D.</td><td>N.D.</td><td>N.D.</td></tr> <tr><td>Lab 10</td><td>N.D.</td><td>N.D.</td><td>N.D.</td><td>N.D.</td><td>N.D.</td><td>N.D.</td><td>N.D.</td></tr> <tr><td>Lab 7</td><td>N.D.</td><td>N.D.</td><td>N.D.</td><td>N.D.</td><td>N.D.</td><td>N.D.</td><td>N.D.</td></tr> </tbody> </table> <p data-bbox="1003 622 1646 646">AD1: Exp. &amp; Pred. t<sub>R</sub> are accepted for this candidate (box1)</p> <p data-bbox="1003 651 1892 678">AD2: Although there is error, exp. &amp; pred. t<sub>R</sub> are accepted for this candidate (box2)</p> <p data-bbox="1003 683 1209 710">N.D.: Not detected.</p> <p data-bbox="1003 715 2123 801">All institutes have acceptable exp. RTI values and the difference is <b>not significant at 99% CIs</b> of the calibration curve with the exception to “Antwerp”. <b>Don’t increase the level of identification confidence from 3 to 2 for this compound in “Lab 13” data! (It is most probably a false positive).</b></p> | Institute                 | Level of identification confidence | Exp. t <sub>R</sub> (min) | Exp. RTI | Pred. RTI          | ESI mode | Application domain | MCP | Lab 6 | 3 | 1.68 | 28.25 | 111.61 | +ESI | AD1 | a | Lab 5 | 3    | 1.93 | 12.93 | 111.61 | +ESI | AD2  | a    | Lab 4 | N.D. | N.D. | N.D. | N.D. | N.D. | N.D. | N.D. | Lab 12 | N.D. | N.D. | N.D.  | N.D.   | N.D. | N.D. | N.D. | Lab 13 | 3    | 8.10 | 296.10 | 111.61 | +ESI | AD2  | b    | Lab 15 | N.D. | N.D. | N.D. | N.D. | N.D. | N.D. | N.D. | Lab 9 | N.D. | N.D. | N.D. | N.D. | N.D. | N.D. | N.D. | Lab 2 | N.D. | N.D. | N.D. | N.D. | N.D. | N.D. | N.D. | Lab 18 | N.D. | N.D. | N.D. | N.D. | N.D. | N.D. | N.D. | Lab 17 | N.D. | N.D. | N.D. | N.D. | N.D. | N.D. | N.D. | Lab 10 | N.D. | N.D. | N.D. | N.D. | N.D. | N.D. | N.D. | Lab 7 | N.D. | N.D. | N.D. | N.D. | N.D. | N.D. | N.D. |
|        | Institute                                                                                                                                                                                                                                                                         | Level of identification confidence                                                                                                                                                                                                                                                                                                                                                                                                                                                                                                                                                                                                                                                                                                                                                                                                                                                                                                                                                                                                                                                                                                                                                                                                                                                                                                                                                                                                                                                                                                                                                                                                                                                                                                                                                                                                                                                                                                                                                                                                                                                                                                                                                                                                                                                                                                                                                                                  | Exp. t <sub>R</sub> (min) | Exp. RTI                           | Pred. RTI                 | ESI mode | Application domain | MCP      |                    |     |       |   |      |       |        |      |     |   |       |      |      |       |        |      |      |      |       |      |      |      |      |      |      |      |        |      |      |       |        |      |      |      |        |      |      |        |        |      |      |      |        |      |      |      |      |      |      |      |       |      |      |      |      |      |      |      |       |      |      |      |      |      |      |      |        |      |      |      |      |      |      |      |        |      |      |      |      |      |      |      |        |      |      |      |      |      |      |      |       |      |      |      |      |      |      |      |
| Lab 6  | 3                                                                                                                                                                                                                                                                                 | 1.68                                                                                                                                                                                                                                                                                                                                                                                                                                                                                                                                                                                                                                                                                                                                                                                                                                                                                                                                                                                                                                                                                                                                                                                                                                                                                                                                                                                                                                                                                                                                                                                                                                                                                                                                                                                                                                                                                                                                                                                                                                                                                                                                                                                                                                                                                                                                                                                                                | 28.25                     | 111.61                             | +ESI                      | AD1      | a                  |          |                    |     |       |   |      |       |        |      |     |   |       |      |      |       |        |      |      |      |       |      |      |      |      |      |      |      |        |      |      |       |        |      |      |      |        |      |      |        |        |      |      |      |        |      |      |      |      |      |      |      |       |      |      |      |      |      |      |      |       |      |      |      |      |      |      |      |        |      |      |      |      |      |      |      |        |      |      |      |      |      |      |      |        |      |      |      |      |      |      |      |       |      |      |      |      |      |      |      |
| Lab 5  | 3                                                                                                                                                                                                                                                                                 | 1.93                                                                                                                                                                                                                                                                                                                                                                                                                                                                                                                                                                                                                                                                                                                                                                                                                                                                                                                                                                                                                                                                                                                                                                                                                                                                                                                                                                                                                                                                                                                                                                                                                                                                                                                                                                                                                                                                                                                                                                                                                                                                                                                                                                                                                                                                                                                                                                                                                | 12.93                     | 111.61                             | +ESI                      | AD2      | a                  |          |                    |     |       |   |      |       |        |      |     |   |       |      |      |       |        |      |      |      |       |      |      |      |      |      |      |      |        |      |      |       |        |      |      |      |        |      |      |        |        |      |      |      |        |      |      |      |      |      |      |      |       |      |      |      |      |      |      |      |       |      |      |      |      |      |      |      |        |      |      |      |      |      |      |      |        |      |      |      |      |      |      |      |        |      |      |      |      |      |      |      |       |      |      |      |      |      |      |      |
| Lab 4  | N.D.                                                                                                                                                                                                                                                                              | N.D.                                                                                                                                                                                                                                                                                                                                                                                                                                                                                                                                                                                                                                                                                                                                                                                                                                                                                                                                                                                                                                                                                                                                                                                                                                                                                                                                                                                                                                                                                                                                                                                                                                                                                                                                                                                                                                                                                                                                                                                                                                                                                                                                                                                                                                                                                                                                                                                                                | N.D.                      | N.D.                               | N.D.                      | N.D.     | N.D.               |          |                    |     |       |   |      |       |        |      |     |   |       |      |      |       |        |      |      |      |       |      |      |      |      |      |      |      |        |      |      |       |        |      |      |      |        |      |      |        |        |      |      |      |        |      |      |      |      |      |      |      |       |      |      |      |      |      |      |      |       |      |      |      |      |      |      |      |        |      |      |      |      |      |      |      |        |      |      |      |      |      |      |      |        |      |      |      |      |      |      |      |       |      |      |      |      |      |      |      |
| Lab 12 | N.D.                                                                                                                                                                                                                                                                              | N.D.                                                                                                                                                                                                                                                                                                                                                                                                                                                                                                                                                                                                                                                                                                                                                                                                                                                                                                                                                                                                                                                                                                                                                                                                                                                                                                                                                                                                                                                                                                                                                                                                                                                                                                                                                                                                                                                                                                                                                                                                                                                                                                                                                                                                                                                                                                                                                                                                                | N.D.                      | N.D.                               | N.D.                      | N.D.     | N.D.               |          |                    |     |       |   |      |       |        |      |     |   |       |      |      |       |        |      |      |      |       |      |      |      |      |      |      |      |        |      |      |       |        |      |      |      |        |      |      |        |        |      |      |      |        |      |      |      |      |      |      |      |       |      |      |      |      |      |      |      |       |      |      |      |      |      |      |      |        |      |      |      |      |      |      |      |        |      |      |      |      |      |      |      |        |      |      |      |      |      |      |      |       |      |      |      |      |      |      |      |
| Lab 13 | 3                                                                                                                                                                                                                                                                                 | 8.10                                                                                                                                                                                                                                                                                                                                                                                                                                                                                                                                                                                                                                                                                                                                                                                                                                                                                                                                                                                                                                                                                                                                                                                                                                                                                                                                                                                                                                                                                                                                                                                                                                                                                                                                                                                                                                                                                                                                                                                                                                                                                                                                                                                                                                                                                                                                                                                                                | 296.10                    | 111.61                             | +ESI                      | AD2      | b                  |          |                    |     |       |   |      |       |        |      |     |   |       |      |      |       |        |      |      |      |       |      |      |      |      |      |      |      |        |      |      |       |        |      |      |      |        |      |      |        |        |      |      |      |        |      |      |      |      |      |      |      |       |      |      |      |      |      |      |      |       |      |      |      |      |      |      |      |        |      |      |      |      |      |      |      |        |      |      |      |      |      |      |      |        |      |      |      |      |      |      |      |       |      |      |      |      |      |      |      |
| Lab 15 | N.D.                                                                                                                                                                                                                                                                              | N.D.                                                                                                                                                                                                                                                                                                                                                                                                                                                                                                                                                                                                                                                                                                                                                                                                                                                                                                                                                                                                                                                                                                                                                                                                                                                                                                                                                                                                                                                                                                                                                                                                                                                                                                                                                                                                                                                                                                                                                                                                                                                                                                                                                                                                                                                                                                                                                                                                                | N.D.                      | N.D.                               | N.D.                      | N.D.     | N.D.               |          |                    |     |       |   |      |       |        |      |     |   |       |      |      |       |        |      |      |      |       |      |      |      |      |      |      |      |        |      |      |       |        |      |      |      |        |      |      |        |        |      |      |      |        |      |      |      |      |      |      |      |       |      |      |      |      |      |      |      |       |      |      |      |      |      |      |      |        |      |      |      |      |      |      |      |        |      |      |      |      |      |      |      |        |      |      |      |      |      |      |      |       |      |      |      |      |      |      |      |
| Lab 9  | N.D.                                                                                                                                                                                                                                                                              | N.D.                                                                                                                                                                                                                                                                                                                                                                                                                                                                                                                                                                                                                                                                                                                                                                                                                                                                                                                                                                                                                                                                                                                                                                                                                                                                                                                                                                                                                                                                                                                                                                                                                                                                                                                                                                                                                                                                                                                                                                                                                                                                                                                                                                                                                                                                                                                                                                                                                | N.D.                      | N.D.                               | N.D.                      | N.D.     | N.D.               |          |                    |     |       |   |      |       |        |      |     |   |       |      |      |       |        |      |      |      |       |      |      |      |      |      |      |      |        |      |      |       |        |      |      |      |        |      |      |        |        |      |      |      |        |      |      |      |      |      |      |      |       |      |      |      |      |      |      |      |       |      |      |      |      |      |      |      |        |      |      |      |      |      |      |      |        |      |      |      |      |      |      |      |        |      |      |      |      |      |      |      |       |      |      |      |      |      |      |      |
| Lab 2  | N.D.                                                                                                                                                                                                                                                                              | N.D.                                                                                                                                                                                                                                                                                                                                                                                                                                                                                                                                                                                                                                                                                                                                                                                                                                                                                                                                                                                                                                                                                                                                                                                                                                                                                                                                                                                                                                                                                                                                                                                                                                                                                                                                                                                                                                                                                                                                                                                                                                                                                                                                                                                                                                                                                                                                                                                                                | N.D.                      | N.D.                               | N.D.                      | N.D.     | N.D.               |          |                    |     |       |   |      |       |        |      |     |   |       |      |      |       |        |      |      |      |       |      |      |      |      |      |      |      |        |      |      |       |        |      |      |      |        |      |      |        |        |      |      |      |        |      |      |      |      |      |      |      |       |      |      |      |      |      |      |      |       |      |      |      |      |      |      |      |        |      |      |      |      |      |      |      |        |      |      |      |      |      |      |      |        |      |      |      |      |      |      |      |       |      |      |      |      |      |      |      |
| Lab 18 | N.D.                                                                                                                                                                                                                                                                              | N.D.                                                                                                                                                                                                                                                                                                                                                                                                                                                                                                                                                                                                                                                                                                                                                                                                                                                                                                                                                                                                                                                                                                                                                                                                                                                                                                                                                                                                                                                                                                                                                                                                                                                                                                                                                                                                                                                                                                                                                                                                                                                                                                                                                                                                                                                                                                                                                                                                                | N.D.                      | N.D.                               | N.D.                      | N.D.     | N.D.               |          |                    |     |       |   |      |       |        |      |     |   |       |      |      |       |        |      |      |      |       |      |      |      |      |      |      |      |        |      |      |       |        |      |      |      |        |      |      |        |        |      |      |      |        |      |      |      |      |      |      |      |       |      |      |      |      |      |      |      |       |      |      |      |      |      |      |      |        |      |      |      |      |      |      |      |        |      |      |      |      |      |      |      |        |      |      |      |      |      |      |      |       |      |      |      |      |      |      |      |
| Lab 17 | N.D.                                                                                                                                                                                                                                                                              | N.D.                                                                                                                                                                                                                                                                                                                                                                                                                                                                                                                                                                                                                                                                                                                                                                                                                                                                                                                                                                                                                                                                                                                                                                                                                                                                                                                                                                                                                                                                                                                                                                                                                                                                                                                                                                                                                                                                                                                                                                                                                                                                                                                                                                                                                                                                                                                                                                                                                | N.D.                      | N.D.                               | N.D.                      | N.D.     | N.D.               |          |                    |     |       |   |      |       |        |      |     |   |       |      |      |       |        |      |      |      |       |      |      |      |      |      |      |      |        |      |      |       |        |      |      |      |        |      |      |        |        |      |      |      |        |      |      |      |      |      |      |      |       |      |      |      |      |      |      |      |       |      |      |      |      |      |      |      |        |      |      |      |      |      |      |      |        |      |      |      |      |      |      |      |        |      |      |      |      |      |      |      |       |      |      |      |      |      |      |      |
| Lab 10 | N.D.                                                                                                                                                                                                                                                                              | N.D.                                                                                                                                                                                                                                                                                                                                                                                                                                                                                                                                                                                                                                                                                                                                                                                                                                                                                                                                                                                                                                                                                                                                                                                                                                                                                                                                                                                                                                                                                                                                                                                                                                                                                                                                                                                                                                                                                                                                                                                                                                                                                                                                                                                                                                                                                                                                                                                                                | N.D.                      | N.D.                               | N.D.                      | N.D.     | N.D.               |          |                    |     |       |   |      |       |        |      |     |   |       |      |      |       |        |      |      |      |       |      |      |      |      |      |      |      |        |      |      |       |        |      |      |      |        |      |      |        |        |      |      |      |        |      |      |      |      |      |      |      |       |      |      |      |      |      |      |      |       |      |      |      |      |      |      |      |        |      |      |      |      |      |      |      |        |      |      |      |      |      |      |      |        |      |      |      |      |      |      |      |       |      |      |      |      |      |      |      |
| Lab 7  | N.D.                                                                                                                                                                                                                                                                              | N.D.                                                                                                                                                                                                                                                                                                                                                                                                                                                                                                                                                                                                                                                                                                                                                                                                                                                                                                                                                                                                                                                                                                                                                                                                                                                                                                                                                                                                                                                                                                                                                                                                                                                                                                                                                                                                                                                                                                                                                                                                                                                                                                                                                                                                                                                                                                                                                                                                                | N.D.                      | N.D.                               | N.D.                      | N.D.     | N.D.               |          |                    |     |       |   |      |       |        |      |     |   |       |      |      |       |        |      |      |      |       |      |      |      |      |      |      |      |        |      |      |       |        |      |      |      |        |      |      |        |        |      |      |      |        |      |      |      |      |      |      |      |       |      |      |      |      |      |      |      |       |      |      |      |      |      |      |      |        |      |      |      |      |      |      |      |        |      |      |      |      |      |      |      |        |      |      |      |      |      |      |      |       |      |      |      |      |      |      |      |
| (21)   | <p data-bbox="376 829 878 857"><b>Comparison of Exp. RTI values: Adenine</b></p>  <p data-bbox="273 1412 990 1439">No groups have means significantly different from Lab 06</p>                 | <table border="1" data-bbox="1003 821 2110 1300"> <thead> <tr> <th>Institute</th> <th>Level of identification confidence</th> <th>Exp. t<sub>R</sub></th> <th>Exp. RTI</th> <th>Pred. RTI</th> <th>ESI mode</th> <th>Application domain</th> <th>MCP</th> </tr> </thead> <tbody> <tr><td>Lab 6</td><td>1</td><td>2.39</td><td>82.98</td><td>126.09</td><td>+ESI</td><td>AD1</td><td>a</td></tr> <tr><td>Lab 5</td><td>N.D.</td><td>N.D.</td><td>N.D.</td><td>N.D.</td><td>N.D.</td><td>N.D.</td><td>N.D.</td></tr> <tr><td>Lab 4</td><td>N.D.</td><td>N.D.</td><td>N.D.</td><td>N.D.</td><td>N.D.</td><td>N.D.</td><td>N.D.</td></tr> <tr><td>Lab 12</td><td>2a</td><td>0.69</td><td>27.96</td><td>126.09</td><td>+ESI</td><td>AD2</td><td>a</td></tr> <tr><td>Lab 13</td><td>N.D.</td><td>N.D.</td><td>N.D.</td><td>N.D.</td><td>N.D.</td><td>N.D.</td><td>N.D.</td></tr> <tr><td>Lab 15</td><td>N.D.</td><td>N.D.</td><td>N.D.</td><td>N.D.</td><td>N.D.</td><td>N.D.</td><td>N.D.</td></tr> <tr><td>Lab 9</td><td>N.D.</td><td>N.D.</td><td>N.D.</td><td>N.D.</td><td>N.D.</td><td>N.D.</td><td>N.D.</td></tr> <tr><td>Lab 2</td><td>N.D.</td><td>N.D.</td><td>N.D.</td><td>N.D.</td><td>N.D.</td><td>N.D.</td><td>N.D.</td></tr> <tr><td>Lab 18</td><td>N.D.</td><td>N.D.</td><td>N.D.</td><td>N.D.</td><td>N.D.</td><td>N.D.</td><td>N.D.</td></tr> <tr><td>Lab 17</td><td>N.D.</td><td>N.D.</td><td>N.D.</td><td>N.D.</td><td>N.D.</td><td>N.D.</td><td>N.D.</td></tr> <tr><td>Lab 10</td><td>N.D.</td><td>N.D.</td><td>N.D.</td><td>N.D.</td><td>N.D.</td><td>N.D.</td><td>N.D.</td></tr> <tr><td>Lab 7</td><td>N.D.</td><td>N.D.</td><td>N.D.</td><td>N.D.</td><td>N.D.</td><td>N.D.</td><td>N.D.</td></tr> </tbody> </table> <p data-bbox="1003 1305 1646 1332">AD1: Exp. &amp; Pred. t<sub>R</sub> are accepted for this candidate (box1)</p> <p data-bbox="1003 1337 1892 1364">AD2: Although there is error, exp. &amp; pred. t<sub>R</sub> are accepted for this candidate (box2)</p> <p data-bbox="1003 1369 1209 1396">N.D.: Not detected.</p> <p data-bbox="1003 1401 2123 1444">All institutes have acceptable exp. RTI values and the difference is <b>not significant at 99% CIs</b> of the calibration curve.</p>                                                                                                                                                                               | Institute                 | Level of identification confidence | Exp. t <sub>R</sub>       | Exp. RTI | Pred. RTI          | ESI mode | Application domain | MCP | Lab 6 | 1 | 2.39 | 82.98 | 126.09 | +ESI | AD1 | a | Lab 5 | N.D. | N.D. | N.D.  | N.D.   | N.D. | N.D. | N.D. | Lab 4 | N.D. | N.D. | N.D. | N.D. | N.D. | N.D. | N.D. | Lab 12 | 2a   | 0.69 | 27.96 | 126.09 | +ESI | AD2  | a    | Lab 13 | N.D. | N.D. | N.D.   | N.D.   | N.D. | N.D. | N.D. | Lab 15 | N.D. | N.D. | N.D. | N.D. | N.D. | N.D. | N.D. | Lab 9 | N.D. | N.D. | N.D. | N.D. | N.D. | N.D. | N.D. | Lab 2 | N.D. | N.D. | N.D. | N.D. | N.D. | N.D. | N.D. | Lab 18 | N.D. | N.D. | N.D. | N.D. | N.D. | N.D. | N.D. | Lab 17 | N.D. | N.D. | N.D. | N.D. | N.D. | N.D. | N.D. | Lab 10 | N.D. | N.D. | N.D. | N.D. | N.D. | N.D. | N.D. | Lab 7 | N.D. | N.D. | N.D. | N.D. | N.D. | N.D. | N.D. |
|        | Institute                                                                                                                                                                                                                                                                         | Level of identification confidence                                                                                                                                                                                                                                                                                                                                                                                                                                                                                                                                                                                                                                                                                                                                                                                                                                                                                                                                                                                                                                                                                                                                                                                                                                                                                                                                                                                                                                                                                                                                                                                                                                                                                                                                                                                                                                                                                                                                                                                                                                                                                                                                                                                                                                                                                                                                                                                  | Exp. t <sub>R</sub>       | Exp. RTI                           | Pred. RTI                 | ESI mode | Application domain | MCP      |                    |     |       |   |      |       |        |      |     |   |       |      |      |       |        |      |      |      |       |      |      |      |      |      |      |      |        |      |      |       |        |      |      |      |        |      |      |        |        |      |      |      |        |      |      |      |      |      |      |      |       |      |      |      |      |      |      |      |       |      |      |      |      |      |      |      |        |      |      |      |      |      |      |      |        |      |      |      |      |      |      |      |        |      |      |      |      |      |      |      |       |      |      |      |      |      |      |      |
| Lab 6  | 1                                                                                                                                                                                                                                                                                 | 2.39                                                                                                                                                                                                                                                                                                                                                                                                                                                                                                                                                                                                                                                                                                                                                                                                                                                                                                                                                                                                                                                                                                                                                                                                                                                                                                                                                                                                                                                                                                                                                                                                                                                                                                                                                                                                                                                                                                                                                                                                                                                                                                                                                                                                                                                                                                                                                                                                                | 82.98                     | 126.09                             | +ESI                      | AD1      | a                  |          |                    |     |       |   |      |       |        |      |     |   |       |      |      |       |        |      |      |      |       |      |      |      |      |      |      |      |        |      |      |       |        |      |      |      |        |      |      |        |        |      |      |      |        |      |      |      |      |      |      |      |       |      |      |      |      |      |      |      |       |      |      |      |      |      |      |      |        |      |      |      |      |      |      |      |        |      |      |      |      |      |      |      |        |      |      |      |      |      |      |      |       |      |      |      |      |      |      |      |
| Lab 5  | N.D.                                                                                                                                                                                                                                                                              | N.D.                                                                                                                                                                                                                                                                                                                                                                                                                                                                                                                                                                                                                                                                                                                                                                                                                                                                                                                                                                                                                                                                                                                                                                                                                                                                                                                                                                                                                                                                                                                                                                                                                                                                                                                                                                                                                                                                                                                                                                                                                                                                                                                                                                                                                                                                                                                                                                                                                | N.D.                      | N.D.                               | N.D.                      | N.D.     | N.D.               |          |                    |     |       |   |      |       |        |      |     |   |       |      |      |       |        |      |      |      |       |      |      |      |      |      |      |      |        |      |      |       |        |      |      |      |        |      |      |        |        |      |      |      |        |      |      |      |      |      |      |      |       |      |      |      |      |      |      |      |       |      |      |      |      |      |      |      |        |      |      |      |      |      |      |      |        |      |      |      |      |      |      |      |        |      |      |      |      |      |      |      |       |      |      |      |      |      |      |      |
| Lab 4  | N.D.                                                                                                                                                                                                                                                                              | N.D.                                                                                                                                                                                                                                                                                                                                                                                                                                                                                                                                                                                                                                                                                                                                                                                                                                                                                                                                                                                                                                                                                                                                                                                                                                                                                                                                                                                                                                                                                                                                                                                                                                                                                                                                                                                                                                                                                                                                                                                                                                                                                                                                                                                                                                                                                                                                                                                                                | N.D.                      | N.D.                               | N.D.                      | N.D.     | N.D.               |          |                    |     |       |   |      |       |        |      |     |   |       |      |      |       |        |      |      |      |       |      |      |      |      |      |      |      |        |      |      |       |        |      |      |      |        |      |      |        |        |      |      |      |        |      |      |      |      |      |      |      |       |      |      |      |      |      |      |      |       |      |      |      |      |      |      |      |        |      |      |      |      |      |      |      |        |      |      |      |      |      |      |      |        |      |      |      |      |      |      |      |       |      |      |      |      |      |      |      |
| Lab 12 | 2a                                                                                                                                                                                                                                                                                | 0.69                                                                                                                                                                                                                                                                                                                                                                                                                                                                                                                                                                                                                                                                                                                                                                                                                                                                                                                                                                                                                                                                                                                                                                                                                                                                                                                                                                                                                                                                                                                                                                                                                                                                                                                                                                                                                                                                                                                                                                                                                                                                                                                                                                                                                                                                                                                                                                                                                | 27.96                     | 126.09                             | +ESI                      | AD2      | a                  |          |                    |     |       |   |      |       |        |      |     |   |       |      |      |       |        |      |      |      |       |      |      |      |      |      |      |      |        |      |      |       |        |      |      |      |        |      |      |        |        |      |      |      |        |      |      |      |      |      |      |      |       |      |      |      |      |      |      |      |       |      |      |      |      |      |      |      |        |      |      |      |      |      |      |      |        |      |      |      |      |      |      |      |        |      |      |      |      |      |      |      |       |      |      |      |      |      |      |      |
| Lab 13 | N.D.                                                                                                                                                                                                                                                                              | N.D.                                                                                                                                                                                                                                                                                                                                                                                                                                                                                                                                                                                                                                                                                                                                                                                                                                                                                                                                                                                                                                                                                                                                                                                                                                                                                                                                                                                                                                                                                                                                                                                                                                                                                                                                                                                                                                                                                                                                                                                                                                                                                                                                                                                                                                                                                                                                                                                                                | N.D.                      | N.D.                               | N.D.                      | N.D.     | N.D.               |          |                    |     |       |   |      |       |        |      |     |   |       |      |      |       |        |      |      |      |       |      |      |      |      |      |      |      |        |      |      |       |        |      |      |      |        |      |      |        |        |      |      |      |        |      |      |      |      |      |      |      |       |      |      |      |      |      |      |      |       |      |      |      |      |      |      |      |        |      |      |      |      |      |      |      |        |      |      |      |      |      |      |      |        |      |      |      |      |      |      |      |       |      |      |      |      |      |      |      |
| Lab 15 | N.D.                                                                                                                                                                                                                                                                              | N.D.                                                                                                                                                                                                                                                                                                                                                                                                                                                                                                                                                                                                                                                                                                                                                                                                                                                                                                                                                                                                                                                                                                                                                                                                                                                                                                                                                                                                                                                                                                                                                                                                                                                                                                                                                                                                                                                                                                                                                                                                                                                                                                                                                                                                                                                                                                                                                                                                                | N.D.                      | N.D.                               | N.D.                      | N.D.     | N.D.               |          |                    |     |       |   |      |       |        |      |     |   |       |      |      |       |        |      |      |      |       |      |      |      |      |      |      |      |        |      |      |       |        |      |      |      |        |      |      |        |        |      |      |      |        |      |      |      |      |      |      |      |       |      |      |      |      |      |      |      |       |      |      |      |      |      |      |      |        |      |      |      |      |      |      |      |        |      |      |      |      |      |      |      |        |      |      |      |      |      |      |      |       |      |      |      |      |      |      |      |
| Lab 9  | N.D.                                                                                                                                                                                                                                                                              | N.D.                                                                                                                                                                                                                                                                                                                                                                                                                                                                                                                                                                                                                                                                                                                                                                                                                                                                                                                                                                                                                                                                                                                                                                                                                                                                                                                                                                                                                                                                                                                                                                                                                                                                                                                                                                                                                                                                                                                                                                                                                                                                                                                                                                                                                                                                                                                                                                                                                | N.D.                      | N.D.                               | N.D.                      | N.D.     | N.D.               |          |                    |     |       |   |      |       |        |      |     |   |       |      |      |       |        |      |      |      |       |      |      |      |      |      |      |      |        |      |      |       |        |      |      |      |        |      |      |        |        |      |      |      |        |      |      |      |      |      |      |      |       |      |      |      |      |      |      |      |       |      |      |      |      |      |      |      |        |      |      |      |      |      |      |      |        |      |      |      |      |      |      |      |        |      |      |      |      |      |      |      |       |      |      |      |      |      |      |      |
| Lab 2  | N.D.                                                                                                                                                                                                                                                                              | N.D.                                                                                                                                                                                                                                                                                                                                                                                                                                                                                                                                                                                                                                                                                                                                                                                                                                                                                                                                                                                                                                                                                                                                                                                                                                                                                                                                                                                                                                                                                                                                                                                                                                                                                                                                                                                                                                                                                                                                                                                                                                                                                                                                                                                                                                                                                                                                                                                                                | N.D.                      | N.D.                               | N.D.                      | N.D.     | N.D.               |          |                    |     |       |   |      |       |        |      |     |   |       |      |      |       |        |      |      |      |       |      |      |      |      |      |      |      |        |      |      |       |        |      |      |      |        |      |      |        |        |      |      |      |        |      |      |      |      |      |      |      |       |      |      |      |      |      |      |      |       |      |      |      |      |      |      |      |        |      |      |      |      |      |      |      |        |      |      |      |      |      |      |      |        |      |      |      |      |      |      |      |       |      |      |      |      |      |      |      |
| Lab 18 | N.D.                                                                                                                                                                                                                                                                              | N.D.                                                                                                                                                                                                                                                                                                                                                                                                                                                                                                                                                                                                                                                                                                                                                                                                                                                                                                                                                                                                                                                                                                                                                                                                                                                                                                                                                                                                                                                                                                                                                                                                                                                                                                                                                                                                                                                                                                                                                                                                                                                                                                                                                                                                                                                                                                                                                                                                                | N.D.                      | N.D.                               | N.D.                      | N.D.     | N.D.               |          |                    |     |       |   |      |       |        |      |     |   |       |      |      |       |        |      |      |      |       |      |      |      |      |      |      |      |        |      |      |       |        |      |      |      |        |      |      |        |        |      |      |      |        |      |      |      |      |      |      |      |       |      |      |      |      |      |      |      |       |      |      |      |      |      |      |      |        |      |      |      |      |      |      |      |        |      |      |      |      |      |      |      |        |      |      |      |      |      |      |      |       |      |      |      |      |      |      |      |
| Lab 17 | N.D.                                                                                                                                                                                                                                                                              | N.D.                                                                                                                                                                                                                                                                                                                                                                                                                                                                                                                                                                                                                                                                                                                                                                                                                                                                                                                                                                                                                                                                                                                                                                                                                                                                                                                                                                                                                                                                                                                                                                                                                                                                                                                                                                                                                                                                                                                                                                                                                                                                                                                                                                                                                                                                                                                                                                                                                | N.D.                      | N.D.                               | N.D.                      | N.D.     | N.D.               |          |                    |     |       |   |      |       |        |      |     |   |       |      |      |       |        |      |      |      |       |      |      |      |      |      |      |      |        |      |      |       |        |      |      |      |        |      |      |        |        |      |      |      |        |      |      |      |      |      |      |      |       |      |      |      |      |      |      |      |       |      |      |      |      |      |      |      |        |      |      |      |      |      |      |      |        |      |      |      |      |      |      |      |        |      |      |      |      |      |      |      |       |      |      |      |      |      |      |      |
| Lab 10 | N.D.                                                                                                                                                                                                                                                                              | N.D.                                                                                                                                                                                                                                                                                                                                                                                                                                                                                                                                                                                                                                                                                                                                                                                                                                                                                                                                                                                                                                                                                                                                                                                                                                                                                                                                                                                                                                                                                                                                                                                                                                                                                                                                                                                                                                                                                                                                                                                                                                                                                                                                                                                                                                                                                                                                                                                                                | N.D.                      | N.D.                               | N.D.                      | N.D.     | N.D.               |          |                    |     |       |   |      |       |        |      |     |   |       |      |      |       |        |      |      |      |       |      |      |      |      |      |      |      |        |      |      |       |        |      |      |      |        |      |      |        |        |      |      |      |        |      |      |      |      |      |      |      |       |      |      |      |      |      |      |      |       |      |      |      |      |      |      |      |        |      |      |      |      |      |      |      |        |      |      |      |      |      |      |      |        |      |      |      |      |      |      |      |       |      |      |      |      |      |      |      |
| Lab 7  | N.D.                                                                                                                                                                                                                                                                              | N.D.                                                                                                                                                                                                                                                                                                                                                                                                                                                                                                                                                                                                                                                                                                                                                                                                                                                                                                                                                                                                                                                                                                                                                                                                                                                                                                                                                                                                                                                                                                                                                                                                                                                                                                                                                                                                                                                                                                                                                                                                                                                                                                                                                                                                                                                                                                                                                                                                                | N.D.                      | N.D.                               | N.D.                      | N.D.     | N.D.               |          |                    |     |       |   |      |       |        |      |     |   |       |      |      |       |        |      |      |      |       |      |      |      |      |      |      |      |        |      |      |       |        |      |      |      |        |      |      |        |        |      |      |      |        |      |      |      |      |      |      |      |       |      |      |      |      |      |      |      |       |      |      |      |      |      |      |      |        |      |      |      |      |      |      |      |        |      |      |      |      |      |      |      |        |      |      |      |      |      |      |      |       |      |      |      |      |      |      |      |

| No.       | multiple comparison procedure plot                                                                                                                                               | RTI details                                                                                                                                                                                                                                                                                                                                                                                                                                                                                                                                                                                                                                                                                                                                                                                                                                                                                                                                                                                                                                                                                                                                                                                                                                                                                                                                                                                                                                                                                                                                                                                                                                                                                                                                                                                                                                                                                                                                                                                                                        |           |                                    |          |                    |           |          |                    |     |       |      |      |      |      |      |      |      |       |      |      |      |      |      |      |      |       |      |      |        |        |      |      |      |        |      |      |      |      |      |      |      |        |      |      |      |      |      |      |      |        |      |       |        |        |      |      |      |       |      |      |      |      |      |      |      |       |      |      |      |      |      |      |      |        |      |      |      |      |      |      |      |        |      |      |      |      |      |      |      |        |      |      |      |      |      |      |      |       |   |       |        |        |      |     |   |
|-----------|----------------------------------------------------------------------------------------------------------------------------------------------------------------------------------|------------------------------------------------------------------------------------------------------------------------------------------------------------------------------------------------------------------------------------------------------------------------------------------------------------------------------------------------------------------------------------------------------------------------------------------------------------------------------------------------------------------------------------------------------------------------------------------------------------------------------------------------------------------------------------------------------------------------------------------------------------------------------------------------------------------------------------------------------------------------------------------------------------------------------------------------------------------------------------------------------------------------------------------------------------------------------------------------------------------------------------------------------------------------------------------------------------------------------------------------------------------------------------------------------------------------------------------------------------------------------------------------------------------------------------------------------------------------------------------------------------------------------------------------------------------------------------------------------------------------------------------------------------------------------------------------------------------------------------------------------------------------------------------------------------------------------------------------------------------------------------------------------------------------------------------------------------------------------------------------------------------------------------|-----------|------------------------------------|----------|--------------------|-----------|----------|--------------------|-----|-------|------|------|------|------|------|------|------|-------|------|------|------|------|------|------|------|-------|------|------|--------|--------|------|------|------|--------|------|------|------|------|------|------|------|--------|------|------|------|------|------|------|------|--------|------|-------|--------|--------|------|------|------|-------|------|------|------|------|------|------|------|-------|------|------|------|------|------|------|------|--------|------|------|------|------|------|------|------|--------|------|------|------|------|------|------|------|--------|------|------|------|------|------|------|------|-------|---|-------|--------|--------|------|-----|---|
| (22)      | <p style="text-align: center;"><b>Comparison of Exp. RTI values: Bisphenol-S</b></p> <p style="text-align: center;">No groups have means significantly different from Lab 04</p> | <table border="1"> <thead> <tr> <th>Institute</th> <th>Level of identification confidence</th> <th>Exp. tR</th> <th>Exp. RTI</th> <th>Pred. RTI</th> <th>ESI mode</th> <th>Application domain</th> <th>MCP</th> </tr> </thead> <tbody> <tr><td>Lab 6</td><td>N.D.</td><td>N.D.</td><td>N.D.</td><td>N.D.</td><td>N.D.</td><td>N.D.</td><td>N.D.</td></tr> <tr><td>Lab 5</td><td>N.D.</td><td>N.D.</td><td>N.D.</td><td>N.D.</td><td>N.D.</td><td>N.D.</td><td>N.D.</td></tr> <tr><td>Lab 4</td><td>1</td><td>8.20</td><td>424.49</td><td>434.99</td><td>+ESI</td><td>AD1</td><td>a</td></tr> <tr><td>Lab 12</td><td>N.D.</td><td>N.D.</td><td>N.D.</td><td>N.D.</td><td>N.D.</td><td>N.D.</td><td>N.D.</td></tr> <tr><td>Lab 13</td><td>N.D.</td><td>N.D.</td><td>N.D.</td><td>N.D.</td><td>N.D.</td><td>N.D.</td><td>N.D.</td></tr> <tr><td>Lab 15</td><td>N.D.</td><td>N.D.</td><td>N.D.</td><td>N.D.</td><td>N.D.</td><td>N.D.</td><td>N.D.</td></tr> <tr><td>Lab 9</td><td>N.D.</td><td>N.D.</td><td>N.D.</td><td>N.D.</td><td>N.D.</td><td>N.D.</td><td>N.D.</td></tr> <tr><td>Lab 2</td><td>N.D.</td><td>N.D.</td><td>N.D.</td><td>N.D.</td><td>N.D.</td><td>N.D.</td><td>N.D.</td></tr> <tr><td>Lab 18</td><td>N.D.</td><td>N.D.</td><td>N.D.</td><td>N.D.</td><td>N.D.</td><td>N.D.</td><td>N.D.</td></tr> <tr><td>Lab 17</td><td>N.D.</td><td>N.D.</td><td>N.D.</td><td>N.D.</td><td>N.D.</td><td>N.D.</td><td>N.D.</td></tr> <tr><td>Lab 10</td><td>N.D.</td><td>N.D.</td><td>N.D.</td><td>N.D.</td><td>N.D.</td><td>N.D.</td><td>N.D.</td></tr> <tr><td>Lab 7</td><td>1</td><td>11.26</td><td>306.10</td><td>348.91</td><td>-ESI</td><td>AD1</td><td>a</td></tr> </tbody> </table> <p>AD1: Exp. &amp; Pred. tR are accepted for this candidate (box1)<br/> N.D.: Not detected.<br/> All institutes have acceptable exp. RTI values and the difference is <b>not significant at 99% CIs</b> of the calibration curve.</p>                                                                                                | Institute | Level of identification confidence | Exp. tR  | Exp. RTI           | Pred. RTI | ESI mode | Application domain | MCP | Lab 6 | N.D. | N.D. | N.D. | N.D. | N.D. | N.D. | N.D. | Lab 5 | N.D. | N.D. | N.D. | N.D. | N.D. | N.D. | N.D. | Lab 4 | 1    | 8.20 | 424.49 | 434.99 | +ESI | AD1  | a    | Lab 12 | N.D. | N.D. | N.D. | N.D. | N.D. | N.D. | N.D. | Lab 13 | N.D. | N.D. | N.D. | N.D. | N.D. | N.D. | N.D. | Lab 15 | N.D. | N.D.  | N.D.   | N.D.   | N.D. | N.D. | N.D. | Lab 9 | N.D. | N.D. | N.D. | N.D. | N.D. | N.D. | N.D. | Lab 2 | N.D. | N.D. | N.D. | N.D. | N.D. | N.D. | N.D. | Lab 18 | N.D. | N.D. | N.D. | N.D. | N.D. | N.D. | N.D. | Lab 17 | N.D. | N.D. | N.D. | N.D. | N.D. | N.D. | N.D. | Lab 10 | N.D. | N.D. | N.D. | N.D. | N.D. | N.D. | N.D. | Lab 7 | 1 | 11.26 | 306.10 | 348.91 | -ESI | AD1 | a |
| Institute | Level of identification confidence                                                                                                                                               | Exp. tR                                                                                                                                                                                                                                                                                                                                                                                                                                                                                                                                                                                                                                                                                                                                                                                                                                                                                                                                                                                                                                                                                                                                                                                                                                                                                                                                                                                                                                                                                                                                                                                                                                                                                                                                                                                                                                                                                                                                                                                                                            | Exp. RTI  | Pred. RTI                          | ESI mode | Application domain | MCP       |          |                    |     |       |      |      |      |      |      |      |      |       |      |      |      |      |      |      |      |       |      |      |        |        |      |      |      |        |      |      |      |      |      |      |      |        |      |      |      |      |      |      |      |        |      |       |        |        |      |      |      |       |      |      |      |      |      |      |      |       |      |      |      |      |      |      |      |        |      |      |      |      |      |      |      |        |      |      |      |      |      |      |      |        |      |      |      |      |      |      |      |       |   |       |        |        |      |     |   |
| Lab 6     | N.D.                                                                                                                                                                             | N.D.                                                                                                                                                                                                                                                                                                                                                                                                                                                                                                                                                                                                                                                                                                                                                                                                                                                                                                                                                                                                                                                                                                                                                                                                                                                                                                                                                                                                                                                                                                                                                                                                                                                                                                                                                                                                                                                                                                                                                                                                                               | N.D.      | N.D.                               | N.D.     | N.D.               | N.D.      |          |                    |     |       |      |      |      |      |      |      |      |       |      |      |      |      |      |      |      |       |      |      |        |        |      |      |      |        |      |      |      |      |      |      |      |        |      |      |      |      |      |      |      |        |      |       |        |        |      |      |      |       |      |      |      |      |      |      |      |       |      |      |      |      |      |      |      |        |      |      |      |      |      |      |      |        |      |      |      |      |      |      |      |        |      |      |      |      |      |      |      |       |   |       |        |        |      |     |   |
| Lab 5     | N.D.                                                                                                                                                                             | N.D.                                                                                                                                                                                                                                                                                                                                                                                                                                                                                                                                                                                                                                                                                                                                                                                                                                                                                                                                                                                                                                                                                                                                                                                                                                                                                                                                                                                                                                                                                                                                                                                                                                                                                                                                                                                                                                                                                                                                                                                                                               | N.D.      | N.D.                               | N.D.     | N.D.               | N.D.      |          |                    |     |       |      |      |      |      |      |      |      |       |      |      |      |      |      |      |      |       |      |      |        |        |      |      |      |        |      |      |      |      |      |      |      |        |      |      |      |      |      |      |      |        |      |       |        |        |      |      |      |       |      |      |      |      |      |      |      |       |      |      |      |      |      |      |      |        |      |      |      |      |      |      |      |        |      |      |      |      |      |      |      |        |      |      |      |      |      |      |      |       |   |       |        |        |      |     |   |
| Lab 4     | 1                                                                                                                                                                                | 8.20                                                                                                                                                                                                                                                                                                                                                                                                                                                                                                                                                                                                                                                                                                                                                                                                                                                                                                                                                                                                                                                                                                                                                                                                                                                                                                                                                                                                                                                                                                                                                                                                                                                                                                                                                                                                                                                                                                                                                                                                                               | 424.49    | 434.99                             | +ESI     | AD1                | a         |          |                    |     |       |      |      |      |      |      |      |      |       |      |      |      |      |      |      |      |       |      |      |        |        |      |      |      |        |      |      |      |      |      |      |      |        |      |      |      |      |      |      |      |        |      |       |        |        |      |      |      |       |      |      |      |      |      |      |      |       |      |      |      |      |      |      |      |        |      |      |      |      |      |      |      |        |      |      |      |      |      |      |      |        |      |      |      |      |      |      |      |       |   |       |        |        |      |     |   |
| Lab 12    | N.D.                                                                                                                                                                             | N.D.                                                                                                                                                                                                                                                                                                                                                                                                                                                                                                                                                                                                                                                                                                                                                                                                                                                                                                                                                                                                                                                                                                                                                                                                                                                                                                                                                                                                                                                                                                                                                                                                                                                                                                                                                                                                                                                                                                                                                                                                                               | N.D.      | N.D.                               | N.D.     | N.D.               | N.D.      |          |                    |     |       |      |      |      |      |      |      |      |       |      |      |      |      |      |      |      |       |      |      |        |        |      |      |      |        |      |      |      |      |      |      |      |        |      |      |      |      |      |      |      |        |      |       |        |        |      |      |      |       |      |      |      |      |      |      |      |       |      |      |      |      |      |      |      |        |      |      |      |      |      |      |      |        |      |      |      |      |      |      |      |        |      |      |      |      |      |      |      |       |   |       |        |        |      |     |   |
| Lab 13    | N.D.                                                                                                                                                                             | N.D.                                                                                                                                                                                                                                                                                                                                                                                                                                                                                                                                                                                                                                                                                                                                                                                                                                                                                                                                                                                                                                                                                                                                                                                                                                                                                                                                                                                                                                                                                                                                                                                                                                                                                                                                                                                                                                                                                                                                                                                                                               | N.D.      | N.D.                               | N.D.     | N.D.               | N.D.      |          |                    |     |       |      |      |      |      |      |      |      |       |      |      |      |      |      |      |      |       |      |      |        |        |      |      |      |        |      |      |      |      |      |      |      |        |      |      |      |      |      |      |      |        |      |       |        |        |      |      |      |       |      |      |      |      |      |      |      |       |      |      |      |      |      |      |      |        |      |      |      |      |      |      |      |        |      |      |      |      |      |      |      |        |      |      |      |      |      |      |      |       |   |       |        |        |      |     |   |
| Lab 15    | N.D.                                                                                                                                                                             | N.D.                                                                                                                                                                                                                                                                                                                                                                                                                                                                                                                                                                                                                                                                                                                                                                                                                                                                                                                                                                                                                                                                                                                                                                                                                                                                                                                                                                                                                                                                                                                                                                                                                                                                                                                                                                                                                                                                                                                                                                                                                               | N.D.      | N.D.                               | N.D.     | N.D.               | N.D.      |          |                    |     |       |      |      |      |      |      |      |      |       |      |      |      |      |      |      |      |       |      |      |        |        |      |      |      |        |      |      |      |      |      |      |      |        |      |      |      |      |      |      |      |        |      |       |        |        |      |      |      |       |      |      |      |      |      |      |      |       |      |      |      |      |      |      |      |        |      |      |      |      |      |      |      |        |      |      |      |      |      |      |      |        |      |      |      |      |      |      |      |       |   |       |        |        |      |     |   |
| Lab 9     | N.D.                                                                                                                                                                             | N.D.                                                                                                                                                                                                                                                                                                                                                                                                                                                                                                                                                                                                                                                                                                                                                                                                                                                                                                                                                                                                                                                                                                                                                                                                                                                                                                                                                                                                                                                                                                                                                                                                                                                                                                                                                                                                                                                                                                                                                                                                                               | N.D.      | N.D.                               | N.D.     | N.D.               | N.D.      |          |                    |     |       |      |      |      |      |      |      |      |       |      |      |      |      |      |      |      |       |      |      |        |        |      |      |      |        |      |      |      |      |      |      |      |        |      |      |      |      |      |      |      |        |      |       |        |        |      |      |      |       |      |      |      |      |      |      |      |       |      |      |      |      |      |      |      |        |      |      |      |      |      |      |      |        |      |      |      |      |      |      |      |        |      |      |      |      |      |      |      |       |   |       |        |        |      |     |   |
| Lab 2     | N.D.                                                                                                                                                                             | N.D.                                                                                                                                                                                                                                                                                                                                                                                                                                                                                                                                                                                                                                                                                                                                                                                                                                                                                                                                                                                                                                                                                                                                                                                                                                                                                                                                                                                                                                                                                                                                                                                                                                                                                                                                                                                                                                                                                                                                                                                                                               | N.D.      | N.D.                               | N.D.     | N.D.               | N.D.      |          |                    |     |       |      |      |      |      |      |      |      |       |      |      |      |      |      |      |      |       |      |      |        |        |      |      |      |        |      |      |      |      |      |      |      |        |      |      |      |      |      |      |      |        |      |       |        |        |      |      |      |       |      |      |      |      |      |      |      |       |      |      |      |      |      |      |      |        |      |      |      |      |      |      |      |        |      |      |      |      |      |      |      |        |      |      |      |      |      |      |      |       |   |       |        |        |      |     |   |
| Lab 18    | N.D.                                                                                                                                                                             | N.D.                                                                                                                                                                                                                                                                                                                                                                                                                                                                                                                                                                                                                                                                                                                                                                                                                                                                                                                                                                                                                                                                                                                                                                                                                                                                                                                                                                                                                                                                                                                                                                                                                                                                                                                                                                                                                                                                                                                                                                                                                               | N.D.      | N.D.                               | N.D.     | N.D.               | N.D.      |          |                    |     |       |      |      |      |      |      |      |      |       |      |      |      |      |      |      |      |       |      |      |        |        |      |      |      |        |      |      |      |      |      |      |      |        |      |      |      |      |      |      |      |        |      |       |        |        |      |      |      |       |      |      |      |      |      |      |      |       |      |      |      |      |      |      |      |        |      |      |      |      |      |      |      |        |      |      |      |      |      |      |      |        |      |      |      |      |      |      |      |       |   |       |        |        |      |     |   |
| Lab 17    | N.D.                                                                                                                                                                             | N.D.                                                                                                                                                                                                                                                                                                                                                                                                                                                                                                                                                                                                                                                                                                                                                                                                                                                                                                                                                                                                                                                                                                                                                                                                                                                                                                                                                                                                                                                                                                                                                                                                                                                                                                                                                                                                                                                                                                                                                                                                                               | N.D.      | N.D.                               | N.D.     | N.D.               | N.D.      |          |                    |     |       |      |      |      |      |      |      |      |       |      |      |      |      |      |      |      |       |      |      |        |        |      |      |      |        |      |      |      |      |      |      |      |        |      |      |      |      |      |      |      |        |      |       |        |        |      |      |      |       |      |      |      |      |      |      |      |       |      |      |      |      |      |      |      |        |      |      |      |      |      |      |      |        |      |      |      |      |      |      |      |        |      |      |      |      |      |      |      |       |   |       |        |        |      |     |   |
| Lab 10    | N.D.                                                                                                                                                                             | N.D.                                                                                                                                                                                                                                                                                                                                                                                                                                                                                                                                                                                                                                                                                                                                                                                                                                                                                                                                                                                                                                                                                                                                                                                                                                                                                                                                                                                                                                                                                                                                                                                                                                                                                                                                                                                                                                                                                                                                                                                                                               | N.D.      | N.D.                               | N.D.     | N.D.               | N.D.      |          |                    |     |       |      |      |      |      |      |      |      |       |      |      |      |      |      |      |      |       |      |      |        |        |      |      |      |        |      |      |      |      |      |      |      |        |      |      |      |      |      |      |      |        |      |       |        |        |      |      |      |       |      |      |      |      |      |      |      |       |      |      |      |      |      |      |      |        |      |      |      |      |      |      |      |        |      |      |      |      |      |      |      |        |      |      |      |      |      |      |      |       |   |       |        |        |      |     |   |
| Lab 7     | 1                                                                                                                                                                                | 11.26                                                                                                                                                                                                                                                                                                                                                                                                                                                                                                                                                                                                                                                                                                                                                                                                                                                                                                                                                                                                                                                                                                                                                                                                                                                                                                                                                                                                                                                                                                                                                                                                                                                                                                                                                                                                                                                                                                                                                                                                                              | 306.10    | 348.91                             | -ESI     | AD1                | a         |          |                    |     |       |      |      |      |      |      |      |      |       |      |      |      |      |      |      |      |       |      |      |        |        |      |      |      |        |      |      |      |      |      |      |      |        |      |      |      |      |      |      |      |        |      |       |        |        |      |      |      |       |      |      |      |      |      |      |      |       |      |      |      |      |      |      |      |        |      |      |      |      |      |      |      |        |      |      |      |      |      |      |      |        |      |      |      |      |      |      |      |       |   |       |        |        |      |     |   |
| (23)      | <p style="text-align: center;"><b>Comparison of Exp. RTI values: Triclosan</b></p> <p style="text-align: center;">No groups have means significantly different from Lab 15</p>   | <table border="1"> <thead> <tr> <th>Institute</th> <th>Level of identification confidence</th> <th>Exp. tR</th> <th>Exp. RTI</th> <th>Pred. RTI</th> <th>ESI mode</th> <th>Application domain</th> <th>MCP</th> </tr> </thead> <tbody> <tr><td>Lab 6</td><td>N.D.</td><td>N.D.</td><td>N.D.</td><td>N.D.</td><td>N.D.</td><td>N.D.</td><td>N.D.</td></tr> <tr><td>Lab 5</td><td>N.D.</td><td>N.D.</td><td>N.D.</td><td>N.D.</td><td>N.D.</td><td>N.D.</td><td>N.D.</td></tr> <tr><td>Lab 4</td><td>N.D.</td><td>N.D.</td><td>N.D.</td><td>N.D.</td><td>N.D.</td><td>N.D.</td><td>N.D.</td></tr> <tr><td>Lab 12</td><td>N.D.</td><td>N.D.</td><td>N.D.</td><td>N.D.</td><td>N.D.</td><td>N.D.</td><td>N.D.</td></tr> <tr><td>Lab 13</td><td>N.D.</td><td>N.D.</td><td>N.D.</td><td>N.D.</td><td>N.D.</td><td>N.D.</td><td>N.D.</td></tr> <tr><td>Lab 15</td><td>1</td><td>10.45</td><td>766.98</td><td>788.08</td><td>-ESI</td><td>AD1</td><td>a</td></tr> <tr><td>Lab 9</td><td>N.D.</td><td>N.D.</td><td>N.D.</td><td>N.D.</td><td>N.D.</td><td>N.D.</td><td>N.D.</td></tr> <tr><td>Lab 2</td><td>N.D.</td><td>N.D.</td><td>N.D.</td><td>N.D.</td><td>N.D.</td><td>N.D.</td><td>N.D.</td></tr> <tr><td>Lab 18</td><td>N.D.</td><td>N.D.</td><td>N.D.</td><td>N.D.</td><td>N.D.</td><td>N.D.</td><td>N.D.</td></tr> <tr><td>Lab 17</td><td>N.D.</td><td>N.D.</td><td>N.D.</td><td>N.D.</td><td>N.D.</td><td>N.D.</td><td>N.D.</td></tr> <tr><td>Lab 10</td><td>N.D.</td><td>N.D.</td><td>N.D.</td><td>N.D.</td><td>N.D.</td><td>N.D.</td><td>N.D.</td></tr> <tr><td>Lab 7</td><td>2</td><td>17.40</td><td>581.51</td><td>788.08</td><td>-ESI</td><td>AD3</td><td>a</td></tr> </tbody> </table> <p>AD1: Exp. &amp; Pred. tR are accepted for this candidate (box1)<br/> AD3: Pred./Exp. tR are not reliable (high SR; use other verification tools (box3))<br/> N.D.: Not detected.<br/> Note: All institutes have acceptable exp. RTI values and the difference is <b>not significant at 99% CIs</b> of the calibration curve.</p> | Institute | Level of identification confidence | Exp. tR  | Exp. RTI           | Pred. RTI | ESI mode | Application domain | MCP | Lab 6 | N.D. | N.D. | N.D. | N.D. | N.D. | N.D. | N.D. | Lab 5 | N.D. | N.D. | N.D. | N.D. | N.D. | N.D. | N.D. | Lab 4 | N.D. | N.D. | N.D.   | N.D.   | N.D. | N.D. | N.D. | Lab 12 | N.D. | N.D. | N.D. | N.D. | N.D. | N.D. | N.D. | Lab 13 | N.D. | N.D. | N.D. | N.D. | N.D. | N.D. | N.D. | Lab 15 | 1    | 10.45 | 766.98 | 788.08 | -ESI | AD1  | a    | Lab 9 | N.D. | N.D. | N.D. | N.D. | N.D. | N.D. | N.D. | Lab 2 | N.D. | N.D. | N.D. | N.D. | N.D. | N.D. | N.D. | Lab 18 | N.D. | N.D. | N.D. | N.D. | N.D. | N.D. | N.D. | Lab 17 | N.D. | N.D. | N.D. | N.D. | N.D. | N.D. | N.D. | Lab 10 | N.D. | N.D. | N.D. | N.D. | N.D. | N.D. | N.D. | Lab 7 | 2 | 17.40 | 581.51 | 788.08 | -ESI | AD3 | a |
| Institute | Level of identification confidence                                                                                                                                               | Exp. tR                                                                                                                                                                                                                                                                                                                                                                                                                                                                                                                                                                                                                                                                                                                                                                                                                                                                                                                                                                                                                                                                                                                                                                                                                                                                                                                                                                                                                                                                                                                                                                                                                                                                                                                                                                                                                                                                                                                                                                                                                            | Exp. RTI  | Pred. RTI                          | ESI mode | Application domain | MCP       |          |                    |     |       |      |      |      |      |      |      |      |       |      |      |      |      |      |      |      |       |      |      |        |        |      |      |      |        |      |      |      |      |      |      |      |        |      |      |      |      |      |      |      |        |      |       |        |        |      |      |      |       |      |      |      |      |      |      |      |       |      |      |      |      |      |      |      |        |      |      |      |      |      |      |      |        |      |      |      |      |      |      |      |        |      |      |      |      |      |      |      |       |   |       |        |        |      |     |   |
| Lab 6     | N.D.                                                                                                                                                                             | N.D.                                                                                                                                                                                                                                                                                                                                                                                                                                                                                                                                                                                                                                                                                                                                                                                                                                                                                                                                                                                                                                                                                                                                                                                                                                                                                                                                                                                                                                                                                                                                                                                                                                                                                                                                                                                                                                                                                                                                                                                                                               | N.D.      | N.D.                               | N.D.     | N.D.               | N.D.      |          |                    |     |       |      |      |      |      |      |      |      |       |      |      |      |      |      |      |      |       |      |      |        |        |      |      |      |        |      |      |      |      |      |      |      |        |      |      |      |      |      |      |      |        |      |       |        |        |      |      |      |       |      |      |      |      |      |      |      |       |      |      |      |      |      |      |      |        |      |      |      |      |      |      |      |        |      |      |      |      |      |      |      |        |      |      |      |      |      |      |      |       |   |       |        |        |      |     |   |
| Lab 5     | N.D.                                                                                                                                                                             | N.D.                                                                                                                                                                                                                                                                                                                                                                                                                                                                                                                                                                                                                                                                                                                                                                                                                                                                                                                                                                                                                                                                                                                                                                                                                                                                                                                                                                                                                                                                                                                                                                                                                                                                                                                                                                                                                                                                                                                                                                                                                               | N.D.      | N.D.                               | N.D.     | N.D.               | N.D.      |          |                    |     |       |      |      |      |      |      |      |      |       |      |      |      |      |      |      |      |       |      |      |        |        |      |      |      |        |      |      |      |      |      |      |      |        |      |      |      |      |      |      |      |        |      |       |        |        |      |      |      |       |      |      |      |      |      |      |      |       |      |      |      |      |      |      |      |        |      |      |      |      |      |      |      |        |      |      |      |      |      |      |      |        |      |      |      |      |      |      |      |       |   |       |        |        |      |     |   |
| Lab 4     | N.D.                                                                                                                                                                             | N.D.                                                                                                                                                                                                                                                                                                                                                                                                                                                                                                                                                                                                                                                                                                                                                                                                                                                                                                                                                                                                                                                                                                                                                                                                                                                                                                                                                                                                                                                                                                                                                                                                                                                                                                                                                                                                                                                                                                                                                                                                                               | N.D.      | N.D.                               | N.D.     | N.D.               | N.D.      |          |                    |     |       |      |      |      |      |      |      |      |       |      |      |      |      |      |      |      |       |      |      |        |        |      |      |      |        |      |      |      |      |      |      |      |        |      |      |      |      |      |      |      |        |      |       |        |        |      |      |      |       |      |      |      |      |      |      |      |       |      |      |      |      |      |      |      |        |      |      |      |      |      |      |      |        |      |      |      |      |      |      |      |        |      |      |      |      |      |      |      |       |   |       |        |        |      |     |   |
| Lab 12    | N.D.                                                                                                                                                                             | N.D.                                                                                                                                                                                                                                                                                                                                                                                                                                                                                                                                                                                                                                                                                                                                                                                                                                                                                                                                                                                                                                                                                                                                                                                                                                                                                                                                                                                                                                                                                                                                                                                                                                                                                                                                                                                                                                                                                                                                                                                                                               | N.D.      | N.D.                               | N.D.     | N.D.               | N.D.      |          |                    |     |       |      |      |      |      |      |      |      |       |      |      |      |      |      |      |      |       |      |      |        |        |      |      |      |        |      |      |      |      |      |      |      |        |      |      |      |      |      |      |      |        |      |       |        |        |      |      |      |       |      |      |      |      |      |      |      |       |      |      |      |      |      |      |      |        |      |      |      |      |      |      |      |        |      |      |      |      |      |      |      |        |      |      |      |      |      |      |      |       |   |       |        |        |      |     |   |
| Lab 13    | N.D.                                                                                                                                                                             | N.D.                                                                                                                                                                                                                                                                                                                                                                                                                                                                                                                                                                                                                                                                                                                                                                                                                                                                                                                                                                                                                                                                                                                                                                                                                                                                                                                                                                                                                                                                                                                                                                                                                                                                                                                                                                                                                                                                                                                                                                                                                               | N.D.      | N.D.                               | N.D.     | N.D.               | N.D.      |          |                    |     |       |      |      |      |      |      |      |      |       |      |      |      |      |      |      |      |       |      |      |        |        |      |      |      |        |      |      |      |      |      |      |      |        |      |      |      |      |      |      |      |        |      |       |        |        |      |      |      |       |      |      |      |      |      |      |      |       |      |      |      |      |      |      |      |        |      |      |      |      |      |      |      |        |      |      |      |      |      |      |      |        |      |      |      |      |      |      |      |       |   |       |        |        |      |     |   |
| Lab 15    | 1                                                                                                                                                                                | 10.45                                                                                                                                                                                                                                                                                                                                                                                                                                                                                                                                                                                                                                                                                                                                                                                                                                                                                                                                                                                                                                                                                                                                                                                                                                                                                                                                                                                                                                                                                                                                                                                                                                                                                                                                                                                                                                                                                                                                                                                                                              | 766.98    | 788.08                             | -ESI     | AD1                | a         |          |                    |     |       |      |      |      |      |      |      |      |       |      |      |      |      |      |      |      |       |      |      |        |        |      |      |      |        |      |      |      |      |      |      |      |        |      |      |      |      |      |      |      |        |      |       |        |        |      |      |      |       |      |      |      |      |      |      |      |       |      |      |      |      |      |      |      |        |      |      |      |      |      |      |      |        |      |      |      |      |      |      |      |        |      |      |      |      |      |      |      |       |   |       |        |        |      |     |   |
| Lab 9     | N.D.                                                                                                                                                                             | N.D.                                                                                                                                                                                                                                                                                                                                                                                                                                                                                                                                                                                                                                                                                                                                                                                                                                                                                                                                                                                                                                                                                                                                                                                                                                                                                                                                                                                                                                                                                                                                                                                                                                                                                                                                                                                                                                                                                                                                                                                                                               | N.D.      | N.D.                               | N.D.     | N.D.               | N.D.      |          |                    |     |       |      |      |      |      |      |      |      |       |      |      |      |      |      |      |      |       |      |      |        |        |      |      |      |        |      |      |      |      |      |      |      |        |      |      |      |      |      |      |      |        |      |       |        |        |      |      |      |       |      |      |      |      |      |      |      |       |      |      |      |      |      |      |      |        |      |      |      |      |      |      |      |        |      |      |      |      |      |      |      |        |      |      |      |      |      |      |      |       |   |       |        |        |      |     |   |
| Lab 2     | N.D.                                                                                                                                                                             | N.D.                                                                                                                                                                                                                                                                                                                                                                                                                                                                                                                                                                                                                                                                                                                                                                                                                                                                                                                                                                                                                                                                                                                                                                                                                                                                                                                                                                                                                                                                                                                                                                                                                                                                                                                                                                                                                                                                                                                                                                                                                               | N.D.      | N.D.                               | N.D.     | N.D.               | N.D.      |          |                    |     |       |      |      |      |      |      |      |      |       |      |      |      |      |      |      |      |       |      |      |        |        |      |      |      |        |      |      |      |      |      |      |      |        |      |      |      |      |      |      |      |        |      |       |        |        |      |      |      |       |      |      |      |      |      |      |      |       |      |      |      |      |      |      |      |        |      |      |      |      |      |      |      |        |      |      |      |      |      |      |      |        |      |      |      |      |      |      |      |       |   |       |        |        |      |     |   |
| Lab 18    | N.D.                                                                                                                                                                             | N.D.                                                                                                                                                                                                                                                                                                                                                                                                                                                                                                                                                                                                                                                                                                                                                                                                                                                                                                                                                                                                                                                                                                                                                                                                                                                                                                                                                                                                                                                                                                                                                                                                                                                                                                                                                                                                                                                                                                                                                                                                                               | N.D.      | N.D.                               | N.D.     | N.D.               | N.D.      |          |                    |     |       |      |      |      |      |      |      |      |       |      |      |      |      |      |      |      |       |      |      |        |        |      |      |      |        |      |      |      |      |      |      |      |        |      |      |      |      |      |      |      |        |      |       |        |        |      |      |      |       |      |      |      |      |      |      |      |       |      |      |      |      |      |      |      |        |      |      |      |      |      |      |      |        |      |      |      |      |      |      |      |        |      |      |      |      |      |      |      |       |   |       |        |        |      |     |   |
| Lab 17    | N.D.                                                                                                                                                                             | N.D.                                                                                                                                                                                                                                                                                                                                                                                                                                                                                                                                                                                                                                                                                                                                                                                                                                                                                                                                                                                                                                                                                                                                                                                                                                                                                                                                                                                                                                                                                                                                                                                                                                                                                                                                                                                                                                                                                                                                                                                                                               | N.D.      | N.D.                               | N.D.     | N.D.               | N.D.      |          |                    |     |       |      |      |      |      |      |      |      |       |      |      |      |      |      |      |      |       |      |      |        |        |      |      |      |        |      |      |      |      |      |      |      |        |      |      |      |      |      |      |      |        |      |       |        |        |      |      |      |       |      |      |      |      |      |      |      |       |      |      |      |      |      |      |      |        |      |      |      |      |      |      |      |        |      |      |      |      |      |      |      |        |      |      |      |      |      |      |      |       |   |       |        |        |      |     |   |
| Lab 10    | N.D.                                                                                                                                                                             | N.D.                                                                                                                                                                                                                                                                                                                                                                                                                                                                                                                                                                                                                                                                                                                                                                                                                                                                                                                                                                                                                                                                                                                                                                                                                                                                                                                                                                                                                                                                                                                                                                                                                                                                                                                                                                                                                                                                                                                                                                                                                               | N.D.      | N.D.                               | N.D.     | N.D.               | N.D.      |          |                    |     |       |      |      |      |      |      |      |      |       |      |      |      |      |      |      |      |       |      |      |        |        |      |      |      |        |      |      |      |      |      |      |      |        |      |      |      |      |      |      |      |        |      |       |        |        |      |      |      |       |      |      |      |      |      |      |      |       |      |      |      |      |      |      |      |        |      |      |      |      |      |      |      |        |      |      |      |      |      |      |      |        |      |      |      |      |      |      |      |       |   |       |        |        |      |     |   |
| Lab 7     | 2                                                                                                                                                                                | 17.40                                                                                                                                                                                                                                                                                                                                                                                                                                                                                                                                                                                                                                                                                                                                                                                                                                                                                                                                                                                                                                                                                                                                                                                                                                                                                                                                                                                                                                                                                                                                                                                                                                                                                                                                                                                                                                                                                                                                                                                                                              | 581.51    | 788.08                             | -ESI     | AD3                | a         |          |                    |     |       |      |      |      |      |      |      |      |       |      |      |      |      |      |      |      |       |      |      |        |        |      |      |      |        |      |      |      |      |      |      |      |        |      |      |      |      |      |      |      |        |      |       |        |        |      |      |      |       |      |      |      |      |      |      |      |       |      |      |      |      |      |      |      |        |      |      |      |      |      |      |      |        |      |      |      |      |      |      |      |        |      |      |      |      |      |      |      |       |   |       |        |        |      |     |   |

| No.       | multiple comparison procedure plot                                                                                                                                              | RTI details                                                                                                                                                                                                                                                                                                                                                                                                                                                                                                                                                                                                                                                                                                                                                                                                                                                                                                                                                                                                                                                                                                                                                                                                                                                                                                                                                                                                                                                                                                                                                                                                                                                                                                                                                                                                                                                                                                                                                                                                                                                                      |           |                                    |          |                    |           |          |                    |     |       |      |      |      |      |      |      |      |       |      |      |      |      |      |      |      |       |      |      |      |      |      |      |      |        |      |      |      |      |      |      |      |        |      |       |        |        |      |      |      |        |      |       |        |        |      |      |      |       |      |      |      |      |      |      |      |       |   |       |         |        |      |     |   |        |      |       |        |        |      |      |      |        |      |      |      |      |      |      |      |        |      |      |      |      |      |      |      |       |      |       |        |        |      |      |      |
|-----------|---------------------------------------------------------------------------------------------------------------------------------------------------------------------------------|----------------------------------------------------------------------------------------------------------------------------------------------------------------------------------------------------------------------------------------------------------------------------------------------------------------------------------------------------------------------------------------------------------------------------------------------------------------------------------------------------------------------------------------------------------------------------------------------------------------------------------------------------------------------------------------------------------------------------------------------------------------------------------------------------------------------------------------------------------------------------------------------------------------------------------------------------------------------------------------------------------------------------------------------------------------------------------------------------------------------------------------------------------------------------------------------------------------------------------------------------------------------------------------------------------------------------------------------------------------------------------------------------------------------------------------------------------------------------------------------------------------------------------------------------------------------------------------------------------------------------------------------------------------------------------------------------------------------------------------------------------------------------------------------------------------------------------------------------------------------------------------------------------------------------------------------------------------------------------------------------------------------------------------------------------------------------------|-----------|------------------------------------|----------|--------------------|-----------|----------|--------------------|-----|-------|------|------|------|------|------|------|------|-------|------|------|------|------|------|------|------|-------|------|------|------|------|------|------|------|--------|------|------|------|------|------|------|------|--------|------|-------|--------|--------|------|------|------|--------|------|-------|--------|--------|------|------|------|-------|------|------|------|------|------|------|------|-------|---|-------|---------|--------|------|-----|---|--------|------|-------|--------|--------|------|------|------|--------|------|------|------|------|------|------|------|--------|------|------|------|------|------|------|------|-------|------|-------|--------|--------|------|------|------|
| (24)      | <p style="text-align: center;"><b>Comparison of Exp. RTI values: Stearamide</b></p> <p style="text-align: center;">No groups have means significantly different from Lab 02</p> | <table border="1"> <thead> <tr> <th>Institute</th> <th>Level of identification confidence</th> <th>Exp. tR</th> <th>Exp. RTI</th> <th>Pred. RTI</th> <th>ESI mode</th> <th>Application domain</th> <th>MCP</th> </tr> </thead> <tbody> <tr><td>Lab 6</td><td>N.D.</td><td>N.D.</td><td>N.D.</td><td>N.D.</td><td>N.D.</td><td>N.D.</td><td>N.D.</td></tr> <tr><td>Lab 5</td><td>N.D.</td><td>N.D.</td><td>N.D.</td><td>N.D.</td><td>N.D.</td><td>N.D.</td><td>N.D.</td></tr> <tr><td>Lab 4</td><td>N.D.</td><td>N.D.</td><td>N.D.</td><td>N.D.</td><td>N.D.</td><td>N.D.</td><td>N.D.</td></tr> <tr><td>Lab 12</td><td>N.D.</td><td>N.D.</td><td>N.D.</td><td>N.D.</td><td>N.D.</td><td>N.D.</td><td>N.D.</td></tr> <tr><td>Lab 13</td><td>N.D.</td><td>N.D.</td><td>N.D.</td><td>N.D.</td><td>N.D.</td><td>N.D.</td><td>N.D.</td></tr> <tr><td>Lab 15</td><td>N.D.</td><td>N.D.</td><td>N.D.</td><td>N.D.</td><td>N.D.</td><td>N.D.</td><td>N.D.</td></tr> <tr><td>Lab 9</td><td>N.D.</td><td>N.D.</td><td>N.D.</td><td>N.D.</td><td>N.D.</td><td>N.D.</td><td>N.D.</td></tr> <tr><td>Lab 2</td><td>2</td><td>46.27</td><td>1010.34</td><td>882.75</td><td>+ESI</td><td>AD2</td><td>a</td></tr> <tr><td>Lab 18</td><td>N.D.</td><td>N.D.</td><td>N.D.</td><td>N.D.</td><td>N.D.</td><td>N.D.</td><td>N.D.</td></tr> <tr><td>Lab 17</td><td>N.D.</td><td>N.D.</td><td>N.D.</td><td>N.D.</td><td>N.D.</td><td>N.D.</td><td>N.D.</td></tr> <tr><td>Lab 10</td><td>N.D.</td><td>N.D.</td><td>N.D.</td><td>N.D.</td><td>N.D.</td><td>N.D.</td><td>N.D.</td></tr> <tr><td>Lab 7</td><td>2</td><td>21.00</td><td>912.07</td><td>882.75</td><td>+ESI</td><td>AD1</td><td>a</td></tr> </tbody> </table> <p>AD1: Exp. &amp; Pred. tR are accepted for this candidate (box1)<br/> AD2: Although there is error, exp. &amp; pred. tR are accepted for this candidate (box2)<br/> N.D.: Not detected.<br/> All institutes have acceptable exp. RTI values and the difference is <b>not significant at 99% CIs</b> of the calibration curve.</p>                                              | Institute | Level of identification confidence | Exp. tR  | Exp. RTI           | Pred. RTI | ESI mode | Application domain | MCP | Lab 6 | N.D. | N.D. | N.D. | N.D. | N.D. | N.D. | N.D. | Lab 5 | N.D. | N.D. | N.D. | N.D. | N.D. | N.D. | N.D. | Lab 4 | N.D. | N.D. | N.D. | N.D. | N.D. | N.D. | N.D. | Lab 12 | N.D. | N.D. | N.D. | N.D. | N.D. | N.D. | N.D. | Lab 13 | N.D. | N.D.  | N.D.   | N.D.   | N.D. | N.D. | N.D. | Lab 15 | N.D. | N.D.  | N.D.   | N.D.   | N.D. | N.D. | N.D. | Lab 9 | N.D. | N.D. | N.D. | N.D. | N.D. | N.D. | N.D. | Lab 2 | 2 | 46.27 | 1010.34 | 882.75 | +ESI | AD2 | a | Lab 18 | N.D. | N.D.  | N.D.   | N.D.   | N.D. | N.D. | N.D. | Lab 17 | N.D. | N.D. | N.D. | N.D. | N.D. | N.D. | N.D. | Lab 10 | N.D. | N.D. | N.D. | N.D. | N.D. | N.D. | N.D. | Lab 7 | 2    | 21.00 | 912.07 | 882.75 | +ESI | AD1  | a    |
| Institute | Level of identification confidence                                                                                                                                              | Exp. tR                                                                                                                                                                                                                                                                                                                                                                                                                                                                                                                                                                                                                                                                                                                                                                                                                                                                                                                                                                                                                                                                                                                                                                                                                                                                                                                                                                                                                                                                                                                                                                                                                                                                                                                                                                                                                                                                                                                                                                                                                                                                          | Exp. RTI  | Pred. RTI                          | ESI mode | Application domain | MCP       |          |                    |     |       |      |      |      |      |      |      |      |       |      |      |      |      |      |      |      |       |      |      |      |      |      |      |      |        |      |      |      |      |      |      |      |        |      |       |        |        |      |      |      |        |      |       |        |        |      |      |      |       |      |      |      |      |      |      |      |       |   |       |         |        |      |     |   |        |      |       |        |        |      |      |      |        |      |      |      |      |      |      |      |        |      |      |      |      |      |      |      |       |      |       |        |        |      |      |      |
| Lab 6     | N.D.                                                                                                                                                                            | N.D.                                                                                                                                                                                                                                                                                                                                                                                                                                                                                                                                                                                                                                                                                                                                                                                                                                                                                                                                                                                                                                                                                                                                                                                                                                                                                                                                                                                                                                                                                                                                                                                                                                                                                                                                                                                                                                                                                                                                                                                                                                                                             | N.D.      | N.D.                               | N.D.     | N.D.               | N.D.      |          |                    |     |       |      |      |      |      |      |      |      |       |      |      |      |      |      |      |      |       |      |      |      |      |      |      |      |        |      |      |      |      |      |      |      |        |      |       |        |        |      |      |      |        |      |       |        |        |      |      |      |       |      |      |      |      |      |      |      |       |   |       |         |        |      |     |   |        |      |       |        |        |      |      |      |        |      |      |      |      |      |      |      |        |      |      |      |      |      |      |      |       |      |       |        |        |      |      |      |
| Lab 5     | N.D.                                                                                                                                                                            | N.D.                                                                                                                                                                                                                                                                                                                                                                                                                                                                                                                                                                                                                                                                                                                                                                                                                                                                                                                                                                                                                                                                                                                                                                                                                                                                                                                                                                                                                                                                                                                                                                                                                                                                                                                                                                                                                                                                                                                                                                                                                                                                             | N.D.      | N.D.                               | N.D.     | N.D.               | N.D.      |          |                    |     |       |      |      |      |      |      |      |      |       |      |      |      |      |      |      |      |       |      |      |      |      |      |      |      |        |      |      |      |      |      |      |      |        |      |       |        |        |      |      |      |        |      |       |        |        |      |      |      |       |      |      |      |      |      |      |      |       |   |       |         |        |      |     |   |        |      |       |        |        |      |      |      |        |      |      |      |      |      |      |      |        |      |      |      |      |      |      |      |       |      |       |        |        |      |      |      |
| Lab 4     | N.D.                                                                                                                                                                            | N.D.                                                                                                                                                                                                                                                                                                                                                                                                                                                                                                                                                                                                                                                                                                                                                                                                                                                                                                                                                                                                                                                                                                                                                                                                                                                                                                                                                                                                                                                                                                                                                                                                                                                                                                                                                                                                                                                                                                                                                                                                                                                                             | N.D.      | N.D.                               | N.D.     | N.D.               | N.D.      |          |                    |     |       |      |      |      |      |      |      |      |       |      |      |      |      |      |      |      |       |      |      |      |      |      |      |      |        |      |      |      |      |      |      |      |        |      |       |        |        |      |      |      |        |      |       |        |        |      |      |      |       |      |      |      |      |      |      |      |       |   |       |         |        |      |     |   |        |      |       |        |        |      |      |      |        |      |      |      |      |      |      |      |        |      |      |      |      |      |      |      |       |      |       |        |        |      |      |      |
| Lab 12    | N.D.                                                                                                                                                                            | N.D.                                                                                                                                                                                                                                                                                                                                                                                                                                                                                                                                                                                                                                                                                                                                                                                                                                                                                                                                                                                                                                                                                                                                                                                                                                                                                                                                                                                                                                                                                                                                                                                                                                                                                                                                                                                                                                                                                                                                                                                                                                                                             | N.D.      | N.D.                               | N.D.     | N.D.               | N.D.      |          |                    |     |       |      |      |      |      |      |      |      |       |      |      |      |      |      |      |      |       |      |      |      |      |      |      |      |        |      |      |      |      |      |      |      |        |      |       |        |        |      |      |      |        |      |       |        |        |      |      |      |       |      |      |      |      |      |      |      |       |   |       |         |        |      |     |   |        |      |       |        |        |      |      |      |        |      |      |      |      |      |      |      |        |      |      |      |      |      |      |      |       |      |       |        |        |      |      |      |
| Lab 13    | N.D.                                                                                                                                                                            | N.D.                                                                                                                                                                                                                                                                                                                                                                                                                                                                                                                                                                                                                                                                                                                                                                                                                                                                                                                                                                                                                                                                                                                                                                                                                                                                                                                                                                                                                                                                                                                                                                                                                                                                                                                                                                                                                                                                                                                                                                                                                                                                             | N.D.      | N.D.                               | N.D.     | N.D.               | N.D.      |          |                    |     |       |      |      |      |      |      |      |      |       |      |      |      |      |      |      |      |       |      |      |      |      |      |      |      |        |      |      |      |      |      |      |      |        |      |       |        |        |      |      |      |        |      |       |        |        |      |      |      |       |      |      |      |      |      |      |      |       |   |       |         |        |      |     |   |        |      |       |        |        |      |      |      |        |      |      |      |      |      |      |      |        |      |      |      |      |      |      |      |       |      |       |        |        |      |      |      |
| Lab 15    | N.D.                                                                                                                                                                            | N.D.                                                                                                                                                                                                                                                                                                                                                                                                                                                                                                                                                                                                                                                                                                                                                                                                                                                                                                                                                                                                                                                                                                                                                                                                                                                                                                                                                                                                                                                                                                                                                                                                                                                                                                                                                                                                                                                                                                                                                                                                                                                                             | N.D.      | N.D.                               | N.D.     | N.D.               | N.D.      |          |                    |     |       |      |      |      |      |      |      |      |       |      |      |      |      |      |      |      |       |      |      |      |      |      |      |      |        |      |      |      |      |      |      |      |        |      |       |        |        |      |      |      |        |      |       |        |        |      |      |      |       |      |      |      |      |      |      |      |       |   |       |         |        |      |     |   |        |      |       |        |        |      |      |      |        |      |      |      |      |      |      |      |        |      |      |      |      |      |      |      |       |      |       |        |        |      |      |      |
| Lab 9     | N.D.                                                                                                                                                                            | N.D.                                                                                                                                                                                                                                                                                                                                                                                                                                                                                                                                                                                                                                                                                                                                                                                                                                                                                                                                                                                                                                                                                                                                                                                                                                                                                                                                                                                                                                                                                                                                                                                                                                                                                                                                                                                                                                                                                                                                                                                                                                                                             | N.D.      | N.D.                               | N.D.     | N.D.               | N.D.      |          |                    |     |       |      |      |      |      |      |      |      |       |      |      |      |      |      |      |      |       |      |      |      |      |      |      |      |        |      |      |      |      |      |      |      |        |      |       |        |        |      |      |      |        |      |       |        |        |      |      |      |       |      |      |      |      |      |      |      |       |   |       |         |        |      |     |   |        |      |       |        |        |      |      |      |        |      |      |      |      |      |      |      |        |      |      |      |      |      |      |      |       |      |       |        |        |      |      |      |
| Lab 2     | 2                                                                                                                                                                               | 46.27                                                                                                                                                                                                                                                                                                                                                                                                                                                                                                                                                                                                                                                                                                                                                                                                                                                                                                                                                                                                                                                                                                                                                                                                                                                                                                                                                                                                                                                                                                                                                                                                                                                                                                                                                                                                                                                                                                                                                                                                                                                                            | 1010.34   | 882.75                             | +ESI     | AD2                | a         |          |                    |     |       |      |      |      |      |      |      |      |       |      |      |      |      |      |      |      |       |      |      |      |      |      |      |      |        |      |      |      |      |      |      |      |        |      |       |        |        |      |      |      |        |      |       |        |        |      |      |      |       |      |      |      |      |      |      |      |       |   |       |         |        |      |     |   |        |      |       |        |        |      |      |      |        |      |      |      |      |      |      |      |        |      |      |      |      |      |      |      |       |      |       |        |        |      |      |      |
| Lab 18    | N.D.                                                                                                                                                                            | N.D.                                                                                                                                                                                                                                                                                                                                                                                                                                                                                                                                                                                                                                                                                                                                                                                                                                                                                                                                                                                                                                                                                                                                                                                                                                                                                                                                                                                                                                                                                                                                                                                                                                                                                                                                                                                                                                                                                                                                                                                                                                                                             | N.D.      | N.D.                               | N.D.     | N.D.               | N.D.      |          |                    |     |       |      |      |      |      |      |      |      |       |      |      |      |      |      |      |      |       |      |      |      |      |      |      |      |        |      |      |      |      |      |      |      |        |      |       |        |        |      |      |      |        |      |       |        |        |      |      |      |       |      |      |      |      |      |      |      |       |   |       |         |        |      |     |   |        |      |       |        |        |      |      |      |        |      |      |      |      |      |      |      |        |      |      |      |      |      |      |      |       |      |       |        |        |      |      |      |
| Lab 17    | N.D.                                                                                                                                                                            | N.D.                                                                                                                                                                                                                                                                                                                                                                                                                                                                                                                                                                                                                                                                                                                                                                                                                                                                                                                                                                                                                                                                                                                                                                                                                                                                                                                                                                                                                                                                                                                                                                                                                                                                                                                                                                                                                                                                                                                                                                                                                                                                             | N.D.      | N.D.                               | N.D.     | N.D.               | N.D.      |          |                    |     |       |      |      |      |      |      |      |      |       |      |      |      |      |      |      |      |       |      |      |      |      |      |      |      |        |      |      |      |      |      |      |      |        |      |       |        |        |      |      |      |        |      |       |        |        |      |      |      |       |      |      |      |      |      |      |      |       |   |       |         |        |      |     |   |        |      |       |        |        |      |      |      |        |      |      |      |      |      |      |      |        |      |      |      |      |      |      |      |       |      |       |        |        |      |      |      |
| Lab 10    | N.D.                                                                                                                                                                            | N.D.                                                                                                                                                                                                                                                                                                                                                                                                                                                                                                                                                                                                                                                                                                                                                                                                                                                                                                                                                                                                                                                                                                                                                                                                                                                                                                                                                                                                                                                                                                                                                                                                                                                                                                                                                                                                                                                                                                                                                                                                                                                                             | N.D.      | N.D.                               | N.D.     | N.D.               | N.D.      |          |                    |     |       |      |      |      |      |      |      |      |       |      |      |      |      |      |      |      |       |      |      |      |      |      |      |      |        |      |      |      |      |      |      |      |        |      |       |        |        |      |      |      |        |      |       |        |        |      |      |      |       |      |      |      |      |      |      |      |       |   |       |         |        |      |     |   |        |      |       |        |        |      |      |      |        |      |      |      |      |      |      |      |        |      |      |      |      |      |      |      |       |      |       |        |        |      |      |      |
| Lab 7     | 2                                                                                                                                                                               | 21.00                                                                                                                                                                                                                                                                                                                                                                                                                                                                                                                                                                                                                                                                                                                                                                                                                                                                                                                                                                                                                                                                                                                                                                                                                                                                                                                                                                                                                                                                                                                                                                                                                                                                                                                                                                                                                                                                                                                                                                                                                                                                            | 912.07    | 882.75                             | +ESI     | AD1                | a         |          |                    |     |       |      |      |      |      |      |      |      |       |      |      |      |      |      |      |      |       |      |      |      |      |      |      |      |        |      |      |      |      |      |      |      |        |      |       |        |        |      |      |      |        |      |       |        |        |      |      |      |       |      |      |      |      |      |      |      |       |   |       |         |        |      |     |   |        |      |       |        |        |      |      |      |        |      |      |      |      |      |      |      |        |      |      |      |      |      |      |      |       |      |       |        |        |      |      |      |
| (25)      | <p style="text-align: center;"><b>Comparison of Exp. RTI values: Octicizer</b></p> <p style="text-align: center;">No groups have means significantly different from Lab 13</p>  | <table border="1"> <thead> <tr> <th>Institute</th> <th>Level of identification confidence</th> <th>Exp. tR</th> <th>Exp. RTI</th> <th>Pred. RTI</th> <th>ESI mode</th> <th>Application domain</th> <th>MCP</th> </tr> </thead> <tbody> <tr><td>Lab 6</td><td>N.D.</td><td>N.D.</td><td>N.D.</td><td>N.D.</td><td>N.D.</td><td>N.D.</td><td>N.D.</td></tr> <tr><td>Lab 5</td><td>N.D.</td><td>N.D.</td><td>N.D.</td><td>N.D.</td><td>N.D.</td><td>N.D.</td><td>N.D.</td></tr> <tr><td>Lab 4</td><td>N.D.</td><td>N.D.</td><td>N.D.</td><td>N.D.</td><td>N.D.</td><td>N.D.</td><td>N.D.</td></tr> <tr><td>Lab 12</td><td>N.D.</td><td>N.D.</td><td>N.D.</td><td>N.D.</td><td>N.D.</td><td>N.D.</td><td>N.D.</td></tr> <tr><td>Lab 13</td><td>3</td><td>22.78</td><td>857.28</td><td>890.59</td><td>+ESI</td><td>AD1</td><td>a</td></tr> <tr><td>Lab 15</td><td>1</td><td>10.66</td><td>884.93</td><td>890.59</td><td>+ESI</td><td>AD1</td><td>a</td></tr> <tr><td>Lab 9</td><td>N.D.</td><td>N.D.</td><td>N.D.</td><td>N.D.</td><td>N.D.</td><td>N.D.</td><td>N.D.</td></tr> <tr><td>Lab 2</td><td>3</td><td>41.23</td><td>908.16</td><td>890.59</td><td>+ESI</td><td>AD1</td><td>a</td></tr> <tr><td>Lab 18</td><td>1</td><td>17.45</td><td>779.24</td><td>890.59</td><td>+ESI</td><td>AD2</td><td>a</td></tr> <tr><td>Lab 17</td><td>N.D.</td><td>N.D.</td><td>N.D.</td><td>N.D.</td><td>N.D.</td><td>N.D.</td><td>N.D.</td></tr> <tr><td>Lab 10</td><td>N.D.</td><td>N.D.</td><td>N.D.</td><td>N.D.</td><td>N.D.</td><td>N.D.</td><td>N.D.</td></tr> <tr><td>Lab 7</td><td>N.D.</td><td>N.D.</td><td>N.D.</td><td>N.D.</td><td>N.D.</td><td>N.D.</td><td>N.D.</td></tr> </tbody> </table> <p>AD1: Exp. &amp; Pred. tR are accepted for this candidate (box1)<br/> AD2: Although there is error, exp. &amp; pred. tR are accepted for this candidate (box2)<br/> N.D.: Not detected.<br/> All institutes have acceptable exp. RTI values and the difference is <b>not significant at 99% CIs</b> of the calibration curve. <b>Promote "Lab 13" &amp; "Lab 2" to level 2!</b></p> | Institute | Level of identification confidence | Exp. tR  | Exp. RTI           | Pred. RTI | ESI mode | Application domain | MCP | Lab 6 | N.D. | N.D. | N.D. | N.D. | N.D. | N.D. | N.D. | Lab 5 | N.D. | N.D. | N.D. | N.D. | N.D. | N.D. | N.D. | Lab 4 | N.D. | N.D. | N.D. | N.D. | N.D. | N.D. | N.D. | Lab 12 | N.D. | N.D. | N.D. | N.D. | N.D. | N.D. | N.D. | Lab 13 | 3    | 22.78 | 857.28 | 890.59 | +ESI | AD1  | a    | Lab 15 | 1    | 10.66 | 884.93 | 890.59 | +ESI | AD1  | a    | Lab 9 | N.D. | N.D. | N.D. | N.D. | N.D. | N.D. | N.D. | Lab 2 | 3 | 41.23 | 908.16  | 890.59 | +ESI | AD1 | a | Lab 18 | 1    | 17.45 | 779.24 | 890.59 | +ESI | AD2  | a    | Lab 17 | N.D. | N.D. | N.D. | N.D. | N.D. | N.D. | N.D. | Lab 10 | N.D. | N.D. | N.D. | N.D. | N.D. | N.D. | N.D. | Lab 7 | N.D. | N.D.  | N.D.   | N.D.   | N.D. | N.D. | N.D. |
| Institute | Level of identification confidence                                                                                                                                              | Exp. tR                                                                                                                                                                                                                                                                                                                                                                                                                                                                                                                                                                                                                                                                                                                                                                                                                                                                                                                                                                                                                                                                                                                                                                                                                                                                                                                                                                                                                                                                                                                                                                                                                                                                                                                                                                                                                                                                                                                                                                                                                                                                          | Exp. RTI  | Pred. RTI                          | ESI mode | Application domain | MCP       |          |                    |     |       |      |      |      |      |      |      |      |       |      |      |      |      |      |      |      |       |      |      |      |      |      |      |      |        |      |      |      |      |      |      |      |        |      |       |        |        |      |      |      |        |      |       |        |        |      |      |      |       |      |      |      |      |      |      |      |       |   |       |         |        |      |     |   |        |      |       |        |        |      |      |      |        |      |      |      |      |      |      |      |        |      |      |      |      |      |      |      |       |      |       |        |        |      |      |      |
| Lab 6     | N.D.                                                                                                                                                                            | N.D.                                                                                                                                                                                                                                                                                                                                                                                                                                                                                                                                                                                                                                                                                                                                                                                                                                                                                                                                                                                                                                                                                                                                                                                                                                                                                                                                                                                                                                                                                                                                                                                                                                                                                                                                                                                                                                                                                                                                                                                                                                                                             | N.D.      | N.D.                               | N.D.     | N.D.               | N.D.      |          |                    |     |       |      |      |      |      |      |      |      |       |      |      |      |      |      |      |      |       |      |      |      |      |      |      |      |        |      |      |      |      |      |      |      |        |      |       |        |        |      |      |      |        |      |       |        |        |      |      |      |       |      |      |      |      |      |      |      |       |   |       |         |        |      |     |   |        |      |       |        |        |      |      |      |        |      |      |      |      |      |      |      |        |      |      |      |      |      |      |      |       |      |       |        |        |      |      |      |
| Lab 5     | N.D.                                                                                                                                                                            | N.D.                                                                                                                                                                                                                                                                                                                                                                                                                                                                                                                                                                                                                                                                                                                                                                                                                                                                                                                                                                                                                                                                                                                                                                                                                                                                                                                                                                                                                                                                                                                                                                                                                                                                                                                                                                                                                                                                                                                                                                                                                                                                             | N.D.      | N.D.                               | N.D.     | N.D.               | N.D.      |          |                    |     |       |      |      |      |      |      |      |      |       |      |      |      |      |      |      |      |       |      |      |      |      |      |      |      |        |      |      |      |      |      |      |      |        |      |       |        |        |      |      |      |        |      |       |        |        |      |      |      |       |      |      |      |      |      |      |      |       |   |       |         |        |      |     |   |        |      |       |        |        |      |      |      |        |      |      |      |      |      |      |      |        |      |      |      |      |      |      |      |       |      |       |        |        |      |      |      |
| Lab 4     | N.D.                                                                                                                                                                            | N.D.                                                                                                                                                                                                                                                                                                                                                                                                                                                                                                                                                                                                                                                                                                                                                                                                                                                                                                                                                                                                                                                                                                                                                                                                                                                                                                                                                                                                                                                                                                                                                                                                                                                                                                                                                                                                                                                                                                                                                                                                                                                                             | N.D.      | N.D.                               | N.D.     | N.D.               | N.D.      |          |                    |     |       |      |      |      |      |      |      |      |       |      |      |      |      |      |      |      |       |      |      |      |      |      |      |      |        |      |      |      |      |      |      |      |        |      |       |        |        |      |      |      |        |      |       |        |        |      |      |      |       |      |      |      |      |      |      |      |       |   |       |         |        |      |     |   |        |      |       |        |        |      |      |      |        |      |      |      |      |      |      |      |        |      |      |      |      |      |      |      |       |      |       |        |        |      |      |      |
| Lab 12    | N.D.                                                                                                                                                                            | N.D.                                                                                                                                                                                                                                                                                                                                                                                                                                                                                                                                                                                                                                                                                                                                                                                                                                                                                                                                                                                                                                                                                                                                                                                                                                                                                                                                                                                                                                                                                                                                                                                                                                                                                                                                                                                                                                                                                                                                                                                                                                                                             | N.D.      | N.D.                               | N.D.     | N.D.               | N.D.      |          |                    |     |       |      |      |      |      |      |      |      |       |      |      |      |      |      |      |      |       |      |      |      |      |      |      |      |        |      |      |      |      |      |      |      |        |      |       |        |        |      |      |      |        |      |       |        |        |      |      |      |       |      |      |      |      |      |      |      |       |   |       |         |        |      |     |   |        |      |       |        |        |      |      |      |        |      |      |      |      |      |      |      |        |      |      |      |      |      |      |      |       |      |       |        |        |      |      |      |
| Lab 13    | 3                                                                                                                                                                               | 22.78                                                                                                                                                                                                                                                                                                                                                                                                                                                                                                                                                                                                                                                                                                                                                                                                                                                                                                                                                                                                                                                                                                                                                                                                                                                                                                                                                                                                                                                                                                                                                                                                                                                                                                                                                                                                                                                                                                                                                                                                                                                                            | 857.28    | 890.59                             | +ESI     | AD1                | a         |          |                    |     |       |      |      |      |      |      |      |      |       |      |      |      |      |      |      |      |       |      |      |      |      |      |      |      |        |      |      |      |      |      |      |      |        |      |       |        |        |      |      |      |        |      |       |        |        |      |      |      |       |      |      |      |      |      |      |      |       |   |       |         |        |      |     |   |        |      |       |        |        |      |      |      |        |      |      |      |      |      |      |      |        |      |      |      |      |      |      |      |       |      |       |        |        |      |      |      |
| Lab 15    | 1                                                                                                                                                                               | 10.66                                                                                                                                                                                                                                                                                                                                                                                                                                                                                                                                                                                                                                                                                                                                                                                                                                                                                                                                                                                                                                                                                                                                                                                                                                                                                                                                                                                                                                                                                                                                                                                                                                                                                                                                                                                                                                                                                                                                                                                                                                                                            | 884.93    | 890.59                             | +ESI     | AD1                | a         |          |                    |     |       |      |      |      |      |      |      |      |       |      |      |      |      |      |      |      |       |      |      |      |      |      |      |      |        |      |      |      |      |      |      |      |        |      |       |        |        |      |      |      |        |      |       |        |        |      |      |      |       |      |      |      |      |      |      |      |       |   |       |         |        |      |     |   |        |      |       |        |        |      |      |      |        |      |      |      |      |      |      |      |        |      |      |      |      |      |      |      |       |      |       |        |        |      |      |      |
| Lab 9     | N.D.                                                                                                                                                                            | N.D.                                                                                                                                                                                                                                                                                                                                                                                                                                                                                                                                                                                                                                                                                                                                                                                                                                                                                                                                                                                                                                                                                                                                                                                                                                                                                                                                                                                                                                                                                                                                                                                                                                                                                                                                                                                                                                                                                                                                                                                                                                                                             | N.D.      | N.D.                               | N.D.     | N.D.               | N.D.      |          |                    |     |       |      |      |      |      |      |      |      |       |      |      |      |      |      |      |      |       |      |      |      |      |      |      |      |        |      |      |      |      |      |      |      |        |      |       |        |        |      |      |      |        |      |       |        |        |      |      |      |       |      |      |      |      |      |      |      |       |   |       |         |        |      |     |   |        |      |       |        |        |      |      |      |        |      |      |      |      |      |      |      |        |      |      |      |      |      |      |      |       |      |       |        |        |      |      |      |
| Lab 2     | 3                                                                                                                                                                               | 41.23                                                                                                                                                                                                                                                                                                                                                                                                                                                                                                                                                                                                                                                                                                                                                                                                                                                                                                                                                                                                                                                                                                                                                                                                                                                                                                                                                                                                                                                                                                                                                                                                                                                                                                                                                                                                                                                                                                                                                                                                                                                                            | 908.16    | 890.59                             | +ESI     | AD1                | a         |          |                    |     |       |      |      |      |      |      |      |      |       |      |      |      |      |      |      |      |       |      |      |      |      |      |      |      |        |      |      |      |      |      |      |      |        |      |       |        |        |      |      |      |        |      |       |        |        |      |      |      |       |      |      |      |      |      |      |      |       |   |       |         |        |      |     |   |        |      |       |        |        |      |      |      |        |      |      |      |      |      |      |      |        |      |      |      |      |      |      |      |       |      |       |        |        |      |      |      |
| Lab 18    | 1                                                                                                                                                                               | 17.45                                                                                                                                                                                                                                                                                                                                                                                                                                                                                                                                                                                                                                                                                                                                                                                                                                                                                                                                                                                                                                                                                                                                                                                                                                                                                                                                                                                                                                                                                                                                                                                                                                                                                                                                                                                                                                                                                                                                                                                                                                                                            | 779.24    | 890.59                             | +ESI     | AD2                | a         |          |                    |     |       |      |      |      |      |      |      |      |       |      |      |      |      |      |      |      |       |      |      |      |      |      |      |      |        |      |      |      |      |      |      |      |        |      |       |        |        |      |      |      |        |      |       |        |        |      |      |      |       |      |      |      |      |      |      |      |       |   |       |         |        |      |     |   |        |      |       |        |        |      |      |      |        |      |      |      |      |      |      |      |        |      |      |      |      |      |      |      |       |      |       |        |        |      |      |      |
| Lab 17    | N.D.                                                                                                                                                                            | N.D.                                                                                                                                                                                                                                                                                                                                                                                                                                                                                                                                                                                                                                                                                                                                                                                                                                                                                                                                                                                                                                                                                                                                                                                                                                                                                                                                                                                                                                                                                                                                                                                                                                                                                                                                                                                                                                                                                                                                                                                                                                                                             | N.D.      | N.D.                               | N.D.     | N.D.               | N.D.      |          |                    |     |       |      |      |      |      |      |      |      |       |      |      |      |      |      |      |      |       |      |      |      |      |      |      |      |        |      |      |      |      |      |      |      |        |      |       |        |        |      |      |      |        |      |       |        |        |      |      |      |       |      |      |      |      |      |      |      |       |   |       |         |        |      |     |   |        |      |       |        |        |      |      |      |        |      |      |      |      |      |      |      |        |      |      |      |      |      |      |      |       |      |       |        |        |      |      |      |
| Lab 10    | N.D.                                                                                                                                                                            | N.D.                                                                                                                                                                                                                                                                                                                                                                                                                                                                                                                                                                                                                                                                                                                                                                                                                                                                                                                                                                                                                                                                                                                                                                                                                                                                                                                                                                                                                                                                                                                                                                                                                                                                                                                                                                                                                                                                                                                                                                                                                                                                             | N.D.      | N.D.                               | N.D.     | N.D.               | N.D.      |          |                    |     |       |      |      |      |      |      |      |      |       |      |      |      |      |      |      |      |       |      |      |      |      |      |      |      |        |      |      |      |      |      |      |      |        |      |       |        |        |      |      |      |        |      |       |        |        |      |      |      |       |      |      |      |      |      |      |      |       |   |       |         |        |      |     |   |        |      |       |        |        |      |      |      |        |      |      |      |      |      |      |      |        |      |      |      |      |      |      |      |       |      |       |        |        |      |      |      |
| Lab 7     | N.D.                                                                                                                                                                            | N.D.                                                                                                                                                                                                                                                                                                                                                                                                                                                                                                                                                                                                                                                                                                                                                                                                                                                                                                                                                                                                                                                                                                                                                                                                                                                                                                                                                                                                                                                                                                                                                                                                                                                                                                                                                                                                                                                                                                                                                                                                                                                                             | N.D.      | N.D.                               | N.D.     | N.D.               | N.D.      |          |                    |     |       |      |      |      |      |      |      |      |       |      |      |      |      |      |      |      |       |      |      |      |      |      |      |      |        |      |      |      |      |      |      |      |        |      |       |        |        |      |      |      |        |      |       |        |        |      |      |      |       |      |      |      |      |      |      |      |       |   |       |         |        |      |     |   |        |      |       |        |        |      |      |      |        |      |      |      |      |      |      |      |        |      |      |      |      |      |      |      |       |      |       |        |        |      |      |      |

| No.    | multiple comparison procedure plot                                                                                                                                                                                                                                            | RTI details                                                                                                                                                                                                                                                                                                                                                                                                                                                                                                                                                                                                                                                                                                                                                                                                                                                                                                                                                                                                                                                                                                                                                                                                                                                                                                                                                                                                                                                                                                                                                                                                                                                                                                                                                                                                                                                                                                                                                                                                                                                                                                                                                                                                                                                       |           |                                    |           |          |                    |          |                    |     |       |      |      |        |        |      |      |      |       |      |      |      |      |      |      |      |       |      |      |        |        |      |      |      |        |    |      |        |        |      |     |   |        |      |      |      |      |      |      |      |        |   |      |        |        |      |      |   |       |      |      |        |        |      |      |      |       |      |      |      |      |      |      |      |        |      |      |      |      |      |      |      |        |      |      |        |        |      |      |      |        |      |      |        |        |      |      |      |       |      |      |      |      |      |      |      |
|--------|-------------------------------------------------------------------------------------------------------------------------------------------------------------------------------------------------------------------------------------------------------------------------------|-------------------------------------------------------------------------------------------------------------------------------------------------------------------------------------------------------------------------------------------------------------------------------------------------------------------------------------------------------------------------------------------------------------------------------------------------------------------------------------------------------------------------------------------------------------------------------------------------------------------------------------------------------------------------------------------------------------------------------------------------------------------------------------------------------------------------------------------------------------------------------------------------------------------------------------------------------------------------------------------------------------------------------------------------------------------------------------------------------------------------------------------------------------------------------------------------------------------------------------------------------------------------------------------------------------------------------------------------------------------------------------------------------------------------------------------------------------------------------------------------------------------------------------------------------------------------------------------------------------------------------------------------------------------------------------------------------------------------------------------------------------------------------------------------------------------------------------------------------------------------------------------------------------------------------------------------------------------------------------------------------------------------------------------------------------------------------------------------------------------------------------------------------------------------------------------------------------------------------------------------------------------|-----------|------------------------------------|-----------|----------|--------------------|----------|--------------------|-----|-------|------|------|--------|--------|------|------|------|-------|------|------|------|------|------|------|------|-------|------|------|--------|--------|------|------|------|--------|----|------|--------|--------|------|-----|---|--------|------|------|------|------|------|------|------|--------|---|------|--------|--------|------|------|---|-------|------|------|--------|--------|------|------|------|-------|------|------|------|------|------|------|------|--------|------|------|------|------|------|------|------|--------|------|------|--------|--------|------|------|------|--------|------|------|--------|--------|------|------|------|-------|------|------|------|------|------|------|------|
| (26)   | <p data-bbox="331 172 887 199"><b>Comparison of Exp. RTI values: D(-)-Morphine</b></p> 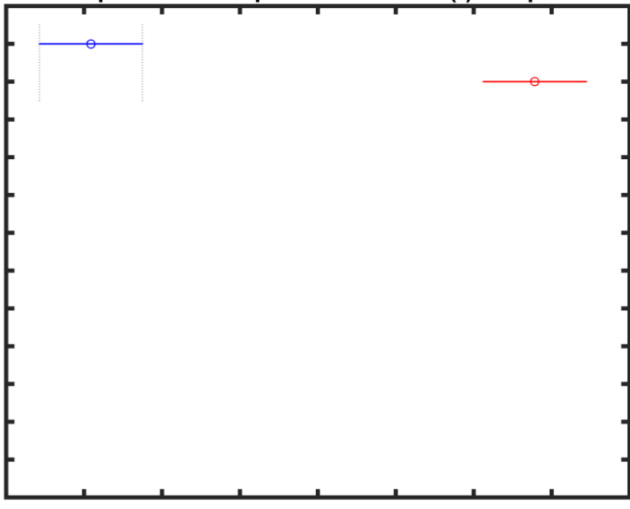 <p data-bbox="219 737 990 764">The means of groups Lab 12 and Lab 15 are significantly different</p> | <table border="1"> <thead> <tr> <th>Institute</th> <th>Level of identification confidence</th> <th>Exp. tR</th> <th>Exp. RTI</th> <th>Pred. RTI</th> <th>ESI mode</th> <th>Application domain</th> <th>MCP</th> </tr> </thead> <tbody> <tr><td>Lab 6</td><td>N.D.</td><td>N.D.</td><td>N.D.</td><td>N.D.</td><td>N.D.</td><td>N.D.</td><td>N.D.</td></tr> <tr><td>Lab 5</td><td>N.D.</td><td>N.D.</td><td>N.D.</td><td>N.D.</td><td>N.D.</td><td>N.D.</td><td>N.D.</td></tr> <tr><td>Lab 4</td><td>N.D.</td><td>N.D.</td><td>N.D.</td><td>N.D.</td><td>N.D.</td><td>N.D.</td><td>N.D.</td></tr> <tr><td>Lab 12</td><td>2a</td><td>1.43</td><td>108.79</td><td>111.19</td><td>+ESI</td><td>AD1</td><td>a</td></tr> <tr><td>Lab 13</td><td>N.D.</td><td>N.D.</td><td>N.D.</td><td>N.D.</td><td>N.D.</td><td>N.D.</td><td>N.D.</td></tr> <tr><td>Lab 15</td><td>4</td><td>8.20</td><td>678.43</td><td>111.19</td><td>+ESI</td><td>AD4a</td><td>b</td></tr> <tr><td>Lab 9</td><td>N.D.</td><td>N.D.</td><td>N.D.</td><td>N.D.</td><td>N.D.</td><td>N.D.</td><td>N.D.</td></tr> <tr><td>Lab 2</td><td>N.D.</td><td>N.D.</td><td>N.D.</td><td>N.D.</td><td>N.D.</td><td>N.D.</td><td>N.D.</td></tr> <tr><td>Lab 18</td><td>N.D.</td><td>N.D.</td><td>N.D.</td><td>N.D.</td><td>N.D.</td><td>N.D.</td><td>N.D.</td></tr> <tr><td>Lab 17</td><td>N.D.</td><td>N.D.</td><td>N.D.</td><td>N.D.</td><td>N.D.</td><td>N.D.</td><td>N.D.</td></tr> <tr><td>Lab 10</td><td>N.D.</td><td>N.D.</td><td>N.D.</td><td>N.D.</td><td>N.D.</td><td>N.D.</td><td>N.D.</td></tr> <tr><td>Lab 7</td><td>N.D.</td><td>N.D.</td><td>N.D.</td><td>N.D.</td><td>N.D.</td><td>N.D.</td><td>N.D.</td></tr> </tbody> </table> <p data-bbox="1003 624 1644 644">AD1: Exp. &amp; Pred. tR are accepted for this candidate (box1)</p> <p data-bbox="1003 651 2116 705">AD4a: Pred./Exp. tR are not reliable (high SR; the LC method used is not well suited for this compound, it could be a false positive) (box4)</p> <p data-bbox="1003 711 1211 732">N.D.: Not detected.</p> <p data-bbox="1003 738 2092 799">Note: This compound is false positive in “Lab 15” data, as the experimental and predicted RTI do not match comparing to “Lab 12” data which is at level of identification 2a.</p> | Institute | Level of identification confidence | Exp. tR   | Exp. RTI | Pred. RTI          | ESI mode | Application domain | MCP | Lab 6 | N.D. | N.D. | N.D.   | N.D.   | N.D. | N.D. | N.D. | Lab 5 | N.D. | N.D. | N.D. | N.D. | N.D. | N.D. | N.D. | Lab 4 | N.D. | N.D. | N.D.   | N.D.   | N.D. | N.D. | N.D. | Lab 12 | 2a | 1.43 | 108.79 | 111.19 | +ESI | AD1 | a | Lab 13 | N.D. | N.D. | N.D. | N.D. | N.D. | N.D. | N.D. | Lab 15 | 4 | 8.20 | 678.43 | 111.19 | +ESI | AD4a | b | Lab 9 | N.D. | N.D. | N.D.   | N.D.   | N.D. | N.D. | N.D. | Lab 2 | N.D. | N.D. | N.D. | N.D. | N.D. | N.D. | N.D. | Lab 18 | N.D. | N.D. | N.D. | N.D. | N.D. | N.D. | N.D. | Lab 17 | N.D. | N.D. | N.D.   | N.D.   | N.D. | N.D. | N.D. | Lab 10 | N.D. | N.D. | N.D.   | N.D.   | N.D. | N.D. | N.D. | Lab 7 | N.D. | N.D. | N.D. | N.D. | N.D. | N.D. | N.D. |
|        | Institute                                                                                                                                                                                                                                                                     | Level of identification confidence                                                                                                                                                                                                                                                                                                                                                                                                                                                                                                                                                                                                                                                                                                                                                                                                                                                                                                                                                                                                                                                                                                                                                                                                                                                                                                                                                                                                                                                                                                                                                                                                                                                                                                                                                                                                                                                                                                                                                                                                                                                                                                                                                                                                                                | Exp. tR   | Exp. RTI                           | Pred. RTI | ESI mode | Application domain | MCP      |                    |     |       |      |      |        |        |      |      |      |       |      |      |      |      |      |      |      |       |      |      |        |        |      |      |      |        |    |      |        |        |      |     |   |        |      |      |      |      |      |      |      |        |   |      |        |        |      |      |   |       |      |      |        |        |      |      |      |       |      |      |      |      |      |      |      |        |      |      |      |      |      |      |      |        |      |      |        |        |      |      |      |        |      |      |        |        |      |      |      |       |      |      |      |      |      |      |      |
| Lab 6  | N.D.                                                                                                                                                                                                                                                                          | N.D.                                                                                                                                                                                                                                                                                                                                                                                                                                                                                                                                                                                                                                                                                                                                                                                                                                                                                                                                                                                                                                                                                                                                                                                                                                                                                                                                                                                                                                                                                                                                                                                                                                                                                                                                                                                                                                                                                                                                                                                                                                                                                                                                                                                                                                                              | N.D.      | N.D.                               | N.D.      | N.D.     | N.D.               |          |                    |     |       |      |      |        |        |      |      |      |       |      |      |      |      |      |      |      |       |      |      |        |        |      |      |      |        |    |      |        |        |      |     |   |        |      |      |      |      |      |      |      |        |   |      |        |        |      |      |   |       |      |      |        |        |      |      |      |       |      |      |      |      |      |      |      |        |      |      |      |      |      |      |      |        |      |      |        |        |      |      |      |        |      |      |        |        |      |      |      |       |      |      |      |      |      |      |      |
| Lab 5  | N.D.                                                                                                                                                                                                                                                                          | N.D.                                                                                                                                                                                                                                                                                                                                                                                                                                                                                                                                                                                                                                                                                                                                                                                                                                                                                                                                                                                                                                                                                                                                                                                                                                                                                                                                                                                                                                                                                                                                                                                                                                                                                                                                                                                                                                                                                                                                                                                                                                                                                                                                                                                                                                                              | N.D.      | N.D.                               | N.D.      | N.D.     | N.D.               |          |                    |     |       |      |      |        |        |      |      |      |       |      |      |      |      |      |      |      |       |      |      |        |        |      |      |      |        |    |      |        |        |      |     |   |        |      |      |      |      |      |      |      |        |   |      |        |        |      |      |   |       |      |      |        |        |      |      |      |       |      |      |      |      |      |      |      |        |      |      |      |      |      |      |      |        |      |      |        |        |      |      |      |        |      |      |        |        |      |      |      |       |      |      |      |      |      |      |      |
| Lab 4  | N.D.                                                                                                                                                                                                                                                                          | N.D.                                                                                                                                                                                                                                                                                                                                                                                                                                                                                                                                                                                                                                                                                                                                                                                                                                                                                                                                                                                                                                                                                                                                                                                                                                                                                                                                                                                                                                                                                                                                                                                                                                                                                                                                                                                                                                                                                                                                                                                                                                                                                                                                                                                                                                                              | N.D.      | N.D.                               | N.D.      | N.D.     | N.D.               |          |                    |     |       |      |      |        |        |      |      |      |       |      |      |      |      |      |      |      |       |      |      |        |        |      |      |      |        |    |      |        |        |      |     |   |        |      |      |      |      |      |      |      |        |   |      |        |        |      |      |   |       |      |      |        |        |      |      |      |       |      |      |      |      |      |      |      |        |      |      |      |      |      |      |      |        |      |      |        |        |      |      |      |        |      |      |        |        |      |      |      |       |      |      |      |      |      |      |      |
| Lab 12 | 2a                                                                                                                                                                                                                                                                            | 1.43                                                                                                                                                                                                                                                                                                                                                                                                                                                                                                                                                                                                                                                                                                                                                                                                                                                                                                                                                                                                                                                                                                                                                                                                                                                                                                                                                                                                                                                                                                                                                                                                                                                                                                                                                                                                                                                                                                                                                                                                                                                                                                                                                                                                                                                              | 108.79    | 111.19                             | +ESI      | AD1      | a                  |          |                    |     |       |      |      |        |        |      |      |      |       |      |      |      |      |      |      |      |       |      |      |        |        |      |      |      |        |    |      |        |        |      |     |   |        |      |      |      |      |      |      |      |        |   |      |        |        |      |      |   |       |      |      |        |        |      |      |      |       |      |      |      |      |      |      |      |        |      |      |      |      |      |      |      |        |      |      |        |        |      |      |      |        |      |      |        |        |      |      |      |       |      |      |      |      |      |      |      |
| Lab 13 | N.D.                                                                                                                                                                                                                                                                          | N.D.                                                                                                                                                                                                                                                                                                                                                                                                                                                                                                                                                                                                                                                                                                                                                                                                                                                                                                                                                                                                                                                                                                                                                                                                                                                                                                                                                                                                                                                                                                                                                                                                                                                                                                                                                                                                                                                                                                                                                                                                                                                                                                                                                                                                                                                              | N.D.      | N.D.                               | N.D.      | N.D.     | N.D.               |          |                    |     |       |      |      |        |        |      |      |      |       |      |      |      |      |      |      |      |       |      |      |        |        |      |      |      |        |    |      |        |        |      |     |   |        |      |      |      |      |      |      |      |        |   |      |        |        |      |      |   |       |      |      |        |        |      |      |      |       |      |      |      |      |      |      |      |        |      |      |      |      |      |      |      |        |      |      |        |        |      |      |      |        |      |      |        |        |      |      |      |       |      |      |      |      |      |      |      |
| Lab 15 | 4                                                                                                                                                                                                                                                                             | 8.20                                                                                                                                                                                                                                                                                                                                                                                                                                                                                                                                                                                                                                                                                                                                                                                                                                                                                                                                                                                                                                                                                                                                                                                                                                                                                                                                                                                                                                                                                                                                                                                                                                                                                                                                                                                                                                                                                                                                                                                                                                                                                                                                                                                                                                                              | 678.43    | 111.19                             | +ESI      | AD4a     | b                  |          |                    |     |       |      |      |        |        |      |      |      |       |      |      |      |      |      |      |      |       |      |      |        |        |      |      |      |        |    |      |        |        |      |     |   |        |      |      |      |      |      |      |      |        |   |      |        |        |      |      |   |       |      |      |        |        |      |      |      |       |      |      |      |      |      |      |      |        |      |      |      |      |      |      |      |        |      |      |        |        |      |      |      |        |      |      |        |        |      |      |      |       |      |      |      |      |      |      |      |
| Lab 9  | N.D.                                                                                                                                                                                                                                                                          | N.D.                                                                                                                                                                                                                                                                                                                                                                                                                                                                                                                                                                                                                                                                                                                                                                                                                                                                                                                                                                                                                                                                                                                                                                                                                                                                                                                                                                                                                                                                                                                                                                                                                                                                                                                                                                                                                                                                                                                                                                                                                                                                                                                                                                                                                                                              | N.D.      | N.D.                               | N.D.      | N.D.     | N.D.               |          |                    |     |       |      |      |        |        |      |      |      |       |      |      |      |      |      |      |      |       |      |      |        |        |      |      |      |        |    |      |        |        |      |     |   |        |      |      |      |      |      |      |      |        |   |      |        |        |      |      |   |       |      |      |        |        |      |      |      |       |      |      |      |      |      |      |      |        |      |      |      |      |      |      |      |        |      |      |        |        |      |      |      |        |      |      |        |        |      |      |      |       |      |      |      |      |      |      |      |
| Lab 2  | N.D.                                                                                                                                                                                                                                                                          | N.D.                                                                                                                                                                                                                                                                                                                                                                                                                                                                                                                                                                                                                                                                                                                                                                                                                                                                                                                                                                                                                                                                                                                                                                                                                                                                                                                                                                                                                                                                                                                                                                                                                                                                                                                                                                                                                                                                                                                                                                                                                                                                                                                                                                                                                                                              | N.D.      | N.D.                               | N.D.      | N.D.     | N.D.               |          |                    |     |       |      |      |        |        |      |      |      |       |      |      |      |      |      |      |      |       |      |      |        |        |      |      |      |        |    |      |        |        |      |     |   |        |      |      |      |      |      |      |      |        |   |      |        |        |      |      |   |       |      |      |        |        |      |      |      |       |      |      |      |      |      |      |      |        |      |      |      |      |      |      |      |        |      |      |        |        |      |      |      |        |      |      |        |        |      |      |      |       |      |      |      |      |      |      |      |
| Lab 18 | N.D.                                                                                                                                                                                                                                                                          | N.D.                                                                                                                                                                                                                                                                                                                                                                                                                                                                                                                                                                                                                                                                                                                                                                                                                                                                                                                                                                                                                                                                                                                                                                                                                                                                                                                                                                                                                                                                                                                                                                                                                                                                                                                                                                                                                                                                                                                                                                                                                                                                                                                                                                                                                                                              | N.D.      | N.D.                               | N.D.      | N.D.     | N.D.               |          |                    |     |       |      |      |        |        |      |      |      |       |      |      |      |      |      |      |      |       |      |      |        |        |      |      |      |        |    |      |        |        |      |     |   |        |      |      |      |      |      |      |      |        |   |      |        |        |      |      |   |       |      |      |        |        |      |      |      |       |      |      |      |      |      |      |      |        |      |      |      |      |      |      |      |        |      |      |        |        |      |      |      |        |      |      |        |        |      |      |      |       |      |      |      |      |      |      |      |
| Lab 17 | N.D.                                                                                                                                                                                                                                                                          | N.D.                                                                                                                                                                                                                                                                                                                                                                                                                                                                                                                                                                                                                                                                                                                                                                                                                                                                                                                                                                                                                                                                                                                                                                                                                                                                                                                                                                                                                                                                                                                                                                                                                                                                                                                                                                                                                                                                                                                                                                                                                                                                                                                                                                                                                                                              | N.D.      | N.D.                               | N.D.      | N.D.     | N.D.               |          |                    |     |       |      |      |        |        |      |      |      |       |      |      |      |      |      |      |      |       |      |      |        |        |      |      |      |        |    |      |        |        |      |     |   |        |      |      |      |      |      |      |      |        |   |      |        |        |      |      |   |       |      |      |        |        |      |      |      |       |      |      |      |      |      |      |      |        |      |      |      |      |      |      |      |        |      |      |        |        |      |      |      |        |      |      |        |        |      |      |      |       |      |      |      |      |      |      |      |
| Lab 10 | N.D.                                                                                                                                                                                                                                                                          | N.D.                                                                                                                                                                                                                                                                                                                                                                                                                                                                                                                                                                                                                                                                                                                                                                                                                                                                                                                                                                                                                                                                                                                                                                                                                                                                                                                                                                                                                                                                                                                                                                                                                                                                                                                                                                                                                                                                                                                                                                                                                                                                                                                                                                                                                                                              | N.D.      | N.D.                               | N.D.      | N.D.     | N.D.               |          |                    |     |       |      |      |        |        |      |      |      |       |      |      |      |      |      |      |      |       |      |      |        |        |      |      |      |        |    |      |        |        |      |     |   |        |      |      |      |      |      |      |      |        |   |      |        |        |      |      |   |       |      |      |        |        |      |      |      |       |      |      |      |      |      |      |      |        |      |      |      |      |      |      |      |        |      |      |        |        |      |      |      |        |      |      |        |        |      |      |      |       |      |      |      |      |      |      |      |
| Lab 7  | N.D.                                                                                                                                                                                                                                                                          | N.D.                                                                                                                                                                                                                                                                                                                                                                                                                                                                                                                                                                                                                                                                                                                                                                                                                                                                                                                                                                                                                                                                                                                                                                                                                                                                                                                                                                                                                                                                                                                                                                                                                                                                                                                                                                                                                                                                                                                                                                                                                                                                                                                                                                                                                                                              | N.D.      | N.D.                               | N.D.      | N.D.     | N.D.               |          |                    |     |       |      |      |        |        |      |      |      |       |      |      |      |      |      |      |      |       |      |      |        |        |      |      |      |        |    |      |        |        |      |     |   |        |      |      |      |      |      |      |      |        |   |      |        |        |      |      |   |       |      |      |        |        |      |      |      |       |      |      |      |      |      |      |      |        |      |      |      |      |      |      |      |        |      |      |        |        |      |      |      |        |      |      |        |        |      |      |      |       |      |      |      |      |      |      |      |
| (27)   | <p data-bbox="349 826 909 853"><b>Comparison of Exp. RTI values: Imidacloprid</b></p>  <p data-bbox="273 1417 990 1444">No groups have means significantly different from Lab 06</p>        | <table border="1"> <thead> <tr> <th>Institute</th> <th>Level of identification confidence</th> <th>Exp. tR</th> <th>Exp. RTI</th> <th>Pred. RTI</th> <th>ESI mode</th> <th>Application domain</th> <th>MCP</th> </tr> </thead> <tbody> <tr><td>Lab 6</td><td>1</td><td>4.74</td><td>262.47</td><td>248.89</td><td>+ESI</td><td>AD1</td><td>a</td></tr> <tr><td>Lab 5</td><td>N.D.</td><td>N.D.</td><td>N.D.</td><td>N.D.</td><td>N.D.</td><td>N.D.</td><td>N.D.</td></tr> <tr><td>Lab 4</td><td>1</td><td>7.55</td><td>383.99</td><td>248.89</td><td>+ESI</td><td>AD2</td><td>a</td></tr> <tr><td>Lab 12</td><td>2a</td><td>3.30</td><td>314.37</td><td>248.89</td><td>+ESI</td><td>AD1</td><td>a</td></tr> <tr><td>Lab 13</td><td>N.D.</td><td>N.D.</td><td>N.D.</td><td>N.D.</td><td>N.D.</td><td>N.D.</td><td>N.D.</td></tr> <tr><td>Lab 15</td><td>4</td><td>3.36</td><td>272.15</td><td>248.89</td><td>+ESI</td><td>AD1</td><td>a</td></tr> <tr><td>Lab 9</td><td>2</td><td>5.56</td><td>220.01</td><td>248.89</td><td>+ESI</td><td>AD1</td><td>a</td></tr> <tr><td>Lab 2</td><td>N.D.</td><td>N.D.</td><td>N.D.</td><td>N.D.</td><td>N.D.</td><td>N.D.</td><td>N.D.</td></tr> <tr><td>Lab 18</td><td>N.D.</td><td>N.D.</td><td>N.D.</td><td>N.D.</td><td>N.D.</td><td>N.D.</td><td>N.D.</td></tr> <tr><td>Lab 17</td><td>3</td><td>5.23</td><td>276.40</td><td>248.89</td><td>+ESI</td><td>AD1</td><td>a</td></tr> <tr><td>Lab 10</td><td>1</td><td>4.18</td><td>246.04</td><td>248.89</td><td>+ESI</td><td>AD1</td><td>a</td></tr> <tr><td>Lab 7</td><td>N.D.</td><td>N.D.</td><td>N.D.</td><td>N.D.</td><td>N.D.</td><td>N.D.</td><td>N.D.</td></tr> </tbody> </table> <p data-bbox="1003 1300 1644 1321">AD1: Exp. &amp; Pred. tR are accepted for this candidate (box1)</p> <p data-bbox="1003 1327 1895 1348">AD2: Although there is error, exp. &amp; pred. tR are accepted for this candidate (box2)</p> <p data-bbox="1003 1355 1211 1375">N.D.: Not detected.</p> <p data-bbox="1003 1382 2092 1442">All institutes have acceptable exp. RTI values and the difference is <b>not significant at 99% CIs</b> of the calibration curve. <b>Promote “Lab 15” &amp; “Lab 17” to level 2!</b></p>                                                       | Institute | Level of identification confidence | Exp. tR   | Exp. RTI | Pred. RTI          | ESI mode | Application domain | MCP | Lab 6 | 1    | 4.74 | 262.47 | 248.89 | +ESI | AD1  | a    | Lab 5 | N.D. | N.D. | N.D. | N.D. | N.D. | N.D. | N.D. | Lab 4 | 1    | 7.55 | 383.99 | 248.89 | +ESI | AD2  | a    | Lab 12 | 2a | 3.30 | 314.37 | 248.89 | +ESI | AD1 | a | Lab 13 | N.D. | N.D. | N.D. | N.D. | N.D. | N.D. | N.D. | Lab 15 | 4 | 3.36 | 272.15 | 248.89 | +ESI | AD1  | a | Lab 9 | 2    | 5.56 | 220.01 | 248.89 | +ESI | AD1  | a    | Lab 2 | N.D. | N.D. | N.D. | N.D. | N.D. | N.D. | N.D. | Lab 18 | N.D. | N.D. | N.D. | N.D. | N.D. | N.D. | N.D. | Lab 17 | 3    | 5.23 | 276.40 | 248.89 | +ESI | AD1  | a    | Lab 10 | 1    | 4.18 | 246.04 | 248.89 | +ESI | AD1  | a    | Lab 7 | N.D. | N.D. | N.D. | N.D. | N.D. | N.D. | N.D. |
|        | Institute                                                                                                                                                                                                                                                                     | Level of identification confidence                                                                                                                                                                                                                                                                                                                                                                                                                                                                                                                                                                                                                                                                                                                                                                                                                                                                                                                                                                                                                                                                                                                                                                                                                                                                                                                                                                                                                                                                                                                                                                                                                                                                                                                                                                                                                                                                                                                                                                                                                                                                                                                                                                                                                                | Exp. tR   | Exp. RTI                           | Pred. RTI | ESI mode | Application domain | MCP      |                    |     |       |      |      |        |        |      |      |      |       |      |      |      |      |      |      |      |       |      |      |        |        |      |      |      |        |    |      |        |        |      |     |   |        |      |      |      |      |      |      |      |        |   |      |        |        |      |      |   |       |      |      |        |        |      |      |      |       |      |      |      |      |      |      |      |        |      |      |      |      |      |      |      |        |      |      |        |        |      |      |      |        |      |      |        |        |      |      |      |       |      |      |      |      |      |      |      |
| Lab 6  | 1                                                                                                                                                                                                                                                                             | 4.74                                                                                                                                                                                                                                                                                                                                                                                                                                                                                                                                                                                                                                                                                                                                                                                                                                                                                                                                                                                                                                                                                                                                                                                                                                                                                                                                                                                                                                                                                                                                                                                                                                                                                                                                                                                                                                                                                                                                                                                                                                                                                                                                                                                                                                                              | 262.47    | 248.89                             | +ESI      | AD1      | a                  |          |                    |     |       |      |      |        |        |      |      |      |       |      |      |      |      |      |      |      |       |      |      |        |        |      |      |      |        |    |      |        |        |      |     |   |        |      |      |      |      |      |      |      |        |   |      |        |        |      |      |   |       |      |      |        |        |      |      |      |       |      |      |      |      |      |      |      |        |      |      |      |      |      |      |      |        |      |      |        |        |      |      |      |        |      |      |        |        |      |      |      |       |      |      |      |      |      |      |      |
| Lab 5  | N.D.                                                                                                                                                                                                                                                                          | N.D.                                                                                                                                                                                                                                                                                                                                                                                                                                                                                                                                                                                                                                                                                                                                                                                                                                                                                                                                                                                                                                                                                                                                                                                                                                                                                                                                                                                                                                                                                                                                                                                                                                                                                                                                                                                                                                                                                                                                                                                                                                                                                                                                                                                                                                                              | N.D.      | N.D.                               | N.D.      | N.D.     | N.D.               |          |                    |     |       |      |      |        |        |      |      |      |       |      |      |      |      |      |      |      |       |      |      |        |        |      |      |      |        |    |      |        |        |      |     |   |        |      |      |      |      |      |      |      |        |   |      |        |        |      |      |   |       |      |      |        |        |      |      |      |       |      |      |      |      |      |      |      |        |      |      |      |      |      |      |      |        |      |      |        |        |      |      |      |        |      |      |        |        |      |      |      |       |      |      |      |      |      |      |      |
| Lab 4  | 1                                                                                                                                                                                                                                                                             | 7.55                                                                                                                                                                                                                                                                                                                                                                                                                                                                                                                                                                                                                                                                                                                                                                                                                                                                                                                                                                                                                                                                                                                                                                                                                                                                                                                                                                                                                                                                                                                                                                                                                                                                                                                                                                                                                                                                                                                                                                                                                                                                                                                                                                                                                                                              | 383.99    | 248.89                             | +ESI      | AD2      | a                  |          |                    |     |       |      |      |        |        |      |      |      |       |      |      |      |      |      |      |      |       |      |      |        |        |      |      |      |        |    |      |        |        |      |     |   |        |      |      |      |      |      |      |      |        |   |      |        |        |      |      |   |       |      |      |        |        |      |      |      |       |      |      |      |      |      |      |      |        |      |      |      |      |      |      |      |        |      |      |        |        |      |      |      |        |      |      |        |        |      |      |      |       |      |      |      |      |      |      |      |
| Lab 12 | 2a                                                                                                                                                                                                                                                                            | 3.30                                                                                                                                                                                                                                                                                                                                                                                                                                                                                                                                                                                                                                                                                                                                                                                                                                                                                                                                                                                                                                                                                                                                                                                                                                                                                                                                                                                                                                                                                                                                                                                                                                                                                                                                                                                                                                                                                                                                                                                                                                                                                                                                                                                                                                                              | 314.37    | 248.89                             | +ESI      | AD1      | a                  |          |                    |     |       |      |      |        |        |      |      |      |       |      |      |      |      |      |      |      |       |      |      |        |        |      |      |      |        |    |      |        |        |      |     |   |        |      |      |      |      |      |      |      |        |   |      |        |        |      |      |   |       |      |      |        |        |      |      |      |       |      |      |      |      |      |      |      |        |      |      |      |      |      |      |      |        |      |      |        |        |      |      |      |        |      |      |        |        |      |      |      |       |      |      |      |      |      |      |      |
| Lab 13 | N.D.                                                                                                                                                                                                                                                                          | N.D.                                                                                                                                                                                                                                                                                                                                                                                                                                                                                                                                                                                                                                                                                                                                                                                                                                                                                                                                                                                                                                                                                                                                                                                                                                                                                                                                                                                                                                                                                                                                                                                                                                                                                                                                                                                                                                                                                                                                                                                                                                                                                                                                                                                                                                                              | N.D.      | N.D.                               | N.D.      | N.D.     | N.D.               |          |                    |     |       |      |      |        |        |      |      |      |       |      |      |      |      |      |      |      |       |      |      |        |        |      |      |      |        |    |      |        |        |      |     |   |        |      |      |      |      |      |      |      |        |   |      |        |        |      |      |   |       |      |      |        |        |      |      |      |       |      |      |      |      |      |      |      |        |      |      |      |      |      |      |      |        |      |      |        |        |      |      |      |        |      |      |        |        |      |      |      |       |      |      |      |      |      |      |      |
| Lab 15 | 4                                                                                                                                                                                                                                                                             | 3.36                                                                                                                                                                                                                                                                                                                                                                                                                                                                                                                                                                                                                                                                                                                                                                                                                                                                                                                                                                                                                                                                                                                                                                                                                                                                                                                                                                                                                                                                                                                                                                                                                                                                                                                                                                                                                                                                                                                                                                                                                                                                                                                                                                                                                                                              | 272.15    | 248.89                             | +ESI      | AD1      | a                  |          |                    |     |       |      |      |        |        |      |      |      |       |      |      |      |      |      |      |      |       |      |      |        |        |      |      |      |        |    |      |        |        |      |     |   |        |      |      |      |      |      |      |      |        |   |      |        |        |      |      |   |       |      |      |        |        |      |      |      |       |      |      |      |      |      |      |      |        |      |      |      |      |      |      |      |        |      |      |        |        |      |      |      |        |      |      |        |        |      |      |      |       |      |      |      |      |      |      |      |
| Lab 9  | 2                                                                                                                                                                                                                                                                             | 5.56                                                                                                                                                                                                                                                                                                                                                                                                                                                                                                                                                                                                                                                                                                                                                                                                                                                                                                                                                                                                                                                                                                                                                                                                                                                                                                                                                                                                                                                                                                                                                                                                                                                                                                                                                                                                                                                                                                                                                                                                                                                                                                                                                                                                                                                              | 220.01    | 248.89                             | +ESI      | AD1      | a                  |          |                    |     |       |      |      |        |        |      |      |      |       |      |      |      |      |      |      |      |       |      |      |        |        |      |      |      |        |    |      |        |        |      |     |   |        |      |      |      |      |      |      |      |        |   |      |        |        |      |      |   |       |      |      |        |        |      |      |      |       |      |      |      |      |      |      |      |        |      |      |      |      |      |      |      |        |      |      |        |        |      |      |      |        |      |      |        |        |      |      |      |       |      |      |      |      |      |      |      |
| Lab 2  | N.D.                                                                                                                                                                                                                                                                          | N.D.                                                                                                                                                                                                                                                                                                                                                                                                                                                                                                                                                                                                                                                                                                                                                                                                                                                                                                                                                                                                                                                                                                                                                                                                                                                                                                                                                                                                                                                                                                                                                                                                                                                                                                                                                                                                                                                                                                                                                                                                                                                                                                                                                                                                                                                              | N.D.      | N.D.                               | N.D.      | N.D.     | N.D.               |          |                    |     |       |      |      |        |        |      |      |      |       |      |      |      |      |      |      |      |       |      |      |        |        |      |      |      |        |    |      |        |        |      |     |   |        |      |      |      |      |      |      |      |        |   |      |        |        |      |      |   |       |      |      |        |        |      |      |      |       |      |      |      |      |      |      |      |        |      |      |      |      |      |      |      |        |      |      |        |        |      |      |      |        |      |      |        |        |      |      |      |       |      |      |      |      |      |      |      |
| Lab 18 | N.D.                                                                                                                                                                                                                                                                          | N.D.                                                                                                                                                                                                                                                                                                                                                                                                                                                                                                                                                                                                                                                                                                                                                                                                                                                                                                                                                                                                                                                                                                                                                                                                                                                                                                                                                                                                                                                                                                                                                                                                                                                                                                                                                                                                                                                                                                                                                                                                                                                                                                                                                                                                                                                              | N.D.      | N.D.                               | N.D.      | N.D.     | N.D.               |          |                    |     |       |      |      |        |        |      |      |      |       |      |      |      |      |      |      |      |       |      |      |        |        |      |      |      |        |    |      |        |        |      |     |   |        |      |      |      |      |      |      |      |        |   |      |        |        |      |      |   |       |      |      |        |        |      |      |      |       |      |      |      |      |      |      |      |        |      |      |      |      |      |      |      |        |      |      |        |        |      |      |      |        |      |      |        |        |      |      |      |       |      |      |      |      |      |      |      |
| Lab 17 | 3                                                                                                                                                                                                                                                                             | 5.23                                                                                                                                                                                                                                                                                                                                                                                                                                                                                                                                                                                                                                                                                                                                                                                                                                                                                                                                                                                                                                                                                                                                                                                                                                                                                                                                                                                                                                                                                                                                                                                                                                                                                                                                                                                                                                                                                                                                                                                                                                                                                                                                                                                                                                                              | 276.40    | 248.89                             | +ESI      | AD1      | a                  |          |                    |     |       |      |      |        |        |      |      |      |       |      |      |      |      |      |      |      |       |      |      |        |        |      |      |      |        |    |      |        |        |      |     |   |        |      |      |      |      |      |      |      |        |   |      |        |        |      |      |   |       |      |      |        |        |      |      |      |       |      |      |      |      |      |      |      |        |      |      |      |      |      |      |      |        |      |      |        |        |      |      |      |        |      |      |        |        |      |      |      |       |      |      |      |      |      |      |      |
| Lab 10 | 1                                                                                                                                                                                                                                                                             | 4.18                                                                                                                                                                                                                                                                                                                                                                                                                                                                                                                                                                                                                                                                                                                                                                                                                                                                                                                                                                                                                                                                                                                                                                                                                                                                                                                                                                                                                                                                                                                                                                                                                                                                                                                                                                                                                                                                                                                                                                                                                                                                                                                                                                                                                                                              | 246.04    | 248.89                             | +ESI      | AD1      | a                  |          |                    |     |       |      |      |        |        |      |      |      |       |      |      |      |      |      |      |      |       |      |      |        |        |      |      |      |        |    |      |        |        |      |     |   |        |      |      |      |      |      |      |      |        |   |      |        |        |      |      |   |       |      |      |        |        |      |      |      |       |      |      |      |      |      |      |      |        |      |      |      |      |      |      |      |        |      |      |        |        |      |      |      |        |      |      |        |        |      |      |      |       |      |      |      |      |      |      |      |
| Lab 7  | N.D.                                                                                                                                                                                                                                                                          | N.D.                                                                                                                                                                                                                                                                                                                                                                                                                                                                                                                                                                                                                                                                                                                                                                                                                                                                                                                                                                                                                                                                                                                                                                                                                                                                                                                                                                                                                                                                                                                                                                                                                                                                                                                                                                                                                                                                                                                                                                                                                                                                                                                                                                                                                                                              | N.D.      | N.D.                               | N.D.      | N.D.     | N.D.               |          |                    |     |       |      |      |        |        |      |      |      |       |      |      |      |      |      |      |      |       |      |      |        |        |      |      |      |        |    |      |        |        |      |     |   |        |      |      |      |      |      |      |      |        |   |      |        |        |      |      |   |       |      |      |        |        |      |      |      |       |      |      |      |      |      |      |      |        |      |      |      |      |      |      |      |        |      |      |        |        |      |      |      |        |      |      |        |        |      |      |      |       |      |      |      |      |      |      |      |



| No.       | multiple comparison procedure plot                                                                                                                                                                             | RTI details                                                                                                                                                                                                                                                                                                                                                                                                                                                                                                                                                                                                                                                                                                                                                                                                                                                                                                                                                                                                                                                                                                                                                                                                                                                                                                                                                                                                                                                                                                                                                                                                                                                                                                                                                                                                                                                                                                                                                                                                                                                                                                                                                                                                                 |           |                                    |          |                    |           |          |                    |     |       |    |      |        |        |      |      |   |       |      |      |        |        |      |      |      |       |   |       |        |        |      |     |   |        |      |      |        |        |      |      |      |        |      |      |      |      |      |      |      |        |      |      |        |        |      |      |      |       |      |      |      |      |      |      |      |       |      |      |      |      |      |      |      |        |      |      |      |      |      |      |      |        |      |       |        |        |      |      |      |        |      |      |        |        |      |      |      |       |      |      |      |      |      |      |      |
|-----------|----------------------------------------------------------------------------------------------------------------------------------------------------------------------------------------------------------------|-----------------------------------------------------------------------------------------------------------------------------------------------------------------------------------------------------------------------------------------------------------------------------------------------------------------------------------------------------------------------------------------------------------------------------------------------------------------------------------------------------------------------------------------------------------------------------------------------------------------------------------------------------------------------------------------------------------------------------------------------------------------------------------------------------------------------------------------------------------------------------------------------------------------------------------------------------------------------------------------------------------------------------------------------------------------------------------------------------------------------------------------------------------------------------------------------------------------------------------------------------------------------------------------------------------------------------------------------------------------------------------------------------------------------------------------------------------------------------------------------------------------------------------------------------------------------------------------------------------------------------------------------------------------------------------------------------------------------------------------------------------------------------------------------------------------------------------------------------------------------------------------------------------------------------------------------------------------------------------------------------------------------------------------------------------------------------------------------------------------------------------------------------------------------------------------------------------------------------|-----------|------------------------------------|----------|--------------------|-----------|----------|--------------------|-----|-------|----|------|--------|--------|------|------|---|-------|------|------|--------|--------|------|------|------|-------|---|-------|--------|--------|------|-----|---|--------|------|------|--------|--------|------|------|------|--------|------|------|------|------|------|------|------|--------|------|------|--------|--------|------|------|------|-------|------|------|------|------|------|------|------|-------|------|------|------|------|------|------|------|--------|------|------|------|------|------|------|------|--------|------|-------|--------|--------|------|------|------|--------|------|------|--------|--------|------|------|------|-------|------|------|------|------|------|------|------|
| (28)      | <p style="text-align: center;"><b>Comparison of Exp. RTI values: Diuron</b></p> <p style="text-align: center;">No groups have means significantly different from Lab 06</p>                                    | <table border="1"> <thead> <tr> <th>Institute</th> <th>Level of identification confidence</th> <th>Exp. tR</th> <th>Exp. RTI</th> <th>Pred. RTI</th> <th>ESI mode</th> <th>Application domain</th> <th>MCP</th> </tr> </thead> <tbody> <tr><td>Lab 6</td><td>1</td><td>8.63</td><td>559.05</td><td>550.53</td><td>+ESI</td><td>AD1</td><td>a</td></tr> <tr><td>Lab 5</td><td>N.D.</td><td>N.D.</td><td>N.D.</td><td>N.D.</td><td>N.D.</td><td>N.D.</td><td>N.D.</td></tr> <tr><td>Lab 4</td><td>1</td><td>10.48</td><td>566.55</td><td>550.53</td><td>+ESI</td><td>AD1</td><td>a</td></tr> <tr><td>Lab 12</td><td>N.D.</td><td>N.D.</td><td>N.D.</td><td>N.D.</td><td>N.D.</td><td>N.D.</td><td>N.D.</td></tr> <tr><td>Lab 13</td><td>N.D.</td><td>N.D.</td><td>N.D.</td><td>N.D.</td><td>N.D.</td><td>N.D.</td><td>N.D.</td></tr> <tr><td>Lab 15</td><td>N.D.</td><td>N.D.</td><td>N.D.</td><td>N.D.</td><td>N.D.</td><td>N.D.</td><td>N.D.</td></tr> <tr><td>Lab 9</td><td>N.D.</td><td>N.D.</td><td>N.D.</td><td>N.D.</td><td>N.D.</td><td>N.D.</td><td>N.D.</td></tr> <tr><td>Lab 2</td><td>N.D.</td><td>N.D.</td><td>N.D.</td><td>N.D.</td><td>N.D.</td><td>N.D.</td><td>N.D.</td></tr> <tr><td>Lab 18</td><td>N.D.</td><td>N.D.</td><td>N.D.</td><td>N.D.</td><td>N.D.</td><td>N.D.</td><td>N.D.</td></tr> <tr><td>Lab 17</td><td>1</td><td>10.11</td><td>563.60</td><td>570.79</td><td>+ESI</td><td>AD1</td><td>a</td></tr> <tr><td>Lab 10</td><td>1</td><td>9.21</td><td>564.63</td><td>550.53</td><td>+ESI</td><td>AD1</td><td>a</td></tr> <tr><td>Lab 7</td><td>N.D.</td><td>N.D.</td><td>N.D.</td><td>N.D.</td><td>N.D.</td><td>N.D.</td><td>N.D.</td></tr> </tbody> </table> <p>AD1: Exp. &amp; Pred. tR are accepted for this candidate (box1)<br/> N.D.: Not detected.</p> <p>All institutes have acceptable exp. RTI values and the difference is <b>not significant at 99% CIs</b> of the calibration curve.</p>                                                                                                                                                                                                                                                                                            | Institute | Level of identification confidence | Exp. tR  | Exp. RTI           | Pred. RTI | ESI mode | Application domain | MCP | Lab 6 | 1  | 8.63 | 559.05 | 550.53 | +ESI | AD1  | a | Lab 5 | N.D. | N.D. | N.D.   | N.D.   | N.D. | N.D. | N.D. | Lab 4 | 1 | 10.48 | 566.55 | 550.53 | +ESI | AD1 | a | Lab 12 | N.D. | N.D. | N.D.   | N.D.   | N.D. | N.D. | N.D. | Lab 13 | N.D. | N.D. | N.D. | N.D. | N.D. | N.D. | N.D. | Lab 15 | N.D. | N.D. | N.D.   | N.D.   | N.D. | N.D. | N.D. | Lab 9 | N.D. | N.D. | N.D. | N.D. | N.D. | N.D. | N.D. | Lab 2 | N.D. | N.D. | N.D. | N.D. | N.D. | N.D. | N.D. | Lab 18 | N.D. | N.D. | N.D. | N.D. | N.D. | N.D. | N.D. | Lab 17 | 1    | 10.11 | 563.60 | 570.79 | +ESI | AD1  | a    | Lab 10 | 1    | 9.21 | 564.63 | 550.53 | +ESI | AD1  | a    | Lab 7 | N.D. | N.D. | N.D. | N.D. | N.D. | N.D. | N.D. |
| Institute | Level of identification confidence                                                                                                                                                                             | Exp. tR                                                                                                                                                                                                                                                                                                                                                                                                                                                                                                                                                                                                                                                                                                                                                                                                                                                                                                                                                                                                                                                                                                                                                                                                                                                                                                                                                                                                                                                                                                                                                                                                                                                                                                                                                                                                                                                                                                                                                                                                                                                                                                                                                                                                                     | Exp. RTI  | Pred. RTI                          | ESI mode | Application domain | MCP       |          |                    |     |       |    |      |        |        |      |      |   |       |      |      |        |        |      |      |      |       |   |       |        |        |      |     |   |        |      |      |        |        |      |      |      |        |      |      |      |      |      |      |      |        |      |      |        |        |      |      |      |       |      |      |      |      |      |      |      |       |      |      |      |      |      |      |      |        |      |      |      |      |      |      |      |        |      |       |        |        |      |      |      |        |      |      |        |        |      |      |      |       |      |      |      |      |      |      |      |
| Lab 6     | 1                                                                                                                                                                                                              | 8.63                                                                                                                                                                                                                                                                                                                                                                                                                                                                                                                                                                                                                                                                                                                                                                                                                                                                                                                                                                                                                                                                                                                                                                                                                                                                                                                                                                                                                                                                                                                                                                                                                                                                                                                                                                                                                                                                                                                                                                                                                                                                                                                                                                                                                        | 559.05    | 550.53                             | +ESI     | AD1                | a         |          |                    |     |       |    |      |        |        |      |      |   |       |      |      |        |        |      |      |      |       |   |       |        |        |      |     |   |        |      |      |        |        |      |      |      |        |      |      |      |      |      |      |      |        |      |      |        |        |      |      |      |       |      |      |      |      |      |      |      |       |      |      |      |      |      |      |      |        |      |      |      |      |      |      |      |        |      |       |        |        |      |      |      |        |      |      |        |        |      |      |      |       |      |      |      |      |      |      |      |
| Lab 5     | N.D.                                                                                                                                                                                                           | N.D.                                                                                                                                                                                                                                                                                                                                                                                                                                                                                                                                                                                                                                                                                                                                                                                                                                                                                                                                                                                                                                                                                                                                                                                                                                                                                                                                                                                                                                                                                                                                                                                                                                                                                                                                                                                                                                                                                                                                                                                                                                                                                                                                                                                                                        | N.D.      | N.D.                               | N.D.     | N.D.               | N.D.      |          |                    |     |       |    |      |        |        |      |      |   |       |      |      |        |        |      |      |      |       |   |       |        |        |      |     |   |        |      |      |        |        |      |      |      |        |      |      |      |      |      |      |      |        |      |      |        |        |      |      |      |       |      |      |      |      |      |      |      |       |      |      |      |      |      |      |      |        |      |      |      |      |      |      |      |        |      |       |        |        |      |      |      |        |      |      |        |        |      |      |      |       |      |      |      |      |      |      |      |
| Lab 4     | 1                                                                                                                                                                                                              | 10.48                                                                                                                                                                                                                                                                                                                                                                                                                                                                                                                                                                                                                                                                                                                                                                                                                                                                                                                                                                                                                                                                                                                                                                                                                                                                                                                                                                                                                                                                                                                                                                                                                                                                                                                                                                                                                                                                                                                                                                                                                                                                                                                                                                                                                       | 566.55    | 550.53                             | +ESI     | AD1                | a         |          |                    |     |       |    |      |        |        |      |      |   |       |      |      |        |        |      |      |      |       |   |       |        |        |      |     |   |        |      |      |        |        |      |      |      |        |      |      |      |      |      |      |      |        |      |      |        |        |      |      |      |       |      |      |      |      |      |      |      |       |      |      |      |      |      |      |      |        |      |      |      |      |      |      |      |        |      |       |        |        |      |      |      |        |      |      |        |        |      |      |      |       |      |      |      |      |      |      |      |
| Lab 12    | N.D.                                                                                                                                                                                                           | N.D.                                                                                                                                                                                                                                                                                                                                                                                                                                                                                                                                                                                                                                                                                                                                                                                                                                                                                                                                                                                                                                                                                                                                                                                                                                                                                                                                                                                                                                                                                                                                                                                                                                                                                                                                                                                                                                                                                                                                                                                                                                                                                                                                                                                                                        | N.D.      | N.D.                               | N.D.     | N.D.               | N.D.      |          |                    |     |       |    |      |        |        |      |      |   |       |      |      |        |        |      |      |      |       |   |       |        |        |      |     |   |        |      |      |        |        |      |      |      |        |      |      |      |      |      |      |      |        |      |      |        |        |      |      |      |       |      |      |      |      |      |      |      |       |      |      |      |      |      |      |      |        |      |      |      |      |      |      |      |        |      |       |        |        |      |      |      |        |      |      |        |        |      |      |      |       |      |      |      |      |      |      |      |
| Lab 13    | N.D.                                                                                                                                                                                                           | N.D.                                                                                                                                                                                                                                                                                                                                                                                                                                                                                                                                                                                                                                                                                                                                                                                                                                                                                                                                                                                                                                                                                                                                                                                                                                                                                                                                                                                                                                                                                                                                                                                                                                                                                                                                                                                                                                                                                                                                                                                                                                                                                                                                                                                                                        | N.D.      | N.D.                               | N.D.     | N.D.               | N.D.      |          |                    |     |       |    |      |        |        |      |      |   |       |      |      |        |        |      |      |      |       |   |       |        |        |      |     |   |        |      |      |        |        |      |      |      |        |      |      |      |      |      |      |      |        |      |      |        |        |      |      |      |       |      |      |      |      |      |      |      |       |      |      |      |      |      |      |      |        |      |      |      |      |      |      |      |        |      |       |        |        |      |      |      |        |      |      |        |        |      |      |      |       |      |      |      |      |      |      |      |
| Lab 15    | N.D.                                                                                                                                                                                                           | N.D.                                                                                                                                                                                                                                                                                                                                                                                                                                                                                                                                                                                                                                                                                                                                                                                                                                                                                                                                                                                                                                                                                                                                                                                                                                                                                                                                                                                                                                                                                                                                                                                                                                                                                                                                                                                                                                                                                                                                                                                                                                                                                                                                                                                                                        | N.D.      | N.D.                               | N.D.     | N.D.               | N.D.      |          |                    |     |       |    |      |        |        |      |      |   |       |      |      |        |        |      |      |      |       |   |       |        |        |      |     |   |        |      |      |        |        |      |      |      |        |      |      |      |      |      |      |      |        |      |      |        |        |      |      |      |       |      |      |      |      |      |      |      |       |      |      |      |      |      |      |      |        |      |      |      |      |      |      |      |        |      |       |        |        |      |      |      |        |      |      |        |        |      |      |      |       |      |      |      |      |      |      |      |
| Lab 9     | N.D.                                                                                                                                                                                                           | N.D.                                                                                                                                                                                                                                                                                                                                                                                                                                                                                                                                                                                                                                                                                                                                                                                                                                                                                                                                                                                                                                                                                                                                                                                                                                                                                                                                                                                                                                                                                                                                                                                                                                                                                                                                                                                                                                                                                                                                                                                                                                                                                                                                                                                                                        | N.D.      | N.D.                               | N.D.     | N.D.               | N.D.      |          |                    |     |       |    |      |        |        |      |      |   |       |      |      |        |        |      |      |      |       |   |       |        |        |      |     |   |        |      |      |        |        |      |      |      |        |      |      |      |      |      |      |      |        |      |      |        |        |      |      |      |       |      |      |      |      |      |      |      |       |      |      |      |      |      |      |      |        |      |      |      |      |      |      |      |        |      |       |        |        |      |      |      |        |      |      |        |        |      |      |      |       |      |      |      |      |      |      |      |
| Lab 2     | N.D.                                                                                                                                                                                                           | N.D.                                                                                                                                                                                                                                                                                                                                                                                                                                                                                                                                                                                                                                                                                                                                                                                                                                                                                                                                                                                                                                                                                                                                                                                                                                                                                                                                                                                                                                                                                                                                                                                                                                                                                                                                                                                                                                                                                                                                                                                                                                                                                                                                                                                                                        | N.D.      | N.D.                               | N.D.     | N.D.               | N.D.      |          |                    |     |       |    |      |        |        |      |      |   |       |      |      |        |        |      |      |      |       |   |       |        |        |      |     |   |        |      |      |        |        |      |      |      |        |      |      |      |      |      |      |      |        |      |      |        |        |      |      |      |       |      |      |      |      |      |      |      |       |      |      |      |      |      |      |      |        |      |      |      |      |      |      |      |        |      |       |        |        |      |      |      |        |      |      |        |        |      |      |      |       |      |      |      |      |      |      |      |
| Lab 18    | N.D.                                                                                                                                                                                                           | N.D.                                                                                                                                                                                                                                                                                                                                                                                                                                                                                                                                                                                                                                                                                                                                                                                                                                                                                                                                                                                                                                                                                                                                                                                                                                                                                                                                                                                                                                                                                                                                                                                                                                                                                                                                                                                                                                                                                                                                                                                                                                                                                                                                                                                                                        | N.D.      | N.D.                               | N.D.     | N.D.               | N.D.      |          |                    |     |       |    |      |        |        |      |      |   |       |      |      |        |        |      |      |      |       |   |       |        |        |      |     |   |        |      |      |        |        |      |      |      |        |      |      |      |      |      |      |      |        |      |      |        |        |      |      |      |       |      |      |      |      |      |      |      |       |      |      |      |      |      |      |      |        |      |      |      |      |      |      |      |        |      |       |        |        |      |      |      |        |      |      |        |        |      |      |      |       |      |      |      |      |      |      |      |
| Lab 17    | 1                                                                                                                                                                                                              | 10.11                                                                                                                                                                                                                                                                                                                                                                                                                                                                                                                                                                                                                                                                                                                                                                                                                                                                                                                                                                                                                                                                                                                                                                                                                                                                                                                                                                                                                                                                                                                                                                                                                                                                                                                                                                                                                                                                                                                                                                                                                                                                                                                                                                                                                       | 563.60    | 570.79                             | +ESI     | AD1                | a         |          |                    |     |       |    |      |        |        |      |      |   |       |      |      |        |        |      |      |      |       |   |       |        |        |      |     |   |        |      |      |        |        |      |      |      |        |      |      |      |      |      |      |      |        |      |      |        |        |      |      |      |       |      |      |      |      |      |      |      |       |      |      |      |      |      |      |      |        |      |      |      |      |      |      |      |        |      |       |        |        |      |      |      |        |      |      |        |        |      |      |      |       |      |      |      |      |      |      |      |
| Lab 10    | 1                                                                                                                                                                                                              | 9.21                                                                                                                                                                                                                                                                                                                                                                                                                                                                                                                                                                                                                                                                                                                                                                                                                                                                                                                                                                                                                                                                                                                                                                                                                                                                                                                                                                                                                                                                                                                                                                                                                                                                                                                                                                                                                                                                                                                                                                                                                                                                                                                                                                                                                        | 564.63    | 550.53                             | +ESI     | AD1                | a         |          |                    |     |       |    |      |        |        |      |      |   |       |      |      |        |        |      |      |      |       |   |       |        |        |      |     |   |        |      |      |        |        |      |      |      |        |      |      |      |      |      |      |      |        |      |      |        |        |      |      |      |       |      |      |      |      |      |      |      |       |      |      |      |      |      |      |      |        |      |      |      |      |      |      |      |        |      |       |        |        |      |      |      |        |      |      |        |        |      |      |      |       |      |      |      |      |      |      |      |
| Lab 7     | N.D.                                                                                                                                                                                                           | N.D.                                                                                                                                                                                                                                                                                                                                                                                                                                                                                                                                                                                                                                                                                                                                                                                                                                                                                                                                                                                                                                                                                                                                                                                                                                                                                                                                                                                                                                                                                                                                                                                                                                                                                                                                                                                                                                                                                                                                                                                                                                                                                                                                                                                                                        | N.D.      | N.D.                               | N.D.     | N.D.               | N.D.      |          |                    |     |       |    |      |        |        |      |      |   |       |      |      |        |        |      |      |      |       |   |       |        |        |      |     |   |        |      |      |        |        |      |      |      |        |      |      |      |      |      |      |      |        |      |      |        |        |      |      |      |       |      |      |      |      |      |      |      |       |      |      |      |      |      |      |      |        |      |      |      |      |      |      |      |        |      |       |        |        |      |      |      |        |      |      |        |        |      |      |      |       |      |      |      |      |      |      |      |
| (29)      | <p style="text-align: center;"><b>Comparison of Exp. RTI values: 3,6,9,12,15-pentaoxaheptadecane-1,17-diol</b></p> <p style="text-align: center;">No groups have means significantly different from Lab 06</p> | <table border="1"> <thead> <tr> <th>Institute</th> <th>Level of identification confidence</th> <th>Exp. tR</th> <th>Exp. RTI</th> <th>Pred. RTI</th> <th>ESI mode</th> <th>Application domain</th> <th>MCP</th> </tr> </thead> <tbody> <tr><td>Lab 6</td><td>2a</td><td>3.79</td><td>189.91</td><td>498.74</td><td>+ESI</td><td>AD4a</td><td>a</td></tr> <tr><td>Lab 5</td><td>2a</td><td>6.63</td><td>245.11</td><td>498.74</td><td>+ESI</td><td>AD3</td><td>a</td></tr> <tr><td>Lab 4</td><td>3</td><td>5.60</td><td>262.49</td><td>498.74</td><td>+ESI</td><td>AD3</td><td>a</td></tr> <tr><td>Lab 12</td><td>2a</td><td>2.30</td><td>204.22</td><td>498.74</td><td>+ESI</td><td>AD4a</td><td>a</td></tr> <tr><td>Lab 13</td><td>N.D.</td><td>N.D.</td><td>N.D.</td><td>N.D.</td><td>N.D.</td><td>N.D.</td><td>N.D.</td></tr> <tr><td>Lab 15</td><td>3</td><td>2.67</td><td>214.23</td><td>498.74</td><td>+ESI</td><td>AD4a</td><td>a</td></tr> <tr><td>Lab 9</td><td>N.D.</td><td>N.D.</td><td>N.D.</td><td>N.D.</td><td>N.D.</td><td>N.D.</td><td>N.D.</td></tr> <tr><td>Lab 2</td><td>N.D.</td><td>N.D.</td><td>N.D.</td><td>N.D.</td><td>N.D.</td><td>N.D.</td><td>N.D.</td></tr> <tr><td>Lab 18</td><td>N.D.</td><td>N.D.</td><td>N.D.</td><td>N.D.</td><td>N.D.</td><td>N.D.</td><td>N.D.</td></tr> <tr><td>Lab 17</td><td>N.D.</td><td>N.D.</td><td>N.D.</td><td>N.D.</td><td>N.D.</td><td>N.D.</td><td>N.D.</td></tr> <tr><td>Lab 10</td><td>N.D.</td><td>N.D.</td><td>N.D.</td><td>N.D.</td><td>N.D.</td><td>N.D.</td><td>N.D.</td></tr> <tr><td>Lab 7</td><td>N.D.</td><td>N.D.</td><td>N.D.</td><td>N.D.</td><td>N.D.</td><td>N.D.</td><td>N.D.</td></tr> </tbody> </table> <p>AD3: Pred./Exp. tR are not reliable (high SR; use other verification tools (box3))<br/> AD4a: Pred./Exp. tR are not reliable (Outside the applicability domain and high SR; use other verification tools (box4))<br/> N.D.: Not detected.</p> <p>Note: This compound is outside of AD of models, but the exp. RTI is comparable. All institutes have acceptable exp. RTI values and the difference is <b>not significant at 99% CIs</b> of the calibration curve.</p> <p><b>Promote “Lab 15” &amp; “Lab 4” to level 2!</b></p> | Institute | Level of identification confidence | Exp. tR  | Exp. RTI           | Pred. RTI | ESI mode | Application domain | MCP | Lab 6 | 2a | 3.79 | 189.91 | 498.74 | +ESI | AD4a | a | Lab 5 | 2a   | 6.63 | 245.11 | 498.74 | +ESI | AD3  | a    | Lab 4 | 3 | 5.60  | 262.49 | 498.74 | +ESI | AD3 | a | Lab 12 | 2a   | 2.30 | 204.22 | 498.74 | +ESI | AD4a | a    | Lab 13 | N.D. | N.D. | N.D. | N.D. | N.D. | N.D. | N.D. | Lab 15 | 3    | 2.67 | 214.23 | 498.74 | +ESI | AD4a | a    | Lab 9 | N.D. | N.D. | N.D. | N.D. | N.D. | N.D. | N.D. | Lab 2 | N.D. | N.D. | N.D. | N.D. | N.D. | N.D. | N.D. | Lab 18 | N.D. | N.D. | N.D. | N.D. | N.D. | N.D. | N.D. | Lab 17 | N.D. | N.D.  | N.D.   | N.D.   | N.D. | N.D. | N.D. | Lab 10 | N.D. | N.D. | N.D.   | N.D.   | N.D. | N.D. | N.D. | Lab 7 | N.D. | N.D. | N.D. | N.D. | N.D. | N.D. | N.D. |
| Institute | Level of identification confidence                                                                                                                                                                             | Exp. tR                                                                                                                                                                                                                                                                                                                                                                                                                                                                                                                                                                                                                                                                                                                                                                                                                                                                                                                                                                                                                                                                                                                                                                                                                                                                                                                                                                                                                                                                                                                                                                                                                                                                                                                                                                                                                                                                                                                                                                                                                                                                                                                                                                                                                     | Exp. RTI  | Pred. RTI                          | ESI mode | Application domain | MCP       |          |                    |     |       |    |      |        |        |      |      |   |       |      |      |        |        |      |      |      |       |   |       |        |        |      |     |   |        |      |      |        |        |      |      |      |        |      |      |      |      |      |      |      |        |      |      |        |        |      |      |      |       |      |      |      |      |      |      |      |       |      |      |      |      |      |      |      |        |      |      |      |      |      |      |      |        |      |       |        |        |      |      |      |        |      |      |        |        |      |      |      |       |      |      |      |      |      |      |      |
| Lab 6     | 2a                                                                                                                                                                                                             | 3.79                                                                                                                                                                                                                                                                                                                                                                                                                                                                                                                                                                                                                                                                                                                                                                                                                                                                                                                                                                                                                                                                                                                                                                                                                                                                                                                                                                                                                                                                                                                                                                                                                                                                                                                                                                                                                                                                                                                                                                                                                                                                                                                                                                                                                        | 189.91    | 498.74                             | +ESI     | AD4a               | a         |          |                    |     |       |    |      |        |        |      |      |   |       |      |      |        |        |      |      |      |       |   |       |        |        |      |     |   |        |      |      |        |        |      |      |      |        |      |      |      |      |      |      |      |        |      |      |        |        |      |      |      |       |      |      |      |      |      |      |      |       |      |      |      |      |      |      |      |        |      |      |      |      |      |      |      |        |      |       |        |        |      |      |      |        |      |      |        |        |      |      |      |       |      |      |      |      |      |      |      |
| Lab 5     | 2a                                                                                                                                                                                                             | 6.63                                                                                                                                                                                                                                                                                                                                                                                                                                                                                                                                                                                                                                                                                                                                                                                                                                                                                                                                                                                                                                                                                                                                                                                                                                                                                                                                                                                                                                                                                                                                                                                                                                                                                                                                                                                                                                                                                                                                                                                                                                                                                                                                                                                                                        | 245.11    | 498.74                             | +ESI     | AD3                | a         |          |                    |     |       |    |      |        |        |      |      |   |       |      |      |        |        |      |      |      |       |   |       |        |        |      |     |   |        |      |      |        |        |      |      |      |        |      |      |      |      |      |      |      |        |      |      |        |        |      |      |      |       |      |      |      |      |      |      |      |       |      |      |      |      |      |      |      |        |      |      |      |      |      |      |      |        |      |       |        |        |      |      |      |        |      |      |        |        |      |      |      |       |      |      |      |      |      |      |      |
| Lab 4     | 3                                                                                                                                                                                                              | 5.60                                                                                                                                                                                                                                                                                                                                                                                                                                                                                                                                                                                                                                                                                                                                                                                                                                                                                                                                                                                                                                                                                                                                                                                                                                                                                                                                                                                                                                                                                                                                                                                                                                                                                                                                                                                                                                                                                                                                                                                                                                                                                                                                                                                                                        | 262.49    | 498.74                             | +ESI     | AD3                | a         |          |                    |     |       |    |      |        |        |      |      |   |       |      |      |        |        |      |      |      |       |   |       |        |        |      |     |   |        |      |      |        |        |      |      |      |        |      |      |      |      |      |      |      |        |      |      |        |        |      |      |      |       |      |      |      |      |      |      |      |       |      |      |      |      |      |      |      |        |      |      |      |      |      |      |      |        |      |       |        |        |      |      |      |        |      |      |        |        |      |      |      |       |      |      |      |      |      |      |      |
| Lab 12    | 2a                                                                                                                                                                                                             | 2.30                                                                                                                                                                                                                                                                                                                                                                                                                                                                                                                                                                                                                                                                                                                                                                                                                                                                                                                                                                                                                                                                                                                                                                                                                                                                                                                                                                                                                                                                                                                                                                                                                                                                                                                                                                                                                                                                                                                                                                                                                                                                                                                                                                                                                        | 204.22    | 498.74                             | +ESI     | AD4a               | a         |          |                    |     |       |    |      |        |        |      |      |   |       |      |      |        |        |      |      |      |       |   |       |        |        |      |     |   |        |      |      |        |        |      |      |      |        |      |      |      |      |      |      |      |        |      |      |        |        |      |      |      |       |      |      |      |      |      |      |      |       |      |      |      |      |      |      |      |        |      |      |      |      |      |      |      |        |      |       |        |        |      |      |      |        |      |      |        |        |      |      |      |       |      |      |      |      |      |      |      |
| Lab 13    | N.D.                                                                                                                                                                                                           | N.D.                                                                                                                                                                                                                                                                                                                                                                                                                                                                                                                                                                                                                                                                                                                                                                                                                                                                                                                                                                                                                                                                                                                                                                                                                                                                                                                                                                                                                                                                                                                                                                                                                                                                                                                                                                                                                                                                                                                                                                                                                                                                                                                                                                                                                        | N.D.      | N.D.                               | N.D.     | N.D.               | N.D.      |          |                    |     |       |    |      |        |        |      |      |   |       |      |      |        |        |      |      |      |       |   |       |        |        |      |     |   |        |      |      |        |        |      |      |      |        |      |      |      |      |      |      |      |        |      |      |        |        |      |      |      |       |      |      |      |      |      |      |      |       |      |      |      |      |      |      |      |        |      |      |      |      |      |      |      |        |      |       |        |        |      |      |      |        |      |      |        |        |      |      |      |       |      |      |      |      |      |      |      |
| Lab 15    | 3                                                                                                                                                                                                              | 2.67                                                                                                                                                                                                                                                                                                                                                                                                                                                                                                                                                                                                                                                                                                                                                                                                                                                                                                                                                                                                                                                                                                                                                                                                                                                                                                                                                                                                                                                                                                                                                                                                                                                                                                                                                                                                                                                                                                                                                                                                                                                                                                                                                                                                                        | 214.23    | 498.74                             | +ESI     | AD4a               | a         |          |                    |     |       |    |      |        |        |      |      |   |       |      |      |        |        |      |      |      |       |   |       |        |        |      |     |   |        |      |      |        |        |      |      |      |        |      |      |      |      |      |      |      |        |      |      |        |        |      |      |      |       |      |      |      |      |      |      |      |       |      |      |      |      |      |      |      |        |      |      |      |      |      |      |      |        |      |       |        |        |      |      |      |        |      |      |        |        |      |      |      |       |      |      |      |      |      |      |      |
| Lab 9     | N.D.                                                                                                                                                                                                           | N.D.                                                                                                                                                                                                                                                                                                                                                                                                                                                                                                                                                                                                                                                                                                                                                                                                                                                                                                                                                                                                                                                                                                                                                                                                                                                                                                                                                                                                                                                                                                                                                                                                                                                                                                                                                                                                                                                                                                                                                                                                                                                                                                                                                                                                                        | N.D.      | N.D.                               | N.D.     | N.D.               | N.D.      |          |                    |     |       |    |      |        |        |      |      |   |       |      |      |        |        |      |      |      |       |   |       |        |        |      |     |   |        |      |      |        |        |      |      |      |        |      |      |      |      |      |      |      |        |      |      |        |        |      |      |      |       |      |      |      |      |      |      |      |       |      |      |      |      |      |      |      |        |      |      |      |      |      |      |      |        |      |       |        |        |      |      |      |        |      |      |        |        |      |      |      |       |      |      |      |      |      |      |      |
| Lab 2     | N.D.                                                                                                                                                                                                           | N.D.                                                                                                                                                                                                                                                                                                                                                                                                                                                                                                                                                                                                                                                                                                                                                                                                                                                                                                                                                                                                                                                                                                                                                                                                                                                                                                                                                                                                                                                                                                                                                                                                                                                                                                                                                                                                                                                                                                                                                                                                                                                                                                                                                                                                                        | N.D.      | N.D.                               | N.D.     | N.D.               | N.D.      |          |                    |     |       |    |      |        |        |      |      |   |       |      |      |        |        |      |      |      |       |   |       |        |        |      |     |   |        |      |      |        |        |      |      |      |        |      |      |      |      |      |      |      |        |      |      |        |        |      |      |      |       |      |      |      |      |      |      |      |       |      |      |      |      |      |      |      |        |      |      |      |      |      |      |      |        |      |       |        |        |      |      |      |        |      |      |        |        |      |      |      |       |      |      |      |      |      |      |      |
| Lab 18    | N.D.                                                                                                                                                                                                           | N.D.                                                                                                                                                                                                                                                                                                                                                                                                                                                                                                                                                                                                                                                                                                                                                                                                                                                                                                                                                                                                                                                                                                                                                                                                                                                                                                                                                                                                                                                                                                                                                                                                                                                                                                                                                                                                                                                                                                                                                                                                                                                                                                                                                                                                                        | N.D.      | N.D.                               | N.D.     | N.D.               | N.D.      |          |                    |     |       |    |      |        |        |      |      |   |       |      |      |        |        |      |      |      |       |   |       |        |        |      |     |   |        |      |      |        |        |      |      |      |        |      |      |      |      |      |      |      |        |      |      |        |        |      |      |      |       |      |      |      |      |      |      |      |       |      |      |      |      |      |      |      |        |      |      |      |      |      |      |      |        |      |       |        |        |      |      |      |        |      |      |        |        |      |      |      |       |      |      |      |      |      |      |      |
| Lab 17    | N.D.                                                                                                                                                                                                           | N.D.                                                                                                                                                                                                                                                                                                                                                                                                                                                                                                                                                                                                                                                                                                                                                                                                                                                                                                                                                                                                                                                                                                                                                                                                                                                                                                                                                                                                                                                                                                                                                                                                                                                                                                                                                                                                                                                                                                                                                                                                                                                                                                                                                                                                                        | N.D.      | N.D.                               | N.D.     | N.D.               | N.D.      |          |                    |     |       |    |      |        |        |      |      |   |       |      |      |        |        |      |      |      |       |   |       |        |        |      |     |   |        |      |      |        |        |      |      |      |        |      |      |      |      |      |      |      |        |      |      |        |        |      |      |      |       |      |      |      |      |      |      |      |       |      |      |      |      |      |      |      |        |      |      |      |      |      |      |      |        |      |       |        |        |      |      |      |        |      |      |        |        |      |      |      |       |      |      |      |      |      |      |      |
| Lab 10    | N.D.                                                                                                                                                                                                           | N.D.                                                                                                                                                                                                                                                                                                                                                                                                                                                                                                                                                                                                                                                                                                                                                                                                                                                                                                                                                                                                                                                                                                                                                                                                                                                                                                                                                                                                                                                                                                                                                                                                                                                                                                                                                                                                                                                                                                                                                                                                                                                                                                                                                                                                                        | N.D.      | N.D.                               | N.D.     | N.D.               | N.D.      |          |                    |     |       |    |      |        |        |      |      |   |       |      |      |        |        |      |      |      |       |   |       |        |        |      |     |   |        |      |      |        |        |      |      |      |        |      |      |      |      |      |      |      |        |      |      |        |        |      |      |      |       |      |      |      |      |      |      |      |       |      |      |      |      |      |      |      |        |      |      |      |      |      |      |      |        |      |       |        |        |      |      |      |        |      |      |        |        |      |      |      |       |      |      |      |      |      |      |      |
| Lab 7     | N.D.                                                                                                                                                                                                           | N.D.                                                                                                                                                                                                                                                                                                                                                                                                                                                                                                                                                                                                                                                                                                                                                                                                                                                                                                                                                                                                                                                                                                                                                                                                                                                                                                                                                                                                                                                                                                                                                                                                                                                                                                                                                                                                                                                                                                                                                                                                                                                                                                                                                                                                                        | N.D.      | N.D.                               | N.D.     | N.D.               | N.D.      |          |                    |     |       |    |      |        |        |      |      |   |       |      |      |        |        |      |      |      |       |   |       |        |        |      |     |   |        |      |      |        |        |      |      |      |        |      |      |      |      |      |      |      |        |      |      |        |        |      |      |      |       |      |      |      |      |      |      |      |       |      |      |      |      |      |      |      |        |      |      |      |      |      |      |      |        |      |       |        |        |      |      |      |        |      |      |        |        |      |      |      |       |      |      |      |      |      |      |      |

| No.       | multiple comparison procedure plot                                                                                                                                                                              | RTI details                                                                                                                                                                                                                                                                                                                                                                                                                                                                                                                                                                                                                                                                                                                                                                                                                                                                                                                                                                                                                                                                                                                                                                                                                                                                                                                                                                                                                                                                                                                                                                                                                                                                                                                                                                                                                                                                                                                                                                                                                                                                                                                                                                                                                                                                                                                                                                                                                                                                                                                                                          |           |                                    |          |                    |           |          |                    |     |       |    |       |        |        |      |     |   |       |    |       |        |        |      |     |   |       |   |       |        |        |      |     |   |        |      |      |        |        |      |      |      |        |      |      |      |      |      |      |      |        |      |      |        |        |      |      |      |        |      |      |      |      |      |      |      |        |      |      |      |      |      |      |      |        |      |      |      |      |      |      |      |        |      |      |      |      |      |      |      |        |      |      |      |      |      |      |      |        |      |      |      |      |      |      |      |        |      |      |      |      |      |      |      |        |      |      |      |      |      |      |      |        |      |      |      |      |      |      |      |        |      |      |      |      |      |      |      |
|-----------|-----------------------------------------------------------------------------------------------------------------------------------------------------------------------------------------------------------------|----------------------------------------------------------------------------------------------------------------------------------------------------------------------------------------------------------------------------------------------------------------------------------------------------------------------------------------------------------------------------------------------------------------------------------------------------------------------------------------------------------------------------------------------------------------------------------------------------------------------------------------------------------------------------------------------------------------------------------------------------------------------------------------------------------------------------------------------------------------------------------------------------------------------------------------------------------------------------------------------------------------------------------------------------------------------------------------------------------------------------------------------------------------------------------------------------------------------------------------------------------------------------------------------------------------------------------------------------------------------------------------------------------------------------------------------------------------------------------------------------------------------------------------------------------------------------------------------------------------------------------------------------------------------------------------------------------------------------------------------------------------------------------------------------------------------------------------------------------------------------------------------------------------------------------------------------------------------------------------------------------------------------------------------------------------------------------------------------------------------------------------------------------------------------------------------------------------------------------------------------------------------------------------------------------------------------------------------------------------------------------------------------------------------------------------------------------------------------------------------------------------------------------------------------------------------|-----------|------------------------------------|----------|--------------------|-----------|----------|--------------------|-----|-------|----|-------|--------|--------|------|-----|---|-------|----|-------|--------|--------|------|-----|---|-------|---|-------|--------|--------|------|-----|---|--------|------|------|--------|--------|------|------|------|--------|------|------|------|------|------|------|------|--------|------|------|--------|--------|------|------|------|--------|------|------|------|------|------|------|------|--------|------|------|------|------|------|------|------|--------|------|------|------|------|------|------|------|--------|------|------|------|------|------|------|------|--------|------|------|------|------|------|------|------|--------|------|------|------|------|------|------|------|--------|------|------|------|------|------|------|------|--------|------|------|------|------|------|------|------|--------|------|------|------|------|------|------|------|--------|------|------|------|------|------|------|------|
| (30)      | <p style="text-align: center;"><b>Comparison of Exp. RTI values:<br/>3,6,9,12-tetraoxatetradecane-1,14-diol</b></p> <p style="text-align: center;">No groups have means significantly different from Lab 06</p> | <table border="1"> <thead> <tr> <th>Institute</th> <th>Level of identification confidence</th> <th>Exp. tR</th> <th>Exp. RTI</th> <th>Pred. RTI</th> <th>ESI mode</th> <th>Application domain</th> <th>MCP</th> </tr> </thead> <tbody> <tr><td>Lab 6</td><td>2a</td><td>3.63</td><td>177.18</td><td>441.46</td><td>+ESI</td><td>AD3</td><td>a</td></tr> <tr><td>Lab 5</td><td>2a</td><td>5.84</td><td>206.08</td><td>441.46</td><td>+ESI</td><td>AD3</td><td>a</td></tr> <tr><td>Lab 4</td><td>3</td><td>5.20</td><td>237.57</td><td>441.46</td><td>+ESI</td><td>AD3</td><td>a</td></tr> <tr><td>Lab 12</td><td>2a</td><td>2.13</td><td>185.77</td><td>441.46</td><td>+ESI</td><td>AD3</td><td>a</td></tr> <tr><td>Lab 13</td><td>N.D.</td><td>N.D.</td><td>N.D.</td><td>N.D.</td><td>N.D.</td><td>N.D.</td><td>N.D.</td></tr> <tr><td>Lab 15</td><td>3</td><td>2.18</td><td>173.10</td><td>441.46</td><td>+ESI</td><td>AD3</td><td>a</td></tr> <tr><td>Lab 07</td><td>N.D.</td><td>N.D.</td><td>N.D.</td><td>N.D.</td><td>N.D.</td><td>N.D.</td><td>N.D.</td></tr> <tr><td>Lab 09</td><td>N.D.</td><td>N.D.</td><td>N.D.</td><td>N.D.</td><td>N.D.</td><td>N.D.</td><td>N.D.</td></tr> <tr><td>Lab 10</td><td>N.D.</td><td>N.D.</td><td>N.D.</td><td>N.D.</td><td>N.D.</td><td>N.D.</td><td>N.D.</td></tr> <tr><td>Lab 17</td><td>N.D.</td><td>N.D.</td><td>N.D.</td><td>N.D.</td><td>N.D.</td><td>N.D.</td><td>N.D.</td></tr> <tr><td>Lab 18</td><td>N.D.</td><td>N.D.</td><td>N.D.</td><td>N.D.</td><td>N.D.</td><td>N.D.</td><td>N.D.</td></tr> <tr><td>Lab 02</td><td>N.D.</td><td>N.D.</td><td>N.D.</td><td>N.D.</td><td>N.D.</td><td>N.D.</td><td>N.D.</td></tr> <tr><td>Lab 09</td><td>N.D.</td><td>N.D.</td><td>N.D.</td><td>N.D.</td><td>N.D.</td><td>N.D.</td><td>N.D.</td></tr> <tr><td>Lab 13</td><td>N.D.</td><td>N.D.</td><td>N.D.</td><td>N.D.</td><td>N.D.</td><td>N.D.</td><td>N.D.</td></tr> </tbody> </table> <p>AD3: Pred./Exp. tR are not reliable (high SR; use other verification tools (box3))<br/>N.D.: Not detected.</p> <p>Note: This compound is outside of AD of models, but the exp. RTI is comparable. All institutes have acceptable exp. RTI values and the difference is <b>not significant at 99% CIs</b> of the calibration curve.<br/><b>Promote “Lab 15” &amp; “Lab 4” to level 2!</b></p>                                                                                                                                                                                                                                    | Institute | Level of identification confidence | Exp. tR  | Exp. RTI           | Pred. RTI | ESI mode | Application domain | MCP | Lab 6 | 2a | 3.63  | 177.18 | 441.46 | +ESI | AD3 | a | Lab 5 | 2a | 5.84  | 206.08 | 441.46 | +ESI | AD3 | a | Lab 4 | 3 | 5.20  | 237.57 | 441.46 | +ESI | AD3 | a | Lab 12 | 2a   | 2.13 | 185.77 | 441.46 | +ESI | AD3  | a    | Lab 13 | N.D. | N.D. | N.D. | N.D. | N.D. | N.D. | N.D. | Lab 15 | 3    | 2.18 | 173.10 | 441.46 | +ESI | AD3  | a    | Lab 07 | N.D. | N.D. | N.D. | N.D. | N.D. | N.D. | N.D. | Lab 09 | N.D. | N.D. | N.D. | N.D. | N.D. | N.D. | N.D. | Lab 10 | N.D. | N.D. | N.D. | N.D. | N.D. | N.D. | N.D. | Lab 17 | N.D. | N.D. | N.D. | N.D. | N.D. | N.D. | N.D. | Lab 18 | N.D. | N.D. | N.D. | N.D. | N.D. | N.D. | N.D. | Lab 02 | N.D. | N.D. | N.D. | N.D. | N.D. | N.D. | N.D. | Lab 09 | N.D. | N.D. | N.D. | N.D. | N.D. | N.D. | N.D. | Lab 13 | N.D. | N.D. | N.D. | N.D. | N.D. | N.D. | N.D. |        |      |      |      |      |      |      |      |        |      |      |      |      |      |      |      |
| Institute | Level of identification confidence                                                                                                                                                                              | Exp. tR                                                                                                                                                                                                                                                                                                                                                                                                                                                                                                                                                                                                                                                                                                                                                                                                                                                                                                                                                                                                                                                                                                                                                                                                                                                                                                                                                                                                                                                                                                                                                                                                                                                                                                                                                                                                                                                                                                                                                                                                                                                                                                                                                                                                                                                                                                                                                                                                                                                                                                                                                              | Exp. RTI  | Pred. RTI                          | ESI mode | Application domain | MCP       |          |                    |     |       |    |       |        |        |      |     |   |       |    |       |        |        |      |     |   |       |   |       |        |        |      |     |   |        |      |      |        |        |      |      |      |        |      |      |      |      |      |      |      |        |      |      |        |        |      |      |      |        |      |      |      |      |      |      |      |        |      |      |      |      |      |      |      |        |      |      |      |      |      |      |      |        |      |      |      |      |      |      |      |        |      |      |      |      |      |      |      |        |      |      |      |      |      |      |      |        |      |      |      |      |      |      |      |        |      |      |      |      |      |      |      |        |      |      |      |      |      |      |      |        |      |      |      |      |      |      |      |
| Lab 6     | 2a                                                                                                                                                                                                              | 3.63                                                                                                                                                                                                                                                                                                                                                                                                                                                                                                                                                                                                                                                                                                                                                                                                                                                                                                                                                                                                                                                                                                                                                                                                                                                                                                                                                                                                                                                                                                                                                                                                                                                                                                                                                                                                                                                                                                                                                                                                                                                                                                                                                                                                                                                                                                                                                                                                                                                                                                                                                                 | 177.18    | 441.46                             | +ESI     | AD3                | a         |          |                    |     |       |    |       |        |        |      |     |   |       |    |       |        |        |      |     |   |       |   |       |        |        |      |     |   |        |      |      |        |        |      |      |      |        |      |      |      |      |      |      |      |        |      |      |        |        |      |      |      |        |      |      |      |      |      |      |      |        |      |      |      |      |      |      |      |        |      |      |      |      |      |      |      |        |      |      |      |      |      |      |      |        |      |      |      |      |      |      |      |        |      |      |      |      |      |      |      |        |      |      |      |      |      |      |      |        |      |      |      |      |      |      |      |        |      |      |      |      |      |      |      |        |      |      |      |      |      |      |      |
| Lab 5     | 2a                                                                                                                                                                                                              | 5.84                                                                                                                                                                                                                                                                                                                                                                                                                                                                                                                                                                                                                                                                                                                                                                                                                                                                                                                                                                                                                                                                                                                                                                                                                                                                                                                                                                                                                                                                                                                                                                                                                                                                                                                                                                                                                                                                                                                                                                                                                                                                                                                                                                                                                                                                                                                                                                                                                                                                                                                                                                 | 206.08    | 441.46                             | +ESI     | AD3                | a         |          |                    |     |       |    |       |        |        |      |     |   |       |    |       |        |        |      |     |   |       |   |       |        |        |      |     |   |        |      |      |        |        |      |      |      |        |      |      |      |      |      |      |      |        |      |      |        |        |      |      |      |        |      |      |      |      |      |      |      |        |      |      |      |      |      |      |      |        |      |      |      |      |      |      |      |        |      |      |      |      |      |      |      |        |      |      |      |      |      |      |      |        |      |      |      |      |      |      |      |        |      |      |      |      |      |      |      |        |      |      |      |      |      |      |      |        |      |      |      |      |      |      |      |        |      |      |      |      |      |      |      |
| Lab 4     | 3                                                                                                                                                                                                               | 5.20                                                                                                                                                                                                                                                                                                                                                                                                                                                                                                                                                                                                                                                                                                                                                                                                                                                                                                                                                                                                                                                                                                                                                                                                                                                                                                                                                                                                                                                                                                                                                                                                                                                                                                                                                                                                                                                                                                                                                                                                                                                                                                                                                                                                                                                                                                                                                                                                                                                                                                                                                                 | 237.57    | 441.46                             | +ESI     | AD3                | a         |          |                    |     |       |    |       |        |        |      |     |   |       |    |       |        |        |      |     |   |       |   |       |        |        |      |     |   |        |      |      |        |        |      |      |      |        |      |      |      |      |      |      |      |        |      |      |        |        |      |      |      |        |      |      |      |      |      |      |      |        |      |      |      |      |      |      |      |        |      |      |      |      |      |      |      |        |      |      |      |      |      |      |      |        |      |      |      |      |      |      |      |        |      |      |      |      |      |      |      |        |      |      |      |      |      |      |      |        |      |      |      |      |      |      |      |        |      |      |      |      |      |      |      |        |      |      |      |      |      |      |      |
| Lab 12    | 2a                                                                                                                                                                                                              | 2.13                                                                                                                                                                                                                                                                                                                                                                                                                                                                                                                                                                                                                                                                                                                                                                                                                                                                                                                                                                                                                                                                                                                                                                                                                                                                                                                                                                                                                                                                                                                                                                                                                                                                                                                                                                                                                                                                                                                                                                                                                                                                                                                                                                                                                                                                                                                                                                                                                                                                                                                                                                 | 185.77    | 441.46                             | +ESI     | AD3                | a         |          |                    |     |       |    |       |        |        |      |     |   |       |    |       |        |        |      |     |   |       |   |       |        |        |      |     |   |        |      |      |        |        |      |      |      |        |      |      |      |      |      |      |      |        |      |      |        |        |      |      |      |        |      |      |      |      |      |      |      |        |      |      |      |      |      |      |      |        |      |      |      |      |      |      |      |        |      |      |      |      |      |      |      |        |      |      |      |      |      |      |      |        |      |      |      |      |      |      |      |        |      |      |      |      |      |      |      |        |      |      |      |      |      |      |      |        |      |      |      |      |      |      |      |        |      |      |      |      |      |      |      |
| Lab 13    | N.D.                                                                                                                                                                                                            | N.D.                                                                                                                                                                                                                                                                                                                                                                                                                                                                                                                                                                                                                                                                                                                                                                                                                                                                                                                                                                                                                                                                                                                                                                                                                                                                                                                                                                                                                                                                                                                                                                                                                                                                                                                                                                                                                                                                                                                                                                                                                                                                                                                                                                                                                                                                                                                                                                                                                                                                                                                                                                 | N.D.      | N.D.                               | N.D.     | N.D.               | N.D.      |          |                    |     |       |    |       |        |        |      |     |   |       |    |       |        |        |      |     |   |       |   |       |        |        |      |     |   |        |      |      |        |        |      |      |      |        |      |      |      |      |      |      |      |        |      |      |        |        |      |      |      |        |      |      |      |      |      |      |      |        |      |      |      |      |      |      |      |        |      |      |      |      |      |      |      |        |      |      |      |      |      |      |      |        |      |      |      |      |      |      |      |        |      |      |      |      |      |      |      |        |      |      |      |      |      |      |      |        |      |      |      |      |      |      |      |        |      |      |      |      |      |      |      |        |      |      |      |      |      |      |      |
| Lab 15    | 3                                                                                                                                                                                                               | 2.18                                                                                                                                                                                                                                                                                                                                                                                                                                                                                                                                                                                                                                                                                                                                                                                                                                                                                                                                                                                                                                                                                                                                                                                                                                                                                                                                                                                                                                                                                                                                                                                                                                                                                                                                                                                                                                                                                                                                                                                                                                                                                                                                                                                                                                                                                                                                                                                                                                                                                                                                                                 | 173.10    | 441.46                             | +ESI     | AD3                | a         |          |                    |     |       |    |       |        |        |      |     |   |       |    |       |        |        |      |     |   |       |   |       |        |        |      |     |   |        |      |      |        |        |      |      |      |        |      |      |      |      |      |      |      |        |      |      |        |        |      |      |      |        |      |      |      |      |      |      |      |        |      |      |      |      |      |      |      |        |      |      |      |      |      |      |      |        |      |      |      |      |      |      |      |        |      |      |      |      |      |      |      |        |      |      |      |      |      |      |      |        |      |      |      |      |      |      |      |        |      |      |      |      |      |      |      |        |      |      |      |      |      |      |      |        |      |      |      |      |      |      |      |
| Lab 07    | N.D.                                                                                                                                                                                                            | N.D.                                                                                                                                                                                                                                                                                                                                                                                                                                                                                                                                                                                                                                                                                                                                                                                                                                                                                                                                                                                                                                                                                                                                                                                                                                                                                                                                                                                                                                                                                                                                                                                                                                                                                                                                                                                                                                                                                                                                                                                                                                                                                                                                                                                                                                                                                                                                                                                                                                                                                                                                                                 | N.D.      | N.D.                               | N.D.     | N.D.               | N.D.      |          |                    |     |       |    |       |        |        |      |     |   |       |    |       |        |        |      |     |   |       |   |       |        |        |      |     |   |        |      |      |        |        |      |      |      |        |      |      |      |      |      |      |      |        |      |      |        |        |      |      |      |        |      |      |      |      |      |      |      |        |      |      |      |      |      |      |      |        |      |      |      |      |      |      |      |        |      |      |      |      |      |      |      |        |      |      |      |      |      |      |      |        |      |      |      |      |      |      |      |        |      |      |      |      |      |      |      |        |      |      |      |      |      |      |      |        |      |      |      |      |      |      |      |        |      |      |      |      |      |      |      |
| Lab 09    | N.D.                                                                                                                                                                                                            | N.D.                                                                                                                                                                                                                                                                                                                                                                                                                                                                                                                                                                                                                                                                                                                                                                                                                                                                                                                                                                                                                                                                                                                                                                                                                                                                                                                                                                                                                                                                                                                                                                                                                                                                                                                                                                                                                                                                                                                                                                                                                                                                                                                                                                                                                                                                                                                                                                                                                                                                                                                                                                 | N.D.      | N.D.                               | N.D.     | N.D.               | N.D.      |          |                    |     |       |    |       |        |        |      |     |   |       |    |       |        |        |      |     |   |       |   |       |        |        |      |     |   |        |      |      |        |        |      |      |      |        |      |      |      |      |      |      |      |        |      |      |        |        |      |      |      |        |      |      |      |      |      |      |      |        |      |      |      |      |      |      |      |        |      |      |      |      |      |      |      |        |      |      |      |      |      |      |      |        |      |      |      |      |      |      |      |        |      |      |      |      |      |      |      |        |      |      |      |      |      |      |      |        |      |      |      |      |      |      |      |        |      |      |      |      |      |      |      |        |      |      |      |      |      |      |      |
| Lab 10    | N.D.                                                                                                                                                                                                            | N.D.                                                                                                                                                                                                                                                                                                                                                                                                                                                                                                                                                                                                                                                                                                                                                                                                                                                                                                                                                                                                                                                                                                                                                                                                                                                                                                                                                                                                                                                                                                                                                                                                                                                                                                                                                                                                                                                                                                                                                                                                                                                                                                                                                                                                                                                                                                                                                                                                                                                                                                                                                                 | N.D.      | N.D.                               | N.D.     | N.D.               | N.D.      |          |                    |     |       |    |       |        |        |      |     |   |       |    |       |        |        |      |     |   |       |   |       |        |        |      |     |   |        |      |      |        |        |      |      |      |        |      |      |      |      |      |      |      |        |      |      |        |        |      |      |      |        |      |      |      |      |      |      |      |        |      |      |      |      |      |      |      |        |      |      |      |      |      |      |      |        |      |      |      |      |      |      |      |        |      |      |      |      |      |      |      |        |      |      |      |      |      |      |      |        |      |      |      |      |      |      |      |        |      |      |      |      |      |      |      |        |      |      |      |      |      |      |      |        |      |      |      |      |      |      |      |
| Lab 17    | N.D.                                                                                                                                                                                                            | N.D.                                                                                                                                                                                                                                                                                                                                                                                                                                                                                                                                                                                                                                                                                                                                                                                                                                                                                                                                                                                                                                                                                                                                                                                                                                                                                                                                                                                                                                                                                                                                                                                                                                                                                                                                                                                                                                                                                                                                                                                                                                                                                                                                                                                                                                                                                                                                                                                                                                                                                                                                                                 | N.D.      | N.D.                               | N.D.     | N.D.               | N.D.      |          |                    |     |       |    |       |        |        |      |     |   |       |    |       |        |        |      |     |   |       |   |       |        |        |      |     |   |        |      |      |        |        |      |      |      |        |      |      |      |      |      |      |      |        |      |      |        |        |      |      |      |        |      |      |      |      |      |      |      |        |      |      |      |      |      |      |      |        |      |      |      |      |      |      |      |        |      |      |      |      |      |      |      |        |      |      |      |      |      |      |      |        |      |      |      |      |      |      |      |        |      |      |      |      |      |      |      |        |      |      |      |      |      |      |      |        |      |      |      |      |      |      |      |        |      |      |      |      |      |      |      |
| Lab 18    | N.D.                                                                                                                                                                                                            | N.D.                                                                                                                                                                                                                                                                                                                                                                                                                                                                                                                                                                                                                                                                                                                                                                                                                                                                                                                                                                                                                                                                                                                                                                                                                                                                                                                                                                                                                                                                                                                                                                                                                                                                                                                                                                                                                                                                                                                                                                                                                                                                                                                                                                                                                                                                                                                                                                                                                                                                                                                                                                 | N.D.      | N.D.                               | N.D.     | N.D.               | N.D.      |          |                    |     |       |    |       |        |        |      |     |   |       |    |       |        |        |      |     |   |       |   |       |        |        |      |     |   |        |      |      |        |        |      |      |      |        |      |      |      |      |      |      |      |        |      |      |        |        |      |      |      |        |      |      |      |      |      |      |      |        |      |      |      |      |      |      |      |        |      |      |      |      |      |      |      |        |      |      |      |      |      |      |      |        |      |      |      |      |      |      |      |        |      |      |      |      |      |      |      |        |      |      |      |      |      |      |      |        |      |      |      |      |      |      |      |        |      |      |      |      |      |      |      |        |      |      |      |      |      |      |      |
| Lab 02    | N.D.                                                                                                                                                                                                            | N.D.                                                                                                                                                                                                                                                                                                                                                                                                                                                                                                                                                                                                                                                                                                                                                                                                                                                                                                                                                                                                                                                                                                                                                                                                                                                                                                                                                                                                                                                                                                                                                                                                                                                                                                                                                                                                                                                                                                                                                                                                                                                                                                                                                                                                                                                                                                                                                                                                                                                                                                                                                                 | N.D.      | N.D.                               | N.D.     | N.D.               | N.D.      |          |                    |     |       |    |       |        |        |      |     |   |       |    |       |        |        |      |     |   |       |   |       |        |        |      |     |   |        |      |      |        |        |      |      |      |        |      |      |      |      |      |      |      |        |      |      |        |        |      |      |      |        |      |      |      |      |      |      |      |        |      |      |      |      |      |      |      |        |      |      |      |      |      |      |      |        |      |      |      |      |      |      |      |        |      |      |      |      |      |      |      |        |      |      |      |      |      |      |      |        |      |      |      |      |      |      |      |        |      |      |      |      |      |      |      |        |      |      |      |      |      |      |      |        |      |      |      |      |      |      |      |
| Lab 09    | N.D.                                                                                                                                                                                                            | N.D.                                                                                                                                                                                                                                                                                                                                                                                                                                                                                                                                                                                                                                                                                                                                                                                                                                                                                                                                                                                                                                                                                                                                                                                                                                                                                                                                                                                                                                                                                                                                                                                                                                                                                                                                                                                                                                                                                                                                                                                                                                                                                                                                                                                                                                                                                                                                                                                                                                                                                                                                                                 | N.D.      | N.D.                               | N.D.     | N.D.               | N.D.      |          |                    |     |       |    |       |        |        |      |     |   |       |    |       |        |        |      |     |   |       |   |       |        |        |      |     |   |        |      |      |        |        |      |      |      |        |      |      |      |      |      |      |      |        |      |      |        |        |      |      |      |        |      |      |      |      |      |      |      |        |      |      |      |      |      |      |      |        |      |      |      |      |      |      |      |        |      |      |      |      |      |      |      |        |      |      |      |      |      |      |      |        |      |      |      |      |      |      |      |        |      |      |      |      |      |      |      |        |      |      |      |      |      |      |      |        |      |      |      |      |      |      |      |        |      |      |      |      |      |      |      |
| Lab 13    | N.D.                                                                                                                                                                                                            | N.D.                                                                                                                                                                                                                                                                                                                                                                                                                                                                                                                                                                                                                                                                                                                                                                                                                                                                                                                                                                                                                                                                                                                                                                                                                                                                                                                                                                                                                                                                                                                                                                                                                                                                                                                                                                                                                                                                                                                                                                                                                                                                                                                                                                                                                                                                                                                                                                                                                                                                                                                                                                 | N.D.      | N.D.                               | N.D.     | N.D.               | N.D.      |          |                    |     |       |    |       |        |        |      |     |   |       |    |       |        |        |      |     |   |       |   |       |        |        |      |     |   |        |      |      |        |        |      |      |      |        |      |      |      |      |      |      |      |        |      |      |        |        |      |      |      |        |      |      |      |      |      |      |      |        |      |      |      |      |      |      |      |        |      |      |      |      |      |      |      |        |      |      |      |      |      |      |      |        |      |      |      |      |      |      |      |        |      |      |      |      |      |      |      |        |      |      |      |      |      |      |      |        |      |      |      |      |      |      |      |        |      |      |      |      |      |      |      |        |      |      |      |      |      |      |      |
| (31)      | <p style="text-align: center;"><b>Comparison of Exp. RTI values:<br/>3,6,9,12-Tetraoxatetracosan-1-ol</b></p> <p style="text-align: center;">No groups have means significantly different from Lab 06</p>       | <table border="1"> <thead> <tr> <th>Institute</th> <th>Level of identification confidence</th> <th>Exp. tR</th> <th>Exp. RTI</th> <th>Pred. RTI</th> <th>ESI mode</th> <th>Application domain</th> <th>MCP</th> </tr> </thead> <tbody> <tr><td>Lab 6</td><td>1</td><td>13.83</td><td>956.20</td><td>806.31</td><td>+ESI</td><td>AD2</td><td>a</td></tr> <tr><td>Lab 5</td><td>3</td><td>17.57</td><td>785.69</td><td>806.31</td><td>+ESI</td><td>AD1</td><td>a</td></tr> <tr><td>Lab 4</td><td>3</td><td>16.05</td><td>913.48</td><td>806.31</td><td>+ESI</td><td>AD2</td><td>a</td></tr> <tr><td>Lab 12</td><td>N.D.</td><td>N.D.</td><td>N.D.</td><td>N.D.</td><td>N.D.</td><td>N.D.</td><td>N.D.</td></tr> <tr><td>Lab 13</td><td>N.D.</td><td>N.D.</td><td>N.D.</td><td>N.D.</td><td>N.D.</td><td>N.D.</td><td>N.D.</td></tr> <tr><td>Lab 15</td><td>N.D.</td><td>N.D.</td><td>N.D.</td><td>N.D.</td><td>N.D.</td><td>N.D.</td><td>N.D.</td></tr> <tr><td>Lab 09</td><td>N.D.</td><td>N.D.</td><td>N.D.</td><td>N.D.</td><td>N.D.</td><td>N.D.</td><td>N.D.</td></tr> <tr><td>Lab 07</td><td>N.D.</td><td>N.D.</td><td>N.D.</td><td>N.D.</td><td>N.D.</td><td>N.D.</td><td>N.D.</td></tr> <tr><td>Lab 10</td><td>N.D.</td><td>N.D.</td><td>N.D.</td><td>N.D.</td><td>N.D.</td><td>N.D.</td><td>N.D.</td></tr> <tr><td>Lab 18</td><td>N.D.</td><td>N.D.</td><td>N.D.</td><td>N.D.</td><td>N.D.</td><td>N.D.</td><td>N.D.</td></tr> <tr><td>Lab 02</td><td>N.D.</td><td>N.D.</td><td>N.D.</td><td>N.D.</td><td>N.D.</td><td>N.D.</td><td>N.D.</td></tr> <tr><td>Lab 17</td><td>N.D.</td><td>N.D.</td><td>N.D.</td><td>N.D.</td><td>N.D.</td><td>N.D.</td><td>N.D.</td></tr> <tr><td>Lab 10</td><td>N.D.</td><td>N.D.</td><td>N.D.</td><td>N.D.</td><td>N.D.</td><td>N.D.</td><td>N.D.</td></tr> <tr><td>Lab 09</td><td>N.D.</td><td>N.D.</td><td>N.D.</td><td>N.D.</td><td>N.D.</td><td>N.D.</td><td>N.D.</td></tr> <tr><td>Lab 13</td><td>N.D.</td><td>N.D.</td><td>N.D.</td><td>N.D.</td><td>N.D.</td><td>N.D.</td><td>N.D.</td></tr> <tr><td>Lab 12</td><td>N.D.</td><td>N.D.</td><td>N.D.</td><td>N.D.</td><td>N.D.</td><td>N.D.</td><td>N.D.</td></tr> </tbody> </table> <p>AD1: Exp. &amp; Pred. tR are accepted for this candidate (box1)<br/>AD2: Although there is error, exp. &amp; pred. tR are accepted for this candidate (box2)<br/>N.D.: Not detected.</p> <p>All institutes have acceptable exp. RTI values and the difference is <b>not significant at 99% CIs</b> of the calibration curve. <b>Promote “Lab 5” &amp; “Lab 4” to level 2!</b></p> | Institute | Level of identification confidence | Exp. tR  | Exp. RTI           | Pred. RTI | ESI mode | Application domain | MCP | Lab 6 | 1  | 13.83 | 956.20 | 806.31 | +ESI | AD2 | a | Lab 5 | 3  | 17.57 | 785.69 | 806.31 | +ESI | AD1 | a | Lab 4 | 3 | 16.05 | 913.48 | 806.31 | +ESI | AD2 | a | Lab 12 | N.D. | N.D. | N.D.   | N.D.   | N.D. | N.D. | N.D. | Lab 13 | N.D. | N.D. | N.D. | N.D. | N.D. | N.D. | N.D. | Lab 15 | N.D. | N.D. | N.D.   | N.D.   | N.D. | N.D. | N.D. | Lab 09 | N.D. | N.D. | N.D. | N.D. | N.D. | N.D. | N.D. | Lab 07 | N.D. | N.D. | N.D. | N.D. | N.D. | N.D. | N.D. | Lab 10 | N.D. | N.D. | N.D. | N.D. | N.D. | N.D. | N.D. | Lab 18 | N.D. | N.D. | N.D. | N.D. | N.D. | N.D. | N.D. | Lab 02 | N.D. | N.D. | N.D. | N.D. | N.D. | N.D. | N.D. | Lab 17 | N.D. | N.D. | N.D. | N.D. | N.D. | N.D. | N.D. | Lab 10 | N.D. | N.D. | N.D. | N.D. | N.D. | N.D. | N.D. | Lab 09 | N.D. | N.D. | N.D. | N.D. | N.D. | N.D. | N.D. | Lab 13 | N.D. | N.D. | N.D. | N.D. | N.D. | N.D. | N.D. | Lab 12 | N.D. | N.D. | N.D. | N.D. | N.D. | N.D. | N.D. |
| Institute | Level of identification confidence                                                                                                                                                                              | Exp. tR                                                                                                                                                                                                                                                                                                                                                                                                                                                                                                                                                                                                                                                                                                                                                                                                                                                                                                                                                                                                                                                                                                                                                                                                                                                                                                                                                                                                                                                                                                                                                                                                                                                                                                                                                                                                                                                                                                                                                                                                                                                                                                                                                                                                                                                                                                                                                                                                                                                                                                                                                              | Exp. RTI  | Pred. RTI                          | ESI mode | Application domain | MCP       |          |                    |     |       |    |       |        |        |      |     |   |       |    |       |        |        |      |     |   |       |   |       |        |        |      |     |   |        |      |      |        |        |      |      |      |        |      |      |      |      |      |      |      |        |      |      |        |        |      |      |      |        |      |      |      |      |      |      |      |        |      |      |      |      |      |      |      |        |      |      |      |      |      |      |      |        |      |      |      |      |      |      |      |        |      |      |      |      |      |      |      |        |      |      |      |      |      |      |      |        |      |      |      |      |      |      |      |        |      |      |      |      |      |      |      |        |      |      |      |      |      |      |      |        |      |      |      |      |      |      |      |
| Lab 6     | 1                                                                                                                                                                                                               | 13.83                                                                                                                                                                                                                                                                                                                                                                                                                                                                                                                                                                                                                                                                                                                                                                                                                                                                                                                                                                                                                                                                                                                                                                                                                                                                                                                                                                                                                                                                                                                                                                                                                                                                                                                                                                                                                                                                                                                                                                                                                                                                                                                                                                                                                                                                                                                                                                                                                                                                                                                                                                | 956.20    | 806.31                             | +ESI     | AD2                | a         |          |                    |     |       |    |       |        |        |      |     |   |       |    |       |        |        |      |     |   |       |   |       |        |        |      |     |   |        |      |      |        |        |      |      |      |        |      |      |      |      |      |      |      |        |      |      |        |        |      |      |      |        |      |      |      |      |      |      |      |        |      |      |      |      |      |      |      |        |      |      |      |      |      |      |      |        |      |      |      |      |      |      |      |        |      |      |      |      |      |      |      |        |      |      |      |      |      |      |      |        |      |      |      |      |      |      |      |        |      |      |      |      |      |      |      |        |      |      |      |      |      |      |      |        |      |      |      |      |      |      |      |
| Lab 5     | 3                                                                                                                                                                                                               | 17.57                                                                                                                                                                                                                                                                                                                                                                                                                                                                                                                                                                                                                                                                                                                                                                                                                                                                                                                                                                                                                                                                                                                                                                                                                                                                                                                                                                                                                                                                                                                                                                                                                                                                                                                                                                                                                                                                                                                                                                                                                                                                                                                                                                                                                                                                                                                                                                                                                                                                                                                                                                | 785.69    | 806.31                             | +ESI     | AD1                | a         |          |                    |     |       |    |       |        |        |      |     |   |       |    |       |        |        |      |     |   |       |   |       |        |        |      |     |   |        |      |      |        |        |      |      |      |        |      |      |      |      |      |      |      |        |      |      |        |        |      |      |      |        |      |      |      |      |      |      |      |        |      |      |      |      |      |      |      |        |      |      |      |      |      |      |      |        |      |      |      |      |      |      |      |        |      |      |      |      |      |      |      |        |      |      |      |      |      |      |      |        |      |      |      |      |      |      |      |        |      |      |      |      |      |      |      |        |      |      |      |      |      |      |      |        |      |      |      |      |      |      |      |
| Lab 4     | 3                                                                                                                                                                                                               | 16.05                                                                                                                                                                                                                                                                                                                                                                                                                                                                                                                                                                                                                                                                                                                                                                                                                                                                                                                                                                                                                                                                                                                                                                                                                                                                                                                                                                                                                                                                                                                                                                                                                                                                                                                                                                                                                                                                                                                                                                                                                                                                                                                                                                                                                                                                                                                                                                                                                                                                                                                                                                | 913.48    | 806.31                             | +ESI     | AD2                | a         |          |                    |     |       |    |       |        |        |      |     |   |       |    |       |        |        |      |     |   |       |   |       |        |        |      |     |   |        |      |      |        |        |      |      |      |        |      |      |      |      |      |      |      |        |      |      |        |        |      |      |      |        |      |      |      |      |      |      |      |        |      |      |      |      |      |      |      |        |      |      |      |      |      |      |      |        |      |      |      |      |      |      |      |        |      |      |      |      |      |      |      |        |      |      |      |      |      |      |      |        |      |      |      |      |      |      |      |        |      |      |      |      |      |      |      |        |      |      |      |      |      |      |      |        |      |      |      |      |      |      |      |
| Lab 12    | N.D.                                                                                                                                                                                                            | N.D.                                                                                                                                                                                                                                                                                                                                                                                                                                                                                                                                                                                                                                                                                                                                                                                                                                                                                                                                                                                                                                                                                                                                                                                                                                                                                                                                                                                                                                                                                                                                                                                                                                                                                                                                                                                                                                                                                                                                                                                                                                                                                                                                                                                                                                                                                                                                                                                                                                                                                                                                                                 | N.D.      | N.D.                               | N.D.     | N.D.               | N.D.      |          |                    |     |       |    |       |        |        |      |     |   |       |    |       |        |        |      |     |   |       |   |       |        |        |      |     |   |        |      |      |        |        |      |      |      |        |      |      |      |      |      |      |      |        |      |      |        |        |      |      |      |        |      |      |      |      |      |      |      |        |      |      |      |      |      |      |      |        |      |      |      |      |      |      |      |        |      |      |      |      |      |      |      |        |      |      |      |      |      |      |      |        |      |      |      |      |      |      |      |        |      |      |      |      |      |      |      |        |      |      |      |      |      |      |      |        |      |      |      |      |      |      |      |        |      |      |      |      |      |      |      |
| Lab 13    | N.D.                                                                                                                                                                                                            | N.D.                                                                                                                                                                                                                                                                                                                                                                                                                                                                                                                                                                                                                                                                                                                                                                                                                                                                                                                                                                                                                                                                                                                                                                                                                                                                                                                                                                                                                                                                                                                                                                                                                                                                                                                                                                                                                                                                                                                                                                                                                                                                                                                                                                                                                                                                                                                                                                                                                                                                                                                                                                 | N.D.      | N.D.                               | N.D.     | N.D.               | N.D.      |          |                    |     |       |    |       |        |        |      |     |   |       |    |       |        |        |      |     |   |       |   |       |        |        |      |     |   |        |      |      |        |        |      |      |      |        |      |      |      |      |      |      |      |        |      |      |        |        |      |      |      |        |      |      |      |      |      |      |      |        |      |      |      |      |      |      |      |        |      |      |      |      |      |      |      |        |      |      |      |      |      |      |      |        |      |      |      |      |      |      |      |        |      |      |      |      |      |      |      |        |      |      |      |      |      |      |      |        |      |      |      |      |      |      |      |        |      |      |      |      |      |      |      |        |      |      |      |      |      |      |      |
| Lab 15    | N.D.                                                                                                                                                                                                            | N.D.                                                                                                                                                                                                                                                                                                                                                                                                                                                                                                                                                                                                                                                                                                                                                                                                                                                                                                                                                                                                                                                                                                                                                                                                                                                                                                                                                                                                                                                                                                                                                                                                                                                                                                                                                                                                                                                                                                                                                                                                                                                                                                                                                                                                                                                                                                                                                                                                                                                                                                                                                                 | N.D.      | N.D.                               | N.D.     | N.D.               | N.D.      |          |                    |     |       |    |       |        |        |      |     |   |       |    |       |        |        |      |     |   |       |   |       |        |        |      |     |   |        |      |      |        |        |      |      |      |        |      |      |      |      |      |      |      |        |      |      |        |        |      |      |      |        |      |      |      |      |      |      |      |        |      |      |      |      |      |      |      |        |      |      |      |      |      |      |      |        |      |      |      |      |      |      |      |        |      |      |      |      |      |      |      |        |      |      |      |      |      |      |      |        |      |      |      |      |      |      |      |        |      |      |      |      |      |      |      |        |      |      |      |      |      |      |      |        |      |      |      |      |      |      |      |
| Lab 09    | N.D.                                                                                                                                                                                                            | N.D.                                                                                                                                                                                                                                                                                                                                                                                                                                                                                                                                                                                                                                                                                                                                                                                                                                                                                                                                                                                                                                                                                                                                                                                                                                                                                                                                                                                                                                                                                                                                                                                                                                                                                                                                                                                                                                                                                                                                                                                                                                                                                                                                                                                                                                                                                                                                                                                                                                                                                                                                                                 | N.D.      | N.D.                               | N.D.     | N.D.               | N.D.      |          |                    |     |       |    |       |        |        |      |     |   |       |    |       |        |        |      |     |   |       |   |       |        |        |      |     |   |        |      |      |        |        |      |      |      |        |      |      |      |      |      |      |      |        |      |      |        |        |      |      |      |        |      |      |      |      |      |      |      |        |      |      |      |      |      |      |      |        |      |      |      |      |      |      |      |        |      |      |      |      |      |      |      |        |      |      |      |      |      |      |      |        |      |      |      |      |      |      |      |        |      |      |      |      |      |      |      |        |      |      |      |      |      |      |      |        |      |      |      |      |      |      |      |        |      |      |      |      |      |      |      |
| Lab 07    | N.D.                                                                                                                                                                                                            | N.D.                                                                                                                                                                                                                                                                                                                                                                                                                                                                                                                                                                                                                                                                                                                                                                                                                                                                                                                                                                                                                                                                                                                                                                                                                                                                                                                                                                                                                                                                                                                                                                                                                                                                                                                                                                                                                                                                                                                                                                                                                                                                                                                                                                                                                                                                                                                                                                                                                                                                                                                                                                 | N.D.      | N.D.                               | N.D.     | N.D.               | N.D.      |          |                    |     |       |    |       |        |        |      |     |   |       |    |       |        |        |      |     |   |       |   |       |        |        |      |     |   |        |      |      |        |        |      |      |      |        |      |      |      |      |      |      |      |        |      |      |        |        |      |      |      |        |      |      |      |      |      |      |      |        |      |      |      |      |      |      |      |        |      |      |      |      |      |      |      |        |      |      |      |      |      |      |      |        |      |      |      |      |      |      |      |        |      |      |      |      |      |      |      |        |      |      |      |      |      |      |      |        |      |      |      |      |      |      |      |        |      |      |      |      |      |      |      |        |      |      |      |      |      |      |      |
| Lab 10    | N.D.                                                                                                                                                                                                            | N.D.                                                                                                                                                                                                                                                                                                                                                                                                                                                                                                                                                                                                                                                                                                                                                                                                                                                                                                                                                                                                                                                                                                                                                                                                                                                                                                                                                                                                                                                                                                                                                                                                                                                                                                                                                                                                                                                                                                                                                                                                                                                                                                                                                                                                                                                                                                                                                                                                                                                                                                                                                                 | N.D.      | N.D.                               | N.D.     | N.D.               | N.D.      |          |                    |     |       |    |       |        |        |      |     |   |       |    |       |        |        |      |     |   |       |   |       |        |        |      |     |   |        |      |      |        |        |      |      |      |        |      |      |      |      |      |      |      |        |      |      |        |        |      |      |      |        |      |      |      |      |      |      |      |        |      |      |      |      |      |      |      |        |      |      |      |      |      |      |      |        |      |      |      |      |      |      |      |        |      |      |      |      |      |      |      |        |      |      |      |      |      |      |      |        |      |      |      |      |      |      |      |        |      |      |      |      |      |      |      |        |      |      |      |      |      |      |      |        |      |      |      |      |      |      |      |
| Lab 18    | N.D.                                                                                                                                                                                                            | N.D.                                                                                                                                                                                                                                                                                                                                                                                                                                                                                                                                                                                                                                                                                                                                                                                                                                                                                                                                                                                                                                                                                                                                                                                                                                                                                                                                                                                                                                                                                                                                                                                                                                                                                                                                                                                                                                                                                                                                                                                                                                                                                                                                                                                                                                                                                                                                                                                                                                                                                                                                                                 | N.D.      | N.D.                               | N.D.     | N.D.               | N.D.      |          |                    |     |       |    |       |        |        |      |     |   |       |    |       |        |        |      |     |   |       |   |       |        |        |      |     |   |        |      |      |        |        |      |      |      |        |      |      |      |      |      |      |      |        |      |      |        |        |      |      |      |        |      |      |      |      |      |      |      |        |      |      |      |      |      |      |      |        |      |      |      |      |      |      |      |        |      |      |      |      |      |      |      |        |      |      |      |      |      |      |      |        |      |      |      |      |      |      |      |        |      |      |      |      |      |      |      |        |      |      |      |      |      |      |      |        |      |      |      |      |      |      |      |        |      |      |      |      |      |      |      |
| Lab 02    | N.D.                                                                                                                                                                                                            | N.D.                                                                                                                                                                                                                                                                                                                                                                                                                                                                                                                                                                                                                                                                                                                                                                                                                                                                                                                                                                                                                                                                                                                                                                                                                                                                                                                                                                                                                                                                                                                                                                                                                                                                                                                                                                                                                                                                                                                                                                                                                                                                                                                                                                                                                                                                                                                                                                                                                                                                                                                                                                 | N.D.      | N.D.                               | N.D.     | N.D.               | N.D.      |          |                    |     |       |    |       |        |        |      |     |   |       |    |       |        |        |      |     |   |       |   |       |        |        |      |     |   |        |      |      |        |        |      |      |      |        |      |      |      |      |      |      |      |        |      |      |        |        |      |      |      |        |      |      |      |      |      |      |      |        |      |      |      |      |      |      |      |        |      |      |      |      |      |      |      |        |      |      |      |      |      |      |      |        |      |      |      |      |      |      |      |        |      |      |      |      |      |      |      |        |      |      |      |      |      |      |      |        |      |      |      |      |      |      |      |        |      |      |      |      |      |      |      |        |      |      |      |      |      |      |      |
| Lab 17    | N.D.                                                                                                                                                                                                            | N.D.                                                                                                                                                                                                                                                                                                                                                                                                                                                                                                                                                                                                                                                                                                                                                                                                                                                                                                                                                                                                                                                                                                                                                                                                                                                                                                                                                                                                                                                                                                                                                                                                                                                                                                                                                                                                                                                                                                                                                                                                                                                                                                                                                                                                                                                                                                                                                                                                                                                                                                                                                                 | N.D.      | N.D.                               | N.D.     | N.D.               | N.D.      |          |                    |     |       |    |       |        |        |      |     |   |       |    |       |        |        |      |     |   |       |   |       |        |        |      |     |   |        |      |      |        |        |      |      |      |        |      |      |      |      |      |      |      |        |      |      |        |        |      |      |      |        |      |      |      |      |      |      |      |        |      |      |      |      |      |      |      |        |      |      |      |      |      |      |      |        |      |      |      |      |      |      |      |        |      |      |      |      |      |      |      |        |      |      |      |      |      |      |      |        |      |      |      |      |      |      |      |        |      |      |      |      |      |      |      |        |      |      |      |      |      |      |      |        |      |      |      |      |      |      |      |
| Lab 10    | N.D.                                                                                                                                                                                                            | N.D.                                                                                                                                                                                                                                                                                                                                                                                                                                                                                                                                                                                                                                                                                                                                                                                                                                                                                                                                                                                                                                                                                                                                                                                                                                                                                                                                                                                                                                                                                                                                                                                                                                                                                                                                                                                                                                                                                                                                                                                                                                                                                                                                                                                                                                                                                                                                                                                                                                                                                                                                                                 | N.D.      | N.D.                               | N.D.     | N.D.               | N.D.      |          |                    |     |       |    |       |        |        |      |     |   |       |    |       |        |        |      |     |   |       |   |       |        |        |      |     |   |        |      |      |        |        |      |      |      |        |      |      |      |      |      |      |      |        |      |      |        |        |      |      |      |        |      |      |      |      |      |      |      |        |      |      |      |      |      |      |      |        |      |      |      |      |      |      |      |        |      |      |      |      |      |      |      |        |      |      |      |      |      |      |      |        |      |      |      |      |      |      |      |        |      |      |      |      |      |      |      |        |      |      |      |      |      |      |      |        |      |      |      |      |      |      |      |        |      |      |      |      |      |      |      |
| Lab 09    | N.D.                                                                                                                                                                                                            | N.D.                                                                                                                                                                                                                                                                                                                                                                                                                                                                                                                                                                                                                                                                                                                                                                                                                                                                                                                                                                                                                                                                                                                                                                                                                                                                                                                                                                                                                                                                                                                                                                                                                                                                                                                                                                                                                                                                                                                                                                                                                                                                                                                                                                                                                                                                                                                                                                                                                                                                                                                                                                 | N.D.      | N.D.                               | N.D.     | N.D.               | N.D.      |          |                    |     |       |    |       |        |        |      |     |   |       |    |       |        |        |      |     |   |       |   |       |        |        |      |     |   |        |      |      |        |        |      |      |      |        |      |      |      |      |      |      |      |        |      |      |        |        |      |      |      |        |      |      |      |      |      |      |      |        |      |      |      |      |      |      |      |        |      |      |      |      |      |      |      |        |      |      |      |      |      |      |      |        |      |      |      |      |      |      |      |        |      |      |      |      |      |      |      |        |      |      |      |      |      |      |      |        |      |      |      |      |      |      |      |        |      |      |      |      |      |      |      |        |      |      |      |      |      |      |      |
| Lab 13    | N.D.                                                                                                                                                                                                            | N.D.                                                                                                                                                                                                                                                                                                                                                                                                                                                                                                                                                                                                                                                                                                                                                                                                                                                                                                                                                                                                                                                                                                                                                                                                                                                                                                                                                                                                                                                                                                                                                                                                                                                                                                                                                                                                                                                                                                                                                                                                                                                                                                                                                                                                                                                                                                                                                                                                                                                                                                                                                                 | N.D.      | N.D.                               | N.D.     | N.D.               | N.D.      |          |                    |     |       |    |       |        |        |      |     |   |       |    |       |        |        |      |     |   |       |   |       |        |        |      |     |   |        |      |      |        |        |      |      |      |        |      |      |      |      |      |      |      |        |      |      |        |        |      |      |      |        |      |      |      |      |      |      |      |        |      |      |      |      |      |      |      |        |      |      |      |      |      |      |      |        |      |      |      |      |      |      |      |        |      |      |      |      |      |      |      |        |      |      |      |      |      |      |      |        |      |      |      |      |      |      |      |        |      |      |      |      |      |      |      |        |      |      |      |      |      |      |      |        |      |      |      |      |      |      |      |
| Lab 12    | N.D.                                                                                                                                                                                                            | N.D.                                                                                                                                                                                                                                                                                                                                                                                                                                                                                                                                                                                                                                                                                                                                                                                                                                                                                                                                                                                                                                                                                                                                                                                                                                                                                                                                                                                                                                                                                                                                                                                                                                                                                                                                                                                                                                                                                                                                                                                                                                                                                                                                                                                                                                                                                                                                                                                                                                                                                                                                                                 | N.D.      | N.D.                               | N.D.     | N.D.               | N.D.      |          |                    |     |       |    |       |        |        |      |     |   |       |    |       |        |        |      |     |   |       |   |       |        |        |      |     |   |        |      |      |        |        |      |      |      |        |      |      |      |      |      |      |      |        |      |      |        |        |      |      |      |        |      |      |      |      |      |      |      |        |      |      |      |      |      |      |      |        |      |      |      |      |      |      |      |        |      |      |      |      |      |      |      |        |      |      |      |      |      |      |      |        |      |      |      |      |      |      |      |        |      |      |      |      |      |      |      |        |      |      |      |      |      |      |      |        |      |      |      |      |      |      |      |        |      |      |      |      |      |      |      |

| No.    | multiple comparison procedure plot                                                                                                                                                    | RTI details                                                                                                                                                                                                                                                                                                                                                                                                                                                                                                                                                                                                                                                                                                                                                                                                                                                                                                                                                                                                                                                                                                                                                                                                                                                                                                                                                                                                                                                                                                                                                                                                                                                                                                                                                                                                                                                                                                                                                                                                                                                                                                                             |           |                                    |           |          |                    |          |                    |     |       |      |      |      |      |      |      |      |       |      |      |      |      |      |      |      |       |   |       |        |        |      |     |   |        |      |      |        |        |      |      |      |        |      |       |        |        |      |      |      |        |      |      |      |      |      |      |      |       |      |      |      |      |      |      |      |       |      |      |      |      |      |      |      |        |      |      |      |      |      |      |      |        |      |       |        |        |      |      |      |        |      |      |      |      |      |      |      |       |      |      |      |      |      |      |      |
|--------|---------------------------------------------------------------------------------------------------------------------------------------------------------------------------------------|-----------------------------------------------------------------------------------------------------------------------------------------------------------------------------------------------------------------------------------------------------------------------------------------------------------------------------------------------------------------------------------------------------------------------------------------------------------------------------------------------------------------------------------------------------------------------------------------------------------------------------------------------------------------------------------------------------------------------------------------------------------------------------------------------------------------------------------------------------------------------------------------------------------------------------------------------------------------------------------------------------------------------------------------------------------------------------------------------------------------------------------------------------------------------------------------------------------------------------------------------------------------------------------------------------------------------------------------------------------------------------------------------------------------------------------------------------------------------------------------------------------------------------------------------------------------------------------------------------------------------------------------------------------------------------------------------------------------------------------------------------------------------------------------------------------------------------------------------------------------------------------------------------------------------------------------------------------------------------------------------------------------------------------------------------------------------------------------------------------------------------------------|-----------|------------------------------------|-----------|----------|--------------------|----------|--------------------|-----|-------|------|------|------|------|------|------|------|-------|------|------|------|------|------|------|------|-------|---|-------|--------|--------|------|-----|---|--------|------|------|--------|--------|------|------|------|--------|------|-------|--------|--------|------|------|------|--------|------|------|------|------|------|------|------|-------|------|------|------|------|------|------|------|-------|------|------|------|------|------|------|------|--------|------|------|------|------|------|------|------|--------|------|-------|--------|--------|------|------|------|--------|------|------|------|------|------|------|------|-------|------|------|------|------|------|------|------|
| (32)   | <p style="text-align: center;"><b>Comparison of Exp. RTI values: Miconazole</b></p> <p style="text-align: center;">No groups have means significantly different from Lab 04</p>       | <table border="1" style="width: 100%; border-collapse: collapse;"> <thead> <tr> <th>Institute</th> <th>Level of identification confidence</th> <th>Exp. tR</th> <th>Exp. RTI</th> <th>Pred. RTI</th> <th>ESI mode</th> <th>Application domain</th> <th>MCP</th> </tr> </thead> <tbody> <tr><td>Lab 6</td><td>N.D.</td><td>N.D.</td><td>N.D.</td><td>N.D.</td><td>N.D.</td><td>N.D.</td><td>N.D.</td></tr> <tr><td>Lab 5</td><td>N.D.</td><td>N.D.</td><td>N.D.</td><td>N.D.</td><td>N.D.</td><td>N.D.</td><td>N.D.</td></tr> <tr><td>Lab 4</td><td>2</td><td>11.22</td><td>612.66</td><td>841.19</td><td>+ESI</td><td>AD3</td><td>a</td></tr> <tr><td>Lab 12</td><td>2a</td><td>7.11</td><td>732.56</td><td>841.19</td><td>+ESI</td><td>AD2</td><td>a</td></tr> <tr><td>Lab 13</td><td>N.D.</td><td>N.D.</td><td>N.D.</td><td>N.D.</td><td>N.D.</td><td>N.D.</td><td>N.D.</td></tr> <tr><td>Lab 15</td><td>N.D.</td><td>N.D.</td><td>N.D.</td><td>N.D.</td><td>N.D.</td><td>N.D.</td><td>N.D.</td></tr> <tr><td>Lab 9</td><td>N.D.</td><td>N.D.</td><td>N.D.</td><td>N.D.</td><td>N.D.</td><td>N.D.</td><td>N.D.</td></tr> <tr><td>Lab 2</td><td>N.D.</td><td>N.D.</td><td>N.D.</td><td>N.D.</td><td>N.D.</td><td>N.D.</td><td>N.D.</td></tr> <tr><td>Lab 18</td><td>N.D.</td><td>N.D.</td><td>N.D.</td><td>N.D.</td><td>N.D.</td><td>N.D.</td><td>N.D.</td></tr> <tr><td>Lab 17</td><td>3</td><td>11.63</td><td>652.83</td><td>841.19</td><td>+ESI</td><td>AD2</td><td>a</td></tr> <tr><td>Lab 10</td><td>N.D.</td><td>N.D.</td><td>N.D.</td><td>N.D.</td><td>N.D.</td><td>N.D.</td><td>N.D.</td></tr> <tr><td>Lab 7</td><td>N.D.</td><td>N.D.</td><td>N.D.</td><td>N.D.</td><td>N.D.</td><td>N.D.</td><td>N.D.</td></tr> </tbody> </table> <p>AD2: Although there is error, exp. &amp; pred. tR are accepted for this candidate (box2)<br/> AD3: Pred./Exp. tR are not reliable (high SR; use other verification tools (box3))<br/> N.D.: Not detected.<br/> All institutes have acceptable exp. RTI values and the difference is <b>not significant at 99% CIs</b> of the calibration curve. <b>Promote "Lab 17" to level 2!</b></p> | Institute | Level of identification confidence | Exp. tR   | Exp. RTI | Pred. RTI          | ESI mode | Application domain | MCP | Lab 6 | N.D. | N.D. | N.D. | N.D. | N.D. | N.D. | N.D. | Lab 5 | N.D. | N.D. | N.D. | N.D. | N.D. | N.D. | N.D. | Lab 4 | 2 | 11.22 | 612.66 | 841.19 | +ESI | AD3 | a | Lab 12 | 2a   | 7.11 | 732.56 | 841.19 | +ESI | AD2  | a    | Lab 13 | N.D. | N.D.  | N.D.   | N.D.   | N.D. | N.D. | N.D. | Lab 15 | N.D. | N.D. | N.D. | N.D. | N.D. | N.D. | N.D. | Lab 9 | N.D. | N.D. | N.D. | N.D. | N.D. | N.D. | N.D. | Lab 2 | N.D. | N.D. | N.D. | N.D. | N.D. | N.D. | N.D. | Lab 18 | N.D. | N.D. | N.D. | N.D. | N.D. | N.D. | N.D. | Lab 17 | 3    | 11.63 | 652.83 | 841.19 | +ESI | AD2  | a    | Lab 10 | N.D. | N.D. | N.D. | N.D. | N.D. | N.D. | N.D. | Lab 7 | N.D. | N.D. | N.D. | N.D. | N.D. | N.D. | N.D. |
|        | Institute                                                                                                                                                                             | Level of identification confidence                                                                                                                                                                                                                                                                                                                                                                                                                                                                                                                                                                                                                                                                                                                                                                                                                                                                                                                                                                                                                                                                                                                                                                                                                                                                                                                                                                                                                                                                                                                                                                                                                                                                                                                                                                                                                                                                                                                                                                                                                                                                                                      | Exp. tR   | Exp. RTI                           | Pred. RTI | ESI mode | Application domain | MCP      |                    |     |       |      |      |      |      |      |      |      |       |      |      |      |      |      |      |      |       |   |       |        |        |      |     |   |        |      |      |        |        |      |      |      |        |      |       |        |        |      |      |      |        |      |      |      |      |      |      |      |       |      |      |      |      |      |      |      |       |      |      |      |      |      |      |      |        |      |      |      |      |      |      |      |        |      |       |        |        |      |      |      |        |      |      |      |      |      |      |      |       |      |      |      |      |      |      |      |
| Lab 6  | N.D.                                                                                                                                                                                  | N.D.                                                                                                                                                                                                                                                                                                                                                                                                                                                                                                                                                                                                                                                                                                                                                                                                                                                                                                                                                                                                                                                                                                                                                                                                                                                                                                                                                                                                                                                                                                                                                                                                                                                                                                                                                                                                                                                                                                                                                                                                                                                                                                                                    | N.D.      | N.D.                               | N.D.      | N.D.     | N.D.               |          |                    |     |       |      |      |      |      |      |      |      |       |      |      |      |      |      |      |      |       |   |       |        |        |      |     |   |        |      |      |        |        |      |      |      |        |      |       |        |        |      |      |      |        |      |      |      |      |      |      |      |       |      |      |      |      |      |      |      |       |      |      |      |      |      |      |      |        |      |      |      |      |      |      |      |        |      |       |        |        |      |      |      |        |      |      |      |      |      |      |      |       |      |      |      |      |      |      |      |
| Lab 5  | N.D.                                                                                                                                                                                  | N.D.                                                                                                                                                                                                                                                                                                                                                                                                                                                                                                                                                                                                                                                                                                                                                                                                                                                                                                                                                                                                                                                                                                                                                                                                                                                                                                                                                                                                                                                                                                                                                                                                                                                                                                                                                                                                                                                                                                                                                                                                                                                                                                                                    | N.D.      | N.D.                               | N.D.      | N.D.     | N.D.               |          |                    |     |       |      |      |      |      |      |      |      |       |      |      |      |      |      |      |      |       |   |       |        |        |      |     |   |        |      |      |        |        |      |      |      |        |      |       |        |        |      |      |      |        |      |      |      |      |      |      |      |       |      |      |      |      |      |      |      |       |      |      |      |      |      |      |      |        |      |      |      |      |      |      |      |        |      |       |        |        |      |      |      |        |      |      |      |      |      |      |      |       |      |      |      |      |      |      |      |
| Lab 4  | 2                                                                                                                                                                                     | 11.22                                                                                                                                                                                                                                                                                                                                                                                                                                                                                                                                                                                                                                                                                                                                                                                                                                                                                                                                                                                                                                                                                                                                                                                                                                                                                                                                                                                                                                                                                                                                                                                                                                                                                                                                                                                                                                                                                                                                                                                                                                                                                                                                   | 612.66    | 841.19                             | +ESI      | AD3      | a                  |          |                    |     |       |      |      |      |      |      |      |      |       |      |      |      |      |      |      |      |       |   |       |        |        |      |     |   |        |      |      |        |        |      |      |      |        |      |       |        |        |      |      |      |        |      |      |      |      |      |      |      |       |      |      |      |      |      |      |      |       |      |      |      |      |      |      |      |        |      |      |      |      |      |      |      |        |      |       |        |        |      |      |      |        |      |      |      |      |      |      |      |       |      |      |      |      |      |      |      |
| Lab 12 | 2a                                                                                                                                                                                    | 7.11                                                                                                                                                                                                                                                                                                                                                                                                                                                                                                                                                                                                                                                                                                                                                                                                                                                                                                                                                                                                                                                                                                                                                                                                                                                                                                                                                                                                                                                                                                                                                                                                                                                                                                                                                                                                                                                                                                                                                                                                                                                                                                                                    | 732.56    | 841.19                             | +ESI      | AD2      | a                  |          |                    |     |       |      |      |      |      |      |      |      |       |      |      |      |      |      |      |      |       |   |       |        |        |      |     |   |        |      |      |        |        |      |      |      |        |      |       |        |        |      |      |      |        |      |      |      |      |      |      |      |       |      |      |      |      |      |      |      |       |      |      |      |      |      |      |      |        |      |      |      |      |      |      |      |        |      |       |        |        |      |      |      |        |      |      |      |      |      |      |      |       |      |      |      |      |      |      |      |
| Lab 13 | N.D.                                                                                                                                                                                  | N.D.                                                                                                                                                                                                                                                                                                                                                                                                                                                                                                                                                                                                                                                                                                                                                                                                                                                                                                                                                                                                                                                                                                                                                                                                                                                                                                                                                                                                                                                                                                                                                                                                                                                                                                                                                                                                                                                                                                                                                                                                                                                                                                                                    | N.D.      | N.D.                               | N.D.      | N.D.     | N.D.               |          |                    |     |       |      |      |      |      |      |      |      |       |      |      |      |      |      |      |      |       |   |       |        |        |      |     |   |        |      |      |        |        |      |      |      |        |      |       |        |        |      |      |      |        |      |      |      |      |      |      |      |       |      |      |      |      |      |      |      |       |      |      |      |      |      |      |      |        |      |      |      |      |      |      |      |        |      |       |        |        |      |      |      |        |      |      |      |      |      |      |      |       |      |      |      |      |      |      |      |
| Lab 15 | N.D.                                                                                                                                                                                  | N.D.                                                                                                                                                                                                                                                                                                                                                                                                                                                                                                                                                                                                                                                                                                                                                                                                                                                                                                                                                                                                                                                                                                                                                                                                                                                                                                                                                                                                                                                                                                                                                                                                                                                                                                                                                                                                                                                                                                                                                                                                                                                                                                                                    | N.D.      | N.D.                               | N.D.      | N.D.     | N.D.               |          |                    |     |       |      |      |      |      |      |      |      |       |      |      |      |      |      |      |      |       |   |       |        |        |      |     |   |        |      |      |        |        |      |      |      |        |      |       |        |        |      |      |      |        |      |      |      |      |      |      |      |       |      |      |      |      |      |      |      |       |      |      |      |      |      |      |      |        |      |      |      |      |      |      |      |        |      |       |        |        |      |      |      |        |      |      |      |      |      |      |      |       |      |      |      |      |      |      |      |
| Lab 9  | N.D.                                                                                                                                                                                  | N.D.                                                                                                                                                                                                                                                                                                                                                                                                                                                                                                                                                                                                                                                                                                                                                                                                                                                                                                                                                                                                                                                                                                                                                                                                                                                                                                                                                                                                                                                                                                                                                                                                                                                                                                                                                                                                                                                                                                                                                                                                                                                                                                                                    | N.D.      | N.D.                               | N.D.      | N.D.     | N.D.               |          |                    |     |       |      |      |      |      |      |      |      |       |      |      |      |      |      |      |      |       |   |       |        |        |      |     |   |        |      |      |        |        |      |      |      |        |      |       |        |        |      |      |      |        |      |      |      |      |      |      |      |       |      |      |      |      |      |      |      |       |      |      |      |      |      |      |      |        |      |      |      |      |      |      |      |        |      |       |        |        |      |      |      |        |      |      |      |      |      |      |      |       |      |      |      |      |      |      |      |
| Lab 2  | N.D.                                                                                                                                                                                  | N.D.                                                                                                                                                                                                                                                                                                                                                                                                                                                                                                                                                                                                                                                                                                                                                                                                                                                                                                                                                                                                                                                                                                                                                                                                                                                                                                                                                                                                                                                                                                                                                                                                                                                                                                                                                                                                                                                                                                                                                                                                                                                                                                                                    | N.D.      | N.D.                               | N.D.      | N.D.     | N.D.               |          |                    |     |       |      |      |      |      |      |      |      |       |      |      |      |      |      |      |      |       |   |       |        |        |      |     |   |        |      |      |        |        |      |      |      |        |      |       |        |        |      |      |      |        |      |      |      |      |      |      |      |       |      |      |      |      |      |      |      |       |      |      |      |      |      |      |      |        |      |      |      |      |      |      |      |        |      |       |        |        |      |      |      |        |      |      |      |      |      |      |      |       |      |      |      |      |      |      |      |
| Lab 18 | N.D.                                                                                                                                                                                  | N.D.                                                                                                                                                                                                                                                                                                                                                                                                                                                                                                                                                                                                                                                                                                                                                                                                                                                                                                                                                                                                                                                                                                                                                                                                                                                                                                                                                                                                                                                                                                                                                                                                                                                                                                                                                                                                                                                                                                                                                                                                                                                                                                                                    | N.D.      | N.D.                               | N.D.      | N.D.     | N.D.               |          |                    |     |       |      |      |      |      |      |      |      |       |      |      |      |      |      |      |      |       |   |       |        |        |      |     |   |        |      |      |        |        |      |      |      |        |      |       |        |        |      |      |      |        |      |      |      |      |      |      |      |       |      |      |      |      |      |      |      |       |      |      |      |      |      |      |      |        |      |      |      |      |      |      |      |        |      |       |        |        |      |      |      |        |      |      |      |      |      |      |      |       |      |      |      |      |      |      |      |
| Lab 17 | 3                                                                                                                                                                                     | 11.63                                                                                                                                                                                                                                                                                                                                                                                                                                                                                                                                                                                                                                                                                                                                                                                                                                                                                                                                                                                                                                                                                                                                                                                                                                                                                                                                                                                                                                                                                                                                                                                                                                                                                                                                                                                                                                                                                                                                                                                                                                                                                                                                   | 652.83    | 841.19                             | +ESI      | AD2      | a                  |          |                    |     |       |      |      |      |      |      |      |      |       |      |      |      |      |      |      |      |       |   |       |        |        |      |     |   |        |      |      |        |        |      |      |      |        |      |       |        |        |      |      |      |        |      |      |      |      |      |      |      |       |      |      |      |      |      |      |      |       |      |      |      |      |      |      |      |        |      |      |      |      |      |      |      |        |      |       |        |        |      |      |      |        |      |      |      |      |      |      |      |       |      |      |      |      |      |      |      |
| Lab 10 | N.D.                                                                                                                                                                                  | N.D.                                                                                                                                                                                                                                                                                                                                                                                                                                                                                                                                                                                                                                                                                                                                                                                                                                                                                                                                                                                                                                                                                                                                                                                                                                                                                                                                                                                                                                                                                                                                                                                                                                                                                                                                                                                                                                                                                                                                                                                                                                                                                                                                    | N.D.      | N.D.                               | N.D.      | N.D.     | N.D.               |          |                    |     |       |      |      |      |      |      |      |      |       |      |      |      |      |      |      |      |       |   |       |        |        |      |     |   |        |      |      |        |        |      |      |      |        |      |       |        |        |      |      |      |        |      |      |      |      |      |      |      |       |      |      |      |      |      |      |      |       |      |      |      |      |      |      |      |        |      |      |      |      |      |      |      |        |      |       |        |        |      |      |      |        |      |      |      |      |      |      |      |       |      |      |      |      |      |      |      |
| Lab 7  | N.D.                                                                                                                                                                                  | N.D.                                                                                                                                                                                                                                                                                                                                                                                                                                                                                                                                                                                                                                                                                                                                                                                                                                                                                                                                                                                                                                                                                                                                                                                                                                                                                                                                                                                                                                                                                                                                                                                                                                                                                                                                                                                                                                                                                                                                                                                                                                                                                                                                    | N.D.      | N.D.                               | N.D.      | N.D.     | N.D.               |          |                    |     |       |      |      |      |      |      |      |      |       |      |      |      |      |      |      |      |       |   |       |        |        |      |     |   |        |      |      |        |        |      |      |      |        |      |       |        |        |      |      |      |        |      |      |      |      |      |      |      |       |      |      |      |      |      |      |      |       |      |      |      |      |      |      |      |        |      |      |      |      |      |      |      |        |      |       |        |        |      |      |      |        |      |      |      |      |      |      |      |       |      |      |      |      |      |      |      |
| (33)   | <p style="text-align: center;"><b>Comparison of Exp. RTI values: Triethyl citrate</b></p> <p style="text-align: center;">No groups have means significantly different from Lab 04</p> | <table border="1" style="width: 100%; border-collapse: collapse;"> <thead> <tr> <th>Institute</th> <th>Level of identification confidence</th> <th>Exp. tR</th> <th>Exp. RTI</th> <th>Pred. RTI</th> <th>ESI mode</th> <th>Application domain</th> <th>MCP</th> </tr> </thead> <tbody> <tr><td>Lab 6</td><td>N.D.</td><td>N.D.</td><td>N.D.</td><td>N.D.</td><td>N.D.</td><td>N.D.</td><td>N.D.</td></tr> <tr><td>Lab 5</td><td>N.D.</td><td>N.D.</td><td>N.D.</td><td>N.D.</td><td>N.D.</td><td>N.D.</td><td>N.D.</td></tr> <tr><td>Lab 4</td><td>2</td><td>9.59</td><td>511.16</td><td>378.61</td><td>+ESI</td><td>AD2</td><td>a</td></tr> <tr><td>Lab 12</td><td>N.D.</td><td>N.D.</td><td>N.D.</td><td>N.D.</td><td>N.D.</td><td>N.D.</td><td>N.D.</td></tr> <tr><td>Lab 13</td><td>4</td><td>12.41</td><td>460.96</td><td>378.61</td><td>+ESI</td><td>AD1</td><td>a</td></tr> <tr><td>Lab 15</td><td>N.D.</td><td>N.D.</td><td>N.D.</td><td>N.D.</td><td>N.D.</td><td>N.D.</td><td>N.D.</td></tr> <tr><td>Lab 9</td><td>N.D.</td><td>N.D.</td><td>N.D.</td><td>N.D.</td><td>N.D.</td><td>N.D.</td><td>N.D.</td></tr> <tr><td>Lab 2</td><td>N.D.</td><td>N.D.</td><td>N.D.</td><td>N.D.</td><td>N.D.</td><td>N.D.</td><td>N.D.</td></tr> <tr><td>Lab 18</td><td>N.D.</td><td>N.D.</td><td>N.D.</td><td>N.D.</td><td>N.D.</td><td>N.D.</td><td>N.D.</td></tr> <tr><td>Lab 17</td><td>N.D.</td><td>N.D.</td><td>N.D.</td><td>N.D.</td><td>N.D.</td><td>N.D.</td><td>N.D.</td></tr> <tr><td>Lab 10</td><td>N.D.</td><td>N.D.</td><td>N.D.</td><td>N.D.</td><td>N.D.</td><td>N.D.</td><td>N.D.</td></tr> <tr><td>Lab 7</td><td>N.D.</td><td>N.D.</td><td>N.D.</td><td>N.D.</td><td>N.D.</td><td>N.D.</td><td>N.D.</td></tr> </tbody> </table> <p>AD1: Exp. &amp; Pred. tR are accepted for this candidate (box1)<br/> AD2: Although there is error, exp. &amp; pred. tR are accepted for this candidate (box2)<br/> N.D.: Not detected.<br/> All institutes have acceptable exp. RTI values and the difference is <b>not significant at 99% CIs</b> of the calibration curve. <b>Promote "Lab 13" to level 2!</b></p>                   | Institute | Level of identification confidence | Exp. tR   | Exp. RTI | Pred. RTI          | ESI mode | Application domain | MCP | Lab 6 | N.D. | N.D. | N.D. | N.D. | N.D. | N.D. | N.D. | Lab 5 | N.D. | N.D. | N.D. | N.D. | N.D. | N.D. | N.D. | Lab 4 | 2 | 9.59  | 511.16 | 378.61 | +ESI | AD2 | a | Lab 12 | N.D. | N.D. | N.D.   | N.D.   | N.D. | N.D. | N.D. | Lab 13 | 4    | 12.41 | 460.96 | 378.61 | +ESI | AD1  | a    | Lab 15 | N.D. | N.D. | N.D. | N.D. | N.D. | N.D. | N.D. | Lab 9 | N.D. | N.D. | N.D. | N.D. | N.D. | N.D. | N.D. | Lab 2 | N.D. | N.D. | N.D. | N.D. | N.D. | N.D. | N.D. | Lab 18 | N.D. | N.D. | N.D. | N.D. | N.D. | N.D. | N.D. | Lab 17 | N.D. | N.D.  | N.D.   | N.D.   | N.D. | N.D. | N.D. | Lab 10 | N.D. | N.D. | N.D. | N.D. | N.D. | N.D. | N.D. | Lab 7 | N.D. | N.D. | N.D. | N.D. | N.D. | N.D. | N.D. |
|        | Institute                                                                                                                                                                             | Level of identification confidence                                                                                                                                                                                                                                                                                                                                                                                                                                                                                                                                                                                                                                                                                                                                                                                                                                                                                                                                                                                                                                                                                                                                                                                                                                                                                                                                                                                                                                                                                                                                                                                                                                                                                                                                                                                                                                                                                                                                                                                                                                                                                                      | Exp. tR   | Exp. RTI                           | Pred. RTI | ESI mode | Application domain | MCP      |                    |     |       |      |      |      |      |      |      |      |       |      |      |      |      |      |      |      |       |   |       |        |        |      |     |   |        |      |      |        |        |      |      |      |        |      |       |        |        |      |      |      |        |      |      |      |      |      |      |      |       |      |      |      |      |      |      |      |       |      |      |      |      |      |      |      |        |      |      |      |      |      |      |      |        |      |       |        |        |      |      |      |        |      |      |      |      |      |      |      |       |      |      |      |      |      |      |      |
| Lab 6  | N.D.                                                                                                                                                                                  | N.D.                                                                                                                                                                                                                                                                                                                                                                                                                                                                                                                                                                                                                                                                                                                                                                                                                                                                                                                                                                                                                                                                                                                                                                                                                                                                                                                                                                                                                                                                                                                                                                                                                                                                                                                                                                                                                                                                                                                                                                                                                                                                                                                                    | N.D.      | N.D.                               | N.D.      | N.D.     | N.D.               |          |                    |     |       |      |      |      |      |      |      |      |       |      |      |      |      |      |      |      |       |   |       |        |        |      |     |   |        |      |      |        |        |      |      |      |        |      |       |        |        |      |      |      |        |      |      |      |      |      |      |      |       |      |      |      |      |      |      |      |       |      |      |      |      |      |      |      |        |      |      |      |      |      |      |      |        |      |       |        |        |      |      |      |        |      |      |      |      |      |      |      |       |      |      |      |      |      |      |      |
| Lab 5  | N.D.                                                                                                                                                                                  | N.D.                                                                                                                                                                                                                                                                                                                                                                                                                                                                                                                                                                                                                                                                                                                                                                                                                                                                                                                                                                                                                                                                                                                                                                                                                                                                                                                                                                                                                                                                                                                                                                                                                                                                                                                                                                                                                                                                                                                                                                                                                                                                                                                                    | N.D.      | N.D.                               | N.D.      | N.D.     | N.D.               |          |                    |     |       |      |      |      |      |      |      |      |       |      |      |      |      |      |      |      |       |   |       |        |        |      |     |   |        |      |      |        |        |      |      |      |        |      |       |        |        |      |      |      |        |      |      |      |      |      |      |      |       |      |      |      |      |      |      |      |       |      |      |      |      |      |      |      |        |      |      |      |      |      |      |      |        |      |       |        |        |      |      |      |        |      |      |      |      |      |      |      |       |      |      |      |      |      |      |      |
| Lab 4  | 2                                                                                                                                                                                     | 9.59                                                                                                                                                                                                                                                                                                                                                                                                                                                                                                                                                                                                                                                                                                                                                                                                                                                                                                                                                                                                                                                                                                                                                                                                                                                                                                                                                                                                                                                                                                                                                                                                                                                                                                                                                                                                                                                                                                                                                                                                                                                                                                                                    | 511.16    | 378.61                             | +ESI      | AD2      | a                  |          |                    |     |       |      |      |      |      |      |      |      |       |      |      |      |      |      |      |      |       |   |       |        |        |      |     |   |        |      |      |        |        |      |      |      |        |      |       |        |        |      |      |      |        |      |      |      |      |      |      |      |       |      |      |      |      |      |      |      |       |      |      |      |      |      |      |      |        |      |      |      |      |      |      |      |        |      |       |        |        |      |      |      |        |      |      |      |      |      |      |      |       |      |      |      |      |      |      |      |
| Lab 12 | N.D.                                                                                                                                                                                  | N.D.                                                                                                                                                                                                                                                                                                                                                                                                                                                                                                                                                                                                                                                                                                                                                                                                                                                                                                                                                                                                                                                                                                                                                                                                                                                                                                                                                                                                                                                                                                                                                                                                                                                                                                                                                                                                                                                                                                                                                                                                                                                                                                                                    | N.D.      | N.D.                               | N.D.      | N.D.     | N.D.               |          |                    |     |       |      |      |      |      |      |      |      |       |      |      |      |      |      |      |      |       |   |       |        |        |      |     |   |        |      |      |        |        |      |      |      |        |      |       |        |        |      |      |      |        |      |      |      |      |      |      |      |       |      |      |      |      |      |      |      |       |      |      |      |      |      |      |      |        |      |      |      |      |      |      |      |        |      |       |        |        |      |      |      |        |      |      |      |      |      |      |      |       |      |      |      |      |      |      |      |
| Lab 13 | 4                                                                                                                                                                                     | 12.41                                                                                                                                                                                                                                                                                                                                                                                                                                                                                                                                                                                                                                                                                                                                                                                                                                                                                                                                                                                                                                                                                                                                                                                                                                                                                                                                                                                                                                                                                                                                                                                                                                                                                                                                                                                                                                                                                                                                                                                                                                                                                                                                   | 460.96    | 378.61                             | +ESI      | AD1      | a                  |          |                    |     |       |      |      |      |      |      |      |      |       |      |      |      |      |      |      |      |       |   |       |        |        |      |     |   |        |      |      |        |        |      |      |      |        |      |       |        |        |      |      |      |        |      |      |      |      |      |      |      |       |      |      |      |      |      |      |      |       |      |      |      |      |      |      |      |        |      |      |      |      |      |      |      |        |      |       |        |        |      |      |      |        |      |      |      |      |      |      |      |       |      |      |      |      |      |      |      |
| Lab 15 | N.D.                                                                                                                                                                                  | N.D.                                                                                                                                                                                                                                                                                                                                                                                                                                                                                                                                                                                                                                                                                                                                                                                                                                                                                                                                                                                                                                                                                                                                                                                                                                                                                                                                                                                                                                                                                                                                                                                                                                                                                                                                                                                                                                                                                                                                                                                                                                                                                                                                    | N.D.      | N.D.                               | N.D.      | N.D.     | N.D.               |          |                    |     |       |      |      |      |      |      |      |      |       |      |      |      |      |      |      |      |       |   |       |        |        |      |     |   |        |      |      |        |        |      |      |      |        |      |       |        |        |      |      |      |        |      |      |      |      |      |      |      |       |      |      |      |      |      |      |      |       |      |      |      |      |      |      |      |        |      |      |      |      |      |      |      |        |      |       |        |        |      |      |      |        |      |      |      |      |      |      |      |       |      |      |      |      |      |      |      |
| Lab 9  | N.D.                                                                                                                                                                                  | N.D.                                                                                                                                                                                                                                                                                                                                                                                                                                                                                                                                                                                                                                                                                                                                                                                                                                                                                                                                                                                                                                                                                                                                                                                                                                                                                                                                                                                                                                                                                                                                                                                                                                                                                                                                                                                                                                                                                                                                                                                                                                                                                                                                    | N.D.      | N.D.                               | N.D.      | N.D.     | N.D.               |          |                    |     |       |      |      |      |      |      |      |      |       |      |      |      |      |      |      |      |       |   |       |        |        |      |     |   |        |      |      |        |        |      |      |      |        |      |       |        |        |      |      |      |        |      |      |      |      |      |      |      |       |      |      |      |      |      |      |      |       |      |      |      |      |      |      |      |        |      |      |      |      |      |      |      |        |      |       |        |        |      |      |      |        |      |      |      |      |      |      |      |       |      |      |      |      |      |      |      |
| Lab 2  | N.D.                                                                                                                                                                                  | N.D.                                                                                                                                                                                                                                                                                                                                                                                                                                                                                                                                                                                                                                                                                                                                                                                                                                                                                                                                                                                                                                                                                                                                                                                                                                                                                                                                                                                                                                                                                                                                                                                                                                                                                                                                                                                                                                                                                                                                                                                                                                                                                                                                    | N.D.      | N.D.                               | N.D.      | N.D.     | N.D.               |          |                    |     |       |      |      |      |      |      |      |      |       |      |      |      |      |      |      |      |       |   |       |        |        |      |     |   |        |      |      |        |        |      |      |      |        |      |       |        |        |      |      |      |        |      |      |      |      |      |      |      |       |      |      |      |      |      |      |      |       |      |      |      |      |      |      |      |        |      |      |      |      |      |      |      |        |      |       |        |        |      |      |      |        |      |      |      |      |      |      |      |       |      |      |      |      |      |      |      |
| Lab 18 | N.D.                                                                                                                                                                                  | N.D.                                                                                                                                                                                                                                                                                                                                                                                                                                                                                                                                                                                                                                                                                                                                                                                                                                                                                                                                                                                                                                                                                                                                                                                                                                                                                                                                                                                                                                                                                                                                                                                                                                                                                                                                                                                                                                                                                                                                                                                                                                                                                                                                    | N.D.      | N.D.                               | N.D.      | N.D.     | N.D.               |          |                    |     |       |      |      |      |      |      |      |      |       |      |      |      |      |      |      |      |       |   |       |        |        |      |     |   |        |      |      |        |        |      |      |      |        |      |       |        |        |      |      |      |        |      |      |      |      |      |      |      |       |      |      |      |      |      |      |      |       |      |      |      |      |      |      |      |        |      |      |      |      |      |      |      |        |      |       |        |        |      |      |      |        |      |      |      |      |      |      |      |       |      |      |      |      |      |      |      |
| Lab 17 | N.D.                                                                                                                                                                                  | N.D.                                                                                                                                                                                                                                                                                                                                                                                                                                                                                                                                                                                                                                                                                                                                                                                                                                                                                                                                                                                                                                                                                                                                                                                                                                                                                                                                                                                                                                                                                                                                                                                                                                                                                                                                                                                                                                                                                                                                                                                                                                                                                                                                    | N.D.      | N.D.                               | N.D.      | N.D.     | N.D.               |          |                    |     |       |      |      |      |      |      |      |      |       |      |      |      |      |      |      |      |       |   |       |        |        |      |     |   |        |      |      |        |        |      |      |      |        |      |       |        |        |      |      |      |        |      |      |      |      |      |      |      |       |      |      |      |      |      |      |      |       |      |      |      |      |      |      |      |        |      |      |      |      |      |      |      |        |      |       |        |        |      |      |      |        |      |      |      |      |      |      |      |       |      |      |      |      |      |      |      |
| Lab 10 | N.D.                                                                                                                                                                                  | N.D.                                                                                                                                                                                                                                                                                                                                                                                                                                                                                                                                                                                                                                                                                                                                                                                                                                                                                                                                                                                                                                                                                                                                                                                                                                                                                                                                                                                                                                                                                                                                                                                                                                                                                                                                                                                                                                                                                                                                                                                                                                                                                                                                    | N.D.      | N.D.                               | N.D.      | N.D.     | N.D.               |          |                    |     |       |      |      |      |      |      |      |      |       |      |      |      |      |      |      |      |       |   |       |        |        |      |     |   |        |      |      |        |        |      |      |      |        |      |       |        |        |      |      |      |        |      |      |      |      |      |      |      |       |      |      |      |      |      |      |      |       |      |      |      |      |      |      |      |        |      |      |      |      |      |      |      |        |      |       |        |        |      |      |      |        |      |      |      |      |      |      |      |       |      |      |      |      |      |      |      |
| Lab 7  | N.D.                                                                                                                                                                                  | N.D.                                                                                                                                                                                                                                                                                                                                                                                                                                                                                                                                                                                                                                                                                                                                                                                                                                                                                                                                                                                                                                                                                                                                                                                                                                                                                                                                                                                                                                                                                                                                                                                                                                                                                                                                                                                                                                                                                                                                                                                                                                                                                                                                    | N.D.      | N.D.                               | N.D.      | N.D.     | N.D.               |          |                    |     |       |      |      |      |      |      |      |      |       |      |      |      |      |      |      |      |       |   |       |        |        |      |     |   |        |      |      |        |        |      |      |      |        |      |       |        |        |      |      |      |        |      |      |      |      |      |      |      |       |      |      |      |      |      |      |      |       |      |      |      |      |      |      |      |        |      |      |      |      |      |      |      |        |      |       |        |        |      |      |      |        |      |      |      |      |      |      |      |       |      |      |      |      |      |      |      |

| No.  | multiple comparison procedure plot                                                                                                                                                         | RTI details                                                                                                                                                                                                                                                                                                                                                                                                                                                                                                                                                                                                                                                                                                                                                                                                                                                                                                                                                                                                                                                                                                                                                                                                                                                                                                                                                                                                                                                                                                                                                                                                                                                                                                                                                                                            |                                    |                                    |          |           |           |                    |                    |     |       |      |      |      |      |      |      |      |       |      |      |      |      |      |      |      |       |   |      |        |        |      |     |   |        |    |      |        |        |      |     |   |        |   |      |        |        |      |     |   |        |      |      |      |      |      |      |      |       |      |      |      |      |      |      |      |       |      |      |      |      |      |      |      |        |      |      |      |      |      |      |      |        |      |      |      |      |      |      |      |        |      |      |      |      |      |      |      |       |      |      |      |      |      |      |      |  |  |  |  |  |  |  |
|------|--------------------------------------------------------------------------------------------------------------------------------------------------------------------------------------------|--------------------------------------------------------------------------------------------------------------------------------------------------------------------------------------------------------------------------------------------------------------------------------------------------------------------------------------------------------------------------------------------------------------------------------------------------------------------------------------------------------------------------------------------------------------------------------------------------------------------------------------------------------------------------------------------------------------------------------------------------------------------------------------------------------------------------------------------------------------------------------------------------------------------------------------------------------------------------------------------------------------------------------------------------------------------------------------------------------------------------------------------------------------------------------------------------------------------------------------------------------------------------------------------------------------------------------------------------------------------------------------------------------------------------------------------------------------------------------------------------------------------------------------------------------------------------------------------------------------------------------------------------------------------------------------------------------------------------------------------------------------------------------------------------------|------------------------------------|------------------------------------|----------|-----------|-----------|--------------------|--------------------|-----|-------|------|------|------|------|------|------|------|-------|------|------|------|------|------|------|------|-------|---|------|--------|--------|------|-----|---|--------|----|------|--------|--------|------|-----|---|--------|---|------|--------|--------|------|-----|---|--------|------|------|------|------|------|------|------|-------|------|------|------|------|------|------|------|-------|------|------|------|------|------|------|------|--------|------|------|------|------|------|------|------|--------|------|------|------|------|------|------|------|--------|------|------|------|------|------|------|------|-------|------|------|------|------|------|------|------|--|--|--|--|--|--|--|
| (34) | <p style="text-align: center;"><b>Comparison of Exp. RTI values: 1,3-Diphenylguanidine</b></p> <p style="text-align: center;">No groups have means significantly different from Lab 04</p> | <table border="1"> <thead> <tr> <th>Institute</th> <th>Level of identification confidence</th> <th>Exp. tR</th> <th>Exp. RTI</th> <th>Pred. RTI</th> <th>ESI mode</th> <th>Application domain</th> <th>MCP</th> </tr> </thead> <tbody> <tr> <td>Lab 6</td> <td>N.D.</td> <td>N.D.</td> <td>N.D.</td> <td>N.D.</td> <td>N.D.</td> <td>N.D.</td> <td>N.D.</td> </tr> <tr> <td>Lab 5</td> <td>N.D.</td> <td>N.D.</td> <td>N.D.</td> <td>N.D.</td> <td>N.D.</td> <td>N.D.</td> <td>N.D.</td> </tr> <tr> <td>Lab 4</td> <td>1</td> <td>6.55</td> <td>321.68</td> <td>361.26</td> <td>+ESI</td> <td>AD1</td> <td>a</td> </tr> <tr> <td>Lab 12</td> <td>2a</td> <td>2.96</td> <td>276.26</td> <td>361.26</td> <td>+ESI</td> <td>AD1</td> <td>a</td> </tr> <tr> <td>Lab 13</td> <td>3</td> <td>8.20</td> <td>300.23</td> <td>361.26</td> <td>+ESI</td> <td>AD1</td> <td>a</td> </tr> <tr> <td>Lab 15</td> <td>N.D.</td> <td>N.D.</td> <td>N.D.</td> <td>N.D.</td> <td>N.D.</td> <td>N.D.</td> <td>N.D.</td> </tr> <tr> <td>Lab 9</td> <td>N.D.</td> <td>N.D.</td> <td>N.D.</td> <td>N.D.</td> <td>N.D.</td> <td>N.D.</td> <td>N.D.</td> </tr> <tr> <td>Lab 2</td> <td>N.D.</td> <td>N.D.</td> <td>N.D.</td> <td>N.D.</td> <td>N.D.</td> <td>N.D.</td> <td>N.D.</td> </tr> <tr> <td>Lab 18</td> <td>N.D.</td> <td>N.D.</td> <td>N.D.</td> <td>N.D.</td> <td>N.D.</td> <td>N.D.</td> <td>N.D.</td> </tr> <tr> <td>Lab 17</td> <td>N.D.</td> <td>N.D.</td> <td>N.D.</td> <td>N.D.</td> <td>N.D.</td> <td>N.D.</td> <td>N.D.</td> </tr> <tr> <td>Lab 10</td> <td>N.D.</td> <td>N.D.</td> <td>N.D.</td> <td>N.D.</td> <td>N.D.</td> <td>N.D.</td> <td>N.D.</td> </tr> <tr> <td>Lab 7</td> <td>N.D.</td> <td>N.D.</td> <td>N.D.</td> <td>N.D.</td> <td>N.D.</td> <td>N.D.</td> <td>N.D.</td> </tr> </tbody> </table> | Institute                          | Level of identification confidence | Exp. tR  | Exp. RTI  | Pred. RTI | ESI mode           | Application domain | MCP | Lab 6 | N.D. | N.D. | N.D. | N.D. | N.D. | N.D. | N.D. | Lab 5 | N.D. | N.D. | N.D. | N.D. | N.D. | N.D. | N.D. | Lab 4 | 1 | 6.55 | 321.68 | 361.26 | +ESI | AD1 | a | Lab 12 | 2a | 2.96 | 276.26 | 361.26 | +ESI | AD1 | a | Lab 13 | 3 | 8.20 | 300.23 | 361.26 | +ESI | AD1 | a | Lab 15 | N.D. | N.D. | N.D. | N.D. | N.D. | N.D. | N.D. | Lab 9 | N.D. | N.D. | N.D. | N.D. | N.D. | N.D. | N.D. | Lab 2 | N.D. | N.D. | N.D. | N.D. | N.D. | N.D. | N.D. | Lab 18 | N.D. | N.D. | N.D. | N.D. | N.D. | N.D. | N.D. | Lab 17 | N.D. | N.D. | N.D. | N.D. | N.D. | N.D. | N.D. | Lab 10 | N.D. | N.D. | N.D. | N.D. | N.D. | N.D. | N.D. | Lab 7 | N.D. | N.D. | N.D. | N.D. | N.D. | N.D. | N.D. |  |  |  |  |  |  |  |
|      |                                                                                                                                                                                            | Institute                                                                                                                                                                                                                                                                                                                                                                                                                                                                                                                                                                                                                                                                                                                                                                                                                                                                                                                                                                                                                                                                                                                                                                                                                                                                                                                                                                                                                                                                                                                                                                                                                                                                                                                                                                                              | Level of identification confidence | Exp. tR                            | Exp. RTI | Pred. RTI | ESI mode  | Application domain | MCP                |     |       |      |      |      |      |      |      |      |       |      |      |      |      |      |      |      |       |   |      |        |        |      |     |   |        |    |      |        |        |      |     |   |        |   |      |        |        |      |     |   |        |      |      |      |      |      |      |      |       |      |      |      |      |      |      |      |       |      |      |      |      |      |      |      |        |      |      |      |      |      |      |      |        |      |      |      |      |      |      |      |        |      |      |      |      |      |      |      |       |      |      |      |      |      |      |      |  |  |  |  |  |  |  |
|      |                                                                                                                                                                                            | Lab 6                                                                                                                                                                                                                                                                                                                                                                                                                                                                                                                                                                                                                                                                                                                                                                                                                                                                                                                                                                                                                                                                                                                                                                                                                                                                                                                                                                                                                                                                                                                                                                                                                                                                                                                                                                                                  | N.D.                               | N.D.                               | N.D.     | N.D.      | N.D.      | N.D.               | N.D.               |     |       |      |      |      |      |      |      |      |       |      |      |      |      |      |      |      |       |   |      |        |        |      |     |   |        |    |      |        |        |      |     |   |        |   |      |        |        |      |     |   |        |      |      |      |      |      |      |      |       |      |      |      |      |      |      |      |       |      |      |      |      |      |      |      |        |      |      |      |      |      |      |      |        |      |      |      |      |      |      |      |        |      |      |      |      |      |      |      |       |      |      |      |      |      |      |      |  |  |  |  |  |  |  |
|      |                                                                                                                                                                                            | Lab 5                                                                                                                                                                                                                                                                                                                                                                                                                                                                                                                                                                                                                                                                                                                                                                                                                                                                                                                                                                                                                                                                                                                                                                                                                                                                                                                                                                                                                                                                                                                                                                                                                                                                                                                                                                                                  | N.D.                               | N.D.                               | N.D.     | N.D.      | N.D.      | N.D.               | N.D.               |     |       |      |      |      |      |      |      |      |       |      |      |      |      |      |      |      |       |   |      |        |        |      |     |   |        |    |      |        |        |      |     |   |        |   |      |        |        |      |     |   |        |      |      |      |      |      |      |      |       |      |      |      |      |      |      |      |       |      |      |      |      |      |      |      |        |      |      |      |      |      |      |      |        |      |      |      |      |      |      |      |        |      |      |      |      |      |      |      |       |      |      |      |      |      |      |      |  |  |  |  |  |  |  |
|      |                                                                                                                                                                                            | Lab 4                                                                                                                                                                                                                                                                                                                                                                                                                                                                                                                                                                                                                                                                                                                                                                                                                                                                                                                                                                                                                                                                                                                                                                                                                                                                                                                                                                                                                                                                                                                                                                                                                                                                                                                                                                                                  | 1                                  | 6.55                               | 321.68   | 361.26    | +ESI      | AD1                | a                  |     |       |      |      |      |      |      |      |      |       |      |      |      |      |      |      |      |       |   |      |        |        |      |     |   |        |    |      |        |        |      |     |   |        |   |      |        |        |      |     |   |        |      |      |      |      |      |      |      |       |      |      |      |      |      |      |      |       |      |      |      |      |      |      |      |        |      |      |      |      |      |      |      |        |      |      |      |      |      |      |      |        |      |      |      |      |      |      |      |       |      |      |      |      |      |      |      |  |  |  |  |  |  |  |
|      |                                                                                                                                                                                            | Lab 12                                                                                                                                                                                                                                                                                                                                                                                                                                                                                                                                                                                                                                                                                                                                                                                                                                                                                                                                                                                                                                                                                                                                                                                                                                                                                                                                                                                                                                                                                                                                                                                                                                                                                                                                                                                                 | 2a                                 | 2.96                               | 276.26   | 361.26    | +ESI      | AD1                | a                  |     |       |      |      |      |      |      |      |      |       |      |      |      |      |      |      |      |       |   |      |        |        |      |     |   |        |    |      |        |        |      |     |   |        |   |      |        |        |      |     |   |        |      |      |      |      |      |      |      |       |      |      |      |      |      |      |      |       |      |      |      |      |      |      |      |        |      |      |      |      |      |      |      |        |      |      |      |      |      |      |      |        |      |      |      |      |      |      |      |       |      |      |      |      |      |      |      |  |  |  |  |  |  |  |
|      |                                                                                                                                                                                            | Lab 13                                                                                                                                                                                                                                                                                                                                                                                                                                                                                                                                                                                                                                                                                                                                                                                                                                                                                                                                                                                                                                                                                                                                                                                                                                                                                                                                                                                                                                                                                                                                                                                                                                                                                                                                                                                                 | 3                                  | 8.20                               | 300.23   | 361.26    | +ESI      | AD1                | a                  |     |       |      |      |      |      |      |      |      |       |      |      |      |      |      |      |      |       |   |      |        |        |      |     |   |        |    |      |        |        |      |     |   |        |   |      |        |        |      |     |   |        |      |      |      |      |      |      |      |       |      |      |      |      |      |      |      |       |      |      |      |      |      |      |      |        |      |      |      |      |      |      |      |        |      |      |      |      |      |      |      |        |      |      |      |      |      |      |      |       |      |      |      |      |      |      |      |  |  |  |  |  |  |  |
|      |                                                                                                                                                                                            | Lab 15                                                                                                                                                                                                                                                                                                                                                                                                                                                                                                                                                                                                                                                                                                                                                                                                                                                                                                                                                                                                                                                                                                                                                                                                                                                                                                                                                                                                                                                                                                                                                                                                                                                                                                                                                                                                 | N.D.                               | N.D.                               | N.D.     | N.D.      | N.D.      | N.D.               | N.D.               |     |       |      |      |      |      |      |      |      |       |      |      |      |      |      |      |      |       |   |      |        |        |      |     |   |        |    |      |        |        |      |     |   |        |   |      |        |        |      |     |   |        |      |      |      |      |      |      |      |       |      |      |      |      |      |      |      |       |      |      |      |      |      |      |      |        |      |      |      |      |      |      |      |        |      |      |      |      |      |      |      |        |      |      |      |      |      |      |      |       |      |      |      |      |      |      |      |  |  |  |  |  |  |  |
|      |                                                                                                                                                                                            | Lab 9                                                                                                                                                                                                                                                                                                                                                                                                                                                                                                                                                                                                                                                                                                                                                                                                                                                                                                                                                                                                                                                                                                                                                                                                                                                                                                                                                                                                                                                                                                                                                                                                                                                                                                                                                                                                  | N.D.                               | N.D.                               | N.D.     | N.D.      | N.D.      | N.D.               | N.D.               |     |       |      |      |      |      |      |      |      |       |      |      |      |      |      |      |      |       |   |      |        |        |      |     |   |        |    |      |        |        |      |     |   |        |   |      |        |        |      |     |   |        |      |      |      |      |      |      |      |       |      |      |      |      |      |      |      |       |      |      |      |      |      |      |      |        |      |      |      |      |      |      |      |        |      |      |      |      |      |      |      |        |      |      |      |      |      |      |      |       |      |      |      |      |      |      |      |  |  |  |  |  |  |  |
|      |                                                                                                                                                                                            | Lab 2                                                                                                                                                                                                                                                                                                                                                                                                                                                                                                                                                                                                                                                                                                                                                                                                                                                                                                                                                                                                                                                                                                                                                                                                                                                                                                                                                                                                                                                                                                                                                                                                                                                                                                                                                                                                  | N.D.                               | N.D.                               | N.D.     | N.D.      | N.D.      | N.D.               | N.D.               |     |       |      |      |      |      |      |      |      |       |      |      |      |      |      |      |      |       |   |      |        |        |      |     |   |        |    |      |        |        |      |     |   |        |   |      |        |        |      |     |   |        |      |      |      |      |      |      |      |       |      |      |      |      |      |      |      |       |      |      |      |      |      |      |      |        |      |      |      |      |      |      |      |        |      |      |      |      |      |      |      |        |      |      |      |      |      |      |      |       |      |      |      |      |      |      |      |  |  |  |  |  |  |  |
|      |                                                                                                                                                                                            | Lab 18                                                                                                                                                                                                                                                                                                                                                                                                                                                                                                                                                                                                                                                                                                                                                                                                                                                                                                                                                                                                                                                                                                                                                                                                                                                                                                                                                                                                                                                                                                                                                                                                                                                                                                                                                                                                 | N.D.                               | N.D.                               | N.D.     | N.D.      | N.D.      | N.D.               | N.D.               |     |       |      |      |      |      |      |      |      |       |      |      |      |      |      |      |      |       |   |      |        |        |      |     |   |        |    |      |        |        |      |     |   |        |   |      |        |        |      |     |   |        |      |      |      |      |      |      |      |       |      |      |      |      |      |      |      |       |      |      |      |      |      |      |      |        |      |      |      |      |      |      |      |        |      |      |      |      |      |      |      |        |      |      |      |      |      |      |      |       |      |      |      |      |      |      |      |  |  |  |  |  |  |  |
|      |                                                                                                                                                                                            | Lab 17                                                                                                                                                                                                                                                                                                                                                                                                                                                                                                                                                                                                                                                                                                                                                                                                                                                                                                                                                                                                                                                                                                                                                                                                                                                                                                                                                                                                                                                                                                                                                                                                                                                                                                                                                                                                 | N.D.                               | N.D.                               | N.D.     | N.D.      | N.D.      | N.D.               | N.D.               |     |       |      |      |      |      |      |      |      |       |      |      |      |      |      |      |      |       |   |      |        |        |      |     |   |        |    |      |        |        |      |     |   |        |   |      |        |        |      |     |   |        |      |      |      |      |      |      |      |       |      |      |      |      |      |      |      |       |      |      |      |      |      |      |      |        |      |      |      |      |      |      |      |        |      |      |      |      |      |      |      |        |      |      |      |      |      |      |      |       |      |      |      |      |      |      |      |  |  |  |  |  |  |  |
|      |                                                                                                                                                                                            | Lab 10                                                                                                                                                                                                                                                                                                                                                                                                                                                                                                                                                                                                                                                                                                                                                                                                                                                                                                                                                                                                                                                                                                                                                                                                                                                                                                                                                                                                                                                                                                                                                                                                                                                                                                                                                                                                 | N.D.                               | N.D.                               | N.D.     | N.D.      | N.D.      | N.D.               | N.D.               |     |       |      |      |      |      |      |      |      |       |      |      |      |      |      |      |      |       |   |      |        |        |      |     |   |        |    |      |        |        |      |     |   |        |   |      |        |        |      |     |   |        |      |      |      |      |      |      |      |       |      |      |      |      |      |      |      |       |      |      |      |      |      |      |      |        |      |      |      |      |      |      |      |        |      |      |      |      |      |      |      |        |      |      |      |      |      |      |      |       |      |      |      |      |      |      |      |  |  |  |  |  |  |  |
|      |                                                                                                                                                                                            | Lab 7                                                                                                                                                                                                                                                                                                                                                                                                                                                                                                                                                                                                                                                                                                                                                                                                                                                                                                                                                                                                                                                                                                                                                                                                                                                                                                                                                                                                                                                                                                                                                                                                                                                                                                                                                                                                  | N.D.                               | N.D.                               | N.D.     | N.D.      | N.D.      | N.D.               | N.D.               |     |       |      |      |      |      |      |      |      |       |      |      |      |      |      |      |      |       |   |      |        |        |      |     |   |        |    |      |        |        |      |     |   |        |   |      |        |        |      |     |   |        |      |      |      |      |      |      |      |       |      |      |      |      |      |      |      |       |      |      |      |      |      |      |      |        |      |      |      |      |      |      |      |        |      |      |      |      |      |      |      |        |      |      |      |      |      |      |      |       |      |      |      |      |      |      |      |  |  |  |  |  |  |  |
|      |                                                                                                                                                                                            |                                                                                                                                                                                                                                                                                                                                                                                                                                                                                                                                                                                                                                                                                                                                                                                                                                                                                                                                                                                                                                                                                                                                                                                                                                                                                                                                                                                                                                                                                                                                                                                                                                                                                                                                                                                                        |                                    |                                    |          |           |           |                    |                    |     |       |      |      |      |      |      |      |      |       |      |      |      |      |      |      |      |       |   |      |        |        |      |     |   |        |    |      |        |        |      |     |   |        |   |      |        |        |      |     |   |        |      |      |      |      |      |      |      |       |      |      |      |      |      |      |      |       |      |      |      |      |      |      |      |        |      |      |      |      |      |      |      |        |      |      |      |      |      |      |      |        |      |      |      |      |      |      |      |       |      |      |      |      |      |      |      |  |  |  |  |  |  |  |
|      |                                                                                                                                                                                            |                                                                                                                                                                                                                                                                                                                                                                                                                                                                                                                                                                                                                                                                                                                                                                                                                                                                                                                                                                                                                                                                                                                                                                                                                                                                                                                                                                                                                                                                                                                                                                                                                                                                                                                                                                                                        |                                    |                                    |          |           |           |                    |                    |     |       |      |      |      |      |      |      |      |       |      |      |      |      |      |      |      |       |   |      |        |        |      |     |   |        |    |      |        |        |      |     |   |        |   |      |        |        |      |     |   |        |      |      |      |      |      |      |      |       |      |      |      |      |      |      |      |       |      |      |      |      |      |      |      |        |      |      |      |      |      |      |      |        |      |      |      |      |      |      |      |        |      |      |      |      |      |      |      |       |      |      |      |      |      |      |      |  |  |  |  |  |  |  |
|      |                                                                                                                                                                                            |                                                                                                                                                                                                                                                                                                                                                                                                                                                                                                                                                                                                                                                                                                                                                                                                                                                                                                                                                                                                                                                                                                                                                                                                                                                                                                                                                                                                                                                                                                                                                                                                                                                                                                                                                                                                        |                                    |                                    |          |           |           |                    |                    |     |       |      |      |      |      |      |      |      |       |      |      |      |      |      |      |      |       |   |      |        |        |      |     |   |        |    |      |        |        |      |     |   |        |   |      |        |        |      |     |   |        |      |      |      |      |      |      |      |       |      |      |      |      |      |      |      |       |      |      |      |      |      |      |      |        |      |      |      |      |      |      |      |        |      |      |      |      |      |      |      |        |      |      |      |      |      |      |      |       |      |      |      |      |      |      |      |  |  |  |  |  |  |  |
|      |                                                                                                                                                                                            |                                                                                                                                                                                                                                                                                                                                                                                                                                                                                                                                                                                                                                                                                                                                                                                                                                                                                                                                                                                                                                                                                                                                                                                                                                                                                                                                                                                                                                                                                                                                                                                                                                                                                                                                                                                                        |                                    |                                    |          |           |           |                    |                    |     |       |      |      |      |      |      |      |      |       |      |      |      |      |      |      |      |       |   |      |        |        |      |     |   |        |    |      |        |        |      |     |   |        |   |      |        |        |      |     |   |        |      |      |      |      |      |      |      |       |      |      |      |      |      |      |      |       |      |      |      |      |      |      |      |        |      |      |      |      |      |      |      |        |      |      |      |      |      |      |      |        |      |      |      |      |      |      |      |       |      |      |      |      |      |      |      |  |  |  |  |  |  |  |
|      |                                                                                                                                                                                            |                                                                                                                                                                                                                                                                                                                                                                                                                                                                                                                                                                                                                                                                                                                                                                                                                                                                                                                                                                                                                                                                                                                                                                                                                                                                                                                                                                                                                                                                                                                                                                                                                                                                                                                                                                                                        |                                    |                                    |          |           |           |                    |                    |     |       |      |      |      |      |      |      |      |       |      |      |      |      |      |      |      |       |   |      |        |        |      |     |   |        |    |      |        |        |      |     |   |        |   |      |        |        |      |     |   |        |      |      |      |      |      |      |      |       |      |      |      |      |      |      |      |       |      |      |      |      |      |      |      |        |      |      |      |      |      |      |      |        |      |      |      |      |      |      |      |        |      |      |      |      |      |      |      |       |      |      |      |      |      |      |      |  |  |  |  |  |  |  |
|      |                                                                                                                                                                                            |                                                                                                                                                                                                                                                                                                                                                                                                                                                                                                                                                                                                                                                                                                                                                                                                                                                                                                                                                                                                                                                                                                                                                                                                                                                                                                                                                                                                                                                                                                                                                                                                                                                                                                                                                                                                        |                                    |                                    |          |           |           |                    |                    |     |       |      |      |      |      |      |      |      |       |      |      |      |      |      |      |      |       |   |      |        |        |      |     |   |        |    |      |        |        |      |     |   |        |   |      |        |        |      |     |   |        |      |      |      |      |      |      |      |       |      |      |      |      |      |      |      |       |      |      |      |      |      |      |      |        |      |      |      |      |      |      |      |        |      |      |      |      |      |      |      |        |      |      |      |      |      |      |      |       |      |      |      |      |      |      |      |  |  |  |  |  |  |  |
|      |                                                                                                                                                                                            |                                                                                                                                                                                                                                                                                                                                                                                                                                                                                                                                                                                                                                                                                                                                                                                                                                                                                                                                                                                                                                                                                                                                                                                                                                                                                                                                                                                                                                                                                                                                                                                                                                                                                                                                                                                                        |                                    |                                    |          |           |           |                    |                    |     |       |      |      |      |      |      |      |      |       |      |      |      |      |      |      |      |       |   |      |        |        |      |     |   |        |    |      |        |        |      |     |   |        |   |      |        |        |      |     |   |        |      |      |      |      |      |      |      |       |      |      |      |      |      |      |      |       |      |      |      |      |      |      |      |        |      |      |      |      |      |      |      |        |      |      |      |      |      |      |      |        |      |      |      |      |      |      |      |       |      |      |      |      |      |      |      |  |  |  |  |  |  |  |
|      |                                                                                                                                                                                            |                                                                                                                                                                                                                                                                                                                                                                                                                                                                                                                                                                                                                                                                                                                                                                                                                                                                                                                                                                                                                                                                                                                                                                                                                                                                                                                                                                                                                                                                                                                                                                                                                                                                                                                                                                                                        |                                    |                                    |          |           |           |                    |                    |     |       |      |      |      |      |      |      |      |       |      |      |      |      |      |      |      |       |   |      |        |        |      |     |   |        |    |      |        |        |      |     |   |        |   |      |        |        |      |     |   |        |      |      |      |      |      |      |      |       |      |      |      |      |      |      |      |       |      |      |      |      |      |      |      |        |      |      |      |      |      |      |      |        |      |      |      |      |      |      |      |        |      |      |      |      |      |      |      |       |      |      |      |      |      |      |      |  |  |  |  |  |  |  |
|      |                                                                                                                                                                                            |                                                                                                                                                                                                                                                                                                                                                                                                                                                                                                                                                                                                                                                                                                                                                                                                                                                                                                                                                                                                                                                                                                                                                                                                                                                                                                                                                                                                                                                                                                                                                                                                                                                                                                                                                                                                        |                                    |                                    |          |           |           |                    |                    |     |       |      |      |      |      |      |      |      |       |      |      |      |      |      |      |      |       |   |      |        |        |      |     |   |        |    |      |        |        |      |     |   |        |   |      |        |        |      |     |   |        |      |      |      |      |      |      |      |       |      |      |      |      |      |      |      |       |      |      |      |      |      |      |      |        |      |      |      |      |      |      |      |        |      |      |      |      |      |      |      |        |      |      |      |      |      |      |      |       |      |      |      |      |      |      |      |  |  |  |  |  |  |  |
|      |                                                                                                                                                                                            |                                                                                                                                                                                                                                                                                                                                                                                                                                                                                                                                                                                                                                                                                                                                                                                                                                                                                                                                                                                                                                                                                                                                                                                                                                                                                                                                                                                                                                                                                                                                                                                                                                                                                                                                                                                                        |                                    |                                    |          |           |           |                    |                    |     |       |      |      |      |      |      |      |      |       |      |      |      |      |      |      |      |       |   |      |        |        |      |     |   |        |    |      |        |        |      |     |   |        |   |      |        |        |      |     |   |        |      |      |      |      |      |      |      |       |      |      |      |      |      |      |      |       |      |      |      |      |      |      |      |        |      |      |      |      |      |      |      |        |      |      |      |      |      |      |      |        |      |      |      |      |      |      |      |       |      |      |      |      |      |      |      |  |  |  |  |  |  |  |
|      |                                                                                                                                                                                            |                                                                                                                                                                                                                                                                                                                                                                                                                                                                                                                                                                                                                                                                                                                                                                                                                                                                                                                                                                                                                                                                                                                                                                                                                                                                                                                                                                                                                                                                                                                                                                                                                                                                                                                                                                                                        |                                    |                                    |          |           |           |                    |                    |     |       |      |      |      |      |      |      |      |       |      |      |      |      |      |      |      |       |   |      |        |        |      |     |   |        |    |      |        |        |      |     |   |        |   |      |        |        |      |     |   |        |      |      |      |      |      |      |      |       |      |      |      |      |      |      |      |       |      |      |      |      |      |      |      |        |      |      |      |      |      |      |      |        |      |      |      |      |      |      |      |        |      |      |      |      |      |      |      |       |      |      |      |      |      |      |      |  |  |  |  |  |  |  |
|      |                                                                                                                                                                                            |                                                                                                                                                                                                                                                                                                                                                                                                                                                                                                                                                                                                                                                                                                                                                                                                                                                                                                                                                                                                                                                                                                                                                                                                                                                                                                                                                                                                                                                                                                                                                                                                                                                                                                                                                                                                        |                                    |                                    |          |           |           |                    |                    |     |       |      |      |      |      |      |      |      |       |      |      |      |      |      |      |      |       |   |      |        |        |      |     |   |        |    |      |        |        |      |     |   |        |   |      |        |        |      |     |   |        |      |      |      |      |      |      |      |       |      |      |      |      |      |      |      |       |      |      |      |      |      |      |      |        |      |      |      |      |      |      |      |        |      |      |      |      |      |      |      |        |      |      |      |      |      |      |      |       |      |      |      |      |      |      |      |  |  |  |  |  |  |  |
|      |                                                                                                                                                                                            |                                                                                                                                                                                                                                                                                                                                                                                                                                                                                                                                                                                                                                                                                                                                                                                                                                                                                                                                                                                                                                                                                                                                                                                                                                                                                                                                                                                                                                                                                                                                                                                                                                                                                                                                                                                                        |                                    |                                    |          |           |           |                    |                    |     |       |      |      |      |      |      |      |      |       |      |      |      |      |      |      |      |       |   |      |        |        |      |     |   |        |    |      |        |        |      |     |   |        |   |      |        |        |      |     |   |        |      |      |      |      |      |      |      |       |      |      |      |      |      |      |      |       |      |      |      |      |      |      |      |        |      |      |      |      |      |      |      |        |      |      |      |      |      |      |      |        |      |      |      |      |      |      |      |       |      |      |      |      |      |      |      |  |  |  |  |  |  |  |
|      |                                                                                                                                                                                            |                                                                                                                                                                                                                                                                                                                                                                                                                                                                                                                                                                                                                                                                                                                                                                                                                                                                                                                                                                                                                                                                                                                                                                                                                                                                                                                                                                                                                                                                                                                                                                                                                                                                                                                                                                                                        |                                    |                                    |          |           |           |                    |                    |     |       |      |      |      |      |      |      |      |       |      |      |      |      |      |      |      |       |   |      |        |        |      |     |   |        |    |      |        |        |      |     |   |        |   |      |        |        |      |     |   |        |      |      |      |      |      |      |      |       |      |      |      |      |      |      |      |       |      |      |      |      |      |      |      |        |      |      |      |      |      |      |      |        |      |      |      |      |      |      |      |        |      |      |      |      |      |      |      |       |      |      |      |      |      |      |      |  |  |  |  |  |  |  |
|      |                                                                                                                                                                                            |                                                                                                                                                                                                                                                                                                                                                                                                                                                                                                                                                                                                                                                                                                                                                                                                                                                                                                                                                                                                                                                                                                                                                                                                                                                                                                                                                                                                                                                                                                                                                                                                                                                                                                                                                                                                        |                                    |                                    |          |           |           |                    |                    |     |       |      |      |      |      |      |      |      |       |      |      |      |      |      |      |      |       |   |      |        |        |      |     |   |        |    |      |        |        |      |     |   |        |   |      |        |        |      |     |   |        |      |      |      |      |      |      |      |       |      |      |      |      |      |      |      |       |      |      |      |      |      |      |      |        |      |      |      |      |      |      |      |        |      |      |      |      |      |      |      |        |      |      |      |      |      |      |      |       |      |      |      |      |      |      |      |  |  |  |  |  |  |  |
|      |                                                                                                                                                                                            |                                                                                                                                                                                                                                                                                                                                                                                                                                                                                                                                                                                                                                                                                                                                                                                                                                                                                                                                                                                                                                                                                                                                                                                                                                                                                                                                                                                                                                                                                                                                                                                                                                                                                                                                                                                                        |                                    |                                    |          |           |           |                    |                    |     |       |      |      |      |      |      |      |      |       |      |      |      |      |      |      |      |       |   |      |        |        |      |     |   |        |    |      |        |        |      |     |   |        |   |      |        |        |      |     |   |        |      |      |      |      |      |      |      |       |      |      |      |      |      |      |      |       |      |      |      |      |      |      |      |        |      |      |      |      |      |      |      |        |      |      |      |      |      |      |      |        |      |      |      |      |      |      |      |       |      |      |      |      |      |      |      |  |  |  |  |  |  |  |
|      |                                                                                                                                                                                            |                                                                                                                                                                                                                                                                                                                                                                                                                                                                                                                                                                                                                                                                                                                                                                                                                                                                                                                                                                                                                                                                                                                                                                                                                                                                                                                                                                                                                                                                                                                                                                                                                                                                                                                                                                                                        |                                    |                                    |          |           |           |                    |                    |     |       |      |      |      |      |      |      |      |       |      |      |      |      |      |      |      |       |   |      |        |        |      |     |   |        |    |      |        |        |      |     |   |        |   |      |        |        |      |     |   |        |      |      |      |      |      |      |      |       |      |      |      |      |      |      |      |       |      |      |      |      |      |      |      |        |      |      |      |      |      |      |      |        |      |      |      |      |      |      |      |        |      |      |      |      |      |      |      |       |      |      |      |      |      |      |      |  |  |  |  |  |  |  |

AD1: Exp. & Pred. tR are accepted for this candidate (box1)

AD2: Although there is error, exp. & pred. tR are accepted for this candidate (box2)

N.D.: Not detected.

All institutes have acceptable exp. RTI values and the difference is **not significant at 99% CIs** of the calibration curve. **Promote "Lab 13" to level 2!**

**Table S7** Practical application of RTI and FOR-IDENT platform for identification of emerging pollutants. Compounds removed from the list as likely wrongly identified

| Name             | InChi key                   | CAS        | $\Delta \log D$ |
|------------------|-----------------------------|------------|-----------------|
| pipamperone      | AXKPFOAXAHJUAG-UHFFFAOYSA-N | 1893-33-0  | 8.98            |
| etamiphyllin     | AWKLBIOQCIORSB-UHFFFAOYSA-N | 314-35-2   | 6.47            |
| fleroxacin       | XBJBPGROQZJDOJ-UHFFFAOYSA-N | 79660-72-3 | 6.14            |
| Dipropetryn      | NPWMZOGDXOFZIN-UHFFFAOYSA-N | 4147-51-7  | 5.94            |
| morphine         | BQJCRHHNABKAKU-KBQPJGBKSA-N | 57-27-2    | 5.39            |
| norcodeine       | HKOIXWVRNLGFOR-YANNOPNSA-N  | 467-15-2   | 5.37            |
| galantamine      | ASUTZQLVASHGKV-JDFRZJQESA-N | 357-70-0   | 5.34            |
| adenosine        | OIRDTQYFTABQOQ-UHFFFAOYSA-N | 58-61-7    | 5.24            |
| Vidarabine       | OIRDTQYFTABQOQ-UHTZMRCNSA-N | 5536-17-4  | 5.24            |
| betaxolol        | NWIUTZDMDHAVTP-UHFFFAOYSA-N | 63659-18-7 | 5.20            |
| Morphine,dihydro | IJVCMSMFSCRME-KBQPJGBKSA-N  | 509-60-4   | 5.10            |
| tranlycypromine  | AELCINSCMGFISI-DTWKUNHWSA-N | 13492-01-8 | 5.09            |
| tranlycypromine  | AELCINSCMGFISI-YGPZHELTA-N  | 155-09-9   | 5.09            |
